# Supplementary material for: More than 75 percent decline over 27 years in total flying insect biomass in protected areas
Source: PLoS One. 2017 Oct 18;12(10):e0185809. doi: 10.1371/journal.pone.0185809 (PMC5646769; doi:10.1371/journal.pone.0185809)
Supplement: S1 Dataset — (CSV) [file pone.0185809.s004.csv]

plot	year	from	to	from.daynr	to.daynr	biomass	potID	E	N	location.type	mean.daynr
SLL1	2011	05-07	27-07	186	208	80	1	6.602298	51.623313	2	197
SLL1	2011	28-07	11-08	209	223	69.5	2	6.602298	51.623313	2	216
SLL1	2011	12-08	25-08	224	237	96.5	3	6.602298	51.623313	2	230.5
SLL1	2011	26-08	10-09	238	253	54	4	6.602298	51.623313	2	245.5
POM1	2015	21-03	09-04	80	99	2.4	5	7.239916	50.170619	3	89.5
POM1	2015	10-04	30-04	100	120	24.3	6	7.239916	50.170619	3	110
POM1	2015	01-05	19-05	121	139	32.5	7	7.239916	50.170619	3	130
POM1	2015	20-05	10-06	140	161	59.8	8	7.239916	50.170619	3	150.5
POM1	2015	11-06	01-07	162	182	96	9	7.239916	50.170619	3	172
POM1	2015	02-07	20-07	183	201	65.7	10	7.239916	50.170619	3	192
POM1	2015	21-07	11-08	202	223	40.1	11	7.239916	50.170619	3	212.5
POM1	2015	12-08	08-09	224	251	38.4	12	7.239916	50.170619	3	237.5
POM1	2015	09-09	10-10	252	283	40.8	13	7.239916	50.170619	3	267.5
POM1	2015	11-10	30-10	284	303	13.8	14	7.239916	50.170619	3	293.5
LIN1	2016	13-04	08-05	103	128	27.9	15	7.34949	51.010856	2	115.5
LIN1	2016	09-05	06-06	129	157	87.1	16	7.34949	51.010856	2	143
LIN1	2016	07-06	30-06	158	181	55.5	17	7.34949	51.010856	2	169.5
LIN1	2016	01-07	25-07	182	206	108.1	18	7.34949	51.010856	2	194
LIN1	2016	26-07	09-08	207	221	46.2	19	7.34949	51.010856	2	214
LIN1	2016	10-08	31-08	222	243	96.6	20	7.34949	51.010856	2	232.5
LIN1	2016	01-09	14-09	244	257	52.1	21	7.34949	51.010856	2	250.5
LIN1	2016	15-09	29-09	258	272	51.1	22	7.34949	51.010856	2	265
LIN1	2016	30-09	17-10	273	290	11.8	23	7.34949	51.010856	2	281.5
LIN1	2016	18-10	04-11	291	308	3.2	24	7.34949	51.010856	2	299.5
LIN2	2016	13-04	08-05	103	128	48.7	25	7.351866	51.025598	2	115.5
LIN2	2016	09-05	06-06	129	157	60.7	26	7.351866	51.025598	2	143
LIN2	2016	07-06	30-06	158	181	81.9	27	7.351866	51.025598	2	169.5
LIN2	2016	01-07	25-07	182	206	92.8	28	7.351866	51.025598	2	194
LIN2	2016	26-07	09-08	207	221	49.3	29	7.351866	51.025598	2	214
LIN2	2016	10-08	31-08	222	243	90.7	30	7.351866	51.025598	2	232.5
LIN2	2016	01-09	14-09	244	257	42.7	31	7.351866	51.025598	2	250.5
LIN2	2016	15-09	29-09	258	272	30.9	32	7.351866	51.025598	2	265
LIN2	2016	30-09	17-10	273	290	23.3	33	7.351866	51.025598	2	281.5
LIN2	2016	18-10	04-11	291	308	7.4	34	7.351866	51.025598	2	299.5
KAN2	2016	01-05	18-05	121	138	31.5	35	6.697179	51.627065	1	129.5
KAN2	2016	19-05	08-06	139	159	17.9	36	6.697179	51.627065	1	149
KAN2	2016	09-06	27-06	160	178	23.6	37	6.697179	51.627065	1	169
KAN2	2016	28-06	16-07	179	197	36.3	38	6.697179	51.627065	1	188
KAN2	2016	17-07	13-08	198	225	26.3	39	6.697179	51.627065	1	211.5
KAN2	2016	14-08	06-09	226	249	52.4	40	6.697179	51.627065	1	237.5
KAN2	2016	07-09	01-10	250	274	10.4	41	6.697179	51.627065	1	262
KAN2	2016	02-10	26-10	275	299	3.4	42	6.697179	51.627065	1	287
PLI2	2016	01-05	18-05	121	138	39.4	43	6.70088	51.650631	1	129.5
PLI2	2016	19-05	08-06	139	159	48.2	44	6.70088	51.650631	1	149
PLI2	2016	09-06	27-06	160	178	39.1	45	6.70088	51.650631	1	169
PLI2	2016	28-06	16-07	179	197	52.5	46	6.70088	51.650631	1	188
PLI2	2016	17-07	13-08	198	225	51.5	47	6.70088	51.650631	1	211.5
PLI2	2016	14-08	06-09	226	249	21.5	48	6.70088	51.650631	1	237.5
PLI2	2016	07-09	01-10	250	274	27.1	49	6.70088	51.650631	1	262
PLI2	2016	02-10	26-10	275	299	16.6	50	6.70088	51.650631	1	287
SOL1	2016	05-05	19-05	125	139	44.1	51	6.625891	50.726761	2	132
SOL1	2016	20-05	01-06	140	152	33.8	52	6.625891	50.726761	2	146
SOL1	2016	02-06	14-06	153	165	55.8	53	6.625891	50.726761	2	159
SOL1	2016	15-06	27-06	166	178	69.3	54	6.625891	50.726761	2	172
SOL1	2016	28-06	31-07	179	212	95.4	55	6.625891	50.726761	2	195.5
SOL1	2016	01-08	24-08	213	236	77.6	56	6.625891	50.726761	2	224.5
SOL1	2016	25-08	21-09	237	264	62.9	57	6.625891	50.726761	2	250.5
SOL1	2016	22-09	03-11	265	307	24.5	58	6.625891	50.726761	2	286
SOL2	2016	05-05	19-05	125	139	39.3	59	6.563456	50.745191	2	132
SOL2	2016	20-05	01-06	140	152	39.7	60	6.563456	50.745191	2	146
SOL2	2016	02-06	14-06	153	165	48	61	6.563456	50.745191	2	159
SOL2	2016	15-06	27-06	166	178	72.2	62	6.563456	50.745191	2	172
SOL2	2016	28-06	31-07	179	212	60.6	63	6.563456	50.745191	2	195.5
SOL2	2016	01-08	24-08	213	236	60.1	64	6.563456	50.745191	2	224.5
SOL2	2016	25-08	21-09	237	264	92	65	6.563456	50.745191	2	250.5
SOL2	2016	22-09	03-11	265	307	25.1	66	6.563456	50.745191	2	286
SPE1	2016	14-04	29-04	104	119	23.7	67	6.703692	51.335317	2	111.5
SPE1	2016	30-04	13-05	120	133	44.8	68	6.703692	51.335317	2	126.5
SPE1	2016	14-05	27-05	134	147	53	69	6.703692	51.335317	2	140.5
SPE1	2016	28-05	09-06	148	160	53.5	70	6.703692	51.335317	2	154
SPE1	2016	10-06	26-06	161	177	64.6	71	6.703692	51.335317	2	169
SPE1	2016	27-06	15-07	178	196	46.3	72	6.703692	51.335317	2	187
SPE1	2016	16-07	08-08	197	220	75.1	73	6.703692	51.335317	2	208.5
SPE1	2016	09-08	02-09	221	245	34.4	74	6.703692	51.335317	2	233
SPE1	2016	03-09	28-09	246	271	41.9	75	6.703692	51.335317	2	258.5
SPE1	2016	29-09	30-10	272	303	18.3	76	6.703692	51.335317	2	287.5
NIE1	1994	22-05	27-05	142	147	44.2	77	6.569321	51.379931	2	144.5
NIE1	1994	28-05	03-06	148	154	45	78	6.569321	51.379931	2	151
NIE1	1994	04-06	10-06	155	161	25.1	79	6.569321	51.379931	2	158
NIE1	1994	11-06	17-06	162	168	32.2	80	6.569321	51.379931	2	165
NIE1	1994	18-06	24-06	169	175	65.9	81	6.569321	51.379931	2	172
NIE1	1994	25-06	01-07	176	182	100.2	82	6.569321	51.379931	2	179
NIE1	1994	02-07	08-07	183	189	82.7	83	6.569321	51.379931	2	186
NIE1	1994	09-07	15-07	190	196	113.8	84	6.569321	51.379931	2	193
NIE1	1994	16-07	22-07	197	203	118.5	85	6.569321	51.379931	2	200
NIE1	1994	23-07	29-07	204	210	80.7	86	6.569321	51.379931	2	207
NIE1	1994	30-07	05-08	211	217	62.6	87	6.569321	51.379931	2	214
NIE1	1994	06-08	12-08	218	224	57.3	88	6.569321	51.379931	2	221
NIE1	1994	13-08	19-08	225	231	40.4	89	6.569321	51.379931	2	228
NIE1	1994	20-08	26-08	232	238	28.4	90	6.569321	51.379931	2	235
NIE1	1994	27-08	02-09	239	245	20.9	91	6.569321	51.379931	2	242
NIE1	1994	03-09	09-09	246	252	17.6	92	6.569321	51.379931	2	249
NIE1	1994	10-09	16-09	253	259	15.8	93	6.569321	51.379931	2	256
NIE1	1994	17-09	23-09	260	266	10.7	94	6.569321	51.379931	2	263
NIE1	1994	24-09	14-10	267	287	26.2	95	6.569321	51.379931	2	277
NIE1	1994	15-10	30-10	288	303	31.9	96	6.569321	51.379931	2	295.5
BIR1	2000	30-04	05-05	120	125	37.2	97	6.466032	51.62895	2	122.5
BIR1	2000	06-05	12-05	126	132	76.1	98	6.466032	51.62895	2	129
BIR1	2000	13-05	19-05	133	139	59.6	99	6.466032	51.62895	2	136
BIR1	2000	20-05	26-05	140	146	40.3	100	6.466032	51.62895	2	143
BIR1	2000	27-05	03-06	147	154	41.9	101	6.466032	51.62895	2	150.5
BIR1	2000	04-06	09-06	155	160	47.7	102	6.466032	51.62895	2	157.5
BIR1	2000	10-06	16-06	161	167	73.9	103	6.466032	51.62895	2	164
BIR1	2000	17-06	23-06	168	174	98.6	104	6.466032	51.62895	2	171
BIR1	2000	24-06	02-07	175	183	67.2	105	6.466032	51.62895	2	179
BIR1	2000	03-07	08-07	184	189	33	106	6.466032	51.62895	2	186.5
BIR1	2000	09-07	16-07	190	197	30.4	107	6.466032	51.62895	2	193.5
BIR1	2000	17-07	22-07	198	203	35.2	108	6.466032	51.62895	2	200.5
BIR1	2000	23-07	29-07	204	210	32.5	109	6.466032	51.62895	2	207
BIR1	2000	30-07	07-08	211	219	47.3	110	6.466032	51.62895	2	215
BIR1	2000	08-08	15-08	220	227	30	111	6.466032	51.62895	2	223.5
BIR1	2000	16-08	22-08	228	234	28.2	112	6.466032	51.62895	2	231
BIR1	2000	23-08	29-08	235	241	24.6	113	6.466032	51.62895	2	238
BIR1	2000	30-08	05-09	242	248	19.2	114	6.466032	51.62895	2	245
BIR1	2000	06-09	12-09	249	255	15.4	115	6.466032	51.62895	2	252
BIR1	2000	13-09	21-09	256	264	9.9	116	6.466032	51.62895	2	260
BIR1	2000	22-09	12-10	265	285	12.5	117	6.466032	51.62895	2	275
PIM1	1994	23-06	29-06	174	180	86.1	118	6.909303	51.230597	3	177
PIM1	1994	30-06	07-07	181	188	86	119	6.909303	51.230597	3	184.5
PIM1	1994	08-07	13-07	189	194	64.7	120	6.909303	51.230597	3	191.5
PIM1	1994	14-07	20-07	195	201	88.9	121	6.909303	51.230597	3	198
PIM1	1994	21-07	27-07	202	208	78.4	122	6.909303	51.230597	3	205
PIM1	1994	28-07	03-08	209	215	52.8	123	6.909303	51.230597	3	212
PIM1	1994	04-08	17-08	216	229	127.7	124	6.909303	51.230597	3	222.5
PIM1	1994	18-08	01-09	230	244	108.6	125	6.909303	51.230597	3	237
GRI1	1991	15-05	27-05	135	147	12.7	126	13.958853	52.198165	1	141
GRI1	1991	28-05	10-06	148	161	15.9	127	13.958853	52.198165	1	154.5
GRI1	1991	11-06	24-06	162	175	22.7	128	13.958853	52.198165	1	168.5
GRI1	1991	25-06	06-07	176	187	43.4	129	13.958853	52.198165	1	181.5
GRI1	1991	07-07	21-07	188	202	75.7	130	13.958853	52.198165	1	195
GRI1	1991	22-07	05-08	203	217	114.8	131	13.958853	52.198165	1	210
GRI1	1991	06-08	20-08	218	232	68	132	13.958853	52.198165	1	225
GRI1	1991	21-08	31-08	233	243	41.6	133	13.958853	52.198165	1	238
GRI1	1991	01-09	15-09	244	258	55.3	134	13.958853	52.198165	1	251
GRI1	1991	16-09	07-10	259	280	22.1	135	13.958853	52.198165	1	269.5
LAN1	1992	04-05	17-05	124	137	18.2	136	13.931883	52.181324	1	130.5
LAN1	1992	18-05	29-05	138	149	38.1	137	13.931883	52.181324	1	143.5
LAN1	1992	30-05	14-06	150	165	58.6	138	13.931883	52.181324	1	157.5
LAN1	1992	15-06	28-06	166	179	25.8	139	13.931883	52.181324	1	172.5
LAN1	1992	29-06	12-07	180	193	57.4	140	13.931883	52.181324	1	186.5
LAN1	1992	13-07	26-07	194	207	81.8	141	13.931883	52.181324	1	200.5
LAN1	1992	27-07	09-08	208	221	157.1	142	13.931883	52.181324	1	214.5
LAN1	1992	10-08	23-08	222	235	136.1	143	13.931883	52.181324	1	228.5
LAN1	1992	24-08	05-09	236	248	47.8	144	13.931883	52.181324	1	242
LAN1	1992	06-09	22-09	249	265	19.2	145	13.931883	52.181324	1	257
BKL1	1993	15-04	28-04	105	118	15.4	146	14.261445	51.919451	1	111.5
BKL1	1993	29-04	12-05	119	132	17.3	147	14.261445	51.919451	1	125.5
BKL1	1993	13-05	25-05	133	145	32.2	148	14.261445	51.919451	1	139
BKL1	1993	26-05	09-06	146	160	34.2	149	14.261445	51.919451	1	153
BKL1	1993	10-06	23-06	161	174	10.9	150	14.261445	51.919451	1	167.5
BKL1	1993	24-06	08-07	175	189	29.5	151	14.261445	51.919451	1	182
BKL1	1993	09-07	21-07	190	202	28.6	152	14.261445	51.919451	1	196
BKL1	1993	22-07	04-08	203	216	47.6	153	14.261445	51.919451	1	209.5
BKL1	1993	05-08	18-08	217	230	132.8	154	14.261445	51.919451	1	223.5
BKL1	1993	19-08	01-09	231	244	89.7	155	14.261445	51.919451	1	237.5
BKL1	1993	02-09	15-09	245	258	122.8	156	14.261445	51.919451	1	251.5
BKL1	1993	16-09	29-09	259	272	54.1	157	14.261445	51.919451	1	265.5
LIE1	1993	15-04	28-04	105	118	30.5	158	14.295868	51.945849	1	111.5
LIE1	1993	29-04	12-05	119	132	42.4	159	14.295868	51.945849	1	125.5
LIE1	1993	13-05	25-05	133	145	44.4	160	14.295868	51.945849	1	139
LIE1	1993	26-05	09-06	146	160	46.6	161	14.295868	51.945849	1	153
LIE1	1993	10-06	23-06	161	174	24.1	162	14.295868	51.945849	1	167.5
LIE1	1993	24-06	08-07	175	189	43.2	163	14.295868	51.945849	1	182
LIE1	1993	09-07	21-07	190	202	63.3	164	14.295868	51.945849	1	196
LIE1	1993	22-07	04-08	203	216	97.7	165	14.295868	51.945849	1	209.5
LIE1	1993	05-08	18-08	217	230	117.8	166	14.295868	51.945849	1	223.5
LIE1	1993	19-08	01-09	231	244	56.4	167	14.295868	51.945849	1	237.5
LIE1	1993	02-09	15-09	245	258	40.9	168	14.295868	51.945849	1	251.5
LIE3	1995	24-07	30-07	205	211	73.8	169	14.298035	51.945518	1	208
LIE3	1995	31-07	06-08	212	218	48.2	170	14.298035	51.945518	1	215
LIE3	1995	07-08	13-08	219	225	28.7	171	14.298035	51.945518	1	222
LIE3	1995	14-08	20-08	226	232	18.2	172	14.298035	51.945518	1	229
LIE3	1995	21-08	27-08	233	239	26.5	173	14.298035	51.945518	1	236
LIE3	1995	28-08	03-09	240	246	13.1	174	14.298035	51.945518	1	243
LIE3	1995	04-09	10-09	247	253	35.1	175	14.298035	51.945518	1	250
LIE3	1995	11-09	17-09	254	260	37.6	176	14.298035	51.945518	1	257
LIE3	1995	18-09	24-09	261	267	47.8	177	14.298035	51.945518	1	264
LIE3	1995	25-09	01-10	268	274	60.3	178	14.298035	51.945518	1	271
LIE3	1995	02-10	09-10	275	282	34	179	14.298035	51.945518	1	278.5
SOL1	1994	19-03	01-04	78	91	9	180	6.625891	50.726761	2	84.5
SOL1	1994	02-04	15-04	92	105	9.6	181	6.625891	50.726761	2	98.5
SOL1	1994	16-04	29-04	106	119	42.2	182	6.625891	50.726761	2	112.5
SOL1	1994	30-04	13-05	120	133	72.5	183	6.625891	50.726761	2	126.5
SOL1	1994	14-05	27-05	134	147	41.3	184	6.625891	50.726761	2	140.5
SOL1	1994	28-05	10-06	148	161	36.3	185	6.625891	50.726761	2	154.5
SOL1	1994	11-06	24-06	162	175	98.1	186	6.625891	50.726761	2	168.5
SOL1	1994	25-06	08-07	176	189	143.7	187	6.625891	50.726761	2	182.5
SOL1	1994	09-07	22-07	190	203	496.5	188	6.625891	50.726761	2	196.5
SOL1	1994	23-07	05-08	204	217	433.4	189	6.625891	50.726761	2	210.5
SOL1	1994	06-08	19-08	218	231	113.7	190	6.625891	50.726761	2	224.5
SOL1	1994	20-08	02-09	232	245	73.9	191	6.625891	50.726761	2	238.5
SOL1	1994	03-09	16-09	246	259	53	192	6.625891	50.726761	2	252.5
SOL1	1994	17-09	30-09	260	273	36	193	6.625891	50.726761	2	266.5
SOL1	1994	01-10	14-10	274	287	17.8	194	6.625891	50.726761	2	280.5
SOL1	1994	15-10	29-10	288	302	16.9	195	6.625891	50.726761	2	295
SOL2	1994	19-03	01-04	78	91	3.4	196	6.563456	50.745191	2	84.5
SOL2	1994	02-04	15-04	92	105	4.6	197	6.563456	50.745191	2	98.5
SOL2	1994	16-04	29-04	106	119	17.7	198	6.563456	50.745191	2	112.5
SOL2	1994	30-04	13-05	120	133	34.2	199	6.563456	50.745191	2	126.5
SOL2	1994	14-05	27-05	134	147	25.3	200	6.563456	50.745191	2	140.5
SOL2	1994	28-05	10-06	148	161	27.4	201	6.563456	50.745191	2	154.5
SOL2	1994	11-06	24-06	162	175	46.2	202	6.563456	50.745191	2	168.5
SOL2	1994	25-06	08-07	176	189	83.9	203	6.563456	50.745191	2	182.5
SOL2	1994	09-07	22-07	190	203	168	204	6.563456	50.745191	2	196.5
SOL2	1994	23-07	05-08	204	217	146.8	205	6.563456	50.745191	2	210.5
SOL2	1994	06-08	19-08	218	231	43.1	206	6.563456	50.745191	2	224.5
SOL2	1994	20-08	02-09	232	245	34.5	207	6.563456	50.745191	2	238.5
SOL2	1994	03-09	16-09	246	259	16.2	208	6.563456	50.745191	2	252.5
SOL2	1994	17-09	30-09	260	273	20.3	209	6.563456	50.745191	2	266.5
SOL2	1994	01-10	14-10	274	287	7.6	210	6.563456	50.745191	2	280.5
SOL2	1994	15-10	29-10	288	302	5.8	211	6.563456	50.745191	2	295
POM1	1997	02-05	09-05	122	129	9.8	212	7.239916	50.170619	3	125.5
POM1	1997	10-05	16-05	130	136	28.7	213	7.239916	50.170619	3	133
POM1	1997	17-05	22-05	137	142	14.6	214	7.239916	50.170619	3	139.5
POM1	1997	23-05	29-05	143	149	36.9	215	7.239916	50.170619	3	146
POM1	1997	30-05	05-06	150	156	37.9	216	7.239916	50.170619	3	153
POM1	1997	06-06	11-06	157	162	39.5	217	7.239916	50.170619	3	159.5
POM1	1997	12-06	19-06	163	170	30.2	218	7.239916	50.170619	3	166.5
POM1	1997	20-06	27-06	171	178	14.7	219	7.239916	50.170619	3	174.5
POM1	1997	28-06	03-07	179	184	25.2	220	7.239916	50.170619	3	181.5
POM1	1997	04-07	10-07	185	191	28.1	221	7.239916	50.170619	3	188
POM1	1997	11-07	17-07	192	198	41.9	222	7.239916	50.170619	3	195
POM1	1997	18-07	24-07	199	205	74.1	223	7.239916	50.170619	3	202
POM1	1997	25-07	31-07	206	212	77.3	224	7.239916	50.170619	3	209
POM1	1997	01-08	07-08	213	219	42.8	225	7.239916	50.170619	3	216
POM1	1997	08-08	14-08	220	226	20.4	226	7.239916	50.170619	3	223
POM1	1997	15-08	21-08	227	233	14.5	227	7.239916	50.170619	3	230
POM1	1997	22-08	29-08	234	241	13.7	228	7.239916	50.170619	3	237.5
POM1	1997	30-08	11-09	242	254	20.6	229	7.239916	50.170619	3	248
POM1	1997	12-09	25-09	255	268	27	230	7.239916	50.170619	3	261.5
POM1	1997	26-09	10-10	269	283	7.4	231	7.239916	50.170619	3	276
LAT3	2000	24-04	29-04	114	119	33.1	232	6.65202	51.313731	2	116.5
LAT3	2000	30-04	06-05	120	126	46.2	233	6.65202	51.313731	2	123
LAT3	2000	07-05	13-05	127	133	65.9	234	6.65202	51.313731	2	130
LAT3	2000	14-05	20-05	134	140	36.4	235	6.65202	51.313731	2	137
LAT3	2000	21-05	27-05	141	147	27.7	236	6.65202	51.313731	2	144
LAT3	2000	28-05	03-06	148	154	28.7	237	6.65202	51.313731	2	151
LAT3	2000	04-06	10-06	155	161	51.2	238	6.65202	51.313731	2	158
LAT3	2000	11-06	17-06	162	168	54.7	239	6.65202	51.313731	2	165
LAT3	2000	18-06	24-06	169	175	85.6	240	6.65202	51.313731	2	172
LAT3	2000	25-06	01-07	176	182	37.2	241	6.65202	51.313731	2	179
LAT3	2000	02-07	08-07	183	189	39.5	242	6.65202	51.313731	2	186
LAT3	2000	09-07	15-07	190	196	19.9	243	6.65202	51.313731	2	193
LAT3	2000	16-07	22-07	197	203	27.8	244	6.65202	51.313731	2	200
LAT3	2000	23-07	29-07	204	210	31.3	245	6.65202	51.313731	2	207
LAT3	2000	30-07	05-08	211	217	18.9	246	6.65202	51.313731	2	214
LAT3	2000	06-08	12-08	218	224	18.7	247	6.65202	51.313731	2	221
LAT3	2000	13-08	19-08	225	231	17.2	248	6.65202	51.313731	2	228
LAT3	2000	20-08	26-08	232	238	24	249	6.65202	51.313731	2	235
LAT3	2000	27-08	02-09	239	245	13.6	250	6.65202	51.313731	2	242
LAT3	2000	03-09	09-09	246	252	12.6	251	6.65202	51.313731	2	249
LAT3	2000	10-09	16-09	253	259	8.1	252	6.65202	51.313731	2	256
LAT3	2000	17-09	23-09	260	266	7.3	253	6.65202	51.313731	2	263
LAT3	2000	24-09	30-09	267	273	6.7	254	6.65202	51.313731	2	270
LAT3	2000	01-10	07-10	274	280	4.2	255	6.65202	51.313731	2	277
LAT3	2000	08-10	14-10	281	287	4.9	256	6.65202	51.313731	2	284
LAT3	2000	15-10	22-10	288	295	3.7	257	6.65202	51.313731	2	291.5
SPE2	2003	30-03	05-04	89	95	0.8	258	6.719362	51.326078	2	92
SPE2	2003	06-04	12-04	96	102	4.1	259	6.719362	51.326078	2	99
SPE2	2003	13-04	19-04	103	109	14.4	260	6.719362	51.326078	2	106
SPE2	2003	20-04	26-04	110	116	19.2	261	6.719362	51.326078	2	113
SPE2	2003	27-04	03-05	117	123	17.6	262	6.719362	51.326078	2	120
SPE2	2003	04-05	10-05	124	130	38.5	263	6.719362	51.326078	2	127
SPE2	2003	11-05	17-05	131	137	26.2	264	6.719362	51.326078	2	134
SPE2	2003	18-05	24-05	138	144	18.4	265	6.719362	51.326078	2	141
SPE2	2003	25-05	31-05	145	151	26.3	266	6.719362	51.326078	2	148
SPE2	2003	01-06	07-06	152	158	44.7	267	6.719362	51.326078	2	155
SPE2	2003	08-06	14-06	159	165	82.1	268	6.719362	51.326078	2	162
SPE2	2003	15-06	21-06	166	172	54.9	269	6.719362	51.326078	2	169
SPE2	2003	22-06	28-06	173	179	50.5	270	6.719362	51.326078	2	176
SPE2	2003	29-06	05-07	180	186	46	271	6.719362	51.326078	2	183
SPE2	2003	06-07	12-07	187	193	44	272	6.719362	51.326078	2	190
SPE2	2003	13-07	19-07	194	200	42.3	273	6.719362	51.326078	2	197
SPE2	2003	20-07	26-07	201	207	38.2	274	6.719362	51.326078	2	204
SPE2	2003	27-07	02-08	208	214	39.6	275	6.719362	51.326078	2	211
SPE2	2003	03-08	09-08	215	221	52.1	276	6.719362	51.326078	2	218
SPE2	2003	10-08	16-08	222	228	27.2	277	6.719362	51.326078	2	225
SPE2	2003	17-08	23-08	229	235	30.8	278	6.719362	51.326078	2	232
SPE2	2003	24-08	30-08	236	242	28.6	279	6.719362	51.326078	2	239
SPE2	2003	31-08	06-09	243	249	18.9	280	6.719362	51.326078	2	246
SPE2	2003	07-09	13-09	250	256	16	281	6.719362	51.326078	2	253
SPE2	2003	14-09	20-09	257	263	19.4	282	6.719362	51.326078	2	260
SPE2	2003	21-09	27-09	264	270	14.1	283	6.719362	51.326078	2	267
SPE2	2003	28-09	04-10	271	277	5.1	284	6.719362	51.326078	2	274
SPE2	2003	05-10	12-10	278	285	4.9	285	6.719362	51.326078	2	281.5
HUK1	2004	04-04	17-04	94	107	18.4	286	6.628919	51.632269	2	100.5
HUK1	2004	18-04	01-05	108	121	21.1	287	6.628919	51.632269	2	114.5
HUK1	2004	02-05	15-05	122	135	31.1	288	6.628919	51.632269	2	128.5
HUK1	2004	16-05	22-05	136	142	32.4	289	6.628919	51.632269	2	139
HUK1	2004	23-05	29-05	143	149	32.9	290	6.628919	51.632269	2	146
HUK1	2004	30-05	05-06	150	156	33.7	291	6.628919	51.632269	2	153
HUK1	2004	06-06	12-06	157	163	49.5	292	6.628919	51.632269	2	160
HUK1	2004	13-06	19-06	164	170	56.2	293	6.628919	51.632269	2	167
HUK1	2004	20-06	26-06	171	177	53.8	294	6.628919	51.632269	2	174
HUK1	2004	27-06	03-07	178	184	49.5	295	6.628919	51.632269	2	181
HUK1	2004	04-07	10-07	185	191	45.3	296	6.628919	51.632269	2	188
HUK1	2004	11-07	17-07	192	198	43.4	297	6.628919	51.632269	2	195
HUK1	2004	18-07	24-07	199	205	47	298	6.628919	51.632269	2	202
HUK1	2004	25-07	31-07	206	212	47.4	299	6.628919	51.632269	2	209
HUK1	2004	01-08	07-08	213	219	34.7	300	6.628919	51.632269	2	216
HUK1	2004	08-08	14-08	220	226	76	301	6.628919	51.632269	2	223
HUK1	2004	15-08	21-08	227	233	31.3	302	6.628919	51.632269	2	230
HUK1	2004	22-08	28-08	234	240	27.1	303	6.628919	51.632269	2	237
HUK1	2004	29-08	04-09	241	247	25.8	304	6.628919	51.632269	2	244
HUK1	2004	05-09	11-09	248	254	28.1	305	6.628919	51.632269	2	251
HUK1	2004	12-09	25-09	255	268	41.2	306	6.628919	51.632269	2	261.5
HUK1	2004	26-09	09-10	269	282	17.2	307	6.628919	51.632269	2	275.5
HUK1	2004	10-10	24-10	283	297	8.7	308	6.628919	51.632269	2	290
XAN1	2005	15-04	29-04	105	119	32.8	309	6.443367	51.66906	2	112
XAN1	2005	30-04	14-05	120	134	37.1	310	6.443367	51.66906	2	127
XAN1	2005	15-05	28-05	135	148	31.2	311	6.443367	51.66906	2	141.5
XAN1	2005	29-05	10-06	149	161	61.9	312	6.443367	51.66906	2	155
XAN1	2005	11-06	26-06	162	177	89.6	313	6.443367	51.66906	2	169.5
XAN1	2005	27-06	06-08	178	218	NA	314	6.443367	51.66906	2	198
XAN1	2005	07-08	21-08	219	233	101.8	315	6.443367	51.66906	2	226
XAN1	2005	22-08	01-09	234	244	68.4	316	6.443367	51.66906	2	239
XAN1	2005	02-09	14-09	245	257	58	317	6.443367	51.66906	2	251
XAN1	2005	15-09	21-09	258	264	41.4	318	6.443367	51.66906	2	261
XAN1	2005	22-09	29-09	265	272	36.9	319	6.443367	51.66906	2	268.5
XAN1	2005	30-09	08-10	273	281	24.5	320	6.443367	51.66906	2	277
XAN2	2005	15-04	29-04	105	119	19.1	321	6.438562	51.666466	2	112
XAN2	2005	30-04	14-05	120	134	21	322	6.438562	51.666466	2	127
XAN2	2005	15-05	28-05	135	148	19.7	323	6.438562	51.666466	2	141.5
XAN2	2005	29-05	10-06	149	161	42.5	324	6.438562	51.666466	2	155
XAN2	2005	11-06	26-06	162	177	53.1	325	6.438562	51.666466	2	169.5
XAN2	2005	27-06	07-07	178	188	49	326	6.438562	51.666466	2	183
XAN2	2005	08-07	22-07	189	203	50.3	327	6.438562	51.666466	2	196
XAN2	2005	23-07	06-08	204	218	49.6	328	6.438562	51.666466	2	211
XAN2	2005	07-08	21-08	219	233	59.6	329	6.438562	51.666466	2	226
XAN2	2005	22-08	01-09	234	244	41	330	6.438562	51.666466	2	239
XAN2	2005	02-09	14-09	245	257	40.3	331	6.438562	51.666466	2	251
XAN2	2005	15-09	21-09	258	264	30.5	332	6.438562	51.666466	2	261
XAN2	2005	22-09	29-09	265	272	19.4	333	6.438562	51.666466	2	268.5
LIN1	2006	10-04	25-04	100	115	28.4	334	7.34949	51.010856	2	107.5
LIN1	2006	26-04	14-05	116	134	40.5	335	7.34949	51.010856	2	125
LIN1	2006	15-05	26-05	135	146	51.2	336	7.34949	51.010856	2	140.5
LIN1	2006	27-05	11-06	147	162	58.9	337	7.34949	51.010856	2	154.5
LIN1	2006	12-06	24-06	163	175	79.2	338	7.34949	51.010856	2	169
LIN1	2006	25-06	10-07	176	191	112	339	7.34949	51.010856	2	183.5
LIN1	2006	11-07	19-07	192	200	94.5	340	7.34949	51.010856	2	196
LIN1	2006	20-07	04-08	201	216	88.2	341	7.34949	51.010856	2	208.5
LIN1	2006	05-08	20-08	217	232	64.6	342	7.34949	51.010856	2	224.5
LIN1	2006	21-08	01-09	233	244	47.5	343	7.34949	51.010856	2	238.5
LIN1	2006	02-09	15-09	245	258	42.1	344	7.34949	51.010856	2	251.5
LIN1	2006	16-09	30-09	259	273	48.4	345	7.34949	51.010856	2	266
LIN1	2006	01-10	14-10	274	287	36.8	346	7.34949	51.010856	2	280.5
LIN2	2006	10-04	25-04	100	115	30.9	347	7.351866	51.025598	2	107.5
LIN2	2006	26-04	14-05	116	134	32	348	7.351866	51.025598	2	125
LIN2	2006	15-05	26-05	135	146	44.6	349	7.351866	51.025598	2	140.5
LIN2	2006	27-05	11-06	147	162	55.3	350	7.351866	51.025598	2	154.5
LIN2	2006	12-06	24-06	163	175	60.1	351	7.351866	51.025598	2	169
LIN2	2006	25-06	10-07	176	191	89.4	352	7.351866	51.025598	2	183.5
LIN2	2006	11-07	19-07	192	200	97.1	353	7.351866	51.025598	2	196
LIN2	2006	20-07	04-08	201	216	95.7	354	7.351866	51.025598	2	208.5
LIN2	2006	05-08	20-08	217	232	57.8	355	7.351866	51.025598	2	224.5
LIN2	2006	21-08	01-09	233	244	50.3	356	7.351866	51.025598	2	238.5
LIN2	2006	02-09	15-09	245	258	47.5	357	7.351866	51.025598	2	251.5
LIN2	2006	16-09	30-09	259	273	31.2	358	7.351866	51.025598	2	266
LIN2	2006	01-10	14-10	274	287	42.1	359	7.351866	51.025598	2	280.5
LEU1	2007	09-03	23-03	68	82	21.1	360	6.478536	51.543389	1	75
LEU1	2007	24-03	14-04	83	104	18.2	361	6.478536	51.543389	1	93.5
LEU1	2007	15-04	04-05	105	124	24.9	362	6.478536	51.543389	1	114.5
LEU1	2007	05-05	26-05	125	146	60.3	363	6.478536	51.543389	1	135.5
LEU1	2007	27-05	22-06	147	173	28.1	364	6.478536	51.543389	1	160
LEU1	2007	23-06	15-07	174	196	16.9	365	6.478536	51.543389	1	185
LEU1	2007	16-07	04-08	197	216	39.5	366	6.478536	51.543389	1	206.5
LEU1	2007	05-08	18-08	217	230	32	367	6.478536	51.543389	1	223.5
LEU1	2007	19-08	16-09	231	259	106.8	368	6.478536	51.543389	1	245
LEU2	2007	09-03	23-03	68	82	22.6	369	6.473072	51.548781	1	75
LEU2	2007	24-03	14-04	83	104	21.7	370	6.473072	51.548781	1	93.5
LEU2	2007	15-04	04-05	105	124	23.8	371	6.473072	51.548781	1	114.5
LEU2	2007	05-05	26-05	125	146	58.7	372	6.473072	51.548781	1	135.5
LEU2	2007	27-05	04-08	147	216	NA	373	6.473072	51.548781	1	181.5
LEU2	2007	05-08	18-08	217	230	33.6	374	6.473072	51.548781	1	223.5
LEU2	2007	19-08	16-09	231	259	45.7	375	6.473072	51.548781	1	245
BRA1	2008	21-04	02-05	111	122	28.7	376	6.143498	51.257831	1	116.5
BRA1	2008	03-05	09-05	123	129	13.6	377	6.143498	51.257831	1	126
BRA1	2008	10-05	16-05	130	136	19.7	378	6.143498	51.257831	1	133
BRA1	2008	17-05	31-05	137	151	28.9	379	6.143498	51.257831	1	144
BRA1	2008	01-06	14-06	152	165	34.2	380	6.143498	51.257831	1	158.5
BRA1	2008	15-06	25-06	166	176	32.1	381	6.143498	51.257831	1	171
BRA1	2008	26-06	06-07	177	187	44.5	382	6.143498	51.257831	1	182
BRA1	2008	07-07	18-07	188	199	36.8	383	6.143498	51.257831	1	193.5
BRA1	2008	19-07	03-08	200	215	32.9	384	6.143498	51.257831	1	207.5
BRA1	2008	04-08	15-08	216	227	16.4	385	6.143498	51.257831	1	221.5
BRA1	2008	16-08	31-08	228	243	15.4	386	6.143498	51.257831	1	235.5
BRA1	2008	01-09	29-09	244	272	18.1	387	6.143498	51.257831	1	258
BRA2	2008	21-04	02-05	111	122	29.1	388	6.143498	51.262715	1	116.5
BRA2	2008	03-05	09-05	123	129	13.1	389	6.143498	51.262715	1	126
BRA2	2008	10-05	16-05	130	136	13.6	390	6.143498	51.262715	1	133
BRA2	2008	17-05	31-05	137	151	21.9	391	6.143498	51.262715	1	144
BRA2	2008	01-06	14-06	152	165	33.3	392	6.143498	51.262715	1	158.5
BRA2	2008	15-06	25-06	166	176	33.4	393	6.143498	51.262715	1	171
BRA2	2008	26-06	06-07	177	187	23.1	394	6.143498	51.262715	1	182
BRA2	2008	07-07	18-07	188	199	46.2	395	6.143498	51.262715	1	193.5
BRA2	2008	19-07	03-08	200	215	33.5	396	6.143498	51.262715	1	207.5
BRA2	2008	04-08	15-08	216	227	15.7	397	6.143498	51.262715	1	221.5
BRA2	2008	16-08	31-08	228	243	11.4	398	6.143498	51.262715	1	235.5
BRA2	2008	01-09	29-09	244	272	11.3	399	6.143498	51.262715	1	258
BRA3	2009	02-04	17-04	92	107	17.3	400	6.140367	51.253778	1	99.5
BRA3	2009	18-04	17-05	108	137	35	401	6.140367	51.253778	1	122.5
BRA3	2009	18-05	31-05	138	151	40.1	402	6.140367	51.253778	1	144.5
BRA3	2009	01-06	18-06	152	169	29.4	403	6.140367	51.253778	1	160.5
BRA3	2009	19-06	05-07	170	186	31	404	6.140367	51.253778	1	178
BRA3	2009	06-07	15-07	187	196	20.2	405	6.140367	51.253778	1	191.5
BRA3	2009	16-07	28-07	197	209	17	406	6.140367	51.253778	1	203
BRA4	2009	02-04	17-04	92	107	24.1	407	6.131588	51.245263	1	99.5
BRA4	2009	18-04	17-05	108	137	32.6	408	6.131588	51.245263	1	122.5
BRA4	2009	18-05	05-07	138	186	NA	409	6.131588	51.245263	1	162
BRA4	2009	06-07	15-07	187	196	23.4	410	6.131588	51.245263	1	191.5
BRA4	2009	16-07	28-07	197	209	24.2	411	6.131588	51.245263	1	203
WAN1	2009	16-06	19-07	167	200	24	412	7.125584	50.899892	1	183.5
WAN1	2009	20-07	09-08	201	221	22	413	7.125584	50.899892	1	211
WAN1	2009	10-08	27-08	222	239	31.7	414	7.125584	50.899892	1	230.5
WAN1	2009	28-08	07-09	240	250	22.5	415	7.125584	50.899892	1	245
WAN1	2009	08-09	24-09	251	267	23.5	416	7.125584	50.899892	1	259
WAN1	2009	25-09	16-10	268	289	24.1	417	7.125584	50.899892	1	278.5
WAN2	2009	16-06	19-07	167	200	71	418	7.149393	50.884201	2	183.5
WAN2	2009	20-07	09-08	201	221	50.9	419	7.149393	50.884201	2	211
WAN2	2009	10-08	27-08	222	239	57.2	420	7.149393	50.884201	2	230.5
WAN2	2009	28-08	07-09	240	250	38.6	421	7.149393	50.884201	2	245
WAN2	2009	08-09	24-09	251	267	31.1	422	7.149393	50.884201	2	259
WAN2	2009	25-09	16-10	268	289	30.4	423	7.149393	50.884201	2	278.5
WAN3	2010	14-06	27-06	165	178	19.7	424	7.178522	50.85558	1	171.5
WAN3	2010	28-06	06-07	179	187	28.3	425	7.178522	50.85558	1	183
WAN3	2010	07-07	20-07	188	201	23.4	426	7.178522	50.85558	1	194.5
WAN3	2010	21-07	08-08	202	220	18.1	427	7.178522	50.85558	1	211
WAN3	2010	09-08	21-08	221	233	13.1	428	7.178522	50.85558	1	227
WAN3	2010	22-08	06-09	234	249	10.2	429	7.178522	50.85558	1	241.5
WAN4	2010	14-06	27-06	165	178	15.1	430	7.175735	50.857721	1	171.5
WAN4	2010	28-06	06-07	179	187	19.8	431	7.175735	50.857721	1	183
WAN4	2010	07-07	20-07	188	201	19.9	432	7.175735	50.857721	1	194.5
WAN4	2010	21-07	08-08	202	220	22.5	433	7.175735	50.857721	1	211
WAN4	2010	09-08	21-08	221	233	21.6	434	7.175735	50.857721	1	227
WAN4	2010	22-08	06-09	234	249	8.1	435	7.175735	50.857721	1	241.5
RAH1	2012	14-04	20-04	104	110	2.5	436	6.467202	51.400561	2	107
RAH1	2012	21-04	05-05	111	125	16.4	437	6.467202	51.400561	2	118
RAH1	2012	06-05	18-05	126	138	18.2	438	6.467202	51.400561	2	132
RAH1	2012	19-05	01-06	139	152	48.7	439	6.467202	51.400561	2	145.5
RAH1	2012	02-06	15-06	153	166	25.3	440	6.467202	51.400561	2	159.5
RAH1	2012	16-06	29-06	167	180	58.5	441	6.467202	51.400561	2	173.5
RAH1	2012	30-06	13-07	181	194	44.5	442	6.467202	51.400561	2	187.5
RAH1	2012	14-07	27-07	195	208	55.1	443	6.467202	51.400561	2	201.5
RAH1	2012	28-07	10-08	209	222	51.4	444	6.467202	51.400561	2	215.5
RAH1	2012	11-08	24-08	223	236	48.6	445	6.467202	51.400561	2	229.5
RAH1	2012	25-08	07-09	237	250	17.8	446	6.467202	51.400561	2	243.5
RAH1	2012	08-09	22-09	251	265	12.2	447	6.467202	51.400561	2	258
RAH2	2012	21-04	05-05	111	125	23.5	448	6.480208	51.403085	2	118
RAH2	2012	06-05	18-05	126	138	17.1	449	6.480208	51.403085	2	132
RAH2	2012	19-05	01-06	139	152	43.9	450	6.480208	51.403085	2	145.5
RAH2	2012	02-06	15-06	153	166	24.9	451	6.480208	51.403085	2	159.5
RAH2	2012	16-06	29-06	167	180	41.8	452	6.480208	51.403085	2	173.5
RAH2	2012	30-06	13-07	181	194	34.6	453	6.480208	51.403085	2	187.5
RAH2	2012	14-07	27-07	195	208	30.4	454	6.480208	51.403085	2	201.5
RAH2	2012	28-07	10-08	209	222	32	455	6.480208	51.403085	2	215.5
RAH2	2012	11-08	24-08	223	236	32.7	456	6.480208	51.403085	2	229.5
RAH2	2012	25-08	07-09	237	250	20.9	457	6.480208	51.403085	2	243.5
RAH2	2012	08-09	22-09	251	265	12.6	458	6.480208	51.403085	2	258
URD1	2013	10-04	04-05	100	124	13.2	459	6.865028	51.137556	2	112
URD1	2013	05-05	12-05	125	132	17.1	460	6.865028	51.137556	2	128.5
URD1	2013	13-05	21-05	133	141	19.9	461	6.865028	51.137556	2	137
URD1	2013	22-05	29-05	142	149	16.7	462	6.865028	51.137556	2	145.5
URD1	2013	30-05	08-06	150	159	16	463	6.865028	51.137556	2	154.5
URD1	2013	09-06	15-06	160	166	5.6	464	6.865028	51.137556	2	163
URD1	2013	16-06	01-07	167	182	25.7	465	6.865028	51.137556	2	174.5
URD1	2013	02-07	19-07	183	200	51.4	466	6.865028	51.137556	2	191.5
URD1	2013	20-07	26-07	201	207	14.3	467	6.865028	51.137556	2	204
URD1	2013	27-07	02-08	208	214	18.8	468	6.865028	51.137556	2	211
URD1	2013	03-08	10-08	215	222	18.9	469	6.865028	51.137556	2	218.5
URD1	2013	11-08	17-08	223	229	29.2	470	6.865028	51.137556	2	226
URD1	2013	18-08	24-08	230	236	9.8	471	6.865028	51.137556	2	233
URD1	2013	25-08	31-08	237	243	9.7	472	6.865028	51.137556	2	240
URD1	2013	01-09	05-09	244	248	8.4	473	6.865028	51.137556	2	246
URD1	2013	06-09	14-09	249	257	4.9	474	6.865028	51.137556	2	253
URD1	2013	15-09	28-09	258	271	1.7	475	6.865028	51.137556	2	264.5
URD1	2013	29-09	13-10	272	286	1.3	476	6.865028	51.137556	2	279
URD2	2013	10-04	04-05	100	124	17.1	477	6.879969	51.139682	2	112
URD2	2013	05-05	12-05	125	132	17.4	478	6.879969	51.139682	2	128.5
URD2	2013	13-05	21-05	133	141	14.1	479	6.879969	51.139682	2	137
URD2	2013	22-05	29-05	142	149	18.8	480	6.879969	51.139682	2	145.5
URD2	2013	30-05	08-06	150	159	19.2	481	6.879969	51.139682	2	154.5
URD2	2013	09-06	15-06	160	166	5.7	482	6.879969	51.139682	2	163
URD2	2013	16-06	01-07	167	182	20.7	483	6.879969	51.139682	2	174.5
URD2	2013	02-07	19-07	183	200	47.3	484	6.879969	51.139682	2	191.5
URD2	2013	20-07	26-07	201	207	22.5	485	6.879969	51.139682	2	204
URD2	2013	27-07	02-08	208	214	37.5	486	6.879969	51.139682	2	211
URD2	2013	03-08	10-08	215	222	27.4	487	6.879969	51.139682	2	218.5
URD2	2013	11-08	17-08	223	229	20.7	488	6.879969	51.139682	2	226
URD2	2013	18-08	24-08	230	236	9.3	489	6.879969	51.139682	2	233
URD2	2013	25-08	31-08	237	243	11.2	490	6.879969	51.139682	2	240
URD2	2013	01-09	05-09	244	248	9.1	491	6.879969	51.139682	2	246
URD2	2013	06-09	14-09	249	257	5.9	492	6.879969	51.139682	2	253
URD2	2013	15-09	28-09	258	271	2.1	493	6.879969	51.139682	2	264.5
URD2	2013	29-09	13-10	272	286	1.5	494	6.879969	51.139682	2	279
ORS1	2014	11-04	25-04	101	115	11.5	495	6.596584	51.567346	2	108
ORS1	2014	26-04	14-05	116	134	19	496	6.596584	51.567346	2	125
ORS1	2014	15-05	30-05	135	150	18.9	497	6.596584	51.567346	2	142.5
ORS1	2014	31-05	09-06	151	160	20.9	498	6.596584	51.567346	2	155.5
ORS1	2014	10-06	28-06	161	179	40	499	6.596584	51.567346	2	170
ORS1	2014	29-06	08-07	180	189	20.8	500	6.596584	51.567346	2	184.5
ORS1	2014	09-07	23-07	190	204	37.8	501	6.596584	51.567346	2	197
ORS1	2014	24-07	08-08	205	220	26.2	502	6.596584	51.567346	2	212.5
ORS1	2014	09-08	28-08	221	240	11.8	503	6.596584	51.567346	2	230.5
ORS1	2014	29-08	26-09	241	269	11.9	504	6.596584	51.567346	2	255
ORS1	2014	27-09	16-10	270	289	5.7	505	6.596584	51.567346	2	279.5
ORS1	2014	17-10	01-11	290	305	2.2	506	6.596584	51.567346	2	297.5
BIS3	2013	13-04	05-05	103	125	13.9	507	6.485721	51.651861	2	114
BIS3	2013	06-05	01-06	126	152	32.1	508	6.485721	51.651861	2	139
BIS3	2013	02-06	17-06	153	168	41	509	6.485721	51.651861	2	160.5
BIS3	2013	18-06	06-07	169	187	32.9	510	6.485721	51.651861	2	178
BIS3	2013	07-07	20-07	188	201	24.7	511	6.485721	51.651861	2	194.5
BIS3	2013	21-07	02-08	202	214	34.6	512	6.485721	51.651861	2	208
BIS3	2013	03-08	22-08	215	234	43.3	513	6.485721	51.651861	2	224.5
BIS3	2013	23-08	15-09	235	258	25.4	514	6.485721	51.651861	2	246.5
BIS5	2013	13-04	05-05	103	125	14.1	515	6.487056	51.644787	2	114
BIS5	2013	06-05	01-06	126	152	35.3	516	6.487056	51.644787	2	139
BIS5	2013	02-06	17-06	153	168	70.4	517	6.487056	51.644787	2	160.5
BIS5	2013	18-06	06-07	169	187	44	518	6.487056	51.644787	2	178
BIS5	2013	07-07	20-07	188	201	47.2	519	6.487056	51.644787	2	194.5
BIS5	2013	21-07	02-08	202	214	81.5	520	6.487056	51.644787	2	208
BIS5	2013	03-08	22-08	215	234	95.8	521	6.487056	51.644787	2	224.5
BIS5	2013	23-08	15-09	235	258	37.5	522	6.487056	51.644787	2	246.5
BIS6	2013	13-04	05-05	103	125	11.2	523	6.494824	51.635392	2	114
BIS6	2013	06-05	01-06	126	152	33.7	524	6.494824	51.635392	2	139
BIS6	2013	02-06	17-06	153	168	24.5	525	6.494824	51.635392	2	160.5
BIS6	2013	18-06	06-07	169	187	14.9	526	6.494824	51.635392	2	178
BIS6	2013	07-07	20-07	188	201	16.2	527	6.494824	51.635392	2	194.5
BIS6	2013	21-07	02-08	202	214	21.8	528	6.494824	51.635392	2	208
BIS6	2013	03-08	22-08	215	234	23.3	529	6.494824	51.635392	2	224.5
BIS6	2013	23-08	15-09	235	258	40.8	530	6.494824	51.635392	2	246.5
BIS7	2013	13-04	05-05	103	125	15.4	531	6.4987	51.639697	2	114
BIS7	2013	06-05	01-06	126	152	50.1	532	6.4987	51.639697	2	139
BIS7	2013	02-06	17-06	153	168	49.6	533	6.4987	51.639697	2	160.5
BIS7	2013	18-06	06-07	169	187	45.2	534	6.4987	51.639697	2	178
BIS7	2013	07-07	20-07	188	201	46.9	535	6.4987	51.639697	2	194.5
BIS7	2013	21-07	02-08	202	214	39	536	6.4987	51.639697	2	208
BIS7	2013	03-08	22-08	215	234	30.1	537	6.4987	51.639697	2	224.5
BIS7	2013	23-08	15-09	235	258	30.6	538	6.4987	51.639697	2	246.5
BIS3	2014	22-03	12-04	81	102	10.6	539	6.485721	51.651861	2	91.5
BIS3	2014	13-04	25-04	103	115	28.4	540	6.485721	51.651861	2	109
BIS3	2014	26-04	13-05	116	133	32.9	541	6.485721	51.651861	2	124.5
BIS3	2014	14-05	30-05	134	150	46.2	542	6.485721	51.651861	2	142
BIS3	2014	31-05	09-06	151	160	36.8	543	6.485721	51.651861	2	155.5
BIS3	2014	10-06	28-06	161	179	59.3	544	6.485721	51.651861	2	170
BIS3	2014	29-06	08-07	180	189	20.8	545	6.485721	51.651861	2	184.5
BIS3	2014	09-07	22-07	190	203	30	546	6.485721	51.651861	2	196.5
BIS3	2014	23-07	11-08	204	223	25.4	547	6.485721	51.651861	2	213.5
BIS3	2014	12-08	28-08	224	240	9.8	548	6.485721	51.651861	2	232
BIS3	2014	29-08	26-09	241	269	18.4	549	6.485721	51.651861	2	255
BIS3	2014	27-09	17-10	270	290	7	550	6.485721	51.651861	2	280
BIS8	2014	22-03	12-04	81	102	11.2	551	6.507335	51.659626	2	91.5
BIS8	2014	13-04	25-04	103	115	14.2	552	6.507335	51.659626	2	109
BIS8	2014	26-04	13-05	116	133	13.5	553	6.507335	51.659626	2	124.5
BIS8	2014	14-05	30-05	134	150	21.4	554	6.507335	51.659626	2	142
BIS8	2014	31-05	09-06	151	160	22.6	555	6.507335	51.659626	2	155.5
BIS8	2014	10-06	28-06	161	179	53	556	6.507335	51.659626	2	170
BIS8	2014	29-06	08-07	180	189	35.6	557	6.507335	51.659626	2	184.5
BIS8	2014	09-07	22-07	190	203	81.2	558	6.507335	51.659626	2	196.5
BIS8	2014	23-07	11-08	204	223	67.7	559	6.507335	51.659626	2	213.5
BIS8	2014	12-08	28-08	224	240	26.2	560	6.507335	51.659626	2	232
BIS8	2014	29-08	26-09	241	269	32.8	561	6.507335	51.659626	2	255
BIS8	2014	27-09	17-10	270	290	24.5	562	6.507335	51.659626	2	280
BIS9	2014	22-03	12-04	81	102	3.6	563	6.483046	51.643688	2	91.5
BIS9	2014	13-04	25-04	103	115	18.4	564	6.483046	51.643688	2	109
BIS9	2014	26-04	13-05	116	133	7.9	565	6.483046	51.643688	2	124.5
BIS9	2014	14-05	30-05	134	150	46.6	566	6.483046	51.643688	2	142
BIS9	2014	31-05	09-06	151	160	19.9	567	6.483046	51.643688	2	155.5
BIS9	2014	10-06	28-06	161	179	39.6	568	6.483046	51.643688	2	170
BIS9	2014	29-06	08-07	180	189	24.9	569	6.483046	51.643688	2	184.5
BIS9	2014	09-07	22-07	190	203	28.4	570	6.483046	51.643688	2	196.5
BIS9	2014	23-07	11-08	204	223	29.4	571	6.483046	51.643688	2	213.5
BIS9	2014	12-08	28-08	224	240	7.4	572	6.483046	51.643688	2	232
BIS9	2014	29-08	26-09	241	269	20.2	573	6.483046	51.643688	2	255
BIS9	2014	27-09	17-10	270	290	5.8	574	6.483046	51.643688	2	280
BIS10	2014	13-04	25-04	103	115	50	575	6.482997	51.642649	2	109
BIS10	2014	26-04	13-05	116	133	22.2	576	6.482997	51.642649	2	124.5
BIS10	2014	14-05	30-05	134	150	19.3	577	6.482997	51.642649	2	142
BIS10	2014	31-05	09-06	151	160	40.5	578	6.482997	51.642649	2	155.5
BIS10	2014	10-06	28-06	161	179	54	579	6.482997	51.642649	2	170
BIS10	2014	29-06	08-07	180	189	18.5	580	6.482997	51.642649	2	184.5
BIS10	2014	09-07	22-07	190	203	22.8	581	6.482997	51.642649	2	196.5
BIS10	2014	23-07	11-08	204	223	32.1	582	6.482997	51.642649	2	213.5
BIS10	2014	12-08	28-08	224	240	6.3	583	6.482997	51.642649	2	232
BIS10	2014	29-08	26-09	241	269	8	584	6.482997	51.642649	2	255
PLI1	2005	13-03	19-03	72	78	6	585	6.69861	51.650948	1	75
PLI1	2005	20-03	27-03	79	86	7.8	586	6.69861	51.650948	1	82.5
PLI1	2005	28-03	02-04	87	92	6.3	587	6.69861	51.650948	1	89.5
PLI1	2005	03-04	09-04	93	99	8.9	588	6.69861	51.650948	1	96
PLI1	2005	10-04	16-04	100	106	10.4	589	6.69861	51.650948	1	103
PLI1	2005	17-04	23-04	107	113	17.4	590	6.69861	51.650948	1	110
PLI1	2005	24-04	30-04	114	120	18.6	591	6.69861	51.650948	1	117
PLI1	2005	01-05	07-05	121	127	26.2	592	6.69861	51.650948	1	124
PLI1	2005	08-05	14-05	128	134	28.3	593	6.69861	51.650948	1	131
PLI1	2005	15-05	21-05	135	141	34.1	594	6.69861	51.650948	1	138
PLI1	2005	22-05	28-05	142	148	36	595	6.69861	51.650948	1	145
PLI1	2005	29-05	04-06	149	155	31.7	596	6.69861	51.650948	1	152
PLI1	2005	05-06	11-06	156	162	19.5	597	6.69861	51.650948	1	159
PLI1	2005	12-06	25-06	163	176	28.7	598	6.69861	51.650948	1	169.5
PLI1	2005	26-06	02-07	177	183	30.4	599	6.69861	51.650948	1	180
PLI1	2005	03-07	09-07	184	190	21.1	600	6.69861	51.650948	1	187
PLI1	2005	10-07	16-07	191	197	30.9	601	6.69861	51.650948	1	194
PLI1	2005	17-07	03-08	198	215	44.8	602	6.69861	51.650948	1	206.5
PLI1	2005	04-08	20-08	216	232	61.4	603	6.69861	51.650948	1	224
PLI1	2005	21-08	06-09	233	249	53.7	604	6.69861	51.650948	1	241
PLI1	2005	07-09	24-09	250	267	38.7	605	6.69861	51.650948	1	258.5
PLI1	2005	25-09	08-10	268	281	26.3	606	6.69861	51.650948	1	274.5
PLI1	2005	09-10	23-10	282	296	19.9	607	6.69861	51.650948	1	289
PLI2	2005	13-03	19-03	72	78	3.8	608	6.70088	51.650631	1	75
PLI2	2005	20-03	27-03	79	86	4.3	609	6.70088	51.650631	1	82.5
PLI2	2005	28-03	02-04	87	92	4.6	610	6.70088	51.650631	1	89.5
PLI2	2005	03-04	09-04	93	99	4.7	611	6.70088	51.650631	1	96
PLI2	2005	10-04	16-04	100	106	5.3	612	6.70088	51.650631	1	103
PLI2	2005	17-04	23-04	107	113	11.2	613	6.70088	51.650631	1	110
PLI2	2005	24-04	30-04	114	120	15.3	614	6.70088	51.650631	1	117
PLI2	2005	01-05	07-05	121	127	20.4	615	6.70088	51.650631	1	124
PLI2	2005	08-05	14-05	128	134	21.3	616	6.70088	51.650631	1	131
PLI2	2005	15-05	21-05	135	141	27.1	617	6.70088	51.650631	1	138
PLI2	2005	22-05	28-05	142	148	30.9	618	6.70088	51.650631	1	145
PLI2	2005	29-05	04-06	149	155	22.5	619	6.70088	51.650631	1	152
PLI2	2005	05-06	11-06	156	162	13.7	620	6.70088	51.650631	1	159
PLI2	2005	12-06	25-06	163	176	24.1	621	6.70088	51.650631	1	169.5
PLI2	2005	26-06	02-07	177	183	27.2	622	6.70088	51.650631	1	180
PLI2	2005	03-07	09-07	184	190	26.2	623	6.70088	51.650631	1	187
PLI2	2005	10-07	16-07	191	197	23.7	624	6.70088	51.650631	1	194
PLI2	2005	17-07	03-08	198	215	28.9	625	6.70088	51.650631	1	206.5
PLI2	2005	04-08	20-08	216	232	43.7	626	6.70088	51.650631	1	224
PLI2	2005	21-08	06-09	233	249	32.1	627	6.70088	51.650631	1	241
PLI2	2005	07-09	24-09	250	267	41	628	6.70088	51.650631	1	258.5
PLI2	2005	25-09	08-10	268	281	12.9	629	6.70088	51.650631	1	274.5
PLI2	2005	09-10	23-10	282	296	19.9	630	6.70088	51.650631	1	289
PLI1	2014	15-03	11-04	74	101	8.4	631	6.69861	51.650948	1	87.5
PLI1	2014	12-04	27-04	102	117	10.8	632	6.69861	51.650948	1	109.5
PLI1	2014	28-04	12-05	118	132	5.7	633	6.69861	51.650948	1	125
PLI1	2014	13-05	01-06	133	152	19.7	634	6.69861	51.650948	1	142.5
PLI1	2014	02-06	10-06	153	161	11	635	6.69861	51.650948	1	157
PLI1	2014	11-06	28-06	162	179	16	636	6.69861	51.650948	1	170.5
PLI1	2014	29-06	10-07	180	191	11.1	637	6.69861	51.650948	1	185.5
PLI1	2014	11-07	21-07	192	202	14	638	6.69861	51.650948	1	197
PLI1	2014	22-07	08-08	203	220	17.7	639	6.69861	51.650948	1	211.5
PLI1	2014	09-08	07-09	221	250	41.6	640	6.69861	51.650948	1	235.5
PLI1	2014	08-09	23-09	251	266	7.7	641	6.69861	51.650948	1	258.5
PLI1	2014	24-09	21-10	267	294	26.1	642	6.69861	51.650948	1	280.5
BOO1	1993	02-07	08-07	183	189	138.2	643	6.53234	51.383126	2	186
BOO1	1993	09-07	16-07	190	197	75.1	644	6.53234	51.383126	2	193.5
BOO1	1993	17-07	23-07	198	204	92.4	645	6.53234	51.383126	2	201
BOO1	1993	24-07	30-07	205	211	50.6	646	6.53234	51.383126	2	208
BOO1	1993	31-07	06-08	212	218	51.5	647	6.53234	51.383126	2	215
BOO1	1993	07-08	13-08	219	225	39.9	648	6.53234	51.383126	2	222
BOO1	1993	14-08	20-08	226	232	60	649	6.53234	51.383126	2	229
BOO1	1993	21-08	28-08	233	240	49.7	650	6.53234	51.383126	2	236.5
GEO1	1993	02-07	08-07	183	189	82.4	651	6.551231	51.367496	2	186
GEO1	1993	09-07	16-07	190	197	54.4	652	6.551231	51.367496	2	193.5
GEO1	1993	17-07	23-07	198	204	84.1	653	6.551231	51.367496	2	201
GEO1	1993	24-07	30-07	205	211	52.9	654	6.551231	51.367496	2	208
GEO1	1993	31-07	06-08	212	218	49.3	655	6.551231	51.367496	2	215
GEO1	1993	07-08	13-08	219	225	52.8	656	6.551231	51.367496	2	222
GEO1	1993	14-08	20-08	226	232	45	657	6.551231	51.367496	2	229
GEO1	1993	21-08	28-08	233	240	36.8	658	6.551231	51.367496	2	236.5
BOO1	2014	29-03	04-04	88	94	9.1	659	6.53234	51.383126	2	91
BOO1	2014	05-04	11-04	95	101	9.9	660	6.53234	51.383126	2	98
BOO1	2014	12-04	18-04	102	108	9	661	6.53234	51.383126	2	105
BOO1	2014	19-04	25-04	109	115	21.1	662	6.53234	51.383126	2	112
BOO1	2014	26-04	02-05	116	122	8.9	663	6.53234	51.383126	2	119
BOO1	2014	03-05	09-05	123	129	10	664	6.53234	51.383126	2	126
BOO1	2014	10-05	16-05	130	136	8.3	665	6.53234	51.383126	2	133
BOO1	2014	17-05	23-05	137	143	18.2	666	6.53234	51.383126	2	140
BOO1	2014	24-05	30-05	144	150	12.1	667	6.53234	51.383126	2	147
BOO1	2014	31-05	06-06	151	157	15.8	668	6.53234	51.383126	2	154
BOO1	2014	07-06	13-06	158	164	20.4	669	6.53234	51.383126	2	161
BOO1	2014	14-06	20-06	165	171	12.3	670	6.53234	51.383126	2	168
BOO1	2014	21-06	27-06	172	178	16	671	6.53234	51.383126	2	175
BOO1	2014	28-06	04-07	179	185	17.7	672	6.53234	51.383126	2	182
BOO1	2014	05-07	11-07	186	192	20.9	673	6.53234	51.383126	2	189
BOO1	2014	12-07	18-07	193	199	31.8	674	6.53234	51.383126	2	196
BOO1	2014	19-07	25-07	200	206	22.7	675	6.53234	51.383126	2	203
BOO1	2014	26-07	01-08	207	213	26.5	676	6.53234	51.383126	2	210
BOO1	2014	02-08	15-08	214	227	34.7	677	6.53234	51.383126	2	220.5
BOO1	2014	16-08	29-08	228	241	29.6	678	6.53234	51.383126	2	234.5
BOO1	2014	30-08	12-09	242	255	34.5	679	6.53234	51.383126	2	248.5
BOO1	2014	13-09	26-09	256	269	14.6	680	6.53234	51.383126	2	262.5
BOO1	2014	27-09	10-10	270	283	11.3	681	6.53234	51.383126	2	276.5
BOO1	2014	11-10	01-11	284	305	14.4	682	6.53234	51.383126	2	294.5
GEO1	2014	05-04	11-04	95	101	6.4	683	6.551231	51.367496	2	98
GEO1	2014	12-04	18-04	102	108	7	684	6.551231	51.367496	2	105
GEO1	2014	19-04	25-04	109	115	20.8	685	6.551231	51.367496	2	112
GEO1	2014	26-04	02-05	116	122	19.6	686	6.551231	51.367496	2	119
GEO1	2014	03-05	09-05	123	129	15.8	687	6.551231	51.367496	2	126
GEO1	2014	10-05	16-05	130	136	9.4	688	6.551231	51.367496	2	133
GEO1	2014	17-05	23-05	137	143	19.7	689	6.551231	51.367496	2	140
GEO1	2014	24-05	30-05	144	150	8.8	690	6.551231	51.367496	2	147
GEO1	2014	31-05	06-06	151	157	10.4	691	6.551231	51.367496	2	154
GEO1	2014	07-06	13-06	158	164	18	692	6.551231	51.367496	2	161
GEO1	2014	14-06	20-06	165	171	15.5	693	6.551231	51.367496	2	168
GEO1	2014	21-06	27-06	172	178	26.9	694	6.551231	51.367496	2	175
GEO1	2014	28-06	04-07	179	185	30.4	695	6.551231	51.367496	2	182
GEO1	2014	05-07	11-07	186	192	19.6	696	6.551231	51.367496	2	189
GEO1	2014	12-07	18-07	193	199	14.1	697	6.551231	51.367496	2	196
GEO1	2014	19-07	25-07	200	206	12.4	698	6.551231	51.367496	2	203
GEO1	2014	26-07	01-08	207	213	10.3	699	6.551231	51.367496	2	210
GEO1	2014	02-08	15-08	214	227	23.1	700	6.551231	51.367496	2	220.5
GEO1	2014	16-08	29-08	228	241	18.6	701	6.551231	51.367496	2	234.5
GEO1	2014	30-08	12-09	242	255	26.5	702	6.551231	51.367496	2	248.5
GEO1	2014	13-09	26-09	256	269	20.8	703	6.551231	51.367496	2	262.5
GEO1	2014	27-09	10-10	270	283	15.1	704	6.551231	51.367496	2	276.5
GEO1	2014	11-10	01-11	284	305	9.8	705	6.551231	51.367496	2	294.5
CAR1	1990	14-04	27-04	104	117	10.7	706	6.532718	51.391662	2	110.5
CAR1	1990	28-04	04-05	118	124	18.5	707	6.532718	51.391662	2	121
CAR1	1990	05-05	11-05	125	131	23.7	708	6.532718	51.391662	2	128
CAR1	1990	12-05	18-05	132	138	27.1	709	6.532718	51.391662	2	135
CAR1	1990	19-05	25-05	139	145	37.8	710	6.532718	51.391662	2	142
CAR1	1990	26-05	01-06	146	152	36	711	6.532718	51.391662	2	149
CAR1	1990	02-06	08-06	153	159	22.3	712	6.532718	51.391662	2	156
CAR1	1990	09-06	15-06	160	166	31.3	713	6.532718	51.391662	2	163
CAR1	1990	16-06	22-06	167	173	60.4	714	6.532718	51.391662	2	170
CAR1	1990	23-06	29-06	174	180	82.2	715	6.532718	51.391662	2	177
CAR1	1990	30-06	06-07	181	187	62.9	716	6.532718	51.391662	2	184
CAR1	1990	07-07	13-07	188	194	71.6	717	6.532718	51.391662	2	191
CAR1	1990	14-07	20-07	195	201	58.9	718	6.532718	51.391662	2	198
CAR1	1990	21-07	27-07	202	208	59.2	719	6.532718	51.391662	2	205
CAR1	1990	28-07	03-08	209	215	107.1	720	6.532718	51.391662	2	212
CAR1	1990	04-08	10-08	216	222	67.7	721	6.532718	51.391662	2	219
CAR1	1990	11-08	17-08	223	229	59.3	722	6.532718	51.391662	2	226
CAR1	1990	18-08	24-08	230	236	47.4	723	6.532718	51.391662	2	233
CAR1	1990	25-08	31-08	237	243	42.8	724	6.532718	51.391662	2	240
CAR1	1990	01-09	07-09	244	250	21.9	725	6.532718	51.391662	2	247
CAR1	1990	08-09	14-09	251	257	17.9	726	6.532718	51.391662	2	254
CAR1	1990	15-09	21-09	258	264	7.3	727	6.532718	51.391662	2	261
CAR1	1990	22-09	28-09	265	271	6.8	728	6.532718	51.391662	2	268
CAR1	1990	29-09	05-10	272	278	12.1	729	6.532718	51.391662	2	275
CAR1	1990	06-10	12-10	279	285	5.7	730	6.532718	51.391662	2	282
CAR1	1990	13-10	19-10	286	292	6.2	731	6.532718	51.391662	2	289
CAR1	1990	20-10	26-10	293	299	2.4	732	6.532718	51.391662	2	296
CAR1	1990	27-10	02-11	300	306	1.3	733	6.532718	51.391662	2	303
CAR1	1990	03-11	09-11	307	313	1.1	734	6.532718	51.391662	2	310
CAR1	1990	10-11	16-11	314	320	NA	735	6.532718	51.391662	2	317
CAR1	1990	17-11	23-11	321	327	3.5	736	6.532718	51.391662	2	324
CAR1	1990	24-11	30-11	328	334	0.6	737	6.532718	51.391662	2	331
CAR1	1990	01-12	07-12	335	341	0.4	738	6.532718	51.391662	2	338
CAR1	1990	08-12	14-12	342	348	0.3	739	6.532718	51.391662	2	345
CAR1	1990	15-12	22-12	349	356	0.1	740	6.532718	51.391662	2	352.5
ORB1	1989	01-05	07-05	121	127	42.6	741	6.506266	51.397132	2	124
ORB1	1989	08-05	13-05	128	133	38.6	742	6.506266	51.397132	2	130.5
ORB1	1989	14-05	20-05	134	140	64.3	743	6.506266	51.397132	2	137
ORB1	1989	21-05	10-06	141	161	NA	744	6.506266	51.397132	2	151
ORB1	1989	11-06	17-06	162	168	41.5	745	6.506266	51.397132	2	165
ORB1	1989	18-06	24-06	169	175	83.3	746	6.506266	51.397132	2	172
ORB1	1989	25-06	01-07	176	182	51	747	6.506266	51.397132	2	179
ORB1	1989	02-07	08-07	183	189	114.1	748	6.506266	51.397132	2	186
ORB1	1989	09-07	15-07	190	196	76.9	749	6.506266	51.397132	2	193
ORB1	1989	16-07	22-07	197	203	122.5	750	6.506266	51.397132	2	200
ORB1	1989	23-07	29-07	204	210	73.5	751	6.506266	51.397132	2	207
ORB1	1989	30-07	05-08	211	217	61.2	752	6.506266	51.397132	2	214
ORB1	1989	06-08	12-08	218	224	63.4	753	6.506266	51.397132	2	221
ORB1	1989	13-08	19-08	225	231	77.4	754	6.506266	51.397132	2	228
ORB1	1989	20-08	26-08	232	238	39.9	755	6.506266	51.397132	2	235
ORB1	1989	27-08	02-09	239	245	31.3	756	6.506266	51.397132	2	242
ORB1	1989	03-09	09-09	246	252	NA	757	6.506266	51.397132	2	249
ORB1	1989	10-09	16-09	253	259	11.2	758	6.506266	51.397132	2	256
ORB1	1989	17-09	23-09	260	266	9.9	759	6.506266	51.397132	2	263
ORB1	1989	24-09	30-09	267	273	16.5	760	6.506266	51.397132	2	270
ORB1	1989	01-10	07-10	274	280	12.1	761	6.506266	51.397132	2	277
ORB1	1989	08-10	14-10	281	287	8.6	762	6.506266	51.397132	2	284
ORB2	1989	01-05	07-05	121	127	26.5	763	6.504397	51.398707	2	124
ORB2	1989	08-05	13-05	128	133	36.2	764	6.504397	51.398707	2	130.5
ORB2	1989	14-05	20-05	134	140	101.4	765	6.504397	51.398707	2	137
ORB2	1989	21-05	27-05	141	147	98.3	766	6.504397	51.398707	2	144
ORB2	1989	28-05	03-06	148	154	60.1	767	6.504397	51.398707	2	151
ORB2	1989	04-06	10-06	155	161	68.3	768	6.504397	51.398707	2	158
ORB2	1989	11-06	17-06	162	168	79.5	769	6.504397	51.398707	2	165
ORB2	1989	18-06	24-06	169	175	129.8	770	6.504397	51.398707	2	172
ORB2	1989	25-06	01-07	176	182	91.4	771	6.504397	51.398707	2	179
ORB2	1989	02-07	08-07	183	189	137.5	772	6.504397	51.398707	2	186
ORB2	1989	09-07	15-07	190	196	94.6	773	6.504397	51.398707	2	193
ORB2	1989	16-07	22-07	197	203	145.4	774	6.504397	51.398707	2	200
ORB2	1989	23-07	29-07	204	210	83.3	775	6.504397	51.398707	2	207
ORB2	1989	30-07	05-08	211	217	49.1	776	6.504397	51.398707	2	214
ORB2	1989	06-08	12-08	218	224	40.3	777	6.504397	51.398707	2	221
ORB2	1989	13-08	19-08	225	231	63.7	778	6.504397	51.398707	2	228
ORB2	1989	20-08	26-08	232	238	34.5	779	6.504397	51.398707	2	235
ORB2	1989	27-08	02-09	239	245	26.6	780	6.504397	51.398707	2	242
ORB2	1989	03-09	09-09	246	252	15.3	781	6.504397	51.398707	2	249
ORB2	1989	10-09	16-09	253	259	11.9	782	6.504397	51.398707	2	256
ORB2	1989	17-09	23-09	260	266	8.8	783	6.504397	51.398707	2	263
ORB2	1989	24-09	30-09	267	273	6.7	784	6.504397	51.398707	2	270
ORB2	1989	01-10	07-10	274	280	10.5	785	6.504397	51.398707	2	277
ORB2	1989	08-10	14-10	281	287	5.9	786	6.504397	51.398707	2	284
ORB1	2013	14-04	20-04	104	110	1	787	6.506266	51.397132	2	107
ORB1	2013	21-04	27-04	111	117	2.4	788	6.506266	51.397132	2	114
ORB1	2013	28-04	04-05	118	124	5.7	789	6.506266	51.397132	2	121
ORB1	2013	05-05	11-05	125	131	5.2	790	6.506266	51.397132	2	128
ORB1	2013	12-05	18-05	132	138	4.8	791	6.506266	51.397132	2	135
ORB1	2013	19-05	25-05	139	145	7.2	792	6.506266	51.397132	2	142
ORB1	2013	26-05	01-06	146	152	16.1	793	6.506266	51.397132	2	149
ORB1	2013	02-06	08-06	153	159	18.9	794	6.506266	51.397132	2	156
ORB1	2013	09-06	15-06	160	166	12.6	795	6.506266	51.397132	2	163
ORB1	2013	16-06	22-06	167	173	13.8	796	6.506266	51.397132	2	170
ORB1	2013	23-06	29-06	174	180	8.2	797	6.506266	51.397132	2	177
ORB1	2013	30-06	06-07	181	187	19.2	798	6.506266	51.397132	2	184
ORB1	2013	07-07	13-07	188	194	18.9	799	6.506266	51.397132	2	191
ORB1	2013	14-07	20-07	195	201	22.1	800	6.506266	51.397132	2	198
ORB1	2013	21-07	27-07	202	208	19.7	801	6.506266	51.397132	2	205
ORB1	2013	28-07	03-08	209	215	27.3	802	6.506266	51.397132	2	212
ORB1	2013	04-08	10-08	216	222	13.6	803	6.506266	51.397132	2	219
ORB1	2013	11-08	17-08	223	229	14.3	804	6.506266	51.397132	2	226
ORB1	2013	18-08	24-08	230	236	10.1	805	6.506266	51.397132	2	233
ORB1	2013	25-08	31-08	237	243	5.6	806	6.506266	51.397132	2	240
ORB1	2013	01-09	07-09	244	250	4	807	6.506266	51.397132	2	247
ORB1	2013	08-09	14-09	251	257	2.1	808	6.506266	51.397132	2	254
ORB1	2013	15-09	21-09	258	264	1.8	809	6.506266	51.397132	2	261
ORB1	2013	22-09	28-09	265	271	2.7	810	6.506266	51.397132	2	268
ORB1	2013	29-09	05-10	272	278	2.1	811	6.506266	51.397132	2	275
ORB1	2013	06-10	12-10	279	285	1.3	812	6.506266	51.397132	2	282
ORB1	2013	13-10	19-10	286	292	2.8	813	6.506266	51.397132	2	289
ORB1	2013	20-10	26-10	293	299	6.4	814	6.506266	51.397132	2	296
ORB1	2013	27-10	02-11	300	306	1.1	815	6.506266	51.397132	2	303
ORB2	2013	14-04	20-04	104	110	2.4	816	6.504397	51.398707	2	107
ORB2	2013	21-04	27-04	111	117	4.3	817	6.504397	51.398707	2	114
ORB2	2013	28-04	04-05	118	124	9.1	818	6.504397	51.398707	2	121
ORB2	2013	05-05	11-05	125	131	11.4	819	6.504397	51.398707	2	128
ORB2	2013	12-05	18-05	132	138	10.5	820	6.504397	51.398707	2	135
ORB2	2013	19-05	25-05	139	145	11.5	821	6.504397	51.398707	2	142
ORB2	2013	26-05	01-06	146	152	13.9	822	6.504397	51.398707	2	149
ORB2	2013	02-06	08-06	153	159	18	823	6.504397	51.398707	2	156
ORB2	2013	09-06	15-06	160	166	22	824	6.504397	51.398707	2	163
ORB2	2013	16-06	22-06	167	173	20.7	825	6.504397	51.398707	2	170
ORB2	2013	23-06	29-06	174	180	8.5	826	6.504397	51.398707	2	177
ORB2	2013	30-06	06-07	181	187	17.8	827	6.504397	51.398707	2	184
ORB2	2013	07-07	13-07	188	194	16.4	828	6.504397	51.398707	2	191
ORB2	2013	14-07	20-07	195	201	22.1	829	6.504397	51.398707	2	198
ORB2	2013	21-07	27-07	202	208	21.2	830	6.504397	51.398707	2	205
ORB2	2013	28-07	03-08	209	215	30.5	831	6.504397	51.398707	2	212
ORB2	2013	04-08	10-08	216	222	17	832	6.504397	51.398707	2	219
ORB2	2013	11-08	17-08	223	229	11.5	833	6.504397	51.398707	2	226
ORB2	2013	18-08	24-08	230	236	12.3	834	6.504397	51.398707	2	233
ORB2	2013	25-08	31-08	237	243	4.1	835	6.504397	51.398707	2	240
ORB2	2013	01-09	07-09	244	250	3.5	836	6.504397	51.398707	2	247
ORB2	2013	08-09	14-09	251	257	3.4	837	6.504397	51.398707	2	254
ORB2	2013	15-09	21-09	258	264	2.7	838	6.504397	51.398707	2	261
ORB2	2013	22-09	28-09	265	271	2.6	839	6.504397	51.398707	2	268
ORB2	2013	29-09	05-10	272	278	2	840	6.504397	51.398707	2	275
ORB2	2013	06-10	12-10	279	285	1.7	841	6.504397	51.398707	2	282
ORB2	2013	13-10	19-10	286	292	5.9	842	6.504397	51.398707	2	289
ORB2	2013	20-10	26-10	293	299	10.9	843	6.504397	51.398707	2	296
ORB2	2013	27-10	02-11	300	306	2	844	6.504397	51.398707	2	303
ORB1	2014	29-03	04-04	88	94	11.6	845	6.506266	51.397132	2	91
ORB1	2014	05-04	11-04	95	101	5.4	846	6.506266	51.397132	2	98
ORB1	2014	12-04	18-04	102	108	5.2	847	6.506266	51.397132	2	105
ORB1	2014	19-04	25-04	109	115	14.9	848	6.506266	51.397132	2	112
ORB1	2014	26-04	02-05	116	122	12	849	6.506266	51.397132	2	119
ORB1	2014	03-05	09-05	123	129	9.2	850	6.506266	51.397132	2	126
ORB1	2014	10-05	16-05	130	136	10.3	851	6.506266	51.397132	2	133
ORB1	2014	17-05	23-05	137	143	21.1	852	6.506266	51.397132	2	140
ORB1	2014	24-05	30-05	144	150	17	853	6.506266	51.397132	2	147
ORB1	2014	31-05	06-06	151	157	18.5	854	6.506266	51.397132	2	154
ORB1	2014	07-06	13-06	158	164	23.4	855	6.506266	51.397132	2	161
ORB1	2014	14-06	20-06	165	171	17.9	856	6.506266	51.397132	2	168
ORB1	2014	21-06	27-06	172	178	24.9	857	6.506266	51.397132	2	175
ORB1	2014	28-06	04-07	179	185	21.2	858	6.506266	51.397132	2	182
ORB1	2014	05-07	11-07	186	192	24.2	859	6.506266	51.397132	2	189
ORB1	2014	12-07	18-07	193	199	23	860	6.506266	51.397132	2	196
ORB1	2014	19-07	25-07	200	206	19.4	861	6.506266	51.397132	2	203
ORB1	2014	26-07	01-08	207	213	23.8	862	6.506266	51.397132	2	210
ORB1	2014	02-08	15-08	214	227	36.3	863	6.506266	51.397132	2	220.5
ORB1	2014	16-08	29-08	228	241	21.4	864	6.506266	51.397132	2	234.5
ORB1	2014	30-08	12-09	242	255	23.1	865	6.506266	51.397132	2	248.5
ORB1	2014	13-09	26-09	256	269	18.5	866	6.506266	51.397132	2	262.5
ORB1	2014	27-09	10-10	270	283	13.9	867	6.506266	51.397132	2	276.5
ORB1	2014	11-10	01-11	284	305	12.8	868	6.506266	51.397132	2	294.5
ORB2	2014	29-03	04-04	88	94	8.6	869	6.504397	51.398707	2	91
ORB2	2014	05-04	11-04	95	101	8.3	870	6.504397	51.398707	2	98
ORB2	2014	12-04	18-04	102	108	6.1	871	6.504397	51.398707	2	105
ORB2	2014	19-04	25-04	109	115	13.3	872	6.504397	51.398707	2	112
ORB2	2014	26-04	02-05	116	122	7.9	873	6.504397	51.398707	2	119
ORB2	2014	03-05	09-05	123	129	15.9	874	6.504397	51.398707	2	126
ORB2	2014	10-05	16-05	130	136	8.2	875	6.504397	51.398707	2	133
ORB2	2014	17-05	23-05	137	143	17.6	876	6.504397	51.398707	2	140
ORB2	2014	24-05	30-05	144	150	5.8	877	6.504397	51.398707	2	147
ORB2	2014	31-05	06-06	151	157	20.4	878	6.504397	51.398707	2	154
ORB2	2014	07-06	13-06	158	164	28.6	879	6.504397	51.398707	2	161
ORB2	2014	14-06	20-06	165	171	16.5	880	6.504397	51.398707	2	168
ORB2	2014	21-06	27-06	172	178	18.9	881	6.504397	51.398707	2	175
ORB2	2014	28-06	04-07	179	185	15.5	882	6.504397	51.398707	2	182
ORB2	2014	05-07	11-07	186	192	20.4	883	6.504397	51.398707	2	189
ORB2	2014	12-07	18-07	193	199	12	884	6.504397	51.398707	2	196
ORB2	2014	19-07	25-07	200	206	9.7	885	6.504397	51.398707	2	203
ORB2	2014	26-07	01-08	207	213	6.7	886	6.504397	51.398707	2	210
ORB2	2014	02-08	15-08	214	227	13.9	887	6.504397	51.398707	2	220.5
ORB2	2014	16-08	29-08	228	241	5.1	888	6.504397	51.398707	2	234.5
ORB2	2014	30-08	12-09	242	255	6.9	889	6.504397	51.398707	2	248.5
ORB2	2014	13-09	26-09	256	269	5.5	890	6.504397	51.398707	2	262.5
ORB2	2014	27-09	10-10	270	283	5.3	891	6.504397	51.398707	2	276.5
ORB2	2014	11-10	01-11	284	305	11.9	892	6.504397	51.398707	2	294.5
SCH1	1992	08-06	13-06	159	164	66.3	893	6.469225	51.443969	3	161.5
SCH1	1992	14-06	04-07	165	185	NA	894	6.469225	51.443969	3	175
SCH1	1992	05-07	11-07	186	192	86.9	895	6.469225	51.443969	3	189
SCH1	1992	12-07	18-07	193	199	69	896	6.469225	51.443969	3	196
SCH1	1992	19-07	25-07	200	206	103.8	897	6.469225	51.443969	3	203
SCH1	1992	26-07	01-08	207	213	83.8	898	6.469225	51.443969	3	210
SCH1	1992	02-08	08-08	214	220	59.3	899	6.469225	51.443969	3	217
SCH1	1992	09-08	15-08	221	227	40.2	900	6.469225	51.443969	3	224
SCH1	1992	16-08	22-08	228	234	56.4	901	6.469225	51.443969	3	231
SCH1	1992	23-08	29-08	235	241	38.1	902	6.469225	51.443969	3	238
SCH1	1992	30-08	05-09	242	248	22.6	903	6.469225	51.443969	3	245
SCH1	1992	06-09	12-09	249	255	23.4	904	6.469225	51.443969	3	252
SCH1	1992	13-09	19-09	256	262	30	905	6.469225	51.443969	3	259
SCH1	1992	20-09	26-09	263	269	31.4	906	6.469225	51.443969	3	266
KAN1	1992	08-06	13-06	159	164	31.6	907	6.696231	51.628426	1	161.5
KAN1	1992	14-06	20-06	165	171	24.5	908	6.696231	51.628426	1	168
KAN1	1992	21-06	27-06	172	178	31.9	909	6.696231	51.628426	1	175
KAN1	1992	28-06	04-07	179	185	37.5	910	6.696231	51.628426	1	182
KAN1	1992	05-07	11-07	186	192	30.1	911	6.696231	51.628426	1	189
KAN1	1992	12-07	18-07	193	199	NA	912	6.696231	51.628426	1	196
KAN1	1992	19-07	25-07	200	206	51.8	913	6.696231	51.628426	1	203
KAN1	1992	26-07	01-08	207	213	49.2	914	6.696231	51.628426	1	210
KAN1	1992	02-08	08-08	214	220	43.1	915	6.696231	51.628426	1	217
KAN1	1992	09-08	15-08	221	227	22.9	916	6.696231	51.628426	1	224
KAN1	1992	16-08	22-08	228	234	36.8	917	6.696231	51.628426	1	231
KAN1	1992	23-08	29-08	235	241	26.8	918	6.696231	51.628426	1	238
KAN1	1992	30-08	05-09	242	248	9.6	919	6.696231	51.628426	1	245
KAN1	1992	06-09	12-09	249	255	16.4	920	6.696231	51.628426	1	252
KAN1	1992	13-09	19-09	256	262	10.7	921	6.696231	51.628426	1	259
KAN1	1992	20-09	26-09	263	269	14.3	922	6.696231	51.628426	1	266
KAN1	2001	07-04	13-04	97	103	6.1	923	6.696231	51.628426	1	100
KAN1	2001	14-04	21-04	104	111	3.1	924	6.696231	51.628426	1	107.5
KAN1	2001	22-04	28-04	112	118	9.3	925	6.696231	51.628426	1	115
KAN1	2001	29-04	05-05	119	125	14	926	6.696231	51.628426	1	122
KAN1	2001	06-05	12-05	126	132	22.7	927	6.696231	51.628426	1	129
KAN1	2001	13-05	19-05	133	139	19.9	928	6.696231	51.628426	1	136
KAN1	2001	20-05	26-05	140	146	17.8	929	6.696231	51.628426	1	143
KAN1	2001	27-05	03-06	147	154	27.7	930	6.696231	51.628426	1	150.5
KAN1	2001	04-06	09-06	155	160	4.9	931	6.696231	51.628426	1	157.5
KAN1	2001	10-06	16-06	161	167	15.9	932	6.696231	51.628426	1	164
KAN1	2001	17-06	23-06	168	174	22.1	933	6.696231	51.628426	1	171
KAN1	2001	24-06	30-06	175	181	19.8	934	6.696231	51.628426	1	178
KAN1	2001	01-07	07-07	182	188	15.9	935	6.696231	51.628426	1	185
KAN1	2001	08-07	14-07	189	195	12.1	936	6.696231	51.628426	1	192
KAN1	2001	15-07	21-07	196	202	21	937	6.696231	51.628426	1	199
KAN1	2001	22-07	28-07	203	209	26.1	938	6.696231	51.628426	1	206
KAN1	2001	29-07	04-08	210	216	22.1	939	6.696231	51.628426	1	213
KAN1	2001	05-08	11-08	217	223	18.7	940	6.696231	51.628426	1	220
KAN1	2001	12-08	18-08	224	230	26.2	941	6.696231	51.628426	1	227
KAN1	2001	19-08	25-08	231	237	26.4	942	6.696231	51.628426	1	234
KAN1	2001	26-08	01-09	238	244	12.5	943	6.696231	51.628426	1	241
KAN1	2001	02-09	08-09	245	251	9.1	944	6.696231	51.628426	1	248
KAN1	2001	09-09	15-09	252	258	11.4	945	6.696231	51.628426	1	255
KAN1	2001	16-09	22-09	259	265	9.1	946	6.696231	51.628426	1	262
KAN1	2001	23-09	29-09	266	272	12.7	947	6.696231	51.628426	1	269
KAN1	2001	30-09	06-10	273	279	13.8	948	6.696231	51.628426	1	276
KAN1	2001	07-10	13-10	280	286	8	949	6.696231	51.628426	1	283
KAN2	2001	07-04	13-04	97	103	11.2	950	6.697179	51.627065	1	100
KAN2	2001	14-04	21-04	104	111	8.2	951	6.697179	51.627065	1	107.5
KAN2	2001	22-04	28-04	112	118	11.4	952	6.697179	51.627065	1	115
KAN2	2001	29-04	05-05	119	125	31.5	953	6.697179	51.627065	1	122
KAN2	2001	06-05	12-05	126	132	40.6	954	6.697179	51.627065	1	129
KAN2	2001	13-05	19-05	133	139	23	955	6.697179	51.627065	1	136
KAN2	2001	20-05	26-05	140	146	12.3	956	6.697179	51.627065	1	143
KAN2	2001	27-05	03-06	147	154	22.7	957	6.697179	51.627065	1	150.5
KAN2	2001	04-06	09-06	155	160	6.2	958	6.697179	51.627065	1	157.5
KAN2	2001	10-06	16-06	161	167	15.7	959	6.697179	51.627065	1	164
KAN2	2001	17-06	23-06	168	174	21.9	960	6.697179	51.627065	1	171
KAN2	2001	24-06	30-06	175	181	20.7	961	6.697179	51.627065	1	178
KAN2	2001	01-07	07-07	182	188	24.5	962	6.697179	51.627065	1	185
KAN2	2001	08-07	14-07	189	195	13.4	963	6.697179	51.627065	1	192
KAN2	2001	15-07	21-07	196	202	21.8	964	6.697179	51.627065	1	199
KAN2	2001	22-07	28-07	203	209	26.9	965	6.697179	51.627065	1	206
KAN2	2001	29-07	04-08	210	216	23.2	966	6.697179	51.627065	1	213
KAN2	2001	05-08	11-08	217	223	12.3	967	6.697179	51.627065	1	220
KAN2	2001	12-08	18-08	224	230	30.1	968	6.697179	51.627065	1	227
KAN2	2001	19-08	25-08	231	237	29.8	969	6.697179	51.627065	1	234
KAN2	2001	26-08	01-09	238	244	15.2	970	6.697179	51.627065	1	241
KAN2	2001	02-09	08-09	245	251	10.2	971	6.697179	51.627065	1	248
KAN2	2001	09-09	15-09	252	258	13.9	972	6.697179	51.627065	1	255
KAN2	2001	16-09	22-09	259	265	11.1	973	6.697179	51.627065	1	262
KAN2	2001	23-09	29-09	266	272	20.2	974	6.697179	51.627065	1	269
KAN2	2001	30-09	06-10	273	279	22.4	975	6.697179	51.627065	1	276
KAN2	2001	07-10	13-10	280	286	7.9	976	6.697179	51.627065	1	283
KAN1	2014	15-03	11-04	74	101	2.8	977	6.696231	51.628426	1	87.5
KAN1	2014	12-04	27-04	102	117	4.6	978	6.696231	51.628426	1	109.5
KAN1	2014	28-04	12-05	118	132	4.5	979	6.696231	51.628426	1	125
KAN1	2014	13-05	01-06	133	152	12.4	980	6.696231	51.628426	1	142.5
KAN1	2014	02-06	10-06	153	161	9.5	981	6.696231	51.628426	1	157
KAN1	2014	11-06	28-06	162	179	12.2	982	6.696231	51.628426	1	170.5
KAN1	2014	29-06	10-07	180	191	12	983	6.696231	51.628426	1	185.5
KAN1	2014	11-07	21-07	192	202	9.8	984	6.696231	51.628426	1	197
KAN1	2014	22-07	08-08	203	220	13.4	985	6.696231	51.628426	1	211.5
KAN1	2014	09-08	07-09	221	250	10.6	986	6.696231	51.628426	1	235.5
KAN1	2014	08-09	26-09	251	269	6.9	987	6.696231	51.628426	1	260
KAN1	2014	27-09	21-10	270	294	19.2	988	6.696231	51.628426	1	282
WAH1	1989	23-05	28-05	143	148	59.8	989	7.317404	50.845846	2	145.5
WAH1	1989	29-05	05-06	149	156	14.4	990	7.317404	50.845846	2	152.5
WAH1	1989	06-06	12-06	157	163	37	991	7.317404	50.845846	2	160
WAH1	1989	13-06	19-06	164	170	53.2	992	7.317404	50.845846	2	167
WAH1	1989	20-06	26-06	171	177	50.9	993	7.317404	50.845846	2	174
WAH1	1989	27-06	03-07	178	184	33.2	994	7.317404	50.845846	2	181
WAH1	1989	04-07	10-07	185	191	72.1	995	7.317404	50.845846	2	188
WAH1	1989	11-07	17-07	192	198	45.3	996	7.317404	50.845846	2	195
WAH1	1989	18-07	23-07	199	204	96.4	997	7.317404	50.845846	2	201.5
WAH1	1989	24-07	31-07	205	212	108.4	998	7.317404	50.845846	2	208.5
WAH1	1989	01-08	06-08	213	218	85.2	999	7.317404	50.845846	2	215.5
WAH1	1989	07-08	14-08	219	226	89.3	1000	7.317404	50.845846	2	222.5
WAH1	1989	15-08	22-08	227	234	69.9	1001	7.317404	50.845846	2	230.5
WAH1	1989	23-08	28-08	235	240	26.9	1002	7.317404	50.845846	2	237.5
WAH1	1989	29-08	04-09	241	247	32	1003	7.317404	50.845846	2	244
WAH1	1989	05-09	11-09	248	254	27.3	1004	7.317404	50.845846	2	251
WAH1	1989	12-09	18-09	255	261	27	1005	7.317404	50.845846	2	258
WAH1	1989	19-09	25-09	262	268	9.9	1006	7.317404	50.845846	2	265
WAH1	1989	26-09	03-10	269	276	10.2	1007	7.317404	50.845846	2	272.5
WAH1	2014	21-03	05-04	80	95	14.5	1008	7.317404	50.845846	2	87.5
WAH1	2014	06-04	24-04	96	114	32.8	1009	7.317404	50.845846	2	105
WAH1	2014	25-04	13-05	115	133	45.1	1010	7.317404	50.845846	2	124
WAH1	2014	14-05	30-05	134	150	30.7	1011	7.317404	50.845846	2	142
WAH1	2014	31-05	10-06	151	161	29.6	1012	7.317404	50.845846	2	156
WAH1	2014	11-06	26-06	162	177	16.2	1013	7.317404	50.845846	2	169.5
WAH1	2014	27-06	10-07	178	191	30	1014	7.317404	50.845846	2	184.5
WAH1	2014	11-07	23-07	192	204	19.3	1015	7.317404	50.845846	2	198
WAH1	2014	24-07	07-08	205	219	8.1	1016	7.317404	50.845846	2	212
WAH1	2014	08-08	19-08	220	231	19.3	1017	7.317404	50.845846	2	225.5
WAH1	2014	20-08	03-09	232	246	40.2	1018	7.317404	50.845846	2	239
WAH1	2014	04-09	21-09	247	264	60.4	1019	7.317404	50.845846	2	255.5
WAH1	2014	22-09	23-10	265	296	69.1	1020	7.317404	50.845846	2	280.5
WAH2	1989	16-05	22-05	136	142	102.9	1021	7.318627	50.847139	2	139
WAH2	1989	23-05	28-05	143	148	71.5	1022	7.318627	50.847139	2	145.5
WAH2	1989	29-05	05-06	149	156	26.2	1023	7.318627	50.847139	2	152.5
WAH2	1989	06-06	12-06	157	163	61.1	1024	7.318627	50.847139	2	160
WAH2	1989	13-06	19-06	164	170	94.2	1025	7.318627	50.847139	2	167
WAH2	1989	20-06	26-06	171	177	96.5	1026	7.318627	50.847139	2	174
WAH2	1989	27-06	03-07	178	184	48.2	1027	7.318627	50.847139	2	181
WAH2	1989	04-07	10-07	185	191	111.7	1028	7.318627	50.847139	2	188
WAH2	1989	11-07	17-07	192	198	128	1029	7.318627	50.847139	2	195
WAH2	1989	18-07	23-07	199	204	131.5	1030	7.318627	50.847139	2	201.5
WAH2	1989	24-07	31-07	205	212	130.8	1031	7.318627	50.847139	2	208.5
WAH2	1989	01-08	06-08	213	218	76.5	1032	7.318627	50.847139	2	215.5
WAH2	1989	07-08	14-08	219	226	91.9	1033	7.318627	50.847139	2	222.5
WAH2	1989	15-08	22-08	227	234	90.1	1034	7.318627	50.847139	2	230.5
WAH2	1989	23-08	28-08	235	240	32.1	1035	7.318627	50.847139	2	237.5
WAH2	1989	29-08	04-09	241	247	45.9	1036	7.318627	50.847139	2	244
WAH2	1989	05-09	11-09	248	254	43.2	1037	7.318627	50.847139	2	251
WAH2	1989	12-09	18-09	255	261	46.7	1038	7.318627	50.847139	2	258
WAH2	1989	19-09	25-09	262	268	37.4	1039	7.318627	50.847139	2	265
WAH2	1989	26-09	03-10	269	276	40.6	1040	7.318627	50.847139	2	272.5
WAH2	2014	21-03	05-04	80	95	9	1041	7.318627	50.847139	2	87.5
WAH2	2014	06-04	24-04	96	114	14.4	1042	7.318627	50.847139	2	105
WAH2	2014	25-04	13-05	115	133	27.7	1043	7.318627	50.847139	2	124
WAH2	2014	14-05	30-05	134	150	26.6	1044	7.318627	50.847139	2	142
WAH2	2014	31-05	10-06	151	161	24.3	1045	7.318627	50.847139	2	156
WAH2	2014	11-06	26-06	162	177	28.4	1046	7.318627	50.847139	2	169.5
WAH2	2014	27-06	10-07	178	191	31.4	1047	7.318627	50.847139	2	184.5
WAH2	2014	11-07	23-07	192	204	13.2	1048	7.318627	50.847139	2	198
WAH2	2014	24-07	07-08	205	219	15.9	1049	7.318627	50.847139	2	212
WAH2	2014	08-08	19-08	220	231	4.7	1050	7.318627	50.847139	2	225.5
WAH2	2014	20-08	03-09	232	246	6.8	1051	7.318627	50.847139	2	239
WAH2	2014	04-09	21-09	247	264	11.7	1052	7.318627	50.847139	2	255.5
WAH2	2014	22-09	23-10	265	296	7.7	1053	7.318627	50.847139	2	280.5
WAH3	1989	16-05	22-05	136	142	79.7	1054	7.321581	50.851185	2	139
WAH3	1989	23-05	28-05	143	148	55	1055	7.321581	50.851185	2	145.5
WAH3	1989	29-05	05-06	149	156	20.8	1056	7.321581	50.851185	2	152.5
WAH3	1989	06-06	12-06	157	163	51.6	1057	7.321581	50.851185	2	160
WAH3	1989	13-06	19-06	164	170	64.6	1058	7.321581	50.851185	2	167
WAH3	1989	20-06	26-06	171	177	62.7	1059	7.321581	50.851185	2	174
WAH3	1989	27-06	03-07	178	184	35.9	1060	7.321581	50.851185	2	181
WAH3	1989	04-07	10-07	185	191	71.8	1061	7.321581	50.851185	2	188
WAH3	1989	11-07	17-07	192	198	34.9	1062	7.321581	50.851185	2	195
WAH3	1989	18-07	23-07	199	204	49.1	1063	7.321581	50.851185	2	201.5
WAH3	1989	24-07	31-07	205	212	65.5	1064	7.321581	50.851185	2	208.5
WAH3	1989	01-08	06-08	213	218	51.1	1065	7.321581	50.851185	2	215.5
WAH3	1989	07-08	14-08	219	226	66.2	1066	7.321581	50.851185	2	222.5
WAH3	1989	15-08	22-08	227	234	56.9	1067	7.321581	50.851185	2	230.5
WAH3	1989	23-08	28-08	235	240	26.8	1068	7.321581	50.851185	2	237.5
WAH3	1989	29-08	04-09	241	247	33.6	1069	7.321581	50.851185	2	244
WAH3	1989	05-09	11-09	248	254	31.1	1070	7.321581	50.851185	2	251
WAH3	1989	12-09	18-09	255	261	17.4	1071	7.321581	50.851185	2	258
WAH3	1989	19-09	25-09	262	268	10.6	1072	7.321581	50.851185	2	265
WAH3	1989	26-09	03-10	269	276	11.9	1073	7.321581	50.851185	2	272.5
WAH3	2014	21-03	05-04	80	95	7.2	1074	7.321581	50.851185	2	87.5
WAH3	2014	06-04	24-04	96	114	15	1075	7.321581	50.851185	2	105
WAH3	2014	25-04	13-05	115	133	19.5	1076	7.321581	50.851185	2	124
WAH3	2014	14-05	30-05	134	150	12.7	1077	7.321581	50.851185	2	142
WAH3	2014	31-05	10-06	151	161	7.2	1078	7.321581	50.851185	2	156
WAH3	2014	11-06	26-06	162	177	12.5	1079	7.321581	50.851185	2	169.5
WAH3	2014	27-06	10-07	178	191	36.5	1080	7.321581	50.851185	2	184.5
WAH3	2014	11-07	23-07	192	204	16.6	1081	7.321581	50.851185	2	198
WAH3	2014	24-07	07-08	205	219	31.7	1082	7.321581	50.851185	2	212
WAH3	2014	08-08	19-08	220	231	17.4	1083	7.321581	50.851185	2	225.5
WAH3	2014	20-08	03-09	232	246	30.2	1084	7.321581	50.851185	2	239
WAH3	2014	04-09	21-09	247	264	21.1	1085	7.321581	50.851185	2	255.5
WAH3	2014	22-09	23-10	265	296	11.1	1086	7.321581	50.851185	2	280.5
WAH4	1989	16-05	22-05	136	142	127.9	1087	7.348763	50.871877	2	139
WAH4	1989	23-05	28-05	143	148	87	1088	7.348763	50.871877	2	145.5
WAH4	1989	29-05	05-06	149	156	26.2	1089	7.348763	50.871877	2	152.5
WAH4	1989	06-06	12-06	157	163	56	1090	7.348763	50.871877	2	160
WAH4	1989	13-06	19-06	164	170	73.7	1091	7.348763	50.871877	2	167
WAH4	1989	20-06	26-06	171	177	66.8	1092	7.348763	50.871877	2	174
WAH4	1989	27-06	03-07	178	184	37.9	1093	7.348763	50.871877	2	181
WAH4	1989	04-07	10-07	185	191	73.3	1094	7.348763	50.871877	2	188
WAH4	1989	11-07	17-07	192	198	35.1	1095	7.348763	50.871877	2	195
WAH4	1989	18-07	23-07	199	204	71.4	1096	7.348763	50.871877	2	201.5
WAH4	1989	24-07	31-07	205	212	94.2	1097	7.348763	50.871877	2	208.5
WAH4	1989	01-08	06-08	213	218	84.6	1098	7.348763	50.871877	2	215.5
WAH4	1989	07-08	14-08	219	226	108.4	1099	7.348763	50.871877	2	222.5
WAH4	1989	15-08	22-08	227	234	114	1100	7.348763	50.871877	2	230.5
WAH4	1989	23-08	28-08	235	240	49.7	1101	7.348763	50.871877	2	237.5
WAH4	1989	29-08	04-09	241	247	92.8	1102	7.348763	50.871877	2	244
WAH4	1989	05-09	11-09	248	254	90.6	1103	7.348763	50.871877	2	251
WAH4	1989	12-09	18-09	255	261	65.6	1104	7.348763	50.871877	2	258
WAH4	1989	19-09	25-09	262	268	51.3	1105	7.348763	50.871877	2	265
WAH4	1989	26-09	03-10	269	276	21.4	1106	7.348763	50.871877	2	272.5
WAH4	2014	21-03	05-04	80	95	13.2	1107	7.348763	50.871877	2	87.5
WAH4	2014	06-04	24-04	96	114	32	1108	7.348763	50.871877	2	105
WAH4	2014	25-04	13-05	115	133	30.4	1109	7.348763	50.871877	2	124
WAH4	2014	14-05	30-05	134	150	20.5	1110	7.348763	50.871877	2	142
WAH4	2014	31-05	10-06	151	161	24.7	1111	7.348763	50.871877	2	156
WAH4	2014	11-06	26-06	162	177	28.3	1112	7.348763	50.871877	2	169.5
WAH4	2014	27-06	10-07	178	191	50.4	1113	7.348763	50.871877	2	184.5
WAH4	2014	11-07	23-07	192	204	10.3	1114	7.348763	50.871877	2	198
WAH4	2014	24-07	07-08	205	219	41.7	1115	7.348763	50.871877	2	212
WAH4	2014	08-08	19-08	220	231	23.1	1116	7.348763	50.871877	2	225.5
WAH4	2014	20-08	03-09	232	246	30.4	1117	7.348763	50.871877	2	239
WAH4	2014	04-09	21-09	247	264	61.4	1118	7.348763	50.871877	2	255.5
WAH4	2014	22-09	23-10	265	296	55.8	1119	7.348763	50.871877	2	280.5
WAH5	1989	16-05	22-05	136	142	96.3	1120	7.349266	50.87239	2	139
WAH5	1989	23-05	28-05	143	148	79.4	1121	7.349266	50.87239	2	145.5
WAH5	1989	29-05	05-06	149	156	20.2	1122	7.349266	50.87239	2	152.5
WAH5	1989	06-06	12-06	157	163	38.7	1123	7.349266	50.87239	2	160
WAH5	1989	13-06	19-06	164	170	58.2	1124	7.349266	50.87239	2	167
WAH5	1989	20-06	26-06	171	177	54.6	1125	7.349266	50.87239	2	174
WAH5	1989	27-06	03-07	178	184	28.2	1126	7.349266	50.87239	2	181
WAH5	1989	04-07	10-07	185	191	75.2	1127	7.349266	50.87239	2	188
WAH5	1989	11-07	17-07	192	198	56.6	1128	7.349266	50.87239	2	195
WAH5	1989	18-07	23-07	199	204	56.7	1129	7.349266	50.87239	2	201.5
WAH5	1989	24-07	31-07	205	212	78.3	1130	7.349266	50.87239	2	208.5
WAH5	1989	01-08	06-08	213	218	63	1131	7.349266	50.87239	2	215.5
WAH5	1989	07-08	14-08	219	226	90.6	1132	7.349266	50.87239	2	222.5
WAH5	1989	15-08	22-08	227	234	85.4	1133	7.349266	50.87239	2	230.5
WAH5	1989	23-08	28-08	235	240	25.1	1134	7.349266	50.87239	2	237.5
WAH5	1989	29-08	04-09	241	247	36.8	1135	7.349266	50.87239	2	244
WAH5	1989	05-09	11-09	248	254	32.6	1136	7.349266	50.87239	2	251
WAH5	1989	12-09	18-09	255	261	19.2	1137	7.349266	50.87239	2	258
WAH5	1989	19-09	25-09	262	268	10.3	1138	7.349266	50.87239	2	265
WAH5	1989	26-09	03-10	269	276	13.4	1139	7.349266	50.87239	2	272.5
WAH5	2014	21-03	05-04	80	95	10	1140	7.349266	50.87239	2	87.5
WAH5	2014	06-04	24-04	96	114	16.4	1141	7.349266	50.87239	2	105
WAH5	2014	25-04	13-05	115	133	26.4	1142	7.349266	50.87239	2	124
WAH5	2014	14-05	30-05	134	150	12.8	1143	7.349266	50.87239	2	142
WAH5	2014	31-05	10-06	151	161	12.6	1144	7.349266	50.87239	2	156
WAH5	2014	11-06	26-06	162	177	11.5	1145	7.349266	50.87239	2	169.5
WAH5	2014	27-06	10-07	178	191	27.8	1146	7.349266	50.87239	2	184.5
WAH5	2014	11-07	23-07	192	204	9.4	1147	7.349266	50.87239	2	198
WAH5	2014	24-07	07-08	205	219	24.3	1148	7.349266	50.87239	2	212
WAH5	2014	08-08	19-08	220	231	5.6	1149	7.349266	50.87239	2	225.5
WAH5	2014	20-08	03-09	232	246	5.1	1150	7.349266	50.87239	2	239
WAH5	2014	04-09	21-09	247	264	9.6	1151	7.349266	50.87239	2	255.5
WAH5	2014	22-09	23-10	265	296	5.2	1152	7.349266	50.87239	2	280.5
WAH6	1989	16-05	22-05	136	142	110.2	1153	7.334687	50.851605	2	139
WAH6	1989	23-05	28-05	143	148	79.5	1154	7.334687	50.851605	2	145.5
WAH6	1989	29-05	05-06	149	156	NA	1155	7.334687	50.851605	2	152.5
WAH6	1989	06-06	12-06	157	163	81.2	1156	7.334687	50.851605	2	160
WAH6	1989	13-06	19-06	164	170	108.4	1157	7.334687	50.851605	2	167
WAH6	1989	20-06	26-06	171	177	89.9	1158	7.334687	50.851605	2	174
WAH6	1989	27-06	03-07	178	184	50.2	1159	7.334687	50.851605	2	181
WAH6	1989	04-07	10-07	185	191	92.1	1160	7.334687	50.851605	2	188
WAH6	1989	11-07	17-07	192	198	69.9	1161	7.334687	50.851605	2	195
WAH6	1989	18-07	23-07	199	204	144.1	1162	7.334687	50.851605	2	201.5
WAH6	1989	24-07	31-07	205	212	207.8	1163	7.334687	50.851605	2	208.5
WAH6	1989	01-08	06-08	213	218	117.8	1164	7.334687	50.851605	2	215.5
WAH6	1989	07-08	14-08	219	226	75.6	1165	7.334687	50.851605	2	222.5
WAH6	1989	15-08	22-08	227	234	65.5	1166	7.334687	50.851605	2	230.5
WAH6	1989	23-08	28-08	235	240	32.5	1167	7.334687	50.851605	2	237.5
WAH6	1989	29-08	04-09	241	247	32	1168	7.334687	50.851605	2	244
WAH6	1989	05-09	11-09	248	254	38.5	1169	7.334687	50.851605	2	251
WAH6	1989	12-09	18-09	255	261	24.3	1170	7.334687	50.851605	2	258
WAH6	1989	19-09	25-09	262	268	12.6	1171	7.334687	50.851605	2	265
WAH6	1989	26-09	03-10	269	276	19.5	1172	7.334687	50.851605	2	272.5
WAH6	2014	06-04	24-04	96	114	25.7	1173	7.334687	50.851605	2	105
WAH6	2014	25-04	13-05	115	133	34.7	1174	7.334687	50.851605	2	124
WAH6	2014	14-05	30-05	134	150	0.3	1175	7.334687	50.851605	2	142
WAH6	2014	31-05	10-06	151	161	1.2	1176	7.334687	50.851605	2	156
WAH6	2014	11-06	26-06	162	177	5.7	1177	7.334687	50.851605	2	169.5
WAH6	2014	27-06	10-07	178	191	26.3	1178	7.334687	50.851605	2	184.5
WAH6	2014	11-07	23-07	192	204	13.6	1179	7.334687	50.851605	2	198
WAH6	2014	24-07	07-08	205	219	13.4	1180	7.334687	50.851605	2	212
WAH6	2014	08-08	19-08	220	231	16.1	1181	7.334687	50.851605	2	225.5
WAH6	2014	20-08	03-09	232	246	22.1	1182	7.334687	50.851605	2	239
WAH6	2014	04-09	21-09	247	264	40.5	1183	7.334687	50.851605	2	255.5
WAH6	2014	22-09	23-10	265	296	56	1184	7.334687	50.851605	2	280.5
BIS2	2004	11-04	17-04	101	107	24.2	1185	6.493301	51.64372	2	104
BIS2	2004	18-04	01-05	108	121	59.6	1186	6.493301	51.64372	2	114.5
BIS2	2004	02-05	15-05	122	135	55.2	1187	6.493301	51.64372	2	128.5
BIS2	2004	16-05	22-05	136	142	46.1	1188	6.493301	51.64372	2	139
BIS2	2004	23-05	29-05	143	149	31.7	1189	6.493301	51.64372	2	146
BIS2	2004	30-05	05-06	150	156	34.5	1190	6.493301	51.64372	2	153
BIS2	2004	06-06	12-06	157	163	48.3	1191	6.493301	51.64372	2	160
BIS2	2004	13-06	19-06	164	170	73.4	1192	6.493301	51.64372	2	167
BIS2	2004	20-06	26-06	171	177	48.8	1193	6.493301	51.64372	2	174
BIS2	2004	27-06	03-07	178	184	49.3	1194	6.493301	51.64372	2	181
BIS2	2004	04-07	10-07	185	191	56.9	1195	6.493301	51.64372	2	188
BIS2	2004	11-07	17-07	192	198	49.7	1196	6.493301	51.64372	2	195
BIS2	2004	18-07	24-07	199	205	74.7	1197	6.493301	51.64372	2	202
BIS2	2004	25-07	31-07	206	212	76.7	1198	6.493301	51.64372	2	209
BIS2	2004	01-08	07-08	213	219	88.9	1199	6.493301	51.64372	2	216
BIS2	2004	08-08	14-08	220	226	63.1	1200	6.493301	51.64372	2	223
BIS2	2004	15-08	21-08	227	233	57	1201	6.493301	51.64372	2	230
BIS2	2004	22-08	28-08	234	240	40	1202	6.493301	51.64372	2	237
BIS2	2004	29-08	04-09	241	247	29.9	1203	6.493301	51.64372	2	244
BIS2	2004	05-09	11-09	248	254	27.5	1204	6.493301	51.64372	2	251
BIS2	2004	12-09	18-09	255	261	26.3	1205	6.493301	51.64372	2	258
BIS2	2004	19-09	25-09	262	268	16.4	1206	6.493301	51.64372	2	265
BIS2	2004	26-09	02-10	269	275	16	1207	6.493301	51.64372	2	272
BIS2	2004	03-10	09-10	276	282	11.1	1208	6.493301	51.64372	2	279
BIS2	2004	10-10	23-10	283	296	17.2	1209	6.493301	51.64372	2	289.5
BIS2	2014	22-03	12-04	81	102	12.2	1210	6.493301	51.64372	2	91.5
BIS2	2014	13-04	28-04	103	118	24.9	1211	6.493301	51.64372	2	110.5
BIS2	2014	29-04	13-05	119	133	17.5	1212	6.493301	51.64372	2	126
BIS2	2014	14-05	30-05	134	150	21.9	1213	6.493301	51.64372	2	142
BIS2	2014	31-05	09-06	151	160	17.5	1214	6.493301	51.64372	2	155.5
BIS2	2014	10-06	28-06	161	179	37.7	1215	6.493301	51.64372	2	170
BIS2	2014	29-06	08-07	180	189	15.3	1216	6.493301	51.64372	2	184.5
BIS2	2014	09-07	22-07	190	203	24.2	1217	6.493301	51.64372	2	196.5
BIS2	2014	23-07	11-08	204	223	22.6	1218	6.493301	51.64372	2	213.5
BIS2	2014	12-08	28-08	224	240	9.3	1219	6.493301	51.64372	2	232
BIS2	2014	29-08	26-09	241	269	14.2	1220	6.493301	51.64372	2	255
BIS2	2014	27-09	16-10	270	289	8.9	1221	6.493301	51.64372	2	279.5
BIS2	2014	17-10	26-10	290	299	1.5	1222	6.493301	51.64372	2	294.5
BIS1	2003	16-03	29-03	75	88	9.9	1223	6.483285	51.64659	2	81.5
BIS1	2003	30-03	12-04	89	102	6.8	1224	6.483285	51.64659	2	95.5
BIS1	2003	13-04	26-04	103	116	37.4	1225	6.483285	51.64659	2	109.5
BIS1	2003	27-04	10-05	117	130	20.6	1226	6.483285	51.64659	2	123.5
BIS1	2003	11-05	24-05	131	144	61.7	1227	6.483285	51.64659	2	137.5
BIS1	2003	25-05	31-05	145	151	96.9	1228	6.483285	51.64659	2	148
BIS1	2003	01-06	07-06	152	158	110.4	1229	6.483285	51.64659	2	155
BIS1	2003	08-06	21-06	159	172	101.3	1230	6.483285	51.64659	2	165.5
BIS1	2003	22-06	29-06	173	180	62.4	1231	6.483285	51.64659	2	176.5
BIS1	2003	30-06	05-07	181	186	41.9	1232	6.483285	51.64659	2	183.5
BIS1	2003	06-07	12-07	187	193	80.1	1233	6.483285	51.64659	2	190
BIS1	2003	13-07	19-07	194	200	109.1	1234	6.483285	51.64659	2	197
BIS1	2003	20-07	26-07	201	207	65.3	1235	6.483285	51.64659	2	204
BIS1	2003	27-07	02-08	208	214	52.5	1236	6.483285	51.64659	2	211
BIS1	2003	03-08	09-08	215	221	62.5	1237	6.483285	51.64659	2	218
BIS1	2003	10-08	16-08	222	228	71.4	1238	6.483285	51.64659	2	225
BIS1	2003	17-08	23-08	229	235	31.2	1239	6.483285	51.64659	2	232
BIS1	2003	24-08	30-08	236	242	57.1	1240	6.483285	51.64659	2	239
BIS1	2003	31-08	06-09	243	249	26.8	1241	6.483285	51.64659	2	246
BIS1	2003	07-09	13-09	250	256	43.7	1242	6.483285	51.64659	2	253
BIS1	2003	14-09	20-09	257	263	34	1243	6.483285	51.64659	2	260
BIS1	2003	21-09	27-09	264	270	23.8	1244	6.483285	51.64659	2	267
BIS1	2003	28-09	04-10	271	277	16.2	1245	6.483285	51.64659	2	274
BIS1	2003	05-10	11-10	278	284	9.8	1246	6.483285	51.64659	2	281
BIS1	2014	22-03	12-04	81	102	14.8	1247	6.483285	51.64659	2	91.5
BIS1	2014	13-04	25-04	103	115	39.7	1248	6.483285	51.64659	2	109
BIS1	2014	26-04	13-05	116	133	20.3	1249	6.483285	51.64659	2	124.5
BIS1	2014	14-05	30-05	134	150	35	1250	6.483285	51.64659	2	142
BIS1	2014	31-05	09-06	151	160	35.7	1251	6.483285	51.64659	2	155.5
BIS1	2014	10-06	28-06	161	179	45.1	1252	6.483285	51.64659	2	170
BIS1	2014	29-06	08-07	180	189	23.9	1253	6.483285	51.64659	2	184.5
BIS1	2014	09-07	22-07	190	203	53	1254	6.483285	51.64659	2	196.5
BIS1	2014	23-07	11-08	204	223	41.3	1255	6.483285	51.64659	2	213.5
BIS1	2014	12-08	28-08	224	240	16.3	1256	6.483285	51.64659	2	232
BIS1	2014	29-08	26-09	241	269	35.7	1257	6.483285	51.64659	2	255
BIS1	2014	27-09	16-10	270	289	12.5	1258	6.483285	51.64659	2	279.5
BIS1	2014	17-10	25-10	290	298	1.8	1259	6.483285	51.64659	2	294
BIR1	1995	21-03	27-03	80	86	3.2	1260	6.466032	51.62895	2	83
BIR1	1995	28-03	03-04	87	93	6.8	1261	6.466032	51.62895	2	90
BIR1	1995	04-04	10-04	94	100	4.1	1262	6.466032	51.62895	2	97
BIR1	1995	11-04	17-04	101	107	7.9	1263	6.466032	51.62895	2	104
BIR1	1995	18-04	24-04	108	114	14.9	1264	6.466032	51.62895	2	111
BIR1	1995	25-04	01-05	115	121	18.6	1265	6.466032	51.62895	2	118
BIR1	1995	02-05	08-05	122	128	42.9	1266	6.466032	51.62895	2	125
BIR1	1995	09-05	15-05	129	135	15.3	1267	6.466032	51.62895	2	132
BIR1	1995	16-05	22-05	136	142	18.8	1268	6.466032	51.62895	2	139
BIR1	1995	23-05	29-05	143	149	40.1	1269	6.466032	51.62895	2	146
BIR1	1995	30-05	05-06	150	156	25.4	1270	6.466032	51.62895	2	153
BIR1	1995	06-06	12-06	157	163	22.9	1271	6.466032	51.62895	2	160
BIR1	1995	13-06	19-06	164	170	24	1272	6.466032	51.62895	2	167
BIR1	1995	20-06	26-06	171	177	45.5	1273	6.466032	51.62895	2	174
BIR1	1995	27-06	03-07	178	184	61.7	1274	6.466032	51.62895	2	181
BIR1	1995	04-07	10-07	185	191	76	1275	6.466032	51.62895	2	188
BIR1	1995	11-07	17-07	192	198	46.2	1276	6.466032	51.62895	2	195
BIR1	1995	18-07	24-07	199	205	57.1	1277	6.466032	51.62895	2	202
BIR1	1995	25-07	31-07	206	212	63.8	1278	6.466032	51.62895	2	209
BIR1	1995	01-08	07-08	213	219	56.3	1279	6.466032	51.62895	2	216
BIR1	1995	08-08	14-08	220	226	58.5	1280	6.466032	51.62895	2	223
BIR1	1995	15-08	21-08	227	233	51.4	1281	6.466032	51.62895	2	230
BIR1	1995	22-08	28-08	234	240	36.2	1282	6.466032	51.62895	2	237
BIR1	1995	29-08	04-09	241	247	31.9	1283	6.466032	51.62895	2	244
BIR1	1995	05-09	11-09	248	254	24.3	1284	6.466032	51.62895	2	251
BIR1	1995	12-09	18-09	255	261	19.3	1285	6.466032	51.62895	2	258
BIR1	1995	19-09	25-09	262	268	15.6	1286	6.466032	51.62895	2	265
BIR1	1995	26-09	03-10	269	276	9.9	1287	6.466032	51.62895	2	272.5
BIR1	1995	04-10	09-10	277	282	9.2	1288	6.466032	51.62895	2	279.5
BIR1	1995	10-10	16-10	283	289	6.8	1289	6.466032	51.62895	2	286
BIR1	2014	05-04	12-04	95	102	12.6	1290	6.466032	51.62895	2	98.5
BIR1	2014	13-04	25-04	103	115	32.7	1291	6.466032	51.62895	2	109
BIR1	2014	26-04	14-05	116	134	31.6	1292	6.466032	51.62895	2	125
BIR1	2014	15-05	30-05	135	150	26.1	1293	6.466032	51.62895	2	142.5
BIR1	2014	31-05	09-06	151	160	23.3	1294	6.466032	51.62895	2	155.5
BIR1	2014	10-06	28-06	161	179	64.6	1295	6.466032	51.62895	2	170
BIR1	2014	29-06	08-07	180	189	31.9	1296	6.466032	51.62895	2	184.5
BIR1	2014	09-07	23-07	190	204	49.5	1297	6.466032	51.62895	2	197
BIR1	2014	24-07	09-08	205	221	28.1	1298	6.466032	51.62895	2	213
BIR1	2014	10-08	28-08	222	240	22.6	1299	6.466032	51.62895	2	231
BIR1	2014	29-08	26-09	241	269	23.1	1300	6.466032	51.62895	2	255
BIR1	2014	27-09	17-10	270	290	9.3	1301	6.466032	51.62895	2	280
BIR1	2014	18-10	25-10	291	298	1.8	1302	6.466032	51.62895	2	294.5
BIR1	2014	26-10	03-11	299	307	7.9	1303	6.466032	51.62895	2	303
LAT1	1999	21-03	27-03	80	86	1.2	1304	6.652363	51.313709	2	83
LAT1	1999	28-03	03-04	87	93	16.9	1305	6.652363	51.313709	2	90
LAT1	1999	04-04	10-04	94	100	10.7	1306	6.652363	51.313709	2	97
LAT1	1999	11-04	17-04	101	107	5.3	1307	6.652363	51.313709	2	104
LAT1	1999	18-04	24-04	108	114	11.4	1308	6.652363	51.313709	2	111
LAT1	1999	25-04	01-05	115	121	32.1	1309	6.652363	51.313709	2	118
LAT1	1999	02-05	08-05	122	128	28.9	1310	6.652363	51.313709	2	125
LAT1	1999	09-05	15-05	129	135	24.4	1311	6.652363	51.313709	2	132
LAT1	1999	16-05	22-05	136	142	38	1312	6.652363	51.313709	2	139
LAT1	1999	23-05	29-05	143	149	29.6	1313	6.652363	51.313709	2	146
LAT1	1999	30-05	05-06	150	156	27.2	1314	6.652363	51.313709	2	153
LAT1	1999	06-06	12-06	157	163	46.8	1315	6.652363	51.313709	2	160
LAT1	1999	13-06	19-06	164	170	70.7	1316	6.652363	51.313709	2	167
LAT1	1999	20-06	26-06	171	177	53.2	1317	6.652363	51.313709	2	174
LAT1	1999	27-06	03-07	178	184	49.3	1318	6.652363	51.313709	2	181
LAT1	1999	04-07	10-07	185	191	62.1	1319	6.652363	51.313709	2	188
LAT1	1999	11-07	17-07	192	198	87.2	1320	6.652363	51.313709	2	195
LAT1	1999	18-07	24-07	199	205	73.6	1321	6.652363	51.313709	2	202
LAT1	1999	25-07	31-07	206	212	139.5	1322	6.652363	51.313709	2	209
LAT1	1999	01-08	07-08	213	219	76.5	1323	6.652363	51.313709	2	216
LAT1	1999	08-08	14-08	220	226	37.4	1324	6.652363	51.313709	2	223
LAT1	1999	15-08	21-08	227	233	29.9	1325	6.652363	51.313709	2	230
LAT1	1999	22-08	28-08	234	240	37.4	1326	6.652363	51.313709	2	237
LAT1	1999	29-08	04-09	241	247	27.1	1327	6.652363	51.313709	2	244
LAT1	1999	05-09	11-09	248	254	19.8	1328	6.652363	51.313709	2	251
LAT1	1999	12-09	18-09	255	261	8.9	1329	6.652363	51.313709	2	258
LAT1	1999	19-09	25-09	262	268	12	1330	6.652363	51.313709	2	265
LAT1	1999	26-09	02-10	269	275	6.2	1331	6.652363	51.313709	2	272
LAT2	1999	21-03	27-03	80	86	1.4	1332	6.671591	51.321067	2	83
LAT2	1999	28-03	03-04	87	93	11.7	1333	6.671591	51.321067	2	90
LAT2	1999	04-04	10-04	94	100	10.9	1334	6.671591	51.321067	2	97
LAT2	1999	11-04	17-04	101	107	4.9	1335	6.671591	51.321067	2	104
LAT2	1999	18-04	24-04	108	114	18.9	1336	6.671591	51.321067	2	111
LAT2	1999	25-04	01-05	115	121	36.7	1337	6.671591	51.321067	2	118
LAT2	1999	02-05	08-05	122	128	50.2	1338	6.671591	51.321067	2	125
LAT2	1999	09-05	15-05	129	135	27.5	1339	6.671591	51.321067	2	132
LAT2	1999	16-05	22-05	136	142	55.6	1340	6.671591	51.321067	2	139
LAT2	1999	23-05	29-05	143	149	59.9	1341	6.671591	51.321067	2	146
LAT2	1999	30-05	05-06	150	156	42.1	1342	6.671591	51.321067	2	153
LAT2	1999	06-06	12-06	157	163	48.1	1343	6.671591	51.321067	2	160
LAT2	1999	13-06	19-06	164	170	112.3	1344	6.671591	51.321067	2	167
LAT2	1999	20-06	26-06	171	177	74.1	1345	6.671591	51.321067	2	174
LAT2	1999	27-06	03-07	178	184	70.5	1346	6.671591	51.321067	2	181
LAT2	1999	04-07	10-07	185	191	77.6	1347	6.671591	51.321067	2	188
LAT2	1999	11-07	17-07	192	198	102.6	1348	6.671591	51.321067	2	195
LAT2	1999	18-07	24-07	199	205	92	1349	6.671591	51.321067	2	202
LAT2	1999	25-07	31-07	206	212	116.7	1350	6.671591	51.321067	2	209
LAT2	1999	01-08	07-08	213	219	93.2	1351	6.671591	51.321067	2	216
LAT2	1999	08-08	14-08	220	226	54.2	1352	6.671591	51.321067	2	223
LAT2	1999	15-08	21-08	227	233	37	1353	6.671591	51.321067	2	230
LAT2	1999	22-08	28-08	234	240	53.3	1354	6.671591	51.321067	2	237
LAT2	1999	29-08	04-09	241	247	52.1	1355	6.671591	51.321067	2	244
LAT2	1999	05-09	11-09	248	254	35.5	1356	6.671591	51.321067	2	251
LAT2	1999	12-09	18-09	255	261	16.1	1357	6.671591	51.321067	2	258
LAT2	1999	19-09	25-09	262	268	23.2	1358	6.671591	51.321067	2	265
LAT2	1999	26-09	02-10	269	275	9.8	1359	6.671591	51.321067	2	272
LAT1	2014	02-04	04-04	92	94	3.4	1360	6.652363	51.313709	2	93
LAT1	2014	05-04	11-04	95	101	8.1	1361	6.652363	51.313709	2	98
LAT1	2014	12-04	18-04	102	108	8.6	1362	6.652363	51.313709	2	105
LAT1	2014	19-04	25-04	109	115	23.9	1363	6.652363	51.313709	2	112
LAT1	2014	26-04	02-05	116	122	15.3	1364	6.652363	51.313709	2	119
LAT1	2014	03-05	09-05	123	129	16.6	1365	6.652363	51.313709	2	126
LAT1	2014	10-05	16-05	130	136	10.9	1366	6.652363	51.313709	2	133
LAT1	2014	17-05	23-05	137	143	21	1367	6.652363	51.313709	2	140
LAT1	2014	24-05	30-05	144	150	6.7	1368	6.652363	51.313709	2	147
LAT1	2014	31-05	06-06	151	157	24	1369	6.652363	51.313709	2	154
LAT1	2014	07-06	13-06	158	164	26.7	1370	6.652363	51.313709	2	161
LAT1	2014	14-06	20-06	165	171	21.8	1371	6.652363	51.313709	2	168
LAT1	2014	21-06	27-06	172	178	26.1	1372	6.652363	51.313709	2	175
LAT1	2014	28-06	04-07	179	185	30.6	1373	6.652363	51.313709	2	182
LAT1	2014	05-07	11-07	186	192	16.9	1374	6.652363	51.313709	2	189
LAT1	2014	12-07	26-07	193	207	49.9	1375	6.652363	51.313709	2	200
LAT1	2014	27-07	09-08	208	221	34.5	1376	6.652363	51.313709	2	214.5
LAT1	2014	10-08	20-08	222	232	19.5	1377	6.652363	51.313709	2	227
LAT1	2014	21-08	19-09	233	262	51	1378	6.652363	51.313709	2	247.5
LAT1	2014	20-09	17-10	263	290	11.9	1379	6.652363	51.313709	2	276.5
LAT1	2014	18-10	30-10	291	303	5	1380	6.652363	51.313709	2	297
LOO1	1992	08-06	13-06	159	164	41.6	1381	6.779626	51.669417	1	161.5
LOO1	1992	14-06	20-06	165	171	37.7	1382	6.779626	51.669417	1	168
LOO1	1992	21-06	27-06	172	178	45.9	1383	6.779626	51.669417	1	175
LOO1	1992	28-06	04-07	179	185	46.4	1384	6.779626	51.669417	1	182
LOO1	1992	05-07	11-07	186	192	73.3	1385	6.779626	51.669417	1	189
LOO1	1992	12-07	18-07	193	199	56.6	1386	6.779626	51.669417	1	196
LOO1	1992	19-07	25-07	200	206	70.4	1387	6.779626	51.669417	1	203
LOO1	1992	26-07	01-08	207	213	46.6	1388	6.779626	51.669417	1	210
LOO1	1992	02-08	08-08	214	220	43.7	1389	6.779626	51.669417	1	217
LOO1	1992	09-08	15-08	221	227	25.7	1390	6.779626	51.669417	1	224
LOO1	1992	16-08	22-08	228	234	30.7	1391	6.779626	51.669417	1	231
LOO1	1992	23-08	29-08	235	241	22.1	1392	6.779626	51.669417	1	238
LOO1	1992	30-08	05-09	242	248	10.2	1393	6.779626	51.669417	1	245
LOO1	1992	06-09	12-09	249	255	14.9	1394	6.779626	51.669417	1	252
LOO1	1992	13-09	19-09	256	262	10.4	1395	6.779626	51.669417	1	259
LOO1	1992	20-09	26-09	263	269	18	1396	6.779626	51.669417	1	266
LOO1	2001	07-04	13-04	97	103	13.1	1397	6.779626	51.669417	1	100
LOO1	2001	14-04	21-04	104	111	7.3	1398	6.779626	51.669417	1	107.5
LOO1	2001	22-04	28-04	112	118	9.5	1399	6.779626	51.669417	1	115
LOO1	2001	29-04	05-05	119	125	30.9	1400	6.779626	51.669417	1	122
LOO1	2001	06-05	12-05	126	132	38.1	1401	6.779626	51.669417	1	129
LOO1	2001	13-05	19-05	133	139	22.8	1402	6.779626	51.669417	1	136
LOO1	2001	20-05	26-05	140	146	12.4	1403	6.779626	51.669417	1	143
LOO1	2001	27-05	03-06	147	154	16.2	1404	6.779626	51.669417	1	150.5
LOO1	2001	04-06	09-06	155	160	12.1	1405	6.779626	51.669417	1	157.5
LOO1	2001	10-06	16-06	161	167	20.1	1406	6.779626	51.669417	1	164
LOO1	2001	17-06	23-06	168	174	33.7	1407	6.779626	51.669417	1	171
LOO1	2001	24-06	30-06	175	181	28.2	1408	6.779626	51.669417	1	178
LOO1	2001	01-07	07-07	182	188	23.9	1409	6.779626	51.669417	1	185
LOO1	2001	08-07	14-07	189	195	23.8	1410	6.779626	51.669417	1	192
LOO1	2001	15-07	21-07	196	202	20.4	1411	6.779626	51.669417	1	199
LOO1	2001	22-07	28-07	203	209	26.2	1412	6.779626	51.669417	1	206
LOO1	2001	29-07	04-08	210	216	30.4	1413	6.779626	51.669417	1	213
LOO1	2001	05-08	11-08	217	223	19.2	1414	6.779626	51.669417	1	220
LOO1	2001	12-08	18-08	224	230	18.6	1415	6.779626	51.669417	1	227
LOO1	2001	19-08	25-08	231	237	14.7	1416	6.779626	51.669417	1	234
LOO1	2001	26-08	01-09	238	244	10.7	1417	6.779626	51.669417	1	241
LOO1	2001	02-09	08-09	245	251	8.7	1418	6.779626	51.669417	1	248
LOO1	2001	09-09	15-09	252	258	9.3	1419	6.779626	51.669417	1	255
LOO1	2001	16-09	22-09	259	265	6.3	1420	6.779626	51.669417	1	262
LOO1	2001	23-09	29-09	266	272	12.4	1421	6.779626	51.669417	1	269
LOO1	2001	30-09	06-10	273	279	10.7	1422	6.779626	51.669417	1	276
LOO1	2001	07-10	13-10	280	286	6.4	1423	6.779626	51.669417	1	283
LOO1	2014	15-03	11-04	74	101	9	1424	6.779626	51.669417	1	87.5
LOO1	2014	12-04	27-04	102	117	8.7	1425	6.779626	51.669417	1	109.5
LOO1	2014	28-04	12-05	118	132	4.7	1426	6.779626	51.669417	1	125
LOO1	2014	13-05	01-06	133	152	10	1427	6.779626	51.669417	1	142.5
LOO1	2014	02-06	10-06	153	161	7.2	1428	6.779626	51.669417	1	157
LOO1	2014	11-06	28-06	162	179	11.8	1429	6.779626	51.669417	1	170.5
LOO1	2014	29-06	10-07	180	191	7.1	1430	6.779626	51.669417	1	185.5
LOO1	2014	11-07	21-07	192	202	14.1	1431	6.779626	51.669417	1	197
LOO1	2014	22-07	08-08	203	220	18.6	1432	6.779626	51.669417	1	211.5
LOO1	2014	09-08	07-09	221	250	27.1	1433	6.779626	51.669417	1	235.5
LOO1	2014	08-09	23-09	251	266	11.5	1434	6.779626	51.669417	1	258.5
LOO1	2014	24-09	21-10	267	294	23.3	1435	6.779626	51.669417	1	280.5
SPE1	1990	07-04	15-04	97	105	16.4	1436	6.703692	51.335317	2	101
SPE1	1990	16-04	21-04	106	111	31.3	1437	6.703692	51.335317	2	108.5
SPE1	1990	22-04	28-04	112	118	40.4	1438	6.703692	51.335317	2	115
SPE1	1990	29-04	05-05	119	125	31	1439	6.703692	51.335317	2	122
SPE1	1990	06-05	11-05	126	131	51.3	1440	6.703692	51.335317	2	128.5
SPE1	1990	12-05	18-05	132	138	51.9	1441	6.703692	51.335317	2	135
SPE1	1990	19-05	01-06	139	152	51.5	1442	6.703692	51.335317	2	145.5
SPE1	1990	02-06	08-06	153	159	37.8	1443	6.703692	51.335317	2	156
SPE1	1990	09-06	15-06	160	166	33.2	1444	6.703692	51.335317	2	163
SPE1	1990	16-06	23-06	167	174	61.9	1445	6.703692	51.335317	2	170.5
SPE1	1990	24-06	30-06	175	181	92	1446	6.703692	51.335317	2	178
SPE1	1990	01-07	07-07	182	188	43.8	1447	6.703692	51.335317	2	185
SPE1	1990	08-07	14-07	189	195	89.7	1448	6.703692	51.335317	2	192
SPE1	1990	15-07	21-07	196	202	62.6	1449	6.703692	51.335317	2	199
SPE1	1990	22-07	28-07	203	209	78.1	1450	6.703692	51.335317	2	206
SPE1	1990	29-07	04-08	210	216	84.5	1451	6.703692	51.335317	2	213
SPE1	1990	05-08	11-08	217	223	94.7	1452	6.703692	51.335317	2	220
SPE1	1990	12-08	18-08	224	230	79.9	1453	6.703692	51.335317	2	227
SPE1	1990	19-08	25-08	231	237	68.8	1454	6.703692	51.335317	2	234
SPE1	1990	26-08	01-09	238	244	46.3	1455	6.703692	51.335317	2	241
SPE1	1990	02-09	08-09	245	251	31.7	1456	6.703692	51.335317	2	248
SPE1	1990	09-09	15-09	252	258	34	1457	6.703692	51.335317	2	255
SPE1	1990	16-09	22-09	259	265	19.4	1458	6.703692	51.335317	2	262
SPE1	1990	23-09	29-09	266	272	25.6	1459	6.703692	51.335317	2	269
SPE1	1990	30-09	06-10	273	279	35.8	1460	6.703692	51.335317	2	276
SPE1	1990	07-10	13-10	280	286	33.1	1461	6.703692	51.335317	2	283
SPE1	1990	14-10	20-10	287	293	27.5	1462	6.703692	51.335317	2	290
SPE1	1990	21-10	27-10	294	300	13.6	1463	6.703692	51.335317	2	297
SPE1	2003	30-03	05-04	89	95	1.9	1464	6.703692	51.335317	2	92
SPE1	2003	06-04	12-04	96	102	8.1	1465	6.703692	51.335317	2	99
SPE1	2003	13-04	20-04	103	110	42.1	1466	6.703692	51.335317	2	106.5
SPE1	2003	21-04	26-04	111	116	53	1467	6.703692	51.335317	2	113.5
SPE1	2003	27-04	03-05	117	123	48.7	1468	6.703692	51.335317	2	120
SPE1	2003	04-05	10-05	124	130	53.9	1469	6.703692	51.335317	2	127
SPE1	2003	11-05	17-05	131	137	32.9	1470	6.703692	51.335317	2	134
SPE1	2003	18-05	24-05	138	144	30.1	1471	6.703692	51.335317	2	141
SPE1	2003	25-05	31-05	145	151	57.3	1472	6.703692	51.335317	2	148
SPE1	2003	01-06	07-06	152	158	80.4	1473	6.703692	51.335317	2	155
SPE1	2003	08-06	14-06	159	165	108	1474	6.703692	51.335317	2	162
SPE1	2003	15-06	21-06	166	172	94.6	1475	6.703692	51.335317	2	169
SPE1	2003	22-06	28-06	173	179	79.5	1476	6.703692	51.335317	2	176
SPE1	2003	29-06	05-07	180	186	62.8	1477	6.703692	51.335317	2	183
SPE1	2003	06-07	12-07	187	193	73.2	1478	6.703692	51.335317	2	190
SPE1	2003	13-07	19-07	194	200	72.2	1479	6.703692	51.335317	2	197
SPE1	2003	20-07	26-07	201	207	58.9	1480	6.703692	51.335317	2	204
SPE1	2003	27-07	02-08	208	214	60	1481	6.703692	51.335317	2	211
SPE1	2003	03-08	09-08	215	221	74.9	1482	6.703692	51.335317	2	218
SPE1	2003	10-08	16-08	222	228	44.3	1483	6.703692	51.335317	2	225
SPE1	2003	17-08	23-08	229	235	35.6	1484	6.703692	51.335317	2	232
SPE1	2003	24-08	30-08	236	242	20.7	1485	6.703692	51.335317	2	239
SPE1	2003	31-08	06-09	243	249	44	1486	6.703692	51.335317	2	246
SPE1	2003	07-09	13-09	250	256	17.2	1487	6.703692	51.335317	2	253
SPE1	2003	14-09	20-09	257	263	20.1	1488	6.703692	51.335317	2	260
SPE1	2003	21-09	27-09	264	270	14.9	1489	6.703692	51.335317	2	267
SPE1	2003	28-09	04-10	271	277	8.9	1490	6.703692	51.335317	2	274
SPE1	2003	05-10	11-10	278	284	7.4	1491	6.703692	51.335317	2	281
SPE1	2014	29-03	04-04	88	94	8.4	1492	6.703692	51.335317	2	91
SPE1	2014	05-04	11-04	95	101	6.7	1493	6.703692	51.335317	2	98
SPE1	2014	12-04	18-04	102	108	6.9	1494	6.703692	51.335317	2	105
SPE1	2014	19-04	25-04	109	115	10.8	1495	6.703692	51.335317	2	112
SPE1	2014	26-04	02-05	116	122	6.9	1496	6.703692	51.335317	2	119
SPE1	2014	03-05	09-05	123	129	16.1	1497	6.703692	51.335317	2	126
SPE1	2014	10-05	16-05	130	136	16	1498	6.703692	51.335317	2	133
SPE1	2014	17-05	23-05	137	143	35.9	1499	6.703692	51.335317	2	140
SPE1	2014	24-05	30-05	144	150	25.4	1500	6.703692	51.335317	2	147
SPE1	2014	31-05	06-06	151	157	26.5	1501	6.703692	51.335317	2	154
SPE1	2014	07-06	13-06	158	164	33.2	1502	6.703692	51.335317	2	161
SPE1	2014	14-06	20-06	165	171	31.3	1503	6.703692	51.335317	2	168
SPE1	2014	21-06	27-06	172	178	32.4	1504	6.703692	51.335317	2	175
SPE1	2014	28-06	04-07	179	185	37.2	1505	6.703692	51.335317	2	182
SPE1	2014	05-07	11-07	186	192	19.4	1506	6.703692	51.335317	2	189
SPE1	2014	12-07	26-07	193	207	47.9	1507	6.703692	51.335317	2	200
SPE1	2014	27-07	09-08	208	221	25.6	1508	6.703692	51.335317	2	214.5
SPE1	2014	10-08	20-08	222	232	11.2	1509	6.703692	51.335317	2	227
SPE1	2014	21-08	20-09	233	263	17	1510	6.703692	51.335317	2	248
SPE1	2014	21-09	17-10	264	290	10.7	1511	6.703692	51.335317	2	277
SPE1	2014	18-10	29-10	291	302	12.6	1512	6.703692	51.335317	2	296.5
