# Supplementary material for: More than 75 percent decline over 27 years in total flying insect biomass in protected areas
Source: PLoS One. 2017 Oct 18;12(10):e0185809. doi: 10.1371/journal.pone.0185809 (PMC5646769; doi:10.1371/journal.pone.0185809)
Supplement: S2 Dataset — (CSV) [file pone.0185809.s005.csv]

potID	plot	daynr	year	temperature	precipitation	wind.speed	frostdays	sum.precW	nHerbs	nTrees	Nitrogen	pH	Moisture	Light	ellenTemperature	Arable.land	Forest	Grassland	Water
1	SLL1	186	2011	18.7591723590674	0	1.44562033033903	39	293.361415563147	41	0	5.68	5.19	5.05	7.38	5.26	0.490641307523576	0.208590118595734	0.132709251523815	0.0131380392182385
1	SLL1	187	2011	19.0406841319235	0.725106208233996	3.10869801920659	39	293.361415563147	41	0	5.68	5.19	5.05	7.38	5.26	0.490641307523576	0.208590118595734	0.132709251523815	0.0131380392182385
1	SLL1	188	2011	19.4171475196419	0.0307432773986638	2.41115541289705	39	293.361415563147	41	0	5.68	5.19	5.05	7.38	5.26	0.490641307523576	0.208590118595734	0.132709251523815	0.0131380392182385
1	SLL1	189	2011	19.1700665862222	0.452579447134424	3.60856295125917	39	293.361415563147	41	0	5.68	5.19	5.05	7.38	5.26	0.490641307523576	0.208590118595734	0.132709251523815	0.0131380392182385
1	SLL1	190	2011	18.6606437545919	0.663213382508797	3.52709131329318	39	293.361415563147	41	0	5.68	5.19	5.05	7.38	5.26	0.490641307523576	0.208590118595734	0.132709251523815	0.0131380392182385
1	SLL1	191	2011	18.5382050382555	0	1.77444043001178	39	293.361415563147	41	0	5.68	5.19	5.05	7.38	5.26	0.490641307523576	0.208590118595734	0.132709251523815	0.0131380392182385
1	SLL1	192	2011	19.3102218304193	0	1.62235312560067	39	293.361415563147	41	0	5.68	5.19	5.05	7.38	5.26	0.490641307523576	0.208590118595734	0.132709251523815	0.0131380392182385
1	SLL1	193	2011	21.3202483168159	4.51871503163371	2.70188956269111	39	293.361415563147	41	0	5.68	5.19	5.05	7.38	5.26	0.490641307523576	0.208590118595734	0.132709251523815	0.0131380392182385
1	SLL1	194	2011	14.4793928854682	2.06050610694523	3.40715563527929	39	293.361415563147	41	0	5.68	5.19	5.05	7.38	5.26	0.490641307523576	0.208590118595734	0.132709251523815	0.0131380392182385
1	SLL1	195	2011	13.5269229318839	9.48468866132913	6.73522881818121	39	293.361415563147	41	0	5.68	5.19	5.05	7.38	5.26	0.490641307523576	0.208590118595734	0.132709251523815	0.0131380392182385
1	SLL1	196	2011	17.0088687023013	0.10369138723584	4.22379279065967	39	293.361415563147	41	0	5.68	5.19	5.05	7.38	5.26	0.490641307523576	0.208590118595734	0.132709251523815	0.0131380392182385
1	SLL1	197	2011	18.6469923886401	20.9564584666663	3.8752484116007	39	293.361415563147	41	0	5.68	5.19	5.05	7.38	5.26	0.490641307523576	0.208590118595734	0.132709251523815	0.0131380392182385
1	SLL1	198	2011	17.1912327949133	0.402538139247118	4.5155193175238	39	293.361415563147	41	0	5.68	5.19	5.05	7.38	5.26	0.490641307523576	0.208590118595734	0.132709251523815	0.0131380392182385
1	SLL1	199	2011	16.4576154870455	0	4.76696778372739	39	293.361415563147	41	0	5.68	5.19	5.05	7.38	5.26	0.490641307523576	0.208590118595734	0.132709251523815	0.0131380392182385
1	SLL1	200	2011	17.486082689952	0.402667869594024	2.28497430450875	39	293.361415563147	41	0	5.68	5.19	5.05	7.38	5.26	0.490641307523576	0.208590118595734	0.132709251523815	0.0131380392182385
1	SLL1	201	2011	17.2252327297908	1.60567121904483	2.09027444358518	39	293.361415563147	41	0	5.68	5.19	5.05	7.38	5.26	0.490641307523576	0.208590118595734	0.132709251523815	0.0131380392182385
1	SLL1	202	2011	16.7057215399295	4.97354792751148	2.2085594912584	39	293.361415563147	41	0	5.68	5.19	5.05	7.38	5.26	0.490641307523576	0.208590118595734	0.132709251523815	0.0131380392182385
1	SLL1	203	2011	14.9746979503663	0	3.90641408027131	39	293.361415563147	41	0	5.68	5.19	5.05	7.38	5.26	0.490641307523576	0.208590118595734	0.132709251523815	0.0131380392182385
1	SLL1	204	2011	13.6687121776867	12.07771023118	4.54156318559124	39	293.361415563147	41	0	5.68	5.19	5.05	7.38	5.26	0.490641307523576	0.208590118595734	0.132709251523815	0.0131380392182385
1	SLL1	205	2011	11.8936632528414	16.4229771644772	4.61838707251397	39	293.361415563147	41	0	5.68	5.19	5.05	7.38	5.26	0.490641307523576	0.208590118595734	0.132709251523815	0.0131380392182385
1	SLL1	206	2011	15.6630391555301	0.97747132354112	1.98853681512457	39	293.361415563147	41	0	5.68	5.19	5.05	7.38	5.26	0.490641307523576	0.208590118595734	0.132709251523815	0.0131380392182385
1	SLL1	207	2011	15.5942912218498	2.22718923008233	1.48184175115939	39	293.361415563147	41	0	5.68	5.19	5.05	7.38	5.26	0.490641307523576	0.208590118595734	0.132709251523815	0.0131380392182385
1	SLL1	208	2011	16.99238553884	15.3480117579989	1.33989936075886	39	293.361415563147	41	0	5.68	5.19	5.05	7.38	5.26	0.490641307523576	0.208590118595734	0.132709251523815	0.0131380392182385
2	SLL1	209	2011	18.4021673344494	0.159943883002199	1.56270058798678	39	293.361415563147	41	0	5.68	5.19	5.05	7.38	5.26	0.490641307523576	0.208590118595734	0.132709251523815	0.0131380392182385
2	SLL1	210	2011	16.5075574977259	0.0595979777179281	3.00507450038059	39	293.361415563147	41	0	5.68	5.19	5.05	7.38	5.26	0.490641307523576	0.208590118595734	0.132709251523815	0.0131380392182385
2	SLL1	211	2011	14.673512695941	0.206390729955378	3.3621669690438	39	293.361415563147	41	0	5.68	5.19	5.05	7.38	5.26	0.490641307523576	0.208590118595734	0.132709251523815	0.0131380392182385
2	SLL1	212	2011	14.9600394528505	0	2.10931312080747	39	293.361415563147	41	0	5.68	5.19	5.05	7.38	5.26	0.490641307523576	0.208590118595734	0.132709251523815	0.0131380392182385
2	SLL1	213	2011	17.7450741233751	0	1.59189589485688	39	293.361415563147	41	0	5.68	5.19	5.05	7.38	5.26	0.490641307523576	0.208590118595734	0.132709251523815	0.0131380392182385
2	SLL1	214	2011	22.6456153070497	0.0151043658825663	2.32797567925443	39	293.361415563147	41	0	5.68	5.19	5.05	7.38	5.26	0.490641307523576	0.208590118595734	0.132709251523815	0.0131380392182385
2	SLL1	215	2011	20.5260668163998	2.47144941019988	2.46556532208583	39	293.361415563147	41	0	5.68	5.19	5.05	7.38	5.26	0.490641307523576	0.208590118595734	0.132709251523815	0.0131380392182385
2	SLL1	216	2011	20.9239004899617	3.57045496724242	2.6250264250461	39	293.361415563147	41	0	5.68	5.19	5.05	7.38	5.26	0.490641307523576	0.208590118595734	0.132709251523815	0.0131380392182385
2	SLL1	217	2011	19.0253108651913	1.38478812605168	2.362780589531	39	293.361415563147	41	0	5.68	5.19	5.05	7.38	5.26	0.490641307523576	0.208590118595734	0.132709251523815	0.0131380392182385
2	SLL1	218	2011	20.1858256013259	4.18495855881743	2.56068216373319	39	293.361415563147	41	0	5.68	5.19	5.05	7.38	5.26	0.490641307523576	0.208590118595734	0.132709251523815	0.0131380392182385
2	SLL1	219	2011	17.4057562088098	2.17111353383362	3.84752808697295	39	293.361415563147	41	0	5.68	5.19	5.05	7.38	5.26	0.490641307523576	0.208590118595734	0.132709251523815	0.0131380392182385
2	SLL1	220	2011	15.5065709917184	10.4702553577528	4.34563192578286	39	293.361415563147	41	0	5.68	5.19	5.05	7.38	5.26	0.490641307523576	0.208590118595734	0.132709251523815	0.0131380392182385
2	SLL1	221	2011	14.7754994405963	0.55425394415086	4.86323966342861	39	293.361415563147	41	0	5.68	5.19	5.05	7.38	5.26	0.490641307523576	0.208590118595734	0.132709251523815	0.0131380392182385
2	SLL1	222	2011	16.1077008236126	0	3.90776659384793	39	293.361415563147	41	0	5.68	5.19	5.05	7.38	5.26	0.490641307523576	0.208590118595734	0.132709251523815	0.0131380392182385
2	SLL1	223	2011	19.4083511080958	1.16025418517427	4.86928058068544	39	293.361415563147	41	0	5.68	5.19	5.05	7.38	5.26	0.490641307523576	0.208590118595734	0.132709251523815	0.0131380392182385
3	SLL1	224	2011	18.2547681504894	3.74103383665505	3.09774950871229	39	293.361415563147	41	0	5.68	5.19	5.05	7.38	5.26	0.490641307523576	0.208590118595734	0.132709251523815	0.0131380392182385
3	SLL1	225	2011	18.0703387251635	14.6486426805985	1.91638676867533	39	293.361415563147	41	0	5.68	5.19	5.05	7.38	5.26	0.490641307523576	0.208590118595734	0.132709251523815	0.0131380392182385
3	SLL1	226	2011	17.7336064660131	6.69827244898837	2.99885137332105	39	293.361415563147	41	0	5.68	5.19	5.05	7.38	5.26	0.490641307523576	0.208590118595734	0.132709251523815	0.0131380392182385
3	SLL1	227	2011	16.3602045679386	1.1475974660114	2.09286144270355	39	293.361415563147	41	0	5.68	5.19	5.05	7.38	5.26	0.490641307523576	0.208590118595734	0.132709251523815	0.0131380392182385
3	SLL1	228	2011	17.5852207983978	0	1.57061470692369	39	293.361415563147	41	0	5.68	5.19	5.05	7.38	5.26	0.490641307523576	0.208590118595734	0.132709251523815	0.0131380392182385
3	SLL1	229	2011	19.6183943960967	0	1.98418012864906	39	293.361415563147	41	0	5.68	5.19	5.05	7.38	5.26	0.490641307523576	0.208590118595734	0.132709251523815	0.0131380392182385
3	SLL1	230	2011	19.4419408705369	22.4791026185125	2.44924998711667	39	293.361415563147	41	0	5.68	5.19	5.05	7.38	5.26	0.490641307523576	0.208590118595734	0.132709251523815	0.0131380392182385
3	SLL1	231	2011	17.4967570611441	0.049516268312082	3.26534380681731	39	293.361415563147	41	0	5.68	5.19	5.05	7.38	5.26	0.490641307523576	0.208590118595734	0.132709251523815	0.0131380392182385
3	SLL1	232	2011	18.3015438407674	0	1.82616883170959	39	293.361415563147	41	0	5.68	5.19	5.05	7.38	5.26	0.490641307523576	0.208590118595734	0.132709251523815	0.0131380392182385
3	SLL1	233	2011	21.4736741393217	9.00207698443086	2.4024530731264	39	293.361415563147	41	0	5.68	5.19	5.05	7.38	5.26	0.490641307523576	0.208590118595734	0.132709251523815	0.0131380392182385
3	SLL1	234	2011	19.0491340448267	5.40617549325623	1.78567316067873	39	293.361415563147	41	0	5.68	5.19	5.05	7.38	5.26	0.490641307523576	0.208590118595734	0.132709251523815	0.0131380392182385
3	SLL1	235	2011	20.7478976351473	4.45927227485341	2.32539955802889	39	293.361415563147	41	0	5.68	5.19	5.05	7.38	5.26	0.490641307523576	0.208590118595734	0.132709251523815	0.0131380392182385
3	SLL1	236	2011	20.2461184771021	0	2.24552010181466	39	293.361415563147	41	0	5.68	5.19	5.05	7.38	5.26	0.490641307523576	0.208590118595734	0.132709251523815	0.0131380392182385
3	SLL1	237	2011	19.7515311173099	0	1.71100527361115	39	293.361415563147	41	0	5.68	5.19	5.05	7.38	5.26	0.490641307523576	0.208590118595734	0.132709251523815	0.0131380392182385
4	SLL1	238	2011	19.4595812452559	16.4983512620241	3.23618781708948	39	293.361415563147	41	0	5.68	5.19	5.05	7.38	5.26	0.490641307523576	0.208590118595734	0.132709251523815	0.0131380392182385
4	SLL1	239	2011	15.3553133404441	4.0027475454107	3.50615494858603	39	293.361415563147	41	0	5.68	5.19	5.05	7.38	5.26	0.490641307523576	0.208590118595734	0.132709251523815	0.0131380392182385
4	SLL1	240	2011	14.6757799831981	1.19809122974397	3.90070861413405	39	293.361415563147	41	0	5.68	5.19	5.05	7.38	5.26	0.490641307523576	0.208590118595734	0.132709251523815	0.0131380392182385
4	SLL1	241	2011	13.8107525982641	0.452949910947743	3.89616167806709	39	293.361415563147	41	0	5.68	5.19	5.05	7.38	5.26	0.490641307523576	0.208590118595734	0.132709251523815	0.0131380392182385
4	SLL1	242	2011	12.8479253332567	0.117163367976802	2.43722304068368	39	293.361415563147	41	0	5.68	5.19	5.05	7.38	5.26	0.490641307523576	0.208590118595734	0.132709251523815	0.0131380392182385
4	SLL1	243	2011	13.5147015013274	0	1.6760767792762	39	293.361415563147	41	0	5.68	5.19	5.05	7.38	5.26	0.490641307523576	0.208590118595734	0.132709251523815	0.0131380392182385
4	SLL1	244	2011	14.6363639901405	0	1.39350979968824	39	293.361415563147	41	0	5.68	5.19	5.05	7.38	5.26	0.490641307523576	0.208590118595734	0.132709251523815	0.0131380392182385
4	SLL1	245	2011	18.580841382861	0	1.42080041684096	39	293.361415563147	41	0	5.68	5.19	5.05	7.38	5.26	0.490641307523576	0.208590118595734	0.132709251523815	0.0131380392182385
4	SLL1	246	2011	22.7322554571481	3.25746521242729	1.81000249967148	39	293.361415563147	41	0	5.68	5.19	5.05	7.38	5.26	0.490641307523576	0.208590118595734	0.132709251523815	0.0131380392182385
4	SLL1	247	2011	20.737840974078	2.39337088387871	2.45573992810416	39	293.361415563147	41	0	5.68	5.19	5.05	7.38	5.26	0.490641307523576	0.208590118595734	0.132709251523815	0.0131380392182385
4	SLL1	248	2011	15.9913586751599	0.656929215549843	4.16557060528821	39	293.361415563147	41	0	5.68	5.19	5.05	7.38	5.26	0.490641307523576	0.208590118595734	0.132709251523815	0.0131380392182385
4	SLL1	249	2011	15.6962349724501	14.9766994079987	5.65244957575255	39	293.361415563147	41	0	5.68	5.19	5.05	7.38	5.26	0.490641307523576	0.208590118595734	0.132709251523815	0.0131380392182385
4	SLL1	250	2011	14.9116552035113	5.34310795386804	5.54061427898539	39	293.361415563147	41	0	5.68	5.19	5.05	7.38	5.26	0.490641307523576	0.208590118595734	0.132709251523815	0.0131380392182385
4	SLL1	251	2011	13.9496314108616	2.96583236447882	4.73491302379995	39	293.361415563147	41	0	5.68	5.19	5.05	7.38	5.26	0.490641307523576	0.208590118595734	0.132709251523815	0.0131380392182385
4	SLL1	252	2011	17.6137061954186	0.0303129991837059	2.35347027889753	39	293.361415563147	41	0	5.68	5.19	5.05	7.38	5.26	0.490641307523576	0.208590118595734	0.132709251523815	0.0131380392182385
4	SLL1	253	2011	22.2920721961016	0	2.70594190137611	39	293.361415563147	41	0	5.68	5.19	5.05	7.38	5.26	0.490641307523576	0.208590118595734	0.132709251523815	0.0131380392182385
5	POM1	80	2015	4.07947660180809	0.834602487516896	2.53539754395826	17	191.534367068585	31	2	3.16	5.74	3.16	7.21	4.32	0.152767275071839	0.474500314417849	0	0.00564360139776644
5	POM1	81	2015	3.5382157501615	0	3.81239390669561	17	191.534367068585	31	2	3.16	5.74	3.16	7.21	4.32	0.152767275071839	0.474500314417849	0	0.00564360139776644
5	POM1	82	2015	3.48925955931934	0	1.88179330813996	17	191.534367068585	31	2	3.16	5.74	3.16	7.21	4.32	0.152767275071839	0.474500314417849	0	0.00564360139776644
5	POM1	83	2015	7.15971050387576	0	1.56968634810269	17	191.534367068585	31	2	3.16	5.74	3.16	7.21	4.32	0.152767275071839	0.474500314417849	0	0.00564360139776644
5	POM1	84	2015	7.47867135280818	0	2.99120120039981	17	191.534367068585	31	2	3.16	5.74	3.16	7.21	4.32	0.152767275071839	0.474500314417849	0	0.00564360139776644
5	POM1	85	2015	5.42668725082472	0.279044881086141	3.73859191008498	17	191.534367068585	31	2	3.16	5.74	3.16	7.21	4.32	0.152767275071839	0.474500314417849	0	0.00564360139776644
5	POM1	86	2015	5.90496844052723	0	4.00093734302225	17	191.534367068585	31	2	3.16	5.74	3.16	7.21	4.32	0.152767275071839	0.474500314417849	0	0.00564360139776644
5	POM1	87	2015	7.34313803478751	0.654688123167776	3.70825968309433	17	191.534367068585	31	2	3.16	5.74	3.16	7.21	4.32	0.152767275071839	0.474500314417849	0	0.00564360139776644
5	POM1	88	2015	9.81718082566239	13.9509398939361	7.49397012522294	17	191.534367068585	31	2	3.16	5.74	3.16	7.21	4.32	0.152767275071839	0.474500314417849	0	0.00564360139776644
5	POM1	89	2015	6.56997575275544	2.39793930670684	6.47189757843035	17	191.534367068585	31	2	3.16	5.74	3.16	7.21	4.32	0.152767275071839	0.474500314417849	0	0.00564360139776644
5	POM1	90	2015	8.40811335992899	7.91812912162963	9.34189779863292	17	191.534367068585	31	2	3.16	5.74	3.16	7.21	4.32	0.152767275071839	0.474500314417849	0	0.00564360139776644
5	POM1	91	2015	4.52743819783845	4.10945249016664	6.9472815977161	17	191.534367068585	31	2	3.16	5.74	3.16	7.21	4.32	0.152767275071839	0.474500314417849	0	0.00564360139776644
5	POM1	92	2015	4.91580703597407	1.66713699497494	5.63265804599756	17	191.534367068585	31	2	3.16	5.74	3.16	7.21	4.32	0.152767275071839	0.474500314417849	0	0.00564360139776644
5	POM1	93	2015	5.17346976496689	0	2.05918332557572	17	191.534367068585	31	2	3.16	5.74	3.16	7.21	4.32	0.152767275071839	0.474500314417849	0	0.00564360139776644
5	POM1	94	2015	4.42291993447283	3.35731636503043	2.83706602642966	17	191.534367068585	31	2	3.16	5.74	3.16	7.21	4.32	0.152767275071839	0.474500314417849	0	0.00564360139776644
5	POM1	95	2015	4.35338354794937	0	2.68346978377019	17	191.534367068585	31	2	3.16	5.74	3.16	7.21	4.32	0.152767275071839	0.474500314417849	0	0.00564360139776644
5	POM1	96	2015	4.36404254759709	0	2.29453205260607	17	191.534367068585	31	2	3.16	5.74	3.16	7.21	4.32	0.152767275071839	0.474500314417849	0	0.00564360139776644
5	POM1	97	2015	6.6398119454606	0	1.87277945561609	17	191.534367068585	31	2	3.16	5.74	3.16	7.21	4.32	0.152767275071839	0.474500314417849	0	0.00564360139776644
5	POM1	98	2015	8.54411070451889	0	1.93343432949278	17	191.534367068585	31	2	3.16	5.74	3.16	7.21	4.32	0.152767275071839	0.474500314417849	0	0.00564360139776644
5	POM1	99	2015	12.0400510430436	0	1.94676992504701	17	191.534367068585	31	2	3.16	5.74	3.16	7.21	4.32	0.152767275071839	0.474500314417849	0	0.00564360139776644
6	POM1	100	2015	14.9336183499315	0	2.19601494048603	17	191.534367068585	31	2	3.16	5.74	3.16	7.21	4.32	0.152767275071839	0.474500314417849	0	0.00564360139776644
6	POM1	101	2015	11.4076113751948	0.381536097940436	4.27340155290283	17	191.534367068585	31	2	3.16	5.74	3.16	7.21	4.32	0.152767275071839	0.474500314417849	0	0.00564360139776644
6	POM1	102	2015	10.628935398606	0	3.03422386762458	17	191.534367068585	31	2	3.16	5.74	3.16	7.21	4.32	0.152767275071839	0.474500314417849	0	0.00564360139776644
6	POM1	103	2015	10.5146517798191	0	3.54772635973296	17	191.534367068585	31	2	3.16	5.74	3.16	7.21	4.32	0.152767275071839	0.474500314417849	0	0.00564360139776644
6	POM1	104	2015	13.2112984049238	0	3.16941292543961	17	191.534367068585	31	2	3.16	5.74	3.16	7.21	4.32	0.152767275071839	0.474500314417849	0	0.00564360139776644
6	POM1	105	2015	16.7693990196649	0	2.70337328780178	17	191.534367068585	31	2	3.16	5.74	3.16	7.21	4.32	0.152767275071839	0.474500314417849	0	0.00564360139776644
6	POM1	106	2015	15.289515795526	0	2.26517083228182	17	191.534367068585	31	2	3.16	5.74	3.16	7.21	4.32	0.152767275071839	0.474500314417849	0	0.00564360139776644
6	POM1	107	2015	9.71219879224111	0	3.45837065400713	17	191.534367068585	31	2	3.16	5.74	3.16	7.21	4.32	0.152767275071839	0.474500314417849	0	0.00564360139776644
6	POM1	108	2015	7.53938345570741	0	2.98176626202417	17	191.534367068585	31	2	3.16	5.74	3.16	7.21	4.32	0.152767275071839	0.474500314417849	0	0.00564360139776644
6	POM1	109	2015	9.09414340396943	0	2.57798585518196	17	191.534367068585	31	2	3.16	5.74	3.16	7.21	4.32	0.152767275071839	0.474500314417849	0	0.00564360139776644
6	POM1	110	2015	12.1248062076661	0	2.7676038273822	17	191.534367068585	31	2	3.16	5.74	3.16	7.21	4.32	0.152767275071839	0.474500314417849	0	0.00564360139776644
6	POM1	111	2015	14.2105648777249	0	2.5643086091176	17	191.534367068585	31	2	3.16	5.74	3.16	7.21	4.32	0.152767275071839	0.474500314417849	0	0.00564360139776644
6	POM1	112	2015	9.52879012259194	0	2.97267615161239	17	191.534367068585	31	2	3.16	5.74	3.16	7.21	4.32	0.152767275071839	0.474500314417849	0	0.00564360139776644
6	POM1	113	2015	10.844067660094	0	1.811225588132	17	191.534367068585	31	2	3.16	5.74	3.16	7.21	4.32	0.152767275071839	0.474500314417849	0	0.00564360139776644
6	POM1	114	2015	14.2539399511401	0	2.37228518276099	17	191.534367068585	31	2	3.16	5.74	3.16	7.21	4.32	0.152767275071839	0.474500314417849	0	0.00564360139776644
6	POM1	115	2015	12.403744351999	2.09708031748404	2.66565881679069	17	191.534367068585	31	2	3.16	5.74	3.16	7.21	4.32	0.152767275071839	0.474500314417849	0	0.00564360139776644
6	POM1	116	2015	14.199109042885	11.0823240249965	2.63900672614175	17	191.534367068585	31	2	3.16	5.74	3.16	7.21	4.32	0.152767275071839	0.474500314417849	0	0.00564360139776644
6	POM1	117	2015	8.85355201156065	6.50019389860932	3.46009904279514	17	191.534367068585	31	2	3.16	5.74	3.16	7.21	4.32	0.152767275071839	0.474500314417849	0	0.00564360139776644
6	POM1	118	2015	7.82711973808415	0	3.2823798701824	17	191.534367068585	31	2	3.16	5.74	3.16	7.21	4.32	0.152767275071839	0.474500314417849	0	0.00564360139776644
6	POM1	119	2015	8.56784232775439	0	2.28578250817051	17	191.534367068585	31	2	3.16	5.74	3.16	7.21	4.32	0.152767275071839	0.474500314417849	0	0.00564360139776644
6	POM1	120	2015	8.05481649717449	4.59096648310212	3.42123742531159	17	191.534367068585	31	2	3.16	5.74	3.16	7.21	4.32	0.152767275071839	0.474500314417849	0	0.00564360139776644
7	POM1	121	2015	7.52021365989569	0	1.81842504454818	17	191.534367068585	31	2	3.16	5.74	3.16	7.21	4.32	0.152767275071839	0.474500314417849	0	0.00564360139776644
7	POM1	122	2015	9.90771800597314	0	1.72098398979929	17	191.534367068585	31	2	3.16	5.74	3.16	7.21	4.32	0.152767275071839	0.474500314417849	0	0.00564360139776644
7	POM1	123	2015	13.4096561430128	2.63250712632855	3.247530722363	17	191.534367068585	31	2	3.16	5.74	3.16	7.21	4.32	0.152767275071839	0.474500314417849	0	0.00564360139776644
7	POM1	124	2015	16.6240131961108	0.206136768765967	3.37109311440933	17	191.534367068585	31	2	3.16	5.74	3.16	7.21	4.32	0.152767275071839	0.474500314417849	0	0.00564360139776644
7	POM1	125	2015	17.237742858694	0	5.17984988113169	17	191.534367068585	31	2	3.16	5.74	3.16	7.21	4.32	0.152767275071839	0.474500314417849	0	0.00564360139776644
7	POM1	126	2015	11.8178048635338	0.106161849335965	4.6853408992808	17	191.534367068585	31	2	3.16	5.74	3.16	7.21	4.32	0.152767275071839	0.474500314417849	0	0.00564360139776644
7	POM1	127	2015	11.3779391334855	0	3.37799597231819	17	191.534367068585	31	2	3.16	5.74	3.16	7.21	4.32	0.152767275071839	0.474500314417849	0	0.00564360139776644
7	POM1	128	2015	14.2668902221038	0	1.70683718708957	17	191.534367068585	31	2	3.16	5.74	3.16	7.21	4.32	0.152767275071839	0.474500314417849	0	0.00564360139776644
7	POM1	129	2015	14.1386089771027	2.70713073594042	4.33537060359346	17	191.534367068585	31	2	3.16	5.74	3.16	7.21	4.32	0.152767275071839	0.474500314417849	0	0.00564360139776644
7	POM1	130	2015	13.9448498008502	0	2.39130491490878	17	191.534367068585	31	2	3.16	5.74	3.16	7.21	4.32	0.152767275071839	0.474500314417849	0	0.00564360139776644
7	POM1	131	2015	17.9372303194189	0	2.56475109960213	17	191.534367068585	31	2	3.16	5.74	3.16	7.21	4.32	0.152767275071839	0.474500314417849	0	0.00564360139776644
7	POM1	132	2015	18.6591700904012	0.0700771107492739	3.94359527576486	17	191.534367068585	31	2	3.16	5.74	3.16	7.21	4.32	0.152767275071839	0.474500314417849	0	0.00564360139776644
7	POM1	133	2015	13.8336327351469	0	2.08139275460824	17	191.534367068585	31	2	3.16	5.74	3.16	7.21	4.32	0.152767275071839	0.474500314417849	0	0.00564360139776644
7	POM1	134	2015	12.9988590702123	0.895145702062209	1.9056302070031	17	191.534367068585	31	2	3.16	5.74	3.16	7.21	4.32	0.152767275071839	0.474500314417849	0	0.00564360139776644
7	POM1	135	2015	13.4096856330612	0	2.89313168052846	17	191.534367068585	31	2	3.16	5.74	3.16	7.21	4.32	0.152767275071839	0.474500314417849	0	0.00564360139776644
7	POM1	136	2015	10.795938638675	0	2.98470101191206	17	191.534367068585	31	2	3.16	5.74	3.16	7.21	4.32	0.152767275071839	0.474500314417849	0	0.00564360139776644
7	POM1	137	2015	13.0495981152053	0	2.22585636458695	17	191.534367068585	31	2	3.16	5.74	3.16	7.21	4.32	0.152767275071839	0.474500314417849	0	0.00564360139776644
7	POM1	138	2015	14.4993886130819	0	3.55752892419595	17	191.534367068585	31	2	3.16	5.74	3.16	7.21	4.32	0.152767275071839	0.474500314417849	0	0.00564360139776644
7	POM1	139	2015	11.0173312489877	0	4.61088011530261	17	191.534367068585	31	2	3.16	5.74	3.16	7.21	4.32	0.152767275071839	0.474500314417849	0	0.00564360139776644
8	POM1	140	2015	9.49232227927533	0.31072785652155	2.68077511235265	17	191.534367068585	31	2	3.16	5.74	3.16	7.21	4.32	0.152767275071839	0.474500314417849	0	0.00564360139776644
8	POM1	141	2015	10.5494017700454	0	2.13905591508433	17	191.534367068585	31	2	3.16	5.74	3.16	7.21	4.32	0.152767275071839	0.474500314417849	0	0.00564360139776644
8	POM1	142	2015	14.3848337311137	0	1.40096269414137	17	191.534367068585	31	2	3.16	5.74	3.16	7.21	4.32	0.152767275071839	0.474500314417849	0	0.00564360139776644
8	POM1	143	2015	14.7959118598839	0	2.37523278294599	17	191.534367068585	31	2	3.16	5.74	3.16	7.21	4.32	0.152767275071839	0.474500314417849	0	0.00564360139776644
8	POM1	144	2015	15.2878664474279	0.33548951472062	1.69426304277301	17	191.534367068585	31	2	3.16	5.74	3.16	7.21	4.32	0.152767275071839	0.474500314417849	0	0.00564360139776644
8	POM1	145	2015	12.4512719455606	0.136181938735024	1.96792324872586	17	191.534367068585	31	2	3.16	5.74	3.16	7.21	4.32	0.152767275071839	0.474500314417849	0	0.00564360139776644
8	POM1	146	2015	10.235653739733	0	2.83635439219312	17	191.534367068585	31	2	3.16	5.74	3.16	7.21	4.32	0.152767275071839	0.474500314417849	0	0.00564360139776644
8	POM1	147	2015	10.2846379336189	0	1.84996641451812	17	191.534367068585	31	2	3.16	5.74	3.16	7.21	4.32	0.152767275071839	0.474500314417849	0	0.00564360139776644
8	POM1	148	2015	13.6326745604987	0	3.82642451367102	17	191.534367068585	31	2	3.16	5.74	3.16	7.21	4.32	0.152767275071839	0.474500314417849	0	0.00564360139776644
8	POM1	149	2015	11.7566657253259	3.70175857112508	3.19766049506642	17	191.534367068585	31	2	3.16	5.74	3.16	7.21	4.32	0.152767275071839	0.474500314417849	0	0.00564360139776644
8	POM1	150	2015	11.2474627956313	0	3.85047276233131	17	191.534367068585	31	2	3.16	5.74	3.16	7.21	4.32	0.152767275071839	0.474500314417849	0	0.00564360139776644
8	POM1	151	2015	13.9290389135598	3.9772841903794	3.99983574617345	17	191.534367068585	31	2	3.16	5.74	3.16	7.21	4.32	0.152767275071839	0.474500314417849	0	0.00564360139776644
8	POM1	152	2015	12.9630266492457	0	2.7051680134949	17	191.534367068585	31	2	3.16	5.74	3.16	7.21	4.32	0.152767275071839	0.474500314417849	0	0.00564360139776644
8	POM1	153	2015	16.6516512736527	0	5.04902044835015	17	191.534367068585	31	2	3.16	5.74	3.16	7.21	4.32	0.152767275071839	0.474500314417849	0	0.00564360139776644
8	POM1	154	2015	16.871778138505	0	3.94125240453263	17	191.534367068585	31	2	3.16	5.74	3.16	7.21	4.32	0.152767275071839	0.474500314417849	0	0.00564360139776644
8	POM1	155	2015	17.7254123914163	0	2.28056470980933	17	191.534367068585	31	2	3.16	5.74	3.16	7.21	4.32	0.152767275071839	0.474500314417849	0	0.00564360139776644
8	POM1	156	2015	23.1513131298787	13.0316168743899	2.63959356827131	17	191.534367068585	31	2	3.16	5.74	3.16	7.21	4.32	0.152767275071839	0.474500314417849	0	0.00564360139776644
8	POM1	157	2015	19.0695084070153	0	2.97503135166616	17	191.534367068585	31	2	3.16	5.74	3.16	7.21	4.32	0.152767275071839	0.474500314417849	0	0.00564360139776644
8	POM1	158	2015	15.4475601383464	0	3.00775476256127	17	191.534367068585	31	2	3.16	5.74	3.16	7.21	4.32	0.152767275071839	0.474500314417849	0	0.00564360139776644
8	POM1	159	2015	14.22642913346	0	4.37506531741136	17	191.534367068585	31	2	3.16	5.74	3.16	7.21	4.32	0.152767275071839	0.474500314417849	0	0.00564360139776644
8	POM1	160	2015	13.2513364743572	0	4.20471906380043	17	191.534367068585	31	2	3.16	5.74	3.16	7.21	4.32	0.152767275071839	0.474500314417849	0	0.00564360139776644
8	POM1	161	2015	15.9929917126797	0	3.27156492122044	17	191.534367068585	31	2	3.16	5.74	3.16	7.21	4.32	0.152767275071839	0.474500314417849	0	0.00564360139776644
9	POM1	162	2015	18.4886815662163	0	2.9820773663088	17	191.534367068585	31	2	3.16	5.74	3.16	7.21	4.32	0.152767275071839	0.474500314417849	0	0.00564360139776644
9	POM1	163	2015	20.2807541744588	3.15562094718383	2.37179498242018	17	191.534367068585	31	2	3.16	5.74	3.16	7.21	4.32	0.152767275071839	0.474500314417849	0	0.00564360139776644
9	POM1	164	2015	18.663604905252	3.16275466695149	2.7691469590277	17	191.534367068585	31	2	3.16	5.74	3.16	7.21	4.32	0.152767275071839	0.474500314417849	0	0.00564360139776644
9	POM1	165	2015	18.7638970458136	0	2.19187756714445	17	191.534367068585	31	2	3.16	5.74	3.16	7.21	4.32	0.152767275071839	0.474500314417849	0	0.00564360139776644
9	POM1	166	2015	16.1872663783322	0	3.1146540083981	17	191.534367068585	31	2	3.16	5.74	3.16	7.21	4.32	0.152767275071839	0.474500314417849	0	0.00564360139776644
9	POM1	167	2015	13.6909869303497	0	3.05167339375273	17	191.534367068585	31	2	3.16	5.74	3.16	7.21	4.32	0.152767275071839	0.474500314417849	0	0.00564360139776644
9	POM1	168	2015	15.2037782042998	6.3018253140008	2.14421083188944	17	191.534367068585	31	2	3.16	5.74	3.16	7.21	4.32	0.152767275071839	0.474500314417849	0	0.00564360139776644
9	POM1	169	2015	15.8154695878119	4.02554458425645	3.80984597270932	17	191.534367068585	31	2	3.16	5.74	3.16	7.21	4.32	0.152767275071839	0.474500314417849	0	0.00564360139776644
9	POM1	170	2015	11.7240187904989	0	2.96360520224182	17	191.534367068585	31	2	3.16	5.74	3.16	7.21	4.32	0.152767275071839	0.474500314417849	0	0.00564360139776644
9	POM1	171	2015	12.1506516569268	0.122681232584311	2.35393372806997	17	191.534367068585	31	2	3.16	5.74	3.16	7.21	4.32	0.152767275071839	0.474500314417849	0	0.00564360139776644
9	POM1	172	2015	14.3644579281159	2.46794479059897	2.80254391785066	17	191.534367068585	31	2	3.16	5.74	3.16	7.21	4.32	0.152767275071839	0.474500314417849	0	0.00564360139776644
9	POM1	173	2015	11.8225160399094	11.520642606345	3.3535346952649	17	191.534367068585	31	2	3.16	5.74	3.16	7.21	4.32	0.152767275071839	0.474500314417849	0	0.00564360139776644
9	POM1	174	2015	11.387341318403	1.88988173276119	3.49489210251884	17	191.534367068585	31	2	3.16	5.74	3.16	7.21	4.32	0.152767275071839	0.474500314417849	0	0.00564360139776644
9	POM1	175	2015	13.9902267020503	0	1.9764650908206	17	191.534367068585	31	2	3.16	5.74	3.16	7.21	4.32	0.152767275071839	0.474500314417849	0	0.00564360139776644
9	POM1	176	2015	17.9457280847817	0	1.74697582153744	17	191.534367068585	31	2	3.16	5.74	3.16	7.21	4.32	0.152767275071839	0.474500314417849	0	0.00564360139776644
9	POM1	177	2015	20.4470975281392	6.00648198193253	2.08338418323543	17	191.534367068585	31	2	3.16	5.74	3.16	7.21	4.32	0.152767275071839	0.474500314417849	0	0.00564360139776644
9	POM1	178	2015	18.9475621791777	0	3.20203112061674	17	191.534367068585	31	2	3.16	5.74	3.16	7.21	4.32	0.152767275071839	0.474500314417849	0	0.00564360139776644
9	POM1	179	2015	18.2286875922989	0	1.65006535304251	17	191.534367068585	31	2	3.16	5.74	3.16	7.21	4.32	0.152767275071839	0.474500314417849	0	0.00564360139776644
9	POM1	180	2015	21.0989228265682	0	2.14432499971673	17	191.534367068585	31	2	3.16	5.74	3.16	7.21	4.32	0.152767275071839	0.474500314417849	0	0.00564360139776644
9	POM1	181	2015	21.8653339650492	0	2.03068346935782	17	191.534367068585	31	2	3.16	5.74	3.16	7.21	4.32	0.152767275071839	0.474500314417849	0	0.00564360139776644
9	POM1	182	2015	25.8739025106574	0	3.16355639321368	17	191.534367068585	31	2	3.16	5.74	3.16	7.21	4.32	0.152767275071839	0.474500314417849	0	0.00564360139776644
10	POM1	183	2015	28.8035563328359	0	3.07069442792393	17	191.534367068585	31	2	3.16	5.74	3.16	7.21	4.32	0.152767275071839	0.474500314417849	0	0.00564360139776644
10	POM1	184	2015	27.0871592977423	0	1.98738931329762	17	191.534367068585	31	2	3.16	5.74	3.16	7.21	4.32	0.152767275071839	0.474500314417849	0	0.00564360139776644
10	POM1	185	2015	28.339154056723	1.29521923035243	2.4540859633564	17	191.534367068585	31	2	3.16	5.74	3.16	7.21	4.32	0.152767275071839	0.474500314417849	0	0.00564360139776644
10	POM1	186	2015	26.0891501215581	0.541829855607916	3.26800712845123	17	191.534367068585	31	2	3.16	5.74	3.16	7.21	4.32	0.152767275071839	0.474500314417849	0	0.00564360139776644
10	POM1	187	2015	20.3223431324364	0	2.36340287540037	17	191.534367068585	31	2	3.16	5.74	3.16	7.21	4.32	0.152767275071839	0.474500314417849	0	0.00564360139776644
10	POM1	188	2015	23.0515760659256	1.12273889409456	2.88553771063339	17	191.534367068585	31	2	3.16	5.74	3.16	7.21	4.32	0.152767275071839	0.474500314417849	0	0.00564360139776644
10	POM1	189	2015	15.7821347144773	1.11935133436509	5.60279627013357	17	191.534367068585	31	2	3.16	5.74	3.16	7.21	4.32	0.152767275071839	0.474500314417849	0	0.00564360139776644
10	POM1	190	2015	14.8672146239111	0	3.91324175645632	17	191.534367068585	31	2	3.16	5.74	3.16	7.21	4.32	0.152767275071839	0.474500314417849	0	0.00564360139776644
10	POM1	191	2015	16.134712849179	0	2.03227199715169	17	191.534367068585	31	2	3.16	5.74	3.16	7.21	4.32	0.152767275071839	0.474500314417849	0	0.00564360139776644
10	POM1	192	2015	22.087881016518	0	2.9613204902882	17	191.534367068585	31	2	3.16	5.74	3.16	7.21	4.32	0.152767275071839	0.474500314417849	0	0.00564360139776644
10	POM1	193	2015	17.8369066701249	0.176514346999904	2.87203956245519	17	191.534367068585	31	2	3.16	5.74	3.16	7.21	4.32	0.152767275071839	0.474500314417849	0	0.00564360139776644
10	POM1	194	2015	16.7026064926007	0.119751546453911	3.40207878734793	17	191.534367068585	31	2	3.16	5.74	3.16	7.21	4.32	0.152767275071839	0.474500314417849	0	0.00564360139776644
10	POM1	195	2015	19.4021892301006	0	4.00451664074965	17	191.534367068585	31	2	3.16	5.74	3.16	7.21	4.32	0.152767275071839	0.474500314417849	0	0.00564360139776644
10	POM1	196	2015	20.860787875857	0	2.02266593798338	17	191.534367068585	31	2	3.16	5.74	3.16	7.21	4.32	0.152767275071839	0.474500314417849	0	0.00564360139776644
10	POM1	197	2015	24.3633287375636	0.276036810770577	1.65598842969215	17	191.534367068585	31	2	3.16	5.74	3.16	7.21	4.32	0.152767275071839	0.474500314417849	0	0.00564360139776644
10	POM1	198	2015	27.5101882590136	0	3.50620735596818	17	191.534367068585	31	2	3.16	5.74	3.16	7.21	4.32	0.152767275071839	0.474500314417849	0	0.00564360139776644
10	POM1	199	2015	22.9587847846645	12.5680526058068	3.03681274747649	17	191.534367068585	31	2	3.16	5.74	3.16	7.21	4.32	0.152767275071839	0.474500314417849	0	0.00564360139776644
10	POM1	200	2015	19.7091863377022	0.116325584299847	3.24159666568235	17	191.534367068585	31	2	3.16	5.74	3.16	7.21	4.32	0.152767275071839	0.474500314417849	0	0.00564360139776644
10	POM1	201	2015	20.5043326017653	0.0759532999429626	2.51496274985372	17	191.534367068585	31	2	3.16	5.74	3.16	7.21	4.32	0.152767275071839	0.474500314417849	0	0.00564360139776644
11	POM1	202	2015	23.75672334345	0	2.98908624948972	17	191.534367068585	31	2	3.16	5.74	3.16	7.21	4.32	0.152767275071839	0.474500314417849	0	0.00564360139776644
11	POM1	203	2015	22.8614413425731	0	2.42113681306448	17	191.534367068585	31	2	3.16	5.74	3.16	7.21	4.32	0.152767275071839	0.474500314417849	0	0.00564360139776644
11	POM1	204	2015	19.2930028391708	0	2.33123133144767	17	191.534367068585	31	2	3.16	5.74	3.16	7.21	4.32	0.152767275071839	0.474500314417849	0	0.00564360139776644
11	POM1	205	2015	21.4033266707676	3.42258486898119	2.18140414198724	17	191.534367068585	31	2	3.16	5.74	3.16	7.21	4.32	0.152767275071839	0.474500314417849	0	0.00564360139776644
11	POM1	206	2015	15.3570166355713	5.96495279600531	6.24412028917056	17	191.534367068585	31	2	3.16	5.74	3.16	7.21	4.32	0.152767275071839	0.474500314417849	0	0.00564360139776644
11	POM1	207	2015	14.5366421359151	5.97252100144847	2.81859848327269	17	191.534367068585	31	2	3.16	5.74	3.16	7.21	4.32	0.152767275071839	0.474500314417849	0	0.00564360139776644
11	POM1	208	2015	16.2163436278756	3.91807763201387	5.06368049413897	17	191.534367068585	31	2	3.16	5.74	3.16	7.21	4.32	0.152767275071839	0.474500314417849	0	0.00564360139776644
11	POM1	209	2015	15.4643676544412	0	5.37032878575893	17	191.534367068585	31	2	3.16	5.74	3.16	7.21	4.32	0.152767275071839	0.474500314417849	0	0.00564360139776644
11	POM1	210	2015	14.7619356797476	0	4.22300915785685	17	191.534367068585	31	2	3.16	5.74	3.16	7.21	4.32	0.152767275071839	0.474500314417849	0	0.00564360139776644
11	POM1	211	2015	13.0071676840197	0.39577113863835	2.82253694517355	17	191.534367068585	31	2	3.16	5.74	3.16	7.21	4.32	0.152767275071839	0.474500314417849	0	0.00564360139776644
11	POM1	212	2015	14.5839713172839	0	2.3330501702191	17	191.534367068585	31	2	3.16	5.74	3.16	7.21	4.32	0.152767275071839	0.474500314417849	0	0.00564360139776644
11	POM1	213	2015	18.945704701387	0	2.17310772369808	17	191.534367068585	31	2	3.16	5.74	3.16	7.21	4.32	0.152767275071839	0.474500314417849	0	0.00564360139776644
11	POM1	214	2015	21.1118876227859	0	1.874476018471	17	191.534367068585	31	2	3.16	5.74	3.16	7.21	4.32	0.152767275071839	0.474500314417849	0	0.00564360139776644
11	POM1	215	2015	25.2961888633527	0	2.39492372650588	17	191.534367068585	31	2	3.16	5.74	3.16	7.21	4.32	0.152767275071839	0.474500314417849	0	0.00564360139776644
11	POM1	216	2015	19.6840193568859	4.39088819700868	2.8101068737592	17	191.534367068585	31	2	3.16	5.74	3.16	7.21	4.32	0.152767275071839	0.474500314417849	0	0.00564360139776644
11	POM1	217	2015	20.1778590779512	0	2.31904266387949	17	191.534367068585	31	2	3.16	5.74	3.16	7.21	4.32	0.152767275071839	0.474500314417849	0	0.00564360139776644
11	POM1	218	2015	26.0633613487953	0	2.31228300833902	17	191.534367068585	31	2	3.16	5.74	3.16	7.21	4.32	0.152767275071839	0.474500314417849	0	0.00564360139776644
11	POM1	219	2015	26.8929407659313	0.492634626707751	2.77873189688061	17	191.534367068585	31	2	3.16	5.74	3.16	7.21	4.32	0.152767275071839	0.474500314417849	0	0.00564360139776644
11	POM1	220	2015	21.8614119062152	0	3.27278670706525	17	191.534367068585	31	2	3.16	5.74	3.16	7.21	4.32	0.152767275071839	0.474500314417849	0	0.00564360139776644
11	POM1	221	2015	20.956778617051	12.5734686525506	2.85507998276206	17	191.534367068585	31	2	3.16	5.74	3.16	7.21	4.32	0.152767275071839	0.474500314417849	0	0.00564360139776644
11	POM1	222	2015	18.5955243586429	2.60894489723982	2.58908831196546	17	191.534367068585	31	2	3.16	5.74	3.16	7.21	4.32	0.152767275071839	0.474500314417849	0	0.00564360139776644
11	POM1	223	2015	19.7632337492572	0	2.4532036473692	17	191.534367068585	31	2	3.16	5.74	3.16	7.21	4.32	0.152767275071839	0.474500314417849	0	0.00564360139776644
12	POM1	224	2015	21.7548177704152	0	2.32806028320228	17	191.534367068585	31	2	3.16	5.74	3.16	7.21	4.32	0.152767275071839	0.474500314417849	0	0.00564360139776644
12	POM1	225	2015	25.4362941666616	0	3.00378378237575	17	191.534367068585	31	2	3.16	5.74	3.16	7.21	4.32	0.152767275071839	0.474500314417849	0	0.00564360139776644
12	POM1	226	2015	21.6004993550449	0	2.80938667448017	17	191.534367068585	31	2	3.16	5.74	3.16	7.21	4.32	0.152767275071839	0.474500314417849	0	0.00564360139776644
12	POM1	227	2015	18.1852389289289	0.761176543627681	3.01384005894347	17	191.534367068585	31	2	3.16	5.74	3.16	7.21	4.32	0.152767275071839	0.474500314417849	0	0.00564360139776644
12	POM1	228	2015	14.533004639919	2.18708929974093	3.18226488108576	17	191.534367068585	31	2	3.16	5.74	3.16	7.21	4.32	0.152767275071839	0.474500314417849	0	0.00564360139776644
12	POM1	229	2015	13.8180707760124	0.660102641215096	2.98076746047737	17	191.534367068585	31	2	3.16	5.74	3.16	7.21	4.32	0.152767275071839	0.474500314417849	0	0.00564360139776644
12	POM1	230	2015	14.4100294343071	0	2.11326906971199	17	191.534367068585	31	2	3.16	5.74	3.16	7.21	4.32	0.152767275071839	0.474500314417849	0	0.00564360139776644
12	POM1	231	2015	15.182601650234	0	1.44235166059114	17	191.534367068585	31	2	3.16	5.74	3.16	7.21	4.32	0.152767275071839	0.474500314417849	0	0.00564360139776644
12	POM1	232	2015	17.8096145680336	0	1.48974018751564	17	191.534367068585	31	2	3.16	5.74	3.16	7.21	4.32	0.152767275071839	0.474500314417849	0	0.00564360139776644
12	POM1	233	2015	19.3775022873476	0	1.98344088942644	17	191.534367068585	31	2	3.16	5.74	3.16	7.21	4.32	0.152767275071839	0.474500314417849	0	0.00564360139776644
12	POM1	234	2015	20.0224747796582	0	2.65344167905782	17	191.534367068585	31	2	3.16	5.74	3.16	7.21	4.32	0.152767275071839	0.474500314417849	0	0.00564360139776644
12	POM1	235	2015	19.5724631384532	10.096822665712	4.00626927477812	17	191.534367068585	31	2	3.16	5.74	3.16	7.21	4.32	0.152767275071839	0.474500314417849	0	0.00564360139776644
12	POM1	236	2015	17.6117137914817	4.19778950014339	4.34458269919346	17	191.534367068585	31	2	3.16	5.74	3.16	7.21	4.32	0.152767275071839	0.474500314417849	0	0.00564360139776644
12	POM1	237	2015	15.5410313139929	0	5.3989926736491	17	191.534367068585	31	2	3.16	5.74	3.16	7.21	4.32	0.152767275071839	0.474500314417849	0	0.00564360139776644
12	POM1	238	2015	20.4965746777913	0	3.91417559103126	17	191.534367068585	31	2	3.16	5.74	3.16	7.21	4.32	0.152767275071839	0.474500314417849	0	0.00564360139776644
12	POM1	239	2015	18.7328562850335	19.9630051313424	2.74413499042225	17	191.534367068585	31	2	3.16	5.74	3.16	7.21	4.32	0.152767275071839	0.474500314417849	0	0.00564360139776644
12	POM1	240	2015	15.6206163364482	0	1.39567308022774	17	191.534367068585	31	2	3.16	5.74	3.16	7.21	4.32	0.152767275071839	0.474500314417849	0	0.00564360139776644
12	POM1	241	2015	20.973836768536	0	1.68460736088365	17	191.534367068585	31	2	3.16	5.74	3.16	7.21	4.32	0.152767275071839	0.474500314417849	0	0.00564360139776644
12	POM1	242	2015	25.4323223787942	0	2.10619574983482	17	191.534367068585	31	2	3.16	5.74	3.16	7.21	4.32	0.152767275071839	0.474500314417849	0	0.00564360139776644
12	POM1	243	2015	25.6043619729569	3.33473923207181	3.27695176686922	17	191.534367068585	31	2	3.16	5.74	3.16	7.21	4.32	0.152767275071839	0.474500314417849	0	0.00564360139776644
12	POM1	244	2015	16.2581150309082	20.9952292497452	2.53208549073721	17	191.534367068585	31	2	3.16	5.74	3.16	7.21	4.32	0.152767275071839	0.474500314417849	0	0.00564360139776644
12	POM1	245	2015	14.4743708363535	0	1.64465097392195	17	191.534367068585	31	2	3.16	5.74	3.16	7.21	4.32	0.152767275071839	0.474500314417849	0	0.00564360139776644
12	POM1	246	2015	13.6925702507999	0.0624847388101237	2.16866515685665	17	191.534367068585	31	2	3.16	5.74	3.16	7.21	4.32	0.152767275071839	0.474500314417849	0	0.00564360139776644
12	POM1	247	2015	12.5375529271538	0	2.93840925626448	17	191.534367068585	31	2	3.16	5.74	3.16	7.21	4.32	0.152767275071839	0.474500314417849	0	0.00564360139776644
12	POM1	248	2015	11.7717522599759	1.15901976261087	3.93923715236492	17	191.534367068585	31	2	3.16	5.74	3.16	7.21	4.32	0.152767275071839	0.474500314417849	0	0.00564360139776644
12	POM1	249	2015	11.1629543547561	0	3.7869395385386	17	191.534367068585	31	2	3.16	5.74	3.16	7.21	4.32	0.152767275071839	0.474500314417849	0	0.00564360139776644
12	POM1	250	2015	12.5783429884298	0.132291481137422	2.80283143407415	17	191.534367068585	31	2	3.16	5.74	3.16	7.21	4.32	0.152767275071839	0.474500314417849	0	0.00564360139776644
12	POM1	251	2015	13.6765657870659	0	2.05905167659029	17	191.534367068585	31	2	3.16	5.74	3.16	7.21	4.32	0.152767275071839	0.474500314417849	0	0.00564360139776644
13	POM1	252	2015	14.4880469200707	0	2.92859042912546	17	191.534367068585	31	2	3.16	5.74	3.16	7.21	4.32	0.152767275071839	0.474500314417849	0	0.00564360139776644
13	POM1	253	2015	13.0247336549693	0	3.53788136208824	17	191.534367068585	31	2	3.16	5.74	3.16	7.21	4.32	0.152767275071839	0.474500314417849	0	0.00564360139776644
13	POM1	254	2015	13.488676934363	0	2.38833623049107	17	191.534367068585	31	2	3.16	5.74	3.16	7.21	4.32	0.152767275071839	0.474500314417849	0	0.00564360139776644
13	POM1	255	2015	16.6886374746923	0	2.81356161827376	17	191.534367068585	31	2	3.16	5.74	3.16	7.21	4.32	0.152767275071839	0.474500314417849	0	0.00564360139776644
13	POM1	256	2015	16.4214868982744	4.4058549361782	2.88757339098382	17	191.534367068585	31	2	3.16	5.74	3.16	7.21	4.32	0.152767275071839	0.474500314417849	0	0.00564360139776644
13	POM1	257	2015	14.8775575843118	5.71547524805851	4.28761022083791	17	191.534367068585	31	2	3.16	5.74	3.16	7.21	4.32	0.152767275071839	0.474500314417849	0	0.00564360139776644
13	POM1	258	2015	12.2226731363585	12.3260189198447	4.43875373990943	17	191.534367068585	31	2	3.16	5.74	3.16	7.21	4.32	0.152767275071839	0.474500314417849	0	0.00564360139776644
13	POM1	259	2015	14.6035050258679	18.2412206602731	4.53152849152428	17	191.534367068585	31	2	3.16	5.74	3.16	7.21	4.32	0.152767275071839	0.474500314417849	0	0.00564360139776644
13	POM1	260	2015	14.0607025245283	0	4.67937027761123	17	191.534367068585	31	2	3.16	5.74	3.16	7.21	4.32	0.152767275071839	0.474500314417849	0	0.00564360139776644
13	POM1	261	2015	13.733090499719	0.453451526517375	3.03088879467657	17	191.534367068585	31	2	3.16	5.74	3.16	7.21	4.32	0.152767275071839	0.474500314417849	0	0.00564360139776644
13	POM1	262	2015	13.1917374240859	0.940030433264136	2.11952169409938	17	191.534367068585	31	2	3.16	5.74	3.16	7.21	4.32	0.152767275071839	0.474500314417849	0	0.00564360139776644
13	POM1	263	2015	12.6241464537719	0	1.87025275448796	17	191.534367068585	31	2	3.16	5.74	3.16	7.21	4.32	0.152767275071839	0.474500314417849	0	0.00564360139776644
13	POM1	264	2015	12.7879715162637	0	1.84831827489546	17	191.534367068585	31	2	3.16	5.74	3.16	7.21	4.32	0.152767275071839	0.474500314417849	0	0.00564360139776644
13	POM1	265	2015	11.9567046628324	8.26815252918415	3.30097453044604	17	191.534367068585	31	2	3.16	5.74	3.16	7.21	4.32	0.152767275071839	0.474500314417849	0	0.00564360139776644
13	POM1	266	2015	11.0212661106098	2.28823746117137	2.95927010929069	17	191.534367068585	31	2	3.16	5.74	3.16	7.21	4.32	0.152767275071839	0.474500314417849	0	0.00564360139776644
13	POM1	267	2015	12.5018615830198	0	3.04665463546486	17	191.534367068585	31	2	3.16	5.74	3.16	7.21	4.32	0.152767275071839	0.474500314417849	0	0.00564360139776644
13	POM1	268	2015	13.7360388590519	0	1.86958415314719	17	191.534367068585	31	2	3.16	5.74	3.16	7.21	4.32	0.152767275071839	0.474500314417849	0	0.00564360139776644
13	POM1	269	2015	12.1046765769064	0	2.48015700220569	17	191.534367068585	31	2	3.16	5.74	3.16	7.21	4.32	0.152767275071839	0.474500314417849	0	0.00564360139776644
13	POM1	270	2015	11.3673426360106	0	3.09949950996004	17	191.534367068585	31	2	3.16	5.74	3.16	7.21	4.32	0.152767275071839	0.474500314417849	0	0.00564360139776644
13	POM1	271	2015	10.6698133652432	0	3.11514577218522	17	191.534367068585	31	2	3.16	5.74	3.16	7.21	4.32	0.152767275071839	0.474500314417849	0	0.00564360139776644
13	POM1	272	2015	11.3189347743931	0	4.1628266797356	17	191.534367068585	31	2	3.16	5.74	3.16	7.21	4.32	0.152767275071839	0.474500314417849	0	0.00564360139776644
13	POM1	273	2015	10.767963566563	0	4.12915323343411	17	191.534367068585	31	2	3.16	5.74	3.16	7.21	4.32	0.152767275071839	0.474500314417849	0	0.00564360139776644
13	POM1	274	2015	9.39515747068451	0	3.54902283471673	17	191.534367068585	31	2	3.16	5.74	3.16	7.21	4.32	0.152767275071839	0.474500314417849	0	0.00564360139776644
13	POM1	275	2015	10.8816157289335	0	2.65742680213352	17	191.534367068585	31	2	3.16	5.74	3.16	7.21	4.32	0.152767275071839	0.474500314417849	0	0.00564360139776644
13	POM1	276	2015	12.9671815502855	1.10347726282888	1.81409129219304	17	191.534367068585	31	2	3.16	5.74	3.16	7.21	4.32	0.152767275071839	0.474500314417849	0	0.00564360139776644
13	POM1	277	2015	12.3571583678894	0	2.0264617023961	17	191.534367068585	31	2	3.16	5.74	3.16	7.21	4.32	0.152767275071839	0.474500314417849	0	0.00564360139776644
13	POM1	278	2015	12.2954868115442	3.91376902829383	3.0024019914312	17	191.534367068585	31	2	3.16	5.74	3.16	7.21	4.32	0.152767275071839	0.474500314417849	0	0.00564360139776644
13	POM1	279	2015	15.8305608332405	1.06979347318493	3.23059890198501	17	191.534367068585	31	2	3.16	5.74	3.16	7.21	4.32	0.152767275071839	0.474500314417849	0	0.00564360139776644
13	POM1	280	2015	13.6349322150728	0	3.44336552822628	17	191.534367068585	31	2	3.16	5.74	3.16	7.21	4.32	0.152767275071839	0.474500314417849	0	0.00564360139776644
13	POM1	281	2015	12.3234023263468	0	1.87787856556216	17	191.534367068585	31	2	3.16	5.74	3.16	7.21	4.32	0.152767275071839	0.474500314417849	0	0.00564360139776644
13	POM1	282	2015	11.300670262659	0.161447789692712	1.85611816941545	17	191.534367068585	31	2	3.16	5.74	3.16	7.21	4.32	0.152767275071839	0.474500314417849	0	0.00564360139776644
13	POM1	283	2015	10.9409050371014	0	2.77277473427338	17	191.534367068585	31	2	3.16	5.74	3.16	7.21	4.32	0.152767275071839	0.474500314417849	0	0.00564360139776644
14	POM1	284	2015	7.59070627614028	0	3.47374690741733	17	191.534367068585	31	2	3.16	5.74	3.16	7.21	4.32	0.152767275071839	0.474500314417849	0	0.00564360139776644
14	POM1	285	2015	5.13703122675878	0	2.68720515471323	17	191.534367068585	31	2	3.16	5.74	3.16	7.21	4.32	0.152767275071839	0.474500314417849	0	0.00564360139776644
14	POM1	286	2015	3.63487481284446	5.23773383532828	2.38986311141602	17	191.534367068585	31	2	3.16	5.74	3.16	7.21	4.32	0.152767275071839	0.474500314417849	0	0.00564360139776644
14	POM1	287	2015	2.48211337122165	1.27545416343067	1.91420633974178	17	191.534367068585	31	2	3.16	5.74	3.16	7.21	4.32	0.152767275071839	0.474500314417849	0	0.00564360139776644
14	POM1	288	2015	3.28457857780824	3.77562735237499	2.36968171993148	17	191.534367068585	31	2	3.16	5.74	3.16	7.21	4.32	0.152767275071839	0.474500314417849	0	0.00564360139776644
14	POM1	289	2015	5.009822268633	0	1.46747945692233	17	191.534367068585	31	2	3.16	5.74	3.16	7.21	4.32	0.152767275071839	0.474500314417849	0	0.00564360139776644
14	POM1	290	2015	5.3907480806481	0	1.54458228097274	17	191.534367068585	31	2	3.16	5.74	3.16	7.21	4.32	0.152767275071839	0.474500314417849	0	0.00564360139776644
14	POM1	291	2015	6.01562352616827	0	1.0105950448108	17	191.534367068585	31	2	3.16	5.74	3.16	7.21	4.32	0.152767275071839	0.474500314417849	0	0.00564360139776644
14	POM1	292	2015	7.41355326679418	0	1.02308012656136	17	191.534367068585	31	2	3.16	5.74	3.16	7.21	4.32	0.152767275071839	0.474500314417849	0	0.00564360139776644
14	POM1	293	2015	8.49276588722629	0	1.5513159806697	17	191.534367068585	31	2	3.16	5.74	3.16	7.21	4.32	0.152767275071839	0.474500314417849	0	0.00564360139776644
14	POM1	294	2015	9.06794003583977	0	1.67350224501533	17	191.534367068585	31	2	3.16	5.74	3.16	7.21	4.32	0.152767275071839	0.474500314417849	0	0.00564360139776644
14	POM1	295	2015	9.80946433582643	0.139939032363346	3.08292711671178	17	191.534367068585	31	2	3.16	5.74	3.16	7.21	4.32	0.152767275071839	0.474500314417849	0	0.00564360139776644
14	POM1	296	2015	10.6947176538464	0	1.6066324487939	17	191.534367068585	31	2	3.16	5.74	3.16	7.21	4.32	0.152767275071839	0.474500314417849	0	0.00564360139776644
14	POM1	297	2015	10.9688533404814	0	2.09712623588222	17	191.534367068585	31	2	3.16	5.74	3.16	7.21	4.32	0.152767275071839	0.474500314417849	0	0.00564360139776644
14	POM1	298	2015	11.6585056061446	0	1.6983351093318	17	191.534367068585	31	2	3.16	5.74	3.16	7.21	4.32	0.152767275071839	0.474500314417849	0	0.00564360139776644
14	POM1	299	2015	10.0446378379982	0	2.97650285052968	17	191.534367068585	31	2	3.16	5.74	3.16	7.21	4.32	0.152767275071839	0.474500314417849	0	0.00564360139776644
14	POM1	300	2015	8.46789821866344	0	2.54246018849861	17	191.534367068585	31	2	3.16	5.74	3.16	7.21	4.32	0.152767275071839	0.474500314417849	0	0.00564360139776644
14	POM1	301	2015	8.39940171072342	0	2.53275517178735	17	191.534367068585	31	2	3.16	5.74	3.16	7.21	4.32	0.152767275071839	0.474500314417849	0	0.00564360139776644
14	POM1	302	2015	10.3566409329984	0	1.64984989137992	17	191.534367068585	31	2	3.16	5.74	3.16	7.21	4.32	0.152767275071839	0.474500314417849	0	0.00564360139776644
14	POM1	303	2015	8.31097641928066	0	2.54622656709697	17	191.534367068585	31	2	3.16	5.74	3.16	7.21	4.32	0.152767275071839	0.474500314417849	0	0.00564360139776644
15	LIN1	103	2016	8.70835052880525	0	1.72387592814163	10	552.545291992019	17	0	5.53	4.65	5	6.76	3.35	0.750374474781712	0.608661988449141	0.0329159635261626	2.23352878081477e-11
15	LIN1	104	2016	10.2416766535162	4.67947819787359	2.12649054107826	10	552.545291992019	17	0	5.53	4.65	5	6.76	3.35	0.750374474781712	0.608661988449141	0.0329159635261626	2.23352878081477e-11
15	LIN1	105	2016	11.4297695138371	0.0731933786550352	4.57463826925365	10	552.545291992019	17	0	5.53	4.65	5	6.76	3.35	0.750374474781712	0.608661988449141	0.0329159635261626	2.23352878081477e-11
15	LIN1	106	2016	9.49474280046507	2.39217332617962	4.43713244245803	10	552.545291992019	17	0	5.53	4.65	5	6.76	3.35	0.750374474781712	0.608661988449141	0.0329159635261626	2.23352878081477e-11
15	LIN1	107	2016	5.93651341352586	0.035025237578314	2.91647094282858	10	552.545291992019	17	0	5.53	4.65	5	6.76	3.35	0.750374474781712	0.608661988449141	0.0329159635261626	2.23352878081477e-11
15	LIN1	108	2016	6.84036057028159	0	3.05470208007715	10	552.545291992019	17	0	5.53	4.65	5	6.76	3.35	0.750374474781712	0.608661988449141	0.0329159635261626	2.23352878081477e-11
15	LIN1	109	2016	8.71025474666489	0	3.54683731215385	10	552.545291992019	17	0	5.53	4.65	5	6.76	3.35	0.750374474781712	0.608661988449141	0.0329159635261626	2.23352878081477e-11
15	LIN1	110	2016	8.16971098625893	0	2.57103638075348	10	552.545291992019	17	0	5.53	4.65	5	6.76	3.35	0.750374474781712	0.608661988449141	0.0329159635261626	2.23352878081477e-11
15	LIN1	111	2016	12.3365219193524	0	2.61639288628093	10	552.545291992019	17	0	5.53	4.65	5	6.76	3.35	0.750374474781712	0.608661988449141	0.0329159635261626	2.23352878081477e-11
15	LIN1	112	2016	10.7433103048075	0.84087199530402	3.04461528926578	10	552.545291992019	17	0	5.53	4.65	5	6.76	3.35	0.750374474781712	0.608661988449141	0.0329159635261626	2.23352878081477e-11
15	LIN1	113	2016	5.38800513756429	0.638054469628735	3.73384368387625	10	552.545291992019	17	0	5.53	4.65	5	6.76	3.35	0.750374474781712	0.608661988449141	0.0329159635261626	2.23352878081477e-11
15	LIN1	114	2016	2.95433778488378	1.7129988427791	3.85429945626741	10	552.545291992019	17	0	5.53	4.65	5	6.76	3.35	0.750374474781712	0.608661988449141	0.0329159635261626	2.23352878081477e-11
15	LIN1	115	2016	2.97623171082351	17.3022665235404	4.45253717481949	10	552.545291992019	17	0	5.53	4.65	5	6.76	3.35	0.750374474781712	0.608661988449141	0.0329159635261626	2.23352878081477e-11
15	LIN1	116	2016	2.31865549668043	6.27889780362414	5.49712932247451	10	552.545291992019	17	0	5.53	4.65	5	6.76	3.35	0.750374474781712	0.608661988449141	0.0329159635261626	2.23352878081477e-11
15	LIN1	117	2016	3.25204846845179	8.82853123047926	5.62654120745328	10	552.545291992019	17	0	5.53	4.65	5	6.76	3.35	0.750374474781712	0.608661988449141	0.0329159635261626	2.23352878081477e-11
15	LIN1	118	2016	4.27817493182775	1.18925716165498	3.14716889314332	10	552.545291992019	17	0	5.53	4.65	5	6.76	3.35	0.750374474781712	0.608661988449141	0.0329159635261626	2.23352878081477e-11
15	LIN1	119	2016	6.84619374240755	1.25566530638224	4.37775351154511	10	552.545291992019	17	0	5.53	4.65	5	6.76	3.35	0.750374474781712	0.608661988449141	0.0329159635261626	2.23352878081477e-11
15	LIN1	120	2016	6.66418558218329	4.87541559253295	2.81744993375994	10	552.545291992019	17	0	5.53	4.65	5	6.76	3.35	0.750374474781712	0.608661988449141	0.0329159635261626	2.23352878081477e-11
15	LIN1	121	2016	9.02886222004027	0	4.3716470121169	10	552.545291992019	17	0	5.53	4.65	5	6.76	3.35	0.750374474781712	0.608661988449141	0.0329159635261626	2.23352878081477e-11
15	LIN1	122	2016	12.1561408714157	1.85680106585621	1.89977375603636	10	552.545291992019	17	0	5.53	4.65	5	6.76	3.35	0.750374474781712	0.608661988449141	0.0329159635261626	2.23352878081477e-11
15	LIN1	123	2016	9.67490379704344	1.50003792243191	3.76235636063034	10	552.545291992019	17	0	5.53	4.65	5	6.76	3.35	0.750374474781712	0.608661988449141	0.0329159635261626	2.23352878081477e-11
15	LIN1	124	2016	8.93479205875195	0	2.0814681374792	10	552.545291992019	17	0	5.53	4.65	5	6.76	3.35	0.750374474781712	0.608661988449141	0.0329159635261626	2.23352878081477e-11
15	LIN1	125	2016	12.7387320973621	0	3.63911018201276	10	552.545291992019	17	0	5.53	4.65	5	6.76	3.35	0.750374474781712	0.608661988449141	0.0329159635261626	2.23352878081477e-11
15	LIN1	126	2016	16.8949966874892	0	3.76898465507735	10	552.545291992019	17	0	5.53	4.65	5	6.76	3.35	0.750374474781712	0.608661988449141	0.0329159635261626	2.23352878081477e-11
15	LIN1	127	2016	19.1562375350117	0	3.45093413258436	10	552.545291992019	17	0	5.53	4.65	5	6.76	3.35	0.750374474781712	0.608661988449141	0.0329159635261626	2.23352878081477e-11
15	LIN1	128	2016	19.5731432463036	0	4.79087180491174	10	552.545291992019	17	0	5.53	4.65	5	6.76	3.35	0.750374474781712	0.608661988449141	0.0329159635261626	2.23352878081477e-11
16	LIN1	129	2016	19.5605218672364	0	4.50739771319271	10	552.545291992019	17	0	5.53	4.65	5	6.76	3.35	0.750374474781712	0.608661988449141	0.0329159635261626	2.23352878081477e-11
16	LIN1	130	2016	18.3535601165967	0	3.09446679039157	10	552.545291992019	17	0	5.53	4.65	5	6.76	3.35	0.750374474781712	0.608661988449141	0.0329159635261626	2.23352878081477e-11
16	LIN1	131	2016	18.5051364439205	0	3.51985309743782	10	552.545291992019	17	0	5.53	4.65	5	6.76	3.35	0.750374474781712	0.608661988449141	0.0329159635261626	2.23352878081477e-11
16	LIN1	132	2016	18.5307680737785	0	3.81347024336475	10	552.545291992019	17	0	5.53	4.65	5	6.76	3.35	0.750374474781712	0.608661988449141	0.0329159635261626	2.23352878081477e-11
16	LIN1	133	2016	17.0334525545054	0	3.49395095298063	10	552.545291992019	17	0	5.53	4.65	5	6.76	3.35	0.750374474781712	0.608661988449141	0.0329159635261626	2.23352878081477e-11
16	LIN1	134	2016	8.23164957656555	0.752771246787115	5.01837346337484	10	552.545291992019	17	0	5.53	4.65	5	6.76	3.35	0.750374474781712	0.608661988449141	0.0329159635261626	2.23352878081477e-11
16	LIN1	135	2016	7.23540239913776	0.837597094153093	4.39546404161677	10	552.545291992019	17	0	5.53	4.65	5	6.76	3.35	0.750374474781712	0.608661988449141	0.0329159635261626	2.23352878081477e-11
16	LIN1	136	2016	8.05610423490899	0.157447198729652	3.12021091244725	10	552.545291992019	17	0	5.53	4.65	5	6.76	3.35	0.750374474781712	0.608661988449141	0.0329159635261626	2.23352878081477e-11
16	LIN1	137	2016	11.3974527311972	0	3.09948302603057	10	552.545291992019	17	0	5.53	4.65	5	6.76	3.35	0.750374474781712	0.608661988449141	0.0329159635261626	2.23352878081477e-11
16	LIN1	138	2016	13.5647537891775	2.6709399509787	3.07167365240164	10	552.545291992019	17	0	5.53	4.65	5	6.76	3.35	0.750374474781712	0.608661988449141	0.0329159635261626	2.23352878081477e-11
16	LIN1	139	2016	12.2932827542147	0	2.35910065476364	10	552.545291992019	17	0	5.53	4.65	5	6.76	3.35	0.750374474781712	0.608661988449141	0.0329159635261626	2.23352878081477e-11
16	LIN1	140	2016	12.9439819666414	0	3.6348751427765	10	552.545291992019	17	0	5.53	4.65	5	6.76	3.35	0.750374474781712	0.608661988449141	0.0329159635261626	2.23352878081477e-11
16	LIN1	141	2016	16.789214105421	0	3.54668013728024	10	552.545291992019	17	0	5.53	4.65	5	6.76	3.35	0.750374474781712	0.608661988449141	0.0329159635261626	2.23352878081477e-11
16	LIN1	142	2016	17.4576793610411	4.80957703653749	3.75768690919887	10	552.545291992019	17	0	5.53	4.65	5	6.76	3.35	0.750374474781712	0.608661988449141	0.0329159635261626	2.23352878081477e-11
16	LIN1	143	2016	11.3102744875072	5.49424044207762	4.24473293856297	10	552.545291992019	17	0	5.53	4.65	5	6.76	3.35	0.750374474781712	0.608661988449141	0.0329159635261626	2.23352878081477e-11
16	LIN1	144	2016	9.79611440450387	0.0336537096359992	3.69769178718497	10	552.545291992019	17	0	5.53	4.65	5	6.76	3.35	0.750374474781712	0.608661988449141	0.0329159635261626	2.23352878081477e-11
16	LIN1	145	2016	11.6250675537424	0	1.61756689269355	10	552.545291992019	17	0	5.53	4.65	5	6.76	3.35	0.750374474781712	0.608661988449141	0.0329159635261626	2.23352878081477e-11
16	LIN1	146	2016	15.9799523886111	0.079731212003973	1.80876086358533	10	552.545291992019	17	0	5.53	4.65	5	6.76	3.35	0.750374474781712	0.608661988449141	0.0329159635261626	2.23352878081477e-11
16	LIN1	147	2016	17.0804695592778	2.11705805196691	2.23930840926231	10	552.545291992019	17	0	5.53	4.65	5	6.76	3.35	0.750374474781712	0.608661988449141	0.0329159635261626	2.23352878081477e-11
16	LIN1	148	2016	17.8312955100618	0.623907002690412	1.87193811869344	10	552.545291992019	17	0	5.53	4.65	5	6.76	3.35	0.750374474781712	0.608661988449141	0.0329159635261626	2.23352878081477e-11
16	LIN1	149	2016	18.0652656428152	13.0051679810035	2.73310938448668	10	552.545291992019	17	0	5.53	4.65	5	6.76	3.35	0.750374474781712	0.608661988449141	0.0329159635261626	2.23352878081477e-11
16	LIN1	150	2016	16.7108042124554	10.4134001186556	3.61893871702206	10	552.545291992019	17	0	5.53	4.65	5	6.76	3.35	0.750374474781712	0.608661988449141	0.0329159635261626	2.23352878081477e-11
16	LIN1	151	2016	16.020192551341	2.41552697245372	2.98855079104978	10	552.545291992019	17	0	5.53	4.65	5	6.76	3.35	0.750374474781712	0.608661988449141	0.0329159635261626	2.23352878081477e-11
16	LIN1	152	2016	15.4170256868944	31.4915791951687	2.58436763045149	10	552.545291992019	17	0	5.53	4.65	5	6.76	3.35	0.750374474781712	0.608661988449141	0.0329159635261626	2.23352878081477e-11
16	LIN1	153	2016	17.4072680012516	6.77977396827419	2.41265734053948	10	552.545291992019	17	0	5.53	4.65	5	6.76	3.35	0.750374474781712	0.608661988449141	0.0329159635261626	2.23352878081477e-11
16	LIN1	154	2016	16.7388123443109	12.4176701725484	2.13140859542226	10	552.545291992019	17	0	5.53	4.65	5	6.76	3.35	0.750374474781712	0.608661988449141	0.0329159635261626	2.23352878081477e-11
16	LIN1	155	2016	17.7802658520672	4.54694737009003	2.37806434777235	10	552.545291992019	17	0	5.53	4.65	5	6.76	3.35	0.750374474781712	0.608661988449141	0.0329159635261626	2.23352878081477e-11
16	LIN1	156	2016	19.1902013838209	2.43217456660593	2.19454527166409	10	552.545291992019	17	0	5.53	4.65	5	6.76	3.35	0.750374474781712	0.608661988449141	0.0329159635261626	2.23352878081477e-11
16	LIN1	157	2016	20.0116336887958	0.208727648635432	2.1692634948014	10	552.545291992019	17	0	5.53	4.65	5	6.76	3.35	0.750374474781712	0.608661988449141	0.0329159635261626	2.23352878081477e-11
17	LIN1	158	2016	18.9322092528215	8.82845010235655	1.99987864064591	10	552.545291992019	17	0	5.53	4.65	5	6.76	3.35	0.750374474781712	0.608661988449141	0.0329159635261626	2.23352878081477e-11
17	LIN1	159	2016	17.8769523465743	0	2.90731692016405	10	552.545291992019	17	0	5.53	4.65	5	6.76	3.35	0.750374474781712	0.608661988449141	0.0329159635261626	2.23352878081477e-11
17	LIN1	160	2016	14.791871497544	0	2.81908478426081	10	552.545291992019	17	0	5.53	4.65	5	6.76	3.35	0.750374474781712	0.608661988449141	0.0329159635261626	2.23352878081477e-11
17	LIN1	161	2016	15.6944972739349	0	2.14382856680741	10	552.545291992019	17	0	5.53	4.65	5	6.76	3.35	0.750374474781712	0.608661988449141	0.0329159635261626	2.23352878081477e-11
17	LIN1	162	2016	16.6955561713226	3.17430797972423	1.83762472428873	10	552.545291992019	17	0	5.53	4.65	5	6.76	3.35	0.750374474781712	0.608661988449141	0.0329159635261626	2.23352878081477e-11
17	LIN1	163	2016	15.7873701966199	9.00003055854848	1.91018462046876	10	552.545291992019	17	0	5.53	4.65	5	6.76	3.35	0.750374474781712	0.608661988449141	0.0329159635261626	2.23352878081477e-11
17	LIN1	164	2016	15.0002507205461	10.5127578536976	2.79949848592103	10	552.545291992019	17	0	5.53	4.65	5	6.76	3.35	0.750374474781712	0.608661988449141	0.0329159635261626	2.23352878081477e-11
17	LIN1	165	2016	14.5150336109623	8.82985741833157	2.98987895613871	10	552.545291992019	17	0	5.53	4.65	5	6.76	3.35	0.750374474781712	0.608661988449141	0.0329159635261626	2.23352878081477e-11
17	LIN1	166	2016	13.1363958718148	7.86079543423803	2.67227904244917	10	552.545291992019	17	0	5.53	4.65	5	6.76	3.35	0.750374474781712	0.608661988449141	0.0329159635261626	2.23352878081477e-11
17	LIN1	167	2016	13.4028239115288	1.19865861685651	2.03778549846123	10	552.545291992019	17	0	5.53	4.65	5	6.76	3.35	0.750374474781712	0.608661988449141	0.0329159635261626	2.23352878081477e-11
17	LIN1	168	2016	13.6679082878774	5.13862260791043	3.04455741955437	10	552.545291992019	17	0	5.53	4.65	5	6.76	3.35	0.750374474781712	0.608661988449141	0.0329159635261626	2.23352878081477e-11
17	LIN1	169	2016	13.3615165988066	10.1533459076376	3.32415572474348	10	552.545291992019	17	0	5.53	4.65	5	6.76	3.35	0.750374474781712	0.608661988449141	0.0329159635261626	2.23352878081477e-11
17	LIN1	170	2016	12.8927064423216	0	2.66482399880058	10	552.545291992019	17	0	5.53	4.65	5	6.76	3.35	0.750374474781712	0.608661988449141	0.0329159635261626	2.23352878081477e-11
17	LIN1	171	2016	14.5864925045304	12.6746468796358	3.89798868119654	10	552.545291992019	17	0	5.53	4.65	5	6.76	3.35	0.750374474781712	0.608661988449141	0.0329159635261626	2.23352878081477e-11
17	LIN1	172	2016	17.2745860375714	0.131299033409007	2.96765248581259	10	552.545291992019	17	0	5.53	4.65	5	6.76	3.35	0.750374474781712	0.608661988449141	0.0329159635261626	2.23352878081477e-11
17	LIN1	173	2016	19.8972781822315	0	2.22719697604125	10	552.545291992019	17	0	5.53	4.65	5	6.76	3.35	0.750374474781712	0.608661988449141	0.0329159635261626	2.23352878081477e-11
17	LIN1	174	2016	25.1936539222893	0	3.41939734438342	10	552.545291992019	17	0	5.53	4.65	5	6.76	3.35	0.750374474781712	0.608661988449141	0.0329159635261626	2.23352878081477e-11
17	LIN1	175	2016	21.536323893104	7.21428524078672	2.64107566964169	10	552.545291992019	17	0	5.53	4.65	5	6.76	3.35	0.750374474781712	0.608661988449141	0.0329159635261626	2.23352878081477e-11
17	LIN1	176	2016	15.6005767359638	21.907581810974	2.91949470836061	10	552.545291992019	17	0	5.53	4.65	5	6.76	3.35	0.750374474781712	0.608661988449141	0.0329159635261626	2.23352878081477e-11
17	LIN1	177	2016	13.8261218736225	3.20917657412444	3.18194235692368	10	552.545291992019	17	0	5.53	4.65	5	6.76	3.35	0.750374474781712	0.608661988449141	0.0329159635261626	2.23352878081477e-11
17	LIN1	178	2016	13.8664555670771	7.32836828344858	3.45903501026333	10	552.545291992019	17	0	5.53	4.65	5	6.76	3.35	0.750374474781712	0.608661988449141	0.0329159635261626	2.23352878081477e-11
17	LIN1	179	2016	16.9377785491812	4.46624384080731	2.3755923868649	10	552.545291992019	17	0	5.53	4.65	5	6.76	3.35	0.750374474781712	0.608661988449141	0.0329159635261626	2.23352878081477e-11
17	LIN1	180	2016	16.7728094328129	1.8581880456017	4.07142352771564	10	552.545291992019	17	0	5.53	4.65	5	6.76	3.35	0.750374474781712	0.608661988449141	0.0329159635261626	2.23352878081477e-11
17	LIN1	181	2016	16.429729902272	5.66735635234736	3.58179403660628	10	552.545291992019	17	0	5.53	4.65	5	6.76	3.35	0.750374474781712	0.608661988449141	0.0329159635261626	2.23352878081477e-11
18	LIN1	182	2016	17.7624595293729	3.88335954908345	4.24870585066335	10	552.545291992019	17	0	5.53	4.65	5	6.76	3.35	0.750374474781712	0.608661988449141	0.0329159635261626	2.23352878081477e-11
18	LIN1	183	2016	13.6914956715773	1.23905759119328	4.1746244624198	10	552.545291992019	17	0	5.53	4.65	5	6.76	3.35	0.750374474781712	0.608661988449141	0.0329159635261626	2.23352878081477e-11
18	LIN1	184	2016	13.9075452692601	1.44325152676434	3.23617742121498	10	552.545291992019	17	0	5.53	4.65	5	6.76	3.35	0.750374474781712	0.608661988449141	0.0329159635261626	2.23352878081477e-11
18	LIN1	185	2016	15.8868930101375	0	2.11070498987082	10	552.545291992019	17	0	5.53	4.65	5	6.76	3.35	0.750374474781712	0.608661988449141	0.0329159635261626	2.23352878081477e-11
18	LIN1	186	2016	16.3466172702058	1.43280371067558	4.1845737049309	10	552.545291992019	17	0	5.53	4.65	5	6.76	3.35	0.750374474781712	0.608661988449141	0.0329159635261626	2.23352878081477e-11
18	LIN1	187	2016	14.6589599622768	0	3.48032809417671	10	552.545291992019	17	0	5.53	4.65	5	6.76	3.35	0.750374474781712	0.608661988449141	0.0329159635261626	2.23352878081477e-11
18	LIN1	188	2016	16.4016910140868	0	1.87399645526265	10	552.545291992019	17	0	5.53	4.65	5	6.76	3.35	0.750374474781712	0.608661988449141	0.0329159635261626	2.23352878081477e-11
18	LIN1	189	2016	19.1319465403705	0	3.55170692768558	10	552.545291992019	17	0	5.53	4.65	5	6.76	3.35	0.750374474781712	0.608661988449141	0.0329159635261626	2.23352878081477e-11
18	LIN1	190	2016	19.2650527256465	0	3.19321125084026	10	552.545291992019	17	0	5.53	4.65	5	6.76	3.35	0.750374474781712	0.608661988449141	0.0329159635261626	2.23352878081477e-11
18	LIN1	191	2016	22.7506118666647	0	3.46911138587758	10	552.545291992019	17	0	5.53	4.65	5	6.76	3.35	0.750374474781712	0.608661988449141	0.0329159635261626	2.23352878081477e-11
18	LIN1	192	2016	19.7303136969445	0	4.17777714229764	10	552.545291992019	17	0	5.53	4.65	5	6.76	3.35	0.750374474781712	0.608661988449141	0.0329159635261626	2.23352878081477e-11
18	LIN1	193	2016	17.0670305558836	1.45063154406642	3.0369087892974	10	552.545291992019	17	0	5.53	4.65	5	6.76	3.35	0.750374474781712	0.608661988449141	0.0329159635261626	2.23352878081477e-11
18	LIN1	194	2016	13.5909815996834	4.18935790783461	2.76895613618177	10	552.545291992019	17	0	5.53	4.65	5	6.76	3.35	0.750374474781712	0.608661988449141	0.0329159635261626	2.23352878081477e-11
18	LIN1	195	2016	13.6558880665008	0	3.64063734707409	10	552.545291992019	17	0	5.53	4.65	5	6.76	3.35	0.750374474781712	0.608661988449141	0.0329159635261626	2.23352878081477e-11
18	LIN1	196	2016	14.816059713793	0	3.32486781464277	10	552.545291992019	17	0	5.53	4.65	5	6.76	3.35	0.750374474781712	0.608661988449141	0.0329159635261626	2.23352878081477e-11
18	LIN1	197	2016	16.5056073245131	0	2.39737526835962	10	552.545291992019	17	0	5.53	4.65	5	6.76	3.35	0.750374474781712	0.608661988449141	0.0329159635261626	2.23352878081477e-11
18	LIN1	198	2016	19.6372802849909	1.18491884385093	2.93711346235245	10	552.545291992019	17	0	5.53	4.65	5	6.76	3.35	0.750374474781712	0.608661988449141	0.0329159635261626	2.23352878081477e-11
18	LIN1	199	2016	20.6299155154961	0	2.10819862810024	10	552.545291992019	17	0	5.53	4.65	5	6.76	3.35	0.750374474781712	0.608661988449141	0.0329159635261626	2.23352878081477e-11
18	LIN1	200	2016	23.2369177716083	0	1.83345857789611	10	552.545291992019	17	0	5.53	4.65	5	6.76	3.35	0.750374474781712	0.608661988449141	0.0329159635261626	2.23352878081477e-11
18	LIN1	201	2016	24.484802934933	7.37407319598939	3.25501427580048	10	552.545291992019	17	0	5.53	4.65	5	6.76	3.35	0.750374474781712	0.608661988449141	0.0329159635261626	2.23352878081477e-11
18	LIN1	202	2016	21.8947251644266	2.10334884516368	2.622988746269	10	552.545291992019	17	0	5.53	4.65	5	6.76	3.35	0.750374474781712	0.608661988449141	0.0329159635261626	2.23352878081477e-11
18	LIN1	203	2016	21.8266682382045	0	2.38194873602645	10	552.545291992019	17	0	5.53	4.65	5	6.76	3.35	0.750374474781712	0.608661988449141	0.0329159635261626	2.23352878081477e-11
18	LIN1	204	2016	20.1701279653765	5.64286101515574	1.96684741976472	10	552.545291992019	17	0	5.53	4.65	5	6.76	3.35	0.750374474781712	0.608661988449141	0.0329159635261626	2.23352878081477e-11
18	LIN1	205	2016	21.9092861675717	0	1.82579128017998	10	552.545291992019	17	0	5.53	4.65	5	6.76	3.35	0.750374474781712	0.608661988449141	0.0329159635261626	2.23352878081477e-11
18	LIN1	206	2016	21.3042826722597	0	2.45904203266429	10	552.545291992019	17	0	5.53	4.65	5	6.76	3.35	0.750374474781712	0.608661988449141	0.0329159635261626	2.23352878081477e-11
19	LIN1	207	2016	18.6604872148789	0.899427120141253	1.8229167558644	10	552.545291992019	17	0	5.53	4.65	5	6.76	3.35	0.750374474781712	0.608661988449141	0.0329159635261626	2.23352878081477e-11
19	LIN1	208	2016	18.0908745642883	0.822015120016676	2.94151268498886	10	552.545291992019	17	0	5.53	4.65	5	6.76	3.35	0.750374474781712	0.608661988449141	0.0329159635261626	2.23352878081477e-11
19	LIN1	209	2016	17.454195601723	14.2235231634822	2.57742550235138	10	552.545291992019	17	0	5.53	4.65	5	6.76	3.35	0.750374474781712	0.608661988449141	0.0329159635261626	2.23352878081477e-11
19	LIN1	210	2016	17.3258117799794	6.24616709763515	3.22101650171658	10	552.545291992019	17	0	5.53	4.65	5	6.76	3.35	0.750374474781712	0.608661988449141	0.0329159635261626	2.23352878081477e-11
19	LIN1	211	2016	18.2957448617538	0	2.65273557176714	10	552.545291992019	17	0	5.53	4.65	5	6.76	3.35	0.750374474781712	0.608661988449141	0.0329159635261626	2.23352878081477e-11
19	LIN1	212	2016	15.4582933743183	4.54068225101085	2.57420263689657	10	552.545291992019	17	0	5.53	4.65	5	6.76	3.35	0.750374474781712	0.608661988449141	0.0329159635261626	2.23352878081477e-11
19	LIN1	213	2016	15.6399631524561	2.89460599621276	2.47851387824072	10	552.545291992019	17	0	5.53	4.65	5	6.76	3.35	0.750374474781712	0.608661988449141	0.0329159635261626	2.23352878081477e-11
19	LIN1	214	2016	15.0844312614287	26.6824653669134	3.17532392798314	10	552.545291992019	17	0	5.53	4.65	5	6.76	3.35	0.750374474781712	0.608661988449141	0.0329159635261626	2.23352878081477e-11
19	LIN1	215	2016	17.5664525914245	11.7257685762045	4.29334610794395	10	552.545291992019	17	0	5.53	4.65	5	6.76	3.35	0.750374474781712	0.608661988449141	0.0329159635261626	2.23352878081477e-11
19	LIN1	216	2016	16.478770247087	0	3.48905983482405	10	552.545291992019	17	0	5.53	4.65	5	6.76	3.35	0.750374474781712	0.608661988449141	0.0329159635261626	2.23352878081477e-11
19	LIN1	217	2016	15.164089268574	1.60857768231666	2.89068591792829	10	552.545291992019	17	0	5.53	4.65	5	6.76	3.35	0.750374474781712	0.608661988449141	0.0329159635261626	2.23352878081477e-11
19	LIN1	218	2016	16.6433646314501	0	2.85828969901466	10	552.545291992019	17	0	5.53	4.65	5	6.76	3.35	0.750374474781712	0.608661988449141	0.0329159635261626	2.23352878081477e-11
19	LIN1	219	2016	18.874342369448	0	3.17042799959423	10	552.545291992019	17	0	5.53	4.65	5	6.76	3.35	0.750374474781712	0.608661988449141	0.0329159635261626	2.23352878081477e-11
19	LIN1	220	2016	17.3531153668337	1.24374779267165	4.0293095260777	10	552.545291992019	17	0	5.53	4.65	5	6.76	3.35	0.750374474781712	0.608661988449141	0.0329159635261626	2.23352878081477e-11
19	LIN1	221	2016	13.8481277500242	0.153310862068717	2.85199465441791	10	552.545291992019	17	0	5.53	4.65	5	6.76	3.35	0.750374474781712	0.608661988449141	0.0329159635261626	2.23352878081477e-11
20	LIN1	222	2016	11.7526256911264	0.808005797229629	2.62398235293558	10	552.545291992019	17	0	5.53	4.65	5	6.76	3.35	0.750374474781712	0.608661988449141	0.0329159635261626	2.23352878081477e-11
20	LIN1	223	2016	11.0900542869628	14.7492040630109	3.54679834732723	10	552.545291992019	17	0	5.53	4.65	5	6.76	3.35	0.750374474781712	0.608661988449141	0.0329159635261626	2.23352878081477e-11
20	LIN1	224	2016	16.5667426594501	1.72339781246611	3.45347951902504	10	552.545291992019	17	0	5.53	4.65	5	6.76	3.35	0.750374474781712	0.608661988449141	0.0329159635261626	2.23352878081477e-11
20	LIN1	225	2016	18.6473285737623	0	3.50445971357957	10	552.545291992019	17	0	5.53	4.65	5	6.76	3.35	0.750374474781712	0.608661988449141	0.0329159635261626	2.23352878081477e-11
20	LIN1	226	2016	17.6828680588864	0	2.11289977654255	10	552.545291992019	17	0	5.53	4.65	5	6.76	3.35	0.750374474781712	0.608661988449141	0.0329159635261626	2.23352878081477e-11
20	LIN1	227	2016	17.2072326224318	0	2.43074543141629	10	552.545291992019	17	0	5.53	4.65	5	6.76	3.35	0.750374474781712	0.608661988449141	0.0329159635261626	2.23352878081477e-11
20	LIN1	228	2016	17.5909484057161	0	2.44634040253369	10	552.545291992019	17	0	5.53	4.65	5	6.76	3.35	0.750374474781712	0.608661988449141	0.0329159635261626	2.23352878081477e-11
20	LIN1	229	2016	18.4223088943856	0	2.53910996600457	10	552.545291992019	17	0	5.53	4.65	5	6.76	3.35	0.750374474781712	0.608661988449141	0.0329159635261626	2.23352878081477e-11
20	LIN1	230	2016	18.9020915913667	0	2.06528512244991	10	552.545291992019	17	0	5.53	4.65	5	6.76	3.35	0.750374474781712	0.608661988449141	0.0329159635261626	2.23352878081477e-11
20	LIN1	231	2016	19.2226461046319	0.277633670343646	2.244789081477	10	552.545291992019	17	0	5.53	4.65	5	6.76	3.35	0.750374474781712	0.608661988449141	0.0329159635261626	2.23352878081477e-11
20	LIN1	232	2016	18.1234415711099	0.217450999171074	3.53685754915699	10	552.545291992019	17	0	5.53	4.65	5	6.76	3.35	0.750374474781712	0.608661988449141	0.0329159635261626	2.23352878081477e-11
20	LIN1	233	2016	15.4234904807236	8.07840582813361	4.29114789675753	10	552.545291992019	17	0	5.53	4.65	5	6.76	3.35	0.750374474781712	0.608661988449141	0.0329159635261626	2.23352878081477e-11
20	LIN1	234	2016	15.9179543334451	0.661678768361946	3.17144794493506	10	552.545291992019	17	0	5.53	4.65	5	6.76	3.35	0.750374474781712	0.608661988449141	0.0329159635261626	2.23352878081477e-11
20	LIN1	235	2016	20.0287144443624	0	2.00006201756327	10	552.545291992019	17	0	5.53	4.65	5	6.76	3.35	0.750374474781712	0.608661988449141	0.0329159635261626	2.23352878081477e-11
20	LIN1	236	2016	23.4681210244255	0	3.04888215927821	10	552.545291992019	17	0	5.53	4.65	5	6.76	3.35	0.750374474781712	0.608661988449141	0.0329159635261626	2.23352878081477e-11
20	LIN1	237	2016	25.057351508944	0	3.32841165788516	10	552.545291992019	17	0	5.53	4.65	5	6.76	3.35	0.750374474781712	0.608661988449141	0.0329159635261626	2.23352878081477e-11
20	LIN1	238	2016	25.5031706363708	0	2.44160558856742	10	552.545291992019	17	0	5.53	4.65	5	6.76	3.35	0.750374474781712	0.608661988449141	0.0329159635261626	2.23352878081477e-11
20	LIN1	239	2016	25.2569570997196	1.11540613102303	2.56386182983171	10	552.545291992019	17	0	5.53	4.65	5	6.76	3.35	0.750374474781712	0.608661988449141	0.0329159635261626	2.23352878081477e-11
20	LIN1	240	2016	23.1087075701718	5.09537536551448	3.59813821569734	10	552.545291992019	17	0	5.53	4.65	5	6.76	3.35	0.750374474781712	0.608661988449141	0.0329159635261626	2.23352878081477e-11
20	LIN1	241	2016	17.0228642723175	0.301988657420277	2.75453761347366	10	552.545291992019	17	0	5.53	4.65	5	6.76	3.35	0.750374474781712	0.608661988449141	0.0329159635261626	2.23352878081477e-11
20	LIN1	242	2016	16.9042853548756	0	1.82827795266972	10	552.545291992019	17	0	5.53	4.65	5	6.76	3.35	0.750374474781712	0.608661988449141	0.0329159635261626	2.23352878081477e-11
20	LIN1	243	2016	18.3738321553853	0	2.21125450253167	10	552.545291992019	17	0	5.53	4.65	5	6.76	3.35	0.750374474781712	0.608661988449141	0.0329159635261626	2.23352878081477e-11
21	LIN1	244	2016	17.9149686504244	0	2.27312975744453	10	552.545291992019	17	0	5.53	4.65	5	6.76	3.35	0.750374474781712	0.608661988449141	0.0329159635261626	2.23352878081477e-11
21	LIN1	245	2016	18.4415274731579	0	2.3750319949019	10	552.545291992019	17	0	5.53	4.65	5	6.76	3.35	0.750374474781712	0.608661988449141	0.0329159635261626	2.23352878081477e-11
21	LIN1	246	2016	18.3181983941302	1.4047828890965	2.56946205532236	10	552.545291992019	17	0	5.53	4.65	5	6.76	3.35	0.750374474781712	0.608661988449141	0.0329159635261626	2.23352878081477e-11
21	LIN1	247	2016	17.0197723212514	11.8115298321479	4.67249846676638	10	552.545291992019	17	0	5.53	4.65	5	6.76	3.35	0.750374474781712	0.608661988449141	0.0329159635261626	2.23352878081477e-11
21	LIN1	248	2016	16.350807458815	0	3.22154021587429	10	552.545291992019	17	0	5.53	4.65	5	6.76	3.35	0.750374474781712	0.608661988449141	0.0329159635261626	2.23352878081477e-11
21	LIN1	249	2016	17.6020541461472	0	1.78219140390853	10	552.545291992019	17	0	5.53	4.65	5	6.76	3.35	0.750374474781712	0.608661988449141	0.0329159635261626	2.23352878081477e-11
21	LIN1	250	2016	19.4688525816199	0	2.38348530295348	10	552.545291992019	17	0	5.53	4.65	5	6.76	3.35	0.750374474781712	0.608661988449141	0.0329159635261626	2.23352878081477e-11
21	LIN1	251	2016	21.3472114402201	0	3.06383184914802	10	552.545291992019	17	0	5.53	4.65	5	6.76	3.35	0.750374474781712	0.608661988449141	0.0329159635261626	2.23352878081477e-11
21	LIN1	252	2016	17.7380577081412	0	2.03409001588446	10	552.545291992019	17	0	5.53	4.65	5	6.76	3.35	0.750374474781712	0.608661988449141	0.0329159635261626	2.23352878081477e-11
21	LIN1	253	2016	19.3795206625404	0	1.77078505839458	10	552.545291992019	17	0	5.53	4.65	5	6.76	3.35	0.750374474781712	0.608661988449141	0.0329159635261626	2.23352878081477e-11
21	LIN1	254	2016	18.7690015925446	0	1.63383399433693	10	552.545291992019	17	0	5.53	4.65	5	6.76	3.35	0.750374474781712	0.608661988449141	0.0329159635261626	2.23352878081477e-11
21	LIN1	255	2016	22.0120073903991	0	1.94319932132256	10	552.545291992019	17	0	5.53	4.65	5	6.76	3.35	0.750374474781712	0.608661988449141	0.0329159635261626	2.23352878081477e-11
21	LIN1	256	2016	23.8760627882846	0	2.40202169361264	10	552.545291992019	17	0	5.53	4.65	5	6.76	3.35	0.750374474781712	0.608661988449141	0.0329159635261626	2.23352878081477e-11
21	LIN1	257	2016	24.2807609378264	0	2.65568074005175	10	552.545291992019	17	0	5.53	4.65	5	6.76	3.35	0.750374474781712	0.608661988449141	0.0329159635261626	2.23352878081477e-11
22	LIN1	258	2016	23.0077315408328	0	3.47114541117311	10	552.545291992019	17	0	5.53	4.65	5	6.76	3.35	0.750374474781712	0.608661988449141	0.0329159635261626	2.23352878081477e-11
22	LIN1	259	2016	17.4237466448971	0	2.78691715122479	10	552.545291992019	17	0	5.53	4.65	5	6.76	3.35	0.750374474781712	0.608661988449141	0.0329159635261626	2.23352878081477e-11
22	LIN1	260	2016	16.1231380832475	2.90580493877738	2.39693107529217	10	552.545291992019	17	0	5.53	4.65	5	6.76	3.35	0.750374474781712	0.608661988449141	0.0329159635261626	2.23352878081477e-11
22	LIN1	261	2016	16.1956075014675	0	3.32258906358107	10	552.545291992019	17	0	5.53	4.65	5	6.76	3.35	0.750374474781712	0.608661988449141	0.0329159635261626	2.23352878081477e-11
22	LIN1	262	2016	14.4864457948031	0	2.02874546622905	10	552.545291992019	17	0	5.53	4.65	5	6.76	3.35	0.750374474781712	0.608661988449141	0.0329159635261626	2.23352878081477e-11
22	LIN1	263	2016	14.1923732645078	0.0273024026120652	1.41856497442846	10	552.545291992019	17	0	5.53	4.65	5	6.76	3.35	0.750374474781712	0.608661988449141	0.0329159635261626	2.23352878081477e-11
22	LIN1	264	2016	14.3841049808538	0	1.95465597132468	10	552.545291992019	17	0	5.53	4.65	5	6.76	3.35	0.750374474781712	0.608661988449141	0.0329159635261626	2.23352878081477e-11
22	LIN1	265	2016	13.5172653528724	0	1.77757226409178	10	552.545291992019	17	0	5.53	4.65	5	6.76	3.35	0.750374474781712	0.608661988449141	0.0329159635261626	2.23352878081477e-11
22	LIN1	266	2016	14.5111334926979	0	1.91716676942807	10	552.545291992019	17	0	5.53	4.65	5	6.76	3.35	0.750374474781712	0.608661988449141	0.0329159635261626	2.23352878081477e-11
22	LIN1	267	2016	15.9988204647385	0	2.41047197590494	10	552.545291992019	17	0	5.53	4.65	5	6.76	3.35	0.750374474781712	0.608661988449141	0.0329159635261626	2.23352878081477e-11
22	LIN1	268	2016	17.7796726705613	0.108769579559151	3.47487906550115	10	552.545291992019	17	0	5.53	4.65	5	6.76	3.35	0.750374474781712	0.608661988449141	0.0329159635261626	2.23352878081477e-11
22	LIN1	269	2016	14.6404892531776	0	1.86161614423021	10	552.545291992019	17	0	5.53	4.65	5	6.76	3.35	0.750374474781712	0.608661988449141	0.0329159635261626	2.23352878081477e-11
22	LIN1	270	2016	15.1136765339913	0	1.68981258179112	10	552.545291992019	17	0	5.53	4.65	5	6.76	3.35	0.750374474781712	0.608661988449141	0.0329159635261626	2.23352878081477e-11
22	LIN1	271	2016	15.7122540170594	0	4.41591873736088	10	552.545291992019	17	0	5.53	4.65	5	6.76	3.35	0.750374474781712	0.608661988449141	0.0329159635261626	2.23352878081477e-11
22	LIN1	272	2016	17.7137690369684	0.698718743582379	5.54841017455833	10	552.545291992019	17	0	5.53	4.65	5	6.76	3.35	0.750374474781712	0.608661988449141	0.0329159635261626	2.23352878081477e-11
23	LIN1	273	2016	13.9217279861918	3.68017088034939	3.04298744601813	10	552.545291992019	17	0	5.53	4.65	5	6.76	3.35	0.750374474781712	0.608661988449141	0.0329159635261626	2.23352878081477e-11
23	LIN1	274	2016	12.5452310547007	1.69533831659301	2.39218058108643	10	552.545291992019	17	0	5.53	4.65	5	6.76	3.35	0.750374474781712	0.608661988449141	0.0329159635261626	2.23352878081477e-11
23	LIN1	275	2016	11.3838465336159	6.23471489283094	4.46159273468125	10	552.545291992019	17	0	5.53	4.65	5	6.76	3.35	0.750374474781712	0.608661988449141	0.0329159635261626	2.23352878081477e-11
23	LIN1	276	2016	12.2226425797083	2.54308672000689	2.99888223443611	10	552.545291992019	17	0	5.53	4.65	5	6.76	3.35	0.750374474781712	0.608661988449141	0.0329159635261626	2.23352878081477e-11
23	LIN1	277	2016	10.9989280738161	0	3.19134780598113	10	552.545291992019	17	0	5.53	4.65	5	6.76	3.35	0.750374474781712	0.608661988449141	0.0329159635261626	2.23352878081477e-11
23	LIN1	278	2016	8.97514169456773	0	4.12695855960663	10	552.545291992019	17	0	5.53	4.65	5	6.76	3.35	0.750374474781712	0.608661988449141	0.0329159635261626	2.23352878081477e-11
23	LIN1	279	2016	7.1728361068589	0.0187919686304034	3.47246604033677	10	552.545291992019	17	0	5.53	4.65	5	6.76	3.35	0.750374474781712	0.608661988449141	0.0329159635261626	2.23352878081477e-11
23	LIN1	280	2016	10.4230943769379	0.124993505356576	2.92692426150958	10	552.545291992019	17	0	5.53	4.65	5	6.76	3.35	0.750374474781712	0.608661988449141	0.0329159635261626	2.23352878081477e-11
23	LIN1	281	2016	8.99807769022453	0	2.48295132295394	10	552.545291992019	17	0	5.53	4.65	5	6.76	3.35	0.750374474781712	0.608661988449141	0.0329159635261626	2.23352878081477e-11
23	LIN1	282	2016	7.48730936632687	0	1.63968420277239	10	552.545291992019	17	0	5.53	4.65	5	6.76	3.35	0.750374474781712	0.608661988449141	0.0329159635261626	2.23352878081477e-11
23	LIN1	283	2016	7.46996136728958	1.19475680390759	1.38856861392312	10	552.545291992019	17	0	5.53	4.65	5	6.76	3.35	0.750374474781712	0.608661988449141	0.0329159635261626	2.23352878081477e-11
23	LIN1	284	2016	6.81516638210551	1.4640273982523	1.82417154843069	10	552.545291992019	17	0	5.53	4.65	5	6.76	3.35	0.750374474781712	0.608661988449141	0.0329159635261626	2.23352878081477e-11
23	LIN1	285	2016	7.66218714139744	0.129786823905356	2.95434628638423	10	552.545291992019	17	0	5.53	4.65	5	6.76	3.35	0.750374474781712	0.608661988449141	0.0329159635261626	2.23352878081477e-11
23	LIN1	286	2016	7.75998090680536	0	4.72264249713505	10	552.545291992019	17	0	5.53	4.65	5	6.76	3.35	0.750374474781712	0.608661988449141	0.0329159635261626	2.23352878081477e-11
23	LIN1	287	2016	9.89468238048327	0.495399267465723	3.98006605822439	10	552.545291992019	17	0	5.53	4.65	5	6.76	3.35	0.750374474781712	0.608661988449141	0.0329159635261626	2.23352878081477e-11
23	LIN1	288	2016	11.119531048756	0.611916110880978	3.26337835978572	10	552.545291992019	17	0	5.53	4.65	5	6.76	3.35	0.750374474781712	0.608661988449141	0.0329159635261626	2.23352878081477e-11
23	LIN1	289	2016	12.0016553662239	0	2.83317295674006	10	552.545291992019	17	0	5.53	4.65	5	6.76	3.35	0.750374474781712	0.608661988449141	0.0329159635261626	2.23352878081477e-11
23	LIN1	290	2016	12.08544699476	0	2.42290345254964	10	552.545291992019	17	0	5.53	4.65	5	6.76	3.35	0.750374474781712	0.608661988449141	0.0329159635261626	2.23352878081477e-11
24	LIN1	291	2016	10.5137086536904	7.94663630239521	3.40462763924419	10	552.545291992019	17	0	5.53	4.65	5	6.76	3.35	0.750374474781712	0.608661988449141	0.0329159635261626	2.23352878081477e-11
24	LIN1	292	2016	7.33066930440945	11.4895470810419	4.57706588001948	10	552.545291992019	17	0	5.53	4.65	5	6.76	3.35	0.750374474781712	0.608661988449141	0.0329159635261626	2.23352878081477e-11
24	LIN1	293	2016	6.69232311641505	0.280896159642801	2.0929873751779	10	552.545291992019	17	0	5.53	4.65	5	6.76	3.35	0.750374474781712	0.608661988449141	0.0329159635261626	2.23352878081477e-11
24	LIN1	294	2016	6.34214945408606	7.08749825318943	2.51981241870386	10	552.545291992019	17	0	5.53	4.65	5	6.76	3.35	0.750374474781712	0.608661988449141	0.0329159635261626	2.23352878081477e-11
24	LIN1	295	2016	7.13747311431367	1.05010396629675	1.97767005280627	10	552.545291992019	17	0	5.53	4.65	5	6.76	3.35	0.750374474781712	0.608661988449141	0.0329159635261626	2.23352878081477e-11
24	LIN1	296	2016	5.960196363676	0	2.02434553449762	10	552.545291992019	17	0	5.53	4.65	5	6.76	3.35	0.750374474781712	0.608661988449141	0.0329159635261626	2.23352878081477e-11
24	LIN1	297	2016	9.3767655092166	11.1229794598568	2.0399241799934	10	552.545291992019	17	0	5.53	4.65	5	6.76	3.35	0.750374474781712	0.608661988449141	0.0329159635261626	2.23352878081477e-11
24	LIN1	298	2016	9.29293484241853	0.0472097025980203	1.88809931865034	10	552.545291992019	17	0	5.53	4.65	5	6.76	3.35	0.750374474781712	0.608661988449141	0.0329159635261626	2.23352878081477e-11
24	LIN1	299	2016	8.50134573681808	0	1.3764950987396	10	552.545291992019	17	0	5.53	4.65	5	6.76	3.35	0.750374474781712	0.608661988449141	0.0329159635261626	2.23352878081477e-11
24	LIN1	300	2016	9.49157957180552	0	2.65046766209279	10	552.545291992019	17	0	5.53	4.65	5	6.76	3.35	0.750374474781712	0.608661988449141	0.0329159635261626	2.23352878081477e-11
24	LIN1	301	2016	10.9402506116675	1.08981124159791	3.55003818365358	10	552.545291992019	17	0	5.53	4.65	5	6.76	3.35	0.750374474781712	0.608661988449141	0.0329159635261626	2.23352878081477e-11
24	LIN1	302	2016	9.80446267435846	0	2.37926315016784	10	552.545291992019	17	0	5.53	4.65	5	6.76	3.35	0.750374474781712	0.608661988449141	0.0329159635261626	2.23352878081477e-11
24	LIN1	303	2016	8.81443968872605	0	1.60996177030563	10	552.545291992019	17	0	5.53	4.65	5	6.76	3.35	0.750374474781712	0.608661988449141	0.0329159635261626	2.23352878081477e-11
24	LIN1	304	2016	8.97938316315386	0	1.84756067036062	10	552.545291992019	17	0	5.53	4.65	5	6.76	3.35	0.750374474781712	0.608661988449141	0.0329159635261626	2.23352878081477e-11
24	LIN1	305	2016	9.07934791223966	0.696326562924965	2.25162596655592	10	552.545291992019	17	0	5.53	4.65	5	6.76	3.35	0.750374474781712	0.608661988449141	0.0329159635261626	2.23352878081477e-11
24	LIN1	306	2016	6.86977499753611	2.90998975516691	3.79133391255581	10	552.545291992019	17	0	5.53	4.65	5	6.76	3.35	0.750374474781712	0.608661988449141	0.0329159635261626	2.23352878081477e-11
24	LIN1	307	2016	6.02311213226056	0	2.46715062898399	10	552.545291992019	17	0	5.53	4.65	5	6.76	3.35	0.750374474781712	0.608661988449141	0.0329159635261626	2.23352878081477e-11
24	LIN1	308	2016	5.43855997496489	2.22444397690131	2.96331652288144	10	552.545291992019	17	0	5.53	4.65	5	6.76	3.35	0.750374474781712	0.608661988449141	0.0329159635261626	2.23352878081477e-11
25	LIN2	103	2016	8.74282003578449	0	1.71718217197536	10	563.32272784156	14	1	5.47	4.07	4.47	6.6	3	0.300376085561226	0.843122598827885	0.0206004224036637	0.0390259544789254
25	LIN2	104	2016	10.2773400300956	4.63036234424743	2.11992194849781	10	563.32272784156	14	1	5.47	4.07	4.47	6.6	3	0.300376085561226	0.843122598827885	0.0206004224036637	0.0390259544789254
25	LIN2	105	2016	11.4095926427681	0.0520596691955788	4.56709542374335	10	563.32272784156	14	1	5.47	4.07	4.47	6.6	3	0.300376085561226	0.843122598827885	0.0206004224036637	0.0390259544789254
25	LIN2	106	2016	9.46065095506398	2.37115269670504	4.43217387542373	10	563.32272784156	14	1	5.47	4.07	4.47	6.6	3	0.300376085561226	0.843122598827885	0.0206004224036637	0.0390259544789254
25	LIN2	107	2016	5.92959214674823	0.0356991792393622	2.90952028776199	10	563.32272784156	14	1	5.47	4.07	4.47	6.6	3	0.300376085561226	0.843122598827885	0.0206004224036637	0.0390259544789254
25	LIN2	108	2016	6.86622666149785	0	3.0500338469982	10	563.32272784156	14	1	5.47	4.07	4.47	6.6	3	0.300376085561226	0.843122598827885	0.0206004224036637	0.0390259544789254
25	LIN2	109	2016	8.70327199650031	0	3.54278340034227	10	563.32272784156	14	1	5.47	4.07	4.47	6.6	3	0.300376085561226	0.843122598827885	0.0206004224036637	0.0390259544789254
25	LIN2	110	2016	8.20000426067656	0	2.56417843776656	10	563.32272784156	14	1	5.47	4.07	4.47	6.6	3	0.300376085561226	0.843122598827885	0.0206004224036637	0.0390259544789254
25	LIN2	111	2016	12.3366376769319	0	2.60984303349257	10	563.32272784156	14	1	5.47	4.07	4.47	6.6	3	0.300376085561226	0.843122598827885	0.0206004224036637	0.0390259544789254
25	LIN2	112	2016	10.6992608989979	0.784934902487472	3.03855363707067	10	563.32272784156	14	1	5.47	4.07	4.47	6.6	3	0.300376085561226	0.843122598827885	0.0206004224036637	0.0390259544789254
25	LIN2	113	2016	5.37806556615734	0.590618681596082	3.72697772219533	10	563.32272784156	14	1	5.47	4.07	4.47	6.6	3	0.300376085561226	0.843122598827885	0.0206004224036637	0.0390259544789254
25	LIN2	114	2016	2.96107650214787	1.63232621902536	3.84843067514681	10	563.32272784156	14	1	5.47	4.07	4.47	6.6	3	0.300376085561226	0.843122598827885	0.0206004224036637	0.0390259544789254
25	LIN2	115	2016	2.94683927377181	17.4503746448807	4.44602192211612	10	563.32272784156	14	1	5.47	4.07	4.47	6.6	3	0.300376085561226	0.843122598827885	0.0206004224036637	0.0390259544789254
25	LIN2	116	2016	2.28411061003731	6.60325656963473	5.49212462480865	10	563.32272784156	14	1	5.47	4.07	4.47	6.6	3	0.300376085561226	0.843122598827885	0.0206004224036637	0.0390259544789254
25	LIN2	117	2016	3.20876345710956	9.1117361220033	5.61911463184925	10	563.32272784156	14	1	5.47	4.07	4.47	6.6	3	0.300376085561226	0.843122598827885	0.0206004224036637	0.0390259544789254
25	LIN2	118	2016	4.24362916144013	1.16125816284943	3.14115784624261	10	563.32272784156	14	1	5.47	4.07	4.47	6.6	3	0.300376085561226	0.843122598827885	0.0206004224036637	0.0390259544789254
25	LIN2	119	2016	6.82914682384898	1.30024331494077	4.37145644802302	10	563.32272784156	14	1	5.47	4.07	4.47	6.6	3	0.300376085561226	0.843122598827885	0.0206004224036637	0.0390259544789254
25	LIN2	120	2016	6.64037982720645	4.86730848412426	2.80983827174406	10	563.32272784156	14	1	5.47	4.07	4.47	6.6	3	0.300376085561226	0.843122598827885	0.0206004224036637	0.0390259544789254
25	LIN2	121	2016	9.02924328641874	0	4.36341094293237	10	563.32272784156	14	1	5.47	4.07	4.47	6.6	3	0.300376085561226	0.843122598827885	0.0206004224036637	0.0390259544789254
25	LIN2	122	2016	12.246099531472	1.87119980025478	1.89261586633746	10	563.32272784156	14	1	5.47	4.07	4.47	6.6	3	0.300376085561226	0.843122598827885	0.0206004224036637	0.0390259544789254
25	LIN2	123	2016	9.70207714992797	1.45615633369156	3.75611687085717	10	563.32272784156	14	1	5.47	4.07	4.47	6.6	3	0.300376085561226	0.843122598827885	0.0206004224036637	0.0390259544789254
25	LIN2	124	2016	8.97892572464665	0	2.07475749486884	10	563.32272784156	14	1	5.47	4.07	4.47	6.6	3	0.300376085561226	0.843122598827885	0.0206004224036637	0.0390259544789254
25	LIN2	125	2016	12.7670391490655	0	3.63123795801413	10	563.32272784156	14	1	5.47	4.07	4.47	6.6	3	0.300376085561226	0.843122598827885	0.0206004224036637	0.0390259544789254
25	LIN2	126	2016	16.9206385259487	0	3.76200799202982	10	563.32272784156	14	1	5.47	4.07	4.47	6.6	3	0.300376085561226	0.843122598827885	0.0206004224036637	0.0390259544789254
25	LIN2	127	2016	19.2125967097315	0	3.4447385051166	10	563.32272784156	14	1	5.47	4.07	4.47	6.6	3	0.300376085561226	0.843122598827885	0.0206004224036637	0.0390259544789254
25	LIN2	128	2016	19.6014810753005	0	4.78449283101866	10	563.32272784156	14	1	5.47	4.07	4.47	6.6	3	0.300376085561226	0.843122598827885	0.0206004224036637	0.0390259544789254
26	LIN2	129	2016	19.5781327312365	0	4.50103310026672	10	563.32272784156	14	1	5.47	4.07	4.47	6.6	3	0.300376085561226	0.843122598827885	0.0206004224036637	0.0390259544789254
26	LIN2	130	2016	18.4101711150507	0	3.0885306460086	10	563.32272784156	14	1	5.47	4.07	4.47	6.6	3	0.300376085561226	0.843122598827885	0.0206004224036637	0.0390259544789254
26	LIN2	131	2016	18.5306708188801	0	3.51313174237362	10	563.32272784156	14	1	5.47	4.07	4.47	6.6	3	0.300376085561226	0.843122598827885	0.0206004224036637	0.0390259544789254
26	LIN2	132	2016	18.5988685132845	0	3.80979896726958	10	563.32272784156	14	1	5.47	4.07	4.47	6.6	3	0.300376085561226	0.843122598827885	0.0206004224036637	0.0390259544789254
26	LIN2	133	2016	17.0779270732496	0	3.48947576658894	10	563.32272784156	14	1	5.47	4.07	4.47	6.6	3	0.300376085561226	0.843122598827885	0.0206004224036637	0.0390259544789254
26	LIN2	134	2016	8.1784810385843	0.805442749753932	5.01201849338173	10	563.32272784156	14	1	5.47	4.07	4.47	6.6	3	0.300376085561226	0.843122598827885	0.0206004224036637	0.0390259544789254
26	LIN2	135	2016	7.18546139302925	0.885025509152005	4.38936500404018	10	563.32272784156	14	1	5.47	4.07	4.47	6.6	3	0.300376085561226	0.843122598827885	0.0206004224036637	0.0390259544789254
26	LIN2	136	2016	8.02386996844025	0.156173338380521	3.11411585053552	10	563.32272784156	14	1	5.47	4.07	4.47	6.6	3	0.300376085561226	0.843122598827885	0.0206004224036637	0.0390259544789254
26	LIN2	137	2016	11.3723119830037	0	3.09347651094542	10	563.32272784156	14	1	5.47	4.07	4.47	6.6	3	0.300376085561226	0.843122598827885	0.0206004224036637	0.0390259544789254
26	LIN2	138	2016	13.5597356055178	2.65347754502201	3.06424602475938	10	563.32272784156	14	1	5.47	4.07	4.47	6.6	3	0.300376085561226	0.843122598827885	0.0206004224036637	0.0390259544789254
26	LIN2	139	2016	12.2805415757128	0	2.35263581569707	10	563.32272784156	14	1	5.47	4.07	4.47	6.6	3	0.300376085561226	0.843122598827885	0.0206004224036637	0.0390259544789254
26	LIN2	140	2016	12.9574602978872	0	3.62812220203994	10	563.32272784156	14	1	5.47	4.07	4.47	6.6	3	0.300376085561226	0.843122598827885	0.0206004224036637	0.0390259544789254
26	LIN2	141	2016	16.7991235035428	0	3.540149698677	10	563.32272784156	14	1	5.47	4.07	4.47	6.6	3	0.300376085561226	0.843122598827885	0.0206004224036637	0.0390259544789254
26	LIN2	142	2016	17.4601805570531	4.97613928747064	3.75045797014497	10	563.32272784156	14	1	5.47	4.07	4.47	6.6	3	0.300376085561226	0.843122598827885	0.0206004224036637	0.0390259544789254
26	LIN2	143	2016	11.3217142211041	5.68066461846325	4.23655416128247	10	563.32272784156	14	1	5.47	4.07	4.47	6.6	3	0.300376085561226	0.843122598827885	0.0206004224036637	0.0390259544789254
26	LIN2	144	2016	9.78337065848078	0.00154470382390048	3.69148558053506	10	563.32272784156	14	1	5.47	4.07	4.47	6.6	3	0.300376085561226	0.843122598827885	0.0206004224036637	0.0390259544789254
26	LIN2	145	2016	11.6284821802492	0	1.61130375112003	10	563.32272784156	14	1	5.47	4.07	4.47	6.6	3	0.300376085561226	0.843122598827885	0.0206004224036637	0.0390259544789254
26	LIN2	146	2016	15.987149797027	0.0215460099019775	1.80189034229535	10	563.32272784156	14	1	5.47	4.07	4.47	6.6	3	0.300376085561226	0.843122598827885	0.0206004224036637	0.0390259544789254
26	LIN2	147	2016	17.0958224231065	2.09532979812728	2.23292085081929	10	563.32272784156	14	1	5.47	4.07	4.47	6.6	3	0.300376085561226	0.843122598827885	0.0206004224036637	0.0390259544789254
26	LIN2	148	2016	17.9126822990508	0.448087243148798	1.8656028714786	10	563.32272784156	14	1	5.47	4.07	4.47	6.6	3	0.300376085561226	0.843122598827885	0.0206004224036637	0.0390259544789254
26	LIN2	149	2016	18.0729634191181	12.8818331741951	2.72819792686313	10	563.32272784156	14	1	5.47	4.07	4.47	6.6	3	0.300376085561226	0.843122598827885	0.0206004224036637	0.0390259544789254
26	LIN2	150	2016	16.720924198228	10.7304057355007	3.61149196192446	10	563.32272784156	14	1	5.47	4.07	4.47	6.6	3	0.300376085561226	0.843122598827885	0.0206004224036637	0.0390259544789254
26	LIN2	151	2016	16.0440135374969	2.53375344847679	2.98076682641963	10	563.32272784156	14	1	5.47	4.07	4.47	6.6	3	0.300376085561226	0.843122598827885	0.0206004224036637	0.0390259544789254
26	LIN2	152	2016	15.4859071990932	31.0687002256294	2.5776474056847	10	563.32272784156	14	1	5.47	4.07	4.47	6.6	3	0.300376085561226	0.843122598827885	0.0206004224036637	0.0390259544789254
26	LIN2	153	2016	17.4320136159069	6.72972635177633	2.40567174255326	10	563.32272784156	14	1	5.47	4.07	4.47	6.6	3	0.300376085561226	0.843122598827885	0.0206004224036637	0.0390259544789254
26	LIN2	154	2016	16.7731421928464	11.9011309381032	2.12451735683724	10	563.32272784156	14	1	5.47	4.07	4.47	6.6	3	0.300376085561226	0.843122598827885	0.0206004224036637	0.0390259544789254
26	LIN2	155	2016	17.8900895162179	4.42105086199969	2.37115790164726	10	563.32272784156	14	1	5.47	4.07	4.47	6.6	3	0.300376085561226	0.843122598827885	0.0206004224036637	0.0390259544789254
26	LIN2	156	2016	19.3217010154792	2.14341785539035	2.18824409693123	10	563.32272784156	14	1	5.47	4.07	4.47	6.6	3	0.300376085561226	0.843122598827885	0.0206004224036637	0.0390259544789254
26	LIN2	157	2016	20.1076340399944	0.205782021793811	2.16306745999217	10	563.32272784156	14	1	5.47	4.07	4.47	6.6	3	0.300376085561226	0.843122598827885	0.0206004224036637	0.0390259544789254
27	LIN2	158	2016	18.9126721613607	9.14337765856179	1.99298896688787	10	563.32272784156	14	1	5.47	4.07	4.47	6.6	3	0.300376085561226	0.843122598827885	0.0206004224036637	0.0390259544789254
27	LIN2	159	2016	17.8809075361684	0	2.90058943259933	10	563.32272784156	14	1	5.47	4.07	4.47	6.6	3	0.300376085561226	0.843122598827885	0.0206004224036637	0.0390259544789254
27	LIN2	160	2016	14.7729519902886	0	2.81140259194102	10	563.32272784156	14	1	5.47	4.07	4.47	6.6	3	0.300376085561226	0.843122598827885	0.0206004224036637	0.0390259544789254
27	LIN2	161	2016	15.750830531073	0	2.13745470491376	10	563.32272784156	14	1	5.47	4.07	4.47	6.6	3	0.300376085561226	0.843122598827885	0.0206004224036637	0.0390259544789254
27	LIN2	162	2016	16.7106238821222	3.31365446960226	1.83100641163142	10	563.32272784156	14	1	5.47	4.07	4.47	6.6	3	0.300376085561226	0.843122598827885	0.0206004224036637	0.0390259544789254
27	LIN2	163	2016	15.7862096851469	9.11403526301689	1.90239659389933	10	563.32272784156	14	1	5.47	4.07	4.47	6.6	3	0.300376085561226	0.843122598827885	0.0206004224036637	0.0390259544789254
27	LIN2	164	2016	14.9776283491678	10.6679209655104	2.79247107230538	10	563.32272784156	14	1	5.47	4.07	4.47	6.6	3	0.300376085561226	0.843122598827885	0.0206004224036637	0.0390259544789254
27	LIN2	165	2016	14.52624202495	8.12010100816092	2.98355281688869	10	563.32272784156	14	1	5.47	4.07	4.47	6.6	3	0.300376085561226	0.843122598827885	0.0206004224036637	0.0390259544789254
27	LIN2	166	2016	13.1473583717151	7.70842026939983	2.66439197724422	10	563.32272784156	14	1	5.47	4.07	4.47	6.6	3	0.300376085561226	0.843122598827885	0.0206004224036637	0.0390259544789254
27	LIN2	167	2016	13.4604001491634	1.13965591940708	2.03054626689986	10	563.32272784156	14	1	5.47	4.07	4.47	6.6	3	0.300376085561226	0.843122598827885	0.0206004224036637	0.0390259544789254
27	LIN2	168	2016	13.6751019746071	5.09772592095296	3.03742956667226	10	563.32272784156	14	1	5.47	4.07	4.47	6.6	3	0.300376085561226	0.843122598827885	0.0206004224036637	0.0390259544789254
27	LIN2	169	2016	13.3576395455868	10.6016682023735	3.31708718280972	10	563.32272784156	14	1	5.47	4.07	4.47	6.6	3	0.300376085561226	0.843122598827885	0.0206004224036637	0.0390259544789254
27	LIN2	170	2016	12.9055362791213	0	2.65820114079083	10	563.32272784156	14	1	5.47	4.07	4.47	6.6	3	0.300376085561226	0.843122598827885	0.0206004224036637	0.0390259544789254
27	LIN2	171	2016	14.6069762662468	12.7578831321802	3.89149207605425	10	563.32272784156	14	1	5.47	4.07	4.47	6.6	3	0.300376085561226	0.843122598827885	0.0206004224036637	0.0390259544789254
27	LIN2	172	2016	17.2685021212903	0.116323933765525	2.96085257675451	10	563.32272784156	14	1	5.47	4.07	4.47	6.6	3	0.300376085561226	0.843122598827885	0.0206004224036637	0.0390259544789254
27	LIN2	173	2016	19.8916300351463	0	2.22118447505352	10	563.32272784156	14	1	5.47	4.07	4.47	6.6	3	0.300376085561226	0.843122598827885	0.0206004224036637	0.0390259544789254
27	LIN2	174	2016	25.2045504004622	0	3.41180137488189	10	563.32272784156	14	1	5.47	4.07	4.47	6.6	3	0.300376085561226	0.843122598827885	0.0206004224036637	0.0390259544789254
27	LIN2	175	2016	21.555446449132	6.89619335955561	2.63452446687404	10	563.32272784156	14	1	5.47	4.07	4.47	6.6	3	0.300376085561226	0.843122598827885	0.0206004224036637	0.0390259544789254
27	LIN2	176	2016	15.6403916863867	22.3863224339697	2.91214802073699	10	563.32272784156	14	1	5.47	4.07	4.47	6.6	3	0.300376085561226	0.843122598827885	0.0206004224036637	0.0390259544789254
27	LIN2	177	2016	13.8590019639354	2.89712244375968	3.17590016644992	10	563.32272784156	14	1	5.47	4.07	4.47	6.6	3	0.300376085561226	0.843122598827885	0.0206004224036637	0.0390259544789254
27	LIN2	178	2016	13.8697939864937	7.50886754604666	3.4528740039662	10	563.32272784156	14	1	5.47	4.07	4.47	6.6	3	0.300376085561226	0.843122598827885	0.0206004224036637	0.0390259544789254
27	LIN2	179	2016	16.9277772616798	4.65554993599454	2.36815001574924	10	563.32272784156	14	1	5.47	4.07	4.47	6.6	3	0.300376085561226	0.843122598827885	0.0206004224036637	0.0390259544789254
27	LIN2	180	2016	16.7098894144475	1.8976062792228	4.06526541876572	10	563.32272784156	14	1	5.47	4.07	4.47	6.6	3	0.300376085561226	0.843122598827885	0.0206004224036637	0.0390259544789254
27	LIN2	181	2016	16.3962033614411	5.82055299320396	3.57545403065974	10	563.32272784156	14	1	5.47	4.07	4.47	6.6	3	0.300376085561226	0.843122598827885	0.0206004224036637	0.0390259544789254
28	LIN2	182	2016	17.7359706669323	3.95614948342383	4.24204526593403	10	563.32272784156	14	1	5.47	4.07	4.47	6.6	3	0.300376085561226	0.843122598827885	0.0206004224036637	0.0390259544789254
28	LIN2	183	2016	13.673609528487	1.30438372467403	4.16886342984998	10	563.32272784156	14	1	5.47	4.07	4.47	6.6	3	0.300376085561226	0.843122598827885	0.0206004224036637	0.0390259544789254
28	LIN2	184	2016	13.8839379927379	1.51610530460812	3.23017431807281	10	563.32272784156	14	1	5.47	4.07	4.47	6.6	3	0.300376085561226	0.843122598827885	0.0206004224036637	0.0390259544789254
28	LIN2	185	2016	15.9155263904609	0	2.10337571369861	10	563.32272784156	14	1	5.47	4.07	4.47	6.6	3	0.300376085561226	0.843122598827885	0.0206004224036637	0.0390259544789254
28	LIN2	186	2016	16.3030767670445	1.50318693641067	4.17953193244596	10	563.32272784156	14	1	5.47	4.07	4.47	6.6	3	0.300376085561226	0.843122598827885	0.0206004224036637	0.0390259544789254
28	LIN2	187	2016	14.684091961884	0	3.47557068221976	10	563.32272784156	14	1	5.47	4.07	4.47	6.6	3	0.300376085561226	0.843122598827885	0.0206004224036637	0.0390259544789254
28	LIN2	188	2016	16.4246465612713	0	1.86780414644432	10	563.32272784156	14	1	5.47	4.07	4.47	6.6	3	0.300376085561226	0.843122598827885	0.0206004224036637	0.0390259544789254
28	LIN2	189	2016	19.1238545426358	0	3.54586520216948	10	563.32272784156	14	1	5.47	4.07	4.47	6.6	3	0.300376085561226	0.843122598827885	0.0206004224036637	0.0390259544789254
28	LIN2	190	2016	19.2402832207501	0	3.18765965113124	10	563.32272784156	14	1	5.47	4.07	4.47	6.6	3	0.300376085561226	0.843122598827885	0.0206004224036637	0.0390259544789254
28	LIN2	191	2016	22.7689316899876	0	3.46267903479833	10	563.32272784156	14	1	5.47	4.07	4.47	6.6	3	0.300376085561226	0.843122598827885	0.0206004224036637	0.0390259544789254
28	LIN2	192	2016	19.6927438818679	0	4.17278091102114	10	563.32272784156	14	1	5.47	4.07	4.47	6.6	3	0.300376085561226	0.843122598827885	0.0206004224036637	0.0390259544789254
28	LIN2	193	2016	17.0494454823775	1.52720441888557	3.03152843766342	10	563.32272784156	14	1	5.47	4.07	4.47	6.6	3	0.300376085561226	0.843122598827885	0.0206004224036637	0.0390259544789254
28	LIN2	194	2016	13.5818160008033	4.2390932454181	2.76261401200264	10	563.32272784156	14	1	5.47	4.07	4.47	6.6	3	0.300376085561226	0.843122598827885	0.0206004224036637	0.0390259544789254
28	LIN2	195	2016	13.6616191396381	0	3.63478419923203	10	563.32272784156	14	1	5.47	4.07	4.47	6.6	3	0.300376085561226	0.843122598827885	0.0206004224036637	0.0390259544789254
28	LIN2	196	2016	14.7990191270757	0	3.31915338369817	10	563.32272784156	14	1	5.47	4.07	4.47	6.6	3	0.300376085561226	0.843122598827885	0.0206004224036637	0.0390259544789254
28	LIN2	197	2016	16.5292354239907	0	2.39202387361289	10	563.32272784156	14	1	5.47	4.07	4.47	6.6	3	0.300376085561226	0.843122598827885	0.0206004224036637	0.0390259544789254
28	LIN2	198	2016	19.6095818403995	1.25618169726682	2.93192390191387	10	563.32272784156	14	1	5.47	4.07	4.47	6.6	3	0.300376085561226	0.843122598827885	0.0206004224036637	0.0390259544789254
28	LIN2	199	2016	20.6465831022645	0	2.10262951254479	10	563.32272784156	14	1	5.47	4.07	4.47	6.6	3	0.300376085561226	0.843122598827885	0.0206004224036637	0.0390259544789254
28	LIN2	200	2016	23.3052681950155	0	1.82583329481424	10	563.32272784156	14	1	5.47	4.07	4.47	6.6	3	0.300376085561226	0.843122598827885	0.0206004224036637	0.0390259544789254
28	LIN2	201	2016	24.4995303902039	7.34762942042265	3.24793169644867	10	563.32272784156	14	1	5.47	4.07	4.47	6.6	3	0.300376085561226	0.843122598827885	0.0206004224036637	0.0390259544789254
28	LIN2	202	2016	21.9557837010479	2.00490829329678	2.61520246004403	10	563.32272784156	14	1	5.47	4.07	4.47	6.6	3	0.300376085561226	0.843122598827885	0.0206004224036637	0.0390259544789254
28	LIN2	203	2016	21.845426674487	0	2.37533199528739	10	563.32272784156	14	1	5.47	4.07	4.47	6.6	3	0.300376085561226	0.843122598827885	0.0206004224036637	0.0390259544789254
28	LIN2	204	2016	20.2250571823886	5.23531198905589	1.96027043176481	10	563.32272784156	14	1	5.47	4.07	4.47	6.6	3	0.300376085561226	0.843122598827885	0.0206004224036637	0.0390259544789254
28	LIN2	205	2016	21.9877509867482	0	1.81793154364865	10	563.32272784156	14	1	5.47	4.07	4.47	6.6	3	0.300376085561226	0.843122598827885	0.0206004224036637	0.0390259544789254
28	LIN2	206	2016	21.3157857287307	0	2.4527719204194	10	563.32272784156	14	1	5.47	4.07	4.47	6.6	3	0.300376085561226	0.843122598827885	0.0206004224036637	0.0390259544789254
29	LIN2	207	2016	18.711697097788	0.902919029310024	1.8154909195948	10	563.32272784156	14	1	5.47	4.07	4.47	6.6	3	0.300376085561226	0.843122598827885	0.0206004224036637	0.0390259544789254
29	LIN2	208	2016	18.0914653297675	0.891286961024353	2.93576822907843	10	563.32272784156	14	1	5.47	4.07	4.47	6.6	3	0.300376085561226	0.843122598827885	0.0206004224036637	0.0390259544789254
29	LIN2	209	2016	17.4524135404388	14.0998625024617	2.57044133949807	10	563.32272784156	14	1	5.47	4.07	4.47	6.6	3	0.300376085561226	0.843122598827885	0.0206004224036637	0.0390259544789254
29	LIN2	210	2016	17.326592134131	6.01365249028986	3.21518039227	10	563.32272784156	14	1	5.47	4.07	4.47	6.6	3	0.300376085561226	0.843122598827885	0.0206004224036637	0.0390259544789254
29	LIN2	211	2016	18.2714968535695	0	2.64640884262687	10	563.32272784156	14	1	5.47	4.07	4.47	6.6	3	0.300376085561226	0.843122598827885	0.0206004224036637	0.0390259544789254
29	LIN2	212	2016	15.4565580576788	4.64778068595121	2.56744626473208	10	563.32272784156	14	1	5.47	4.07	4.47	6.6	3	0.300376085561226	0.843122598827885	0.0206004224036637	0.0390259544789254
29	LIN2	213	2016	15.6315966578973	2.9673652431482	2.47173871729593	10	563.32272784156	14	1	5.47	4.07	4.47	6.6	3	0.300376085561226	0.843122598827885	0.0206004224036637	0.0390259544789254
29	LIN2	214	2016	15.0921983225482	27.7819024558095	3.16757336868291	10	563.32272784156	14	1	5.47	4.07	4.47	6.6	3	0.300376085561226	0.843122598827885	0.0206004224036637	0.0390259544789254
29	LIN2	215	2016	17.5661197118857	11.7302064963504	4.28777239142861	10	563.32272784156	14	1	5.47	4.07	4.47	6.6	3	0.300376085561226	0.843122598827885	0.0206004224036637	0.0390259544789254
29	LIN2	216	2016	16.4451692729811	0	3.48495560484841	10	563.32272784156	14	1	5.47	4.07	4.47	6.6	3	0.300376085561226	0.843122598827885	0.0206004224036637	0.0390259544789254
29	LIN2	217	2016	15.1633321189126	1.56902231344643	2.88475428473995	10	563.32272784156	14	1	5.47	4.07	4.47	6.6	3	0.300376085561226	0.843122598827885	0.0206004224036637	0.0390259544789254
29	LIN2	218	2016	16.6294678730579	0	2.85211797012233	10	563.32272784156	14	1	5.47	4.07	4.47	6.6	3	0.300376085561226	0.843122598827885	0.0206004224036637	0.0390259544789254
29	LIN2	219	2016	18.8663545653588	0	3.16525401810341	10	563.32272784156	14	1	5.47	4.07	4.47	6.6	3	0.300376085561226	0.843122598827885	0.0206004224036637	0.0390259544789254
29	LIN2	220	2016	17.3115126231406	1.36453356707159	4.02441097587145	10	563.32272784156	14	1	5.47	4.07	4.47	6.6	3	0.300376085561226	0.843122598827885	0.0206004224036637	0.0390259544789254
29	LIN2	221	2016	13.8363187638708	0.122609699276	2.84555388561079	10	563.32272784156	14	1	5.47	4.07	4.47	6.6	3	0.300376085561226	0.843122598827885	0.0206004224036637	0.0390259544789254
30	LIN2	222	2016	11.7798577172319	0.751251001668996	2.61772853698073	10	563.32272784156	14	1	5.47	4.07	4.47	6.6	3	0.300376085561226	0.843122598827885	0.0206004224036637	0.0390259544789254
30	LIN2	223	2016	11.098337028273	14.9679063920342	3.540822982156	10	563.32272784156	14	1	5.47	4.07	4.47	6.6	3	0.300376085561226	0.843122598827885	0.0206004224036637	0.0390259544789254
30	LIN2	224	2016	16.5506088555591	1.70876425916645	3.44799648877913	10	563.32272784156	14	1	5.47	4.07	4.47	6.6	3	0.300376085561226	0.843122598827885	0.0206004224036637	0.0390259544789254
30	LIN2	225	2016	18.6258170643337	0	3.49890408224051	10	563.32272784156	14	1	5.47	4.07	4.47	6.6	3	0.300376085561226	0.843122598827885	0.0206004224036637	0.0390259544789254
30	LIN2	226	2016	17.7023467680534	0	2.10590720895783	10	563.32272784156	14	1	5.47	4.07	4.47	6.6	3	0.300376085561226	0.843122598827885	0.0206004224036637	0.0390259544789254
30	LIN2	227	2016	17.2234828688339	0	2.42358766646736	10	563.32272784156	14	1	5.47	4.07	4.47	6.6	3	0.300376085561226	0.843122598827885	0.0206004224036637	0.0390259544789254
30	LIN2	228	2016	17.6299393396046	0	2.44025969358264	10	563.32272784156	14	1	5.47	4.07	4.47	6.6	3	0.300376085561226	0.843122598827885	0.0206004224036637	0.0390259544789254
30	LIN2	229	2016	18.4464171072626	0	2.53232178655343	10	563.32272784156	14	1	5.47	4.07	4.47	6.6	3	0.300376085561226	0.843122598827885	0.0206004224036637	0.0390259544789254
30	LIN2	230	2016	18.9484417216141	0	2.05802261581213	10	563.32272784156	14	1	5.47	4.07	4.47	6.6	3	0.300376085561226	0.843122598827885	0.0206004224036637	0.0390259544789254
30	LIN2	231	2016	19.2601288166629	0.263759060345101	2.23675493333554	10	563.32272784156	14	1	5.47	4.07	4.47	6.6	3	0.300376085561226	0.843122598827885	0.0206004224036637	0.0390259544789254
30	LIN2	232	2016	18.1205782114912	0.223533841937734	3.53017166661495	10	563.32272784156	14	1	5.47	4.07	4.47	6.6	3	0.300376085561226	0.843122598827885	0.0206004224036637	0.0390259544789254
30	LIN2	233	2016	15.3849015728778	8.11436717977967	4.28475022568705	10	563.32272784156	14	1	5.47	4.07	4.47	6.6	3	0.300376085561226	0.843122598827885	0.0206004224036637	0.0390259544789254
30	LIN2	234	2016	15.9000370224113	0.664892723972544	3.16518109354739	10	563.32272784156	14	1	5.47	4.07	4.47	6.6	3	0.300376085561226	0.843122598827885	0.0206004224036637	0.0390259544789254
30	LIN2	235	2016	20.0749294557574	0	1.99309102470356	10	563.32272784156	14	1	5.47	4.07	4.47	6.6	3	0.300376085561226	0.843122598827885	0.0206004224036637	0.0390259544789254
30	LIN2	236	2016	23.5083105977584	0	3.04047874496036	10	563.32272784156	14	1	5.47	4.07	4.47	6.6	3	0.300376085561226	0.843122598827885	0.0206004224036637	0.0390259544789254
30	LIN2	237	2016	25.1161569336856	0	3.32085055130309	10	563.32272784156	14	1	5.47	4.07	4.47	6.6	3	0.300376085561226	0.843122598827885	0.0206004224036637	0.0390259544789254
30	LIN2	238	2016	25.5558845901826	0	2.43586668616924	10	563.32272784156	14	1	5.47	4.07	4.47	6.6	3	0.300376085561226	0.843122598827885	0.0206004224036637	0.0390259544789254
30	LIN2	239	2016	25.31305891958	1.10317737815668	2.55849522945768	10	563.32272784156	14	1	5.47	4.07	4.47	6.6	3	0.300376085561226	0.843122598827885	0.0206004224036637	0.0390259544789254
30	LIN2	240	2016	23.1705366962701	4.61675517627671	3.59171944409462	10	563.32272784156	14	1	5.47	4.07	4.47	6.6	3	0.300376085561226	0.843122598827885	0.0206004224036637	0.0390259544789254
30	LIN2	241	2016	17.0426522915304	0.29659026146608	2.74913129004706	10	563.32272784156	14	1	5.47	4.07	4.47	6.6	3	0.300376085561226	0.843122598827885	0.0206004224036637	0.0390259544789254
30	LIN2	242	2016	16.9801769838887	0	1.82032370177088	10	563.32272784156	14	1	5.47	4.07	4.47	6.6	3	0.300376085561226	0.843122598827885	0.0206004224036637	0.0390259544789254
30	LIN2	243	2016	18.4463994832297	0	2.20427068341668	10	563.32272784156	14	1	5.47	4.07	4.47	6.6	3	0.300376085561226	0.843122598827885	0.0206004224036637	0.0390259544789254
31	LIN2	244	2016	17.9498946744343	0	2.26645480263909	10	563.32272784156	14	1	5.47	4.07	4.47	6.6	3	0.300376085561226	0.843122598827885	0.0206004224036637	0.0390259544789254
31	LIN2	245	2016	18.4688332064701	0	2.36902464273575	10	563.32272784156	14	1	5.47	4.07	4.47	6.6	3	0.300376085561226	0.843122598827885	0.0206004224036637	0.0390259544789254
31	LIN2	246	2016	18.3452662114316	1.32928697703947	2.56340805077225	10	563.32272784156	14	1	5.47	4.07	4.47	6.6	3	0.300376085561226	0.843122598827885	0.0206004224036637	0.0390259544789254
31	LIN2	247	2016	17.0102218037647	11.6157652836496	4.66654874442605	10	563.32272784156	14	1	5.47	4.07	4.47	6.6	3	0.300376085561226	0.843122598827885	0.0206004224036637	0.0390259544789254
31	LIN2	248	2016	16.340656210218	0	3.21535048995756	10	563.32272784156	14	1	5.47	4.07	4.47	6.6	3	0.300376085561226	0.843122598827885	0.0206004224036637	0.0390259544789254
31	LIN2	249	2016	17.6567397372561	0	1.77440027273288	10	563.32272784156	14	1	5.47	4.07	4.47	6.6	3	0.300376085561226	0.843122598827885	0.0206004224036637	0.0390259544789254
31	LIN2	250	2016	19.522704232201	0	2.3756023174878	10	563.32272784156	14	1	5.47	4.07	4.47	6.6	3	0.300376085561226	0.843122598827885	0.0206004224036637	0.0390259544789254
31	LIN2	251	2016	21.3707666120642	0	3.05686678469325	10	563.32272784156	14	1	5.47	4.07	4.47	6.6	3	0.300376085561226	0.843122598827885	0.0206004224036637	0.0390259544789254
31	LIN2	252	2016	17.7595344013224	0	2.02734103293894	10	563.32272784156	14	1	5.47	4.07	4.47	6.6	3	0.300376085561226	0.843122598827885	0.0206004224036637	0.0390259544789254
31	LIN2	253	2016	19.4702916176815	0	1.76320750529434	10	563.32272784156	14	1	5.47	4.07	4.47	6.6	3	0.300376085561226	0.843122598827885	0.0206004224036637	0.0390259544789254
31	LIN2	254	2016	18.8463306569891	0	1.62658019671552	10	563.32272784156	14	1	5.47	4.07	4.47	6.6	3	0.300376085561226	0.843122598827885	0.0206004224036637	0.0390259544789254
31	LIN2	255	2016	22.1098058618969	0	1.93500323233717	10	563.32272784156	14	1	5.47	4.07	4.47	6.6	3	0.300376085561226	0.843122598827885	0.0206004224036637	0.0390259544789254
31	LIN2	256	2016	23.9538683178209	0	2.39400994136325	10	563.32272784156	14	1	5.47	4.07	4.47	6.6	3	0.300376085561226	0.843122598827885	0.0206004224036637	0.0390259544789254
31	LIN2	257	2016	24.3501298115626	0	2.64799239487288	10	563.32272784156	14	1	5.47	4.07	4.47	6.6	3	0.300376085561226	0.843122598827885	0.0206004224036637	0.0390259544789254
32	LIN2	258	2016	23.0359126937464	0	3.46398251146573	10	563.32272784156	14	1	5.47	4.07	4.47	6.6	3	0.300376085561226	0.843122598827885	0.0206004224036637	0.0390259544789254
32	LIN2	259	2016	17.4305297131447	0	2.77998761222213	10	563.32272784156	14	1	5.47	4.07	4.47	6.6	3	0.300376085561226	0.843122598827885	0.0206004224036637	0.0390259544789254
32	LIN2	260	2016	16.161608956537	2.90462947816785	2.38922637330828	10	563.32272784156	14	1	5.47	4.07	4.47	6.6	3	0.300376085561226	0.843122598827885	0.0206004224036637	0.0390259544789254
32	LIN2	261	2016	16.186599207116	0	3.31542475753836	10	563.32272784156	14	1	5.47	4.07	4.47	6.6	3	0.300376085561226	0.843122598827885	0.0206004224036637	0.0390259544789254
32	LIN2	262	2016	14.5133209783916	0	2.02201668611577	10	563.32272784156	14	1	5.47	4.07	4.47	6.6	3	0.300376085561226	0.843122598827885	0.0206004224036637	0.0390259544789254
32	LIN2	263	2016	14.2333219695782	0	1.41158064167788	10	563.32272784156	14	1	5.47	4.07	4.47	6.6	3	0.300376085561226	0.843122598827885	0.0206004224036637	0.0390259544789254
32	LIN2	264	2016	14.4268012403245	0	1.94661044297424	10	563.32272784156	14	1	5.47	4.07	4.47	6.6	3	0.300376085561226	0.843122598827885	0.0206004224036637	0.0390259544789254
32	LIN2	265	2016	13.5860781604083	0	1.77033837511058	10	563.32272784156	14	1	5.47	4.07	4.47	6.6	3	0.300376085561226	0.843122598827885	0.0206004224036637	0.0390259544789254
32	LIN2	266	2016	14.5752144896251	0	1.91088676051903	10	563.32272784156	14	1	5.47	4.07	4.47	6.6	3	0.300376085561226	0.843122598827885	0.0206004224036637	0.0390259544789254
32	LIN2	267	2016	16.0420160714702	0	2.40326352024296	10	563.32272784156	14	1	5.47	4.07	4.47	6.6	3	0.300376085561226	0.843122598827885	0.0206004224036637	0.0390259544789254
32	LIN2	268	2016	17.8011994783932	0.0948492540599153	3.46802792544599	10	563.32272784156	14	1	5.47	4.07	4.47	6.6	3	0.300376085561226	0.843122598827885	0.0206004224036637	0.0390259544789254
32	LIN2	269	2016	14.670152313274	0	1.85418293844371	10	563.32272784156	14	1	5.47	4.07	4.47	6.6	3	0.300376085561226	0.843122598827885	0.0206004224036637	0.0390259544789254
32	LIN2	270	2016	15.1866731499006	0	1.68260078866837	10	563.32272784156	14	1	5.47	4.07	4.47	6.6	3	0.300376085561226	0.843122598827885	0.0206004224036637	0.0390259544789254
32	LIN2	271	2016	15.7313755068672	0	4.41092809445085	10	563.32272784156	14	1	5.47	4.07	4.47	6.6	3	0.300376085561226	0.843122598827885	0.0206004224036637	0.0390259544789254
32	LIN2	272	2016	17.7116227742665	0.728170611798814	5.54327854898341	10	563.32272784156	14	1	5.47	4.07	4.47	6.6	3	0.300376085561226	0.843122598827885	0.0206004224036637	0.0390259544789254
33	LIN2	273	2016	13.8867846813641	3.5351701951046	3.03732538608239	10	563.32272784156	14	1	5.47	4.07	4.47	6.6	3	0.300376085561226	0.843122598827885	0.0206004224036637	0.0390259544789254
33	LIN2	274	2016	12.5488736528715	1.78517298721279	2.38488845320382	10	563.32272784156	14	1	5.47	4.07	4.47	6.6	3	0.300376085561226	0.843122598827885	0.0206004224036637	0.0390259544789254
33	LIN2	275	2016	11.3590452166483	6.30060525725347	4.45414897931727	10	563.32272784156	14	1	5.47	4.07	4.47	6.6	3	0.300376085561226	0.843122598827885	0.0206004224036637	0.0390259544789254
33	LIN2	276	2016	12.2406981566159	2.42132273220667	2.99066969198397	10	563.32272784156	14	1	5.47	4.07	4.47	6.6	3	0.300376085561226	0.843122598827885	0.0206004224036637	0.0390259544789254
33	LIN2	277	2016	11.0698346486301	0	3.18616944383855	10	563.32272784156	14	1	5.47	4.07	4.47	6.6	3	0.300376085561226	0.843122598827885	0.0206004224036637	0.0390259544789254
33	LIN2	278	2016	8.98729407552563	0	4.1194352162586	10	563.32272784156	14	1	5.47	4.07	4.47	6.6	3	0.300376085561226	0.843122598827885	0.0206004224036637	0.0390259544789254
33	LIN2	279	2016	7.19373583436342	0.00698115378591879	3.4666084611232	10	563.32272784156	14	1	5.47	4.07	4.47	6.6	3	0.300376085561226	0.843122598827885	0.0206004224036637	0.0390259544789254
33	LIN2	280	2016	10.4462555986361	0.0998712970530991	2.92171970598999	10	563.32272784156	14	1	5.47	4.07	4.47	6.6	3	0.300376085561226	0.843122598827885	0.0206004224036637	0.0390259544789254
33	LIN2	281	2016	9.03109356211379	0	2.47653381828789	10	563.32272784156	14	1	5.47	4.07	4.47	6.6	3	0.300376085561226	0.843122598827885	0.0206004224036637	0.0390259544789254
33	LIN2	282	2016	7.53484981968083	0	1.63239961362334	10	563.32272784156	14	1	5.47	4.07	4.47	6.6	3	0.300376085561226	0.843122598827885	0.0206004224036637	0.0390259544789254
33	LIN2	283	2016	7.5196205007939	1.16229760865736	1.38190972043061	10	563.32272784156	14	1	5.47	4.07	4.47	6.6	3	0.300376085561226	0.843122598827885	0.0206004224036637	0.0390259544789254
33	LIN2	284	2016	6.92073452395658	1.48273242259237	1.81670440209818	10	563.32272784156	14	1	5.47	4.07	4.47	6.6	3	0.300376085561226	0.843122598827885	0.0206004224036637	0.0390259544789254
33	LIN2	285	2016	7.66367885768595	0.107207918102161	2.94908268355576	10	563.32272784156	14	1	5.47	4.07	4.47	6.6	3	0.300376085561226	0.843122598827885	0.0206004224036637	0.0390259544789254
33	LIN2	286	2016	7.75402511751105	0	4.71482074835319	10	563.32272784156	14	1	5.47	4.07	4.47	6.6	3	0.300376085561226	0.843122598827885	0.0206004224036637	0.0390259544789254
33	LIN2	287	2016	9.92364804396249	0.47639407829822	3.97389883084357	10	563.32272784156	14	1	5.47	4.07	4.47	6.6	3	0.300376085561226	0.843122598827885	0.0206004224036637	0.0390259544789254
33	LIN2	288	2016	11.1222231869823	0.636113106617265	3.25556305585025	10	563.32272784156	14	1	5.47	4.07	4.47	6.6	3	0.300376085561226	0.843122598827885	0.0206004224036637	0.0390259544789254
33	LIN2	289	2016	12.0143399569532	0	2.82577022967569	10	563.32272784156	14	1	5.47	4.07	4.47	6.6	3	0.300376085561226	0.843122598827885	0.0206004224036637	0.0390259544789254
33	LIN2	290	2016	12.0999848474679	0	2.41642775351999	10	563.32272784156	14	1	5.47	4.07	4.47	6.6	3	0.300376085561226	0.843122598827885	0.0206004224036637	0.0390259544789254
34	LIN2	291	2016	10.5497614029543	8.09523204687255	3.39781220274408	10	563.32272784156	14	1	5.47	4.07	4.47	6.6	3	0.300376085561226	0.843122598827885	0.0206004224036637	0.0390259544789254
34	LIN2	292	2016	7.32261968521106	11.7285344934188	4.57061949181877	10	563.32272784156	14	1	5.47	4.07	4.47	6.6	3	0.300376085561226	0.843122598827885	0.0206004224036637	0.0390259544789254
34	LIN2	293	2016	6.70838462839152	0.236190049506225	2.0846660313298	10	563.32272784156	14	1	5.47	4.07	4.47	6.6	3	0.300376085561226	0.843122598827885	0.0206004224036637	0.0390259544789254
34	LIN2	294	2016	6.33777745358227	7.27421573309861	2.51370478309294	10	563.32272784156	14	1	5.47	4.07	4.47	6.6	3	0.300376085561226	0.843122598827885	0.0206004224036637	0.0390259544789254
34	LIN2	295	2016	7.12605782110725	1.00863696405998	1.97040842208669	10	563.32272784156	14	1	5.47	4.07	4.47	6.6	3	0.300376085561226	0.843122598827885	0.0206004224036637	0.0390259544789254
34	LIN2	296	2016	5.98876445229886	0	2.01621288164824	10	563.32272784156	14	1	5.47	4.07	4.47	6.6	3	0.300376085561226	0.843122598827885	0.0206004224036637	0.0390259544789254
34	LIN2	297	2016	9.39734745980839	11.1434133902238	2.0331523067616	10	563.32272784156	14	1	5.47	4.07	4.47	6.6	3	0.300376085561226	0.843122598827885	0.0206004224036637	0.0390259544789254
34	LIN2	298	2016	9.28668837502171	0.0302840658989785	1.88070020562993	10	563.32272784156	14	1	5.47	4.07	4.47	6.6	3	0.300376085561226	0.843122598827885	0.0206004224036637	0.0390259544789254
34	LIN2	299	2016	8.51253897630602	0	1.36939867484539	10	563.32272784156	14	1	5.47	4.07	4.47	6.6	3	0.300376085561226	0.843122598827885	0.0206004224036637	0.0390259544789254
34	LIN2	300	2016	9.52081758377616	0	2.64569831708989	10	563.32272784156	14	1	5.47	4.07	4.47	6.6	3	0.300376085561226	0.843122598827885	0.0206004224036637	0.0390259544789254
34	LIN2	301	2016	10.9497037081098	1.12009694519472	3.54621413127284	10	563.32272784156	14	1	5.47	4.07	4.47	6.6	3	0.300376085561226	0.843122598827885	0.0206004224036637	0.0390259544789254
34	LIN2	302	2016	9.79666885846093	0	2.37221773204342	10	563.32272784156	14	1	5.47	4.07	4.47	6.6	3	0.300376085561226	0.843122598827885	0.0206004224036637	0.0390259544789254
34	LIN2	303	2016	8.87970431014739	0	1.60254969036463	10	563.32272784156	14	1	5.47	4.07	4.47	6.6	3	0.300376085561226	0.843122598827885	0.0206004224036637	0.0390259544789254
34	LIN2	304	2016	8.99170866117797	0	1.83939381580316	10	563.32272784156	14	1	5.47	4.07	4.47	6.6	3	0.300376085561226	0.843122598827885	0.0206004224036637	0.0390259544789254
34	LIN2	305	2016	9.11621354008703	0.669156641428316	2.24579650937216	10	563.32272784156	14	1	5.47	4.07	4.47	6.6	3	0.300376085561226	0.843122598827885	0.0206004224036637	0.0390259544789254
34	LIN2	306	2016	6.85490234213807	3.00377765599099	3.78559411079311	10	563.32272784156	14	1	5.47	4.07	4.47	6.6	3	0.300376085561226	0.843122598827885	0.0206004224036637	0.0390259544789254
34	LIN2	307	2016	6.01263467333525	0	2.46140730117377	10	563.32272784156	14	1	5.47	4.07	4.47	6.6	3	0.300376085561226	0.843122598827885	0.0206004224036637	0.0390259544789254
34	LIN2	308	2016	5.46071522285134	2.2141948244444	2.95766436668777	10	563.32272784156	14	1	5.47	4.07	4.47	6.6	3	0.300376085561226	0.843122598827885	0.0206004224036637	0.0390259544789254
35	KAN2	121	2016	9.0260400236203	0	4.07029663746273	3	349.433354144652	7	0	1.71	2.14	2.71	7.71	4.29	2.29349866751365e-11	0.540903619643465	2.86681926437184e-11	5.82621463896862e-11
35	KAN2	122	2016	12.2729546581741	2.99588094977064	1.65244339218425	3	349.433354144652	7	0	1.71	2.14	2.71	7.71	4.29	2.29349866751365e-11	0.540903619643465	2.86681926437184e-11	5.82621463896862e-11
35	KAN2	123	2016	11.0180442715635	0	3.54317468586098	3	349.433354144652	7	0	1.71	2.14	2.71	7.71	4.29	2.29349866751365e-11	0.540903619643465	2.86681926437184e-11	5.82621463896862e-11
35	KAN2	124	2016	9.71563966683739	0	1.84769741144665	3	349.433354144652	7	0	1.71	2.14	2.71	7.71	4.29	2.29349866751365e-11	0.540903619643465	2.86681926437184e-11	5.82621463896862e-11
35	KAN2	125	2016	13.8584021311964	0	3.34448840510217	3	349.433354144652	7	0	1.71	2.14	2.71	7.71	4.29	2.29349866751365e-11	0.540903619643465	2.86681926437184e-11	5.82621463896862e-11
35	KAN2	126	2016	17.9484466908744	0	3.49447861758207	3	349.433354144652	7	0	1.71	2.14	2.71	7.71	4.29	2.29349866751365e-11	0.540903619643465	2.86681926437184e-11	5.82621463896862e-11
35	KAN2	127	2016	20.088973584397	0	3.21909347526523	3	349.433354144652	7	0	1.71	2.14	2.71	7.71	4.29	2.29349866751365e-11	0.540903619643465	2.86681926437184e-11	5.82621463896862e-11
35	KAN2	128	2016	20.4713113408131	0	4.53967247679727	3	349.433354144652	7	0	1.71	2.14	2.71	7.71	4.29	2.29349866751365e-11	0.540903619643465	2.86681926437184e-11	5.82621463896862e-11
35	KAN2	129	2016	20.1615865807751	0	4.26097912645921	3	349.433354144652	7	0	1.71	2.14	2.71	7.71	4.29	2.29349866751365e-11	0.540903619643465	2.86681926437184e-11	5.82621463896862e-11
35	KAN2	130	2016	19.0347403870575	0	2.86700655972585	3	349.433354144652	7	0	1.71	2.14	2.71	7.71	4.29	2.29349866751365e-11	0.540903619643465	2.86681926437184e-11	5.82621463896862e-11
35	KAN2	131	2016	20.4838072584531	0	3.26736992559297	3	349.433354144652	7	0	1.71	2.14	2.71	7.71	4.29	2.29349866751365e-11	0.540903619643465	2.86681926437184e-11	5.82621463896862e-11
35	KAN2	132	2016	20.0829966270615	0	3.6472100577529	3	349.433354144652	7	0	1.71	2.14	2.71	7.71	4.29	2.29349866751365e-11	0.540903619643465	2.86681926437184e-11	5.82621463896862e-11
35	KAN2	133	2016	17.455115542913	0	3.33806216851053	3	349.433354144652	7	0	1.71	2.14	2.71	7.71	4.29	2.29349866751365e-11	0.540903619643465	2.86681926437184e-11	5.82621463896862e-11
35	KAN2	134	2016	8.90525366756514	0.628660006549824	4.78732582294153	3	349.433354144652	7	0	1.71	2.14	2.71	7.71	4.29	2.29349866751365e-11	0.540903619643465	2.86681926437184e-11	5.82621463896862e-11
35	KAN2	135	2016	8.43541394977414	0.221742136635883	4.18352916091231	3	349.433354144652	7	0	1.71	2.14	2.71	7.71	4.29	2.29349866751365e-11	0.540903619643465	2.86681926437184e-11	5.82621463896862e-11
35	KAN2	136	2016	9.07035149552112	0.0302376670333102	2.90681748275388	3	349.433354144652	7	0	1.71	2.14	2.71	7.71	4.29	2.29349866751365e-11	0.540903619643465	2.86681926437184e-11	5.82621463896862e-11
35	KAN2	137	2016	12.5683026248927	0	2.88104355321175	3	349.433354144652	7	0	1.71	2.14	2.71	7.71	4.29	2.29349866751365e-11	0.540903619643465	2.86681926437184e-11	5.82621463896862e-11
35	KAN2	138	2016	14.0558578312227	1.71624329127495	2.81055278517802	3	349.433354144652	7	0	1.71	2.14	2.71	7.71	4.29	2.29349866751365e-11	0.540903619643465	2.86681926437184e-11	5.82621463896862e-11
36	KAN2	139	2016	13.4608783360844	0.105506339652017	2.12965224663003	3	349.433354144652	7	0	1.71	2.14	2.71	7.71	4.29	2.29349866751365e-11	0.540903619643465	2.86681926437184e-11	5.82621463896862e-11
36	KAN2	140	2016	13.5901086608285	1.8741042297522	3.40147544165497	3	349.433354144652	7	0	1.71	2.14	2.71	7.71	4.29	2.29349866751365e-11	0.540903619643465	2.86681926437184e-11	5.82621463896862e-11
36	KAN2	141	2016	18.4880401426678	0	3.31810447224902	3	349.433354144652	7	0	1.71	2.14	2.71	7.71	4.29	2.29349866751365e-11	0.540903619643465	2.86681926437184e-11	5.82621463896862e-11
36	KAN2	142	2016	17.79666953239	4.79836787440084	3.50614616745687	3	349.433354144652	7	0	1.71	2.14	2.71	7.71	4.29	2.29349866751365e-11	0.540903619643465	2.86681926437184e-11	5.82621463896862e-11
36	KAN2	143	2016	12.9819065571942	6.54452757501111	3.97184744674611	3	349.433354144652	7	0	1.71	2.14	2.71	7.71	4.29	2.29349866751365e-11	0.540903619643465	2.86681926437184e-11	5.82621463896862e-11
36	KAN2	144	2016	10.9366370514066	0	3.46624622296298	3	349.433354144652	7	0	1.71	2.14	2.71	7.71	4.29	2.29349866751365e-11	0.540903619643465	2.86681926437184e-11	5.82621463896862e-11
36	KAN2	145	2016	13.1797562325272	0	1.4083544133743	3	349.433354144652	7	0	1.71	2.14	2.71	7.71	4.29	2.29349866751365e-11	0.540903619643465	2.86681926437184e-11	5.82621463896862e-11
36	KAN2	146	2016	15.6425364444061	0.828507849956977	1.57378238364052	3	349.433354144652	7	0	1.71	2.14	2.71	7.71	4.29	2.29349866751365e-11	0.540903619643465	2.86681926437184e-11	5.82621463896862e-11
36	KAN2	147	2016	16.5393209741324	1.46569467247799	2.0260430573715	3	349.433354144652	7	0	1.71	2.14	2.71	7.71	4.29	2.29349866751365e-11	0.540903619643465	2.86681926437184e-11	5.82621463896862e-11
36	KAN2	148	2016	18.7860454048764	0.235983146500512	1.65849513043128	3	349.433354144652	7	0	1.71	2.14	2.71	7.71	4.29	2.29349866751365e-11	0.540903619643465	2.86681926437184e-11	5.82621463896862e-11
36	KAN2	149	2016	17.2643612418724	4.40096810229919	2.55784819516365	3	349.433354144652	7	0	1.71	2.14	2.71	7.71	4.29	2.29349866751365e-11	0.540903619643465	2.86681926437184e-11	5.82621463896862e-11
36	KAN2	150	2016	17.3575091752636	20.0682881585107	3.35405392900524	3	349.433354144652	7	0	1.71	2.14	2.71	7.71	4.29	2.29349866751365e-11	0.540903619643465	2.86681926437184e-11	5.82621463896862e-11
36	KAN2	151	2016	18.1097188103017	2.00146013474564	2.69593954677575	3	349.433354144652	7	0	1.71	2.14	2.71	7.71	4.29	2.29349866751365e-11	0.540903619643465	2.86681926437184e-11	5.82621463896862e-11
36	KAN2	152	2016	17.8577175578473	39.6954812018254	2.35886390074477	3	349.433354144652	7	0	1.71	2.14	2.71	7.71	4.29	2.29349866751365e-11	0.540903619643465	2.86681926437184e-11	5.82621463896862e-11
36	KAN2	153	2016	18.9750820385228	7.65938052599758	2.18179744371514	3	349.433354144652	7	0	1.71	2.14	2.71	7.71	4.29	2.29349866751365e-11	0.540903619643465	2.86681926437184e-11	5.82621463896862e-11
36	KAN2	154	2016	18.7223106588646	0	1.9031850448836	3	349.433354144652	7	0	1.71	2.14	2.71	7.71	4.29	2.29349866751365e-11	0.540903619643465	2.86681926437184e-11	5.82621463896862e-11
36	KAN2	155	2016	20.1123531562969	2.30125197921683	2.13220472175423	3	349.433354144652	7	0	1.71	2.14	2.71	7.71	4.29	2.29349866751365e-11	0.540903619643465	2.86681926437184e-11	5.82621463896862e-11
36	KAN2	156	2016	21.691419372634	0.856250966172158	1.97156792319298	3	349.433354144652	7	0	1.71	2.14	2.71	7.71	4.29	2.29349866751365e-11	0.540903619643465	2.86681926437184e-11	5.82621463896862e-11
36	KAN2	157	2016	20.3963022083358	0	1.95503320300673	3	349.433354144652	7	0	1.71	2.14	2.71	7.71	4.29	2.29349866751365e-11	0.540903619643465	2.86681926437184e-11	5.82621463896862e-11
36	KAN2	158	2016	19.8293960460993	5.73306066386852	1.74530832038973	3	349.433354144652	7	0	1.71	2.14	2.71	7.71	4.29	2.29349866751365e-11	0.540903619643465	2.86681926437184e-11	5.82621463896862e-11
36	KAN2	159	2016	17.4374274227638	0	2.67600992345925	3	349.433354144652	7	0	1.71	2.14	2.71	7.71	4.29	2.29349866751365e-11	0.540903619643465	2.86681926437184e-11	5.82621463896862e-11
37	KAN2	160	2016	15.763138710735	0	2.56027252744322	3	349.433354144652	7	0	1.71	2.14	2.71	7.71	4.29	2.29349866751365e-11	0.540903619643465	2.86681926437184e-11	5.82621463896862e-11
37	KAN2	161	2016	16.2662237147049	0	1.92653956300017	3	349.433354144652	7	0	1.71	2.14	2.71	7.71	4.29	2.29349866751365e-11	0.540903619643465	2.86681926437184e-11	5.82621463896862e-11
37	KAN2	162	2016	17.6305042019674	0	1.59974790710368	3	349.433354144652	7	0	1.71	2.14	2.71	7.71	4.29	2.29349866751365e-11	0.540903619643465	2.86681926437184e-11	5.82621463896862e-11
37	KAN2	163	2016	16.7788820936498	4.63162244415866	1.64586975912691	3	349.433354144652	7	0	1.71	2.14	2.71	7.71	4.29	2.29349866751365e-11	0.540903619643465	2.86681926437184e-11	5.82621463896862e-11
37	KAN2	164	2016	16.1059436659748	13.7616756192506	2.55487259502387	3	349.433354144652	7	0	1.71	2.14	2.71	7.71	4.29	2.29349866751365e-11	0.540903619643465	2.86681926437184e-11	5.82621463896862e-11
37	KAN2	165	2016	16.0995784008944	1.14183922037783	2.75595552731921	3	349.433354144652	7	0	1.71	2.14	2.71	7.71	4.29	2.29349866751365e-11	0.540903619643465	2.86681926437184e-11	5.82621463896862e-11
37	KAN2	166	2016	14.8569128217397	7.16446121218471	2.39119983847254	3	349.433354144652	7	0	1.71	2.14	2.71	7.71	4.29	2.29349866751365e-11	0.540903619643465	2.86681926437184e-11	5.82621463896862e-11
37	KAN2	167	2016	15.3502856070182	4.66354027358393	1.78226815951837	3	349.433354144652	7	0	1.71	2.14	2.71	7.71	4.29	2.29349866751365e-11	0.540903619643465	2.86681926437184e-11	5.82621463896862e-11
37	KAN2	168	2016	14.9525426577124	5.56934225791059	2.77464918943446	3	349.433354144652	7	0	1.71	2.14	2.71	7.71	4.29	2.29349866751365e-11	0.540903619643465	2.86681926437184e-11	5.82621463896862e-11
37	KAN2	169	2016	14.9067110588557	10.9136841223663	3.06901156259893	3	349.433354144652	7	0	1.71	2.14	2.71	7.71	4.29	2.29349866751365e-11	0.540903619643465	2.86681926437184e-11	5.82621463896862e-11
37	KAN2	170	2016	14.71228071165	0	2.4266423367916	3	349.433354144652	7	0	1.71	2.14	2.71	7.71	4.29	2.29349866751365e-11	0.540903619643465	2.86681926437184e-11	5.82621463896862e-11
37	KAN2	171	2016	15.4674667249667	12.603658867262	3.68583746970812	3	349.433354144652	7	0	1.71	2.14	2.71	7.71	4.29	2.29349866751365e-11	0.540903619643465	2.86681926437184e-11	5.82621463896862e-11
37	KAN2	172	2016	17.5333168355473	7.02108247295979	2.72630850443278	3	349.433354144652	7	0	1.71	2.14	2.71	7.71	4.29	2.29349866751365e-11	0.540903619643465	2.86681926437184e-11	5.82621463896862e-11
37	KAN2	173	2016	20.6711621915386	0	2.011553883381	3	349.433354144652	7	0	1.71	2.14	2.71	7.71	4.29	2.29349866751365e-11	0.540903619643465	2.86681926437184e-11	5.82621463896862e-11
37	KAN2	174	2016	24.7872028279799	26.863248422064	3.12416565218998	3	349.433354144652	7	0	1.71	2.14	2.71	7.71	4.29	2.29349866751365e-11	0.540903619643465	2.86681926437184e-11	5.82621463896862e-11
37	KAN2	175	2016	21.471942736179	0.2936877912655	2.4024730873315	3	349.433354144652	7	0	1.71	2.14	2.71	7.71	4.29	2.29349866751365e-11	0.540903619643465	2.86681926437184e-11	5.82621463896862e-11
37	KAN2	176	2016	16.2190001432177	20.7467274132881	2.64825612254045	3	349.433354144652	7	0	1.71	2.14	2.71	7.71	4.29	2.29349866751365e-11	0.540903619643465	2.86681926437184e-11	5.82621463896862e-11
37	KAN2	177	2016	14.5460073562498	6.02227302247371	2.97420379169114	3	349.433354144652	7	0	1.71	2.14	2.71	7.71	4.29	2.29349866751365e-11	0.540903619643465	2.86681926437184e-11	5.82621463896862e-11
37	KAN2	178	2016	14.806504270486	3.53951050111283	3.23236243233105	3	349.433354144652	7	0	1.71	2.14	2.71	7.71	4.29	2.29349866751365e-11	0.540903619643465	2.86681926437184e-11	5.82621463896862e-11
38	KAN2	179	2016	17.509447818572	7.59035352557747	2.11863017649168	3	349.433354144652	7	0	1.71	2.14	2.71	7.71	4.29	2.29349866751365e-11	0.540903619643465	2.86681926437184e-11	5.82621463896862e-11
38	KAN2	180	2016	17.0306484898002	0.119421109266135	3.8437299537298	3	349.433354144652	7	0	1.71	2.14	2.71	7.71	4.29	2.29349866751365e-11	0.540903619643465	2.86681926437184e-11	5.82621463896862e-11
38	KAN2	181	2016	17.3395013084108	4.54474867949754	3.35588987029719	3	349.433354144652	7	0	1.71	2.14	2.71	7.71	4.29	2.29349866751365e-11	0.540903619643465	2.86681926437184e-11	5.82621463896862e-11
38	KAN2	182	2016	18.7524841057444	7.77943468416418	4.00425084050771	3	349.433354144652	7	0	1.71	2.14	2.71	7.71	4.29	2.29349866751365e-11	0.540903619643465	2.86681926437184e-11	5.82621463896862e-11
38	KAN2	183	2016	14.8269605617159	3.77861397727491	3.95092937801411	3	349.433354144652	7	0	1.71	2.14	2.71	7.71	4.29	2.29349866751365e-11	0.540903619643465	2.86681926437184e-11	5.82621463896862e-11
38	KAN2	184	2016	15.0154644841828	2.38109537897025	3.01725274056479	3	349.433354144652	7	0	1.71	2.14	2.71	7.71	4.29	2.29349866751365e-11	0.540903619643465	2.86681926437184e-11	5.82621463896862e-11
38	KAN2	185	2016	17.2448129264193	0	1.84658989511491	3	349.433354144652	7	0	1.71	2.14	2.71	7.71	4.29	2.29349866751365e-11	0.540903619643465	2.86681926437184e-11	5.82621463896862e-11
38	KAN2	186	2016	16.5486040152965	0.203308081560878	3.99268062637107	3	349.433354144652	7	0	1.71	2.14	2.71	7.71	4.29	2.29349866751365e-11	0.540903619643465	2.86681926437184e-11	5.82621463896862e-11
38	KAN2	187	2016	15.5201486212416	0	3.31460114626724	3	349.433354144652	7	0	1.71	2.14	2.71	7.71	4.29	2.29349866751365e-11	0.540903619643465	2.86681926437184e-11	5.82621463896862e-11
38	KAN2	188	2016	16.6970425053323	0	1.66184937425049	3	349.433354144652	7	0	1.71	2.14	2.71	7.71	4.29	2.29349866751365e-11	0.540903619643465	2.86681926437184e-11	5.82621463896862e-11
38	KAN2	189	2016	19.1281064473837	0.570678312300998	3.33228305655868	3	349.433354144652	7	0	1.71	2.14	2.71	7.71	4.29	2.29349866751365e-11	0.540903619643465	2.86681926437184e-11	5.82621463896862e-11
38	KAN2	190	2016	19.9783258511797	0	2.98658567008804	3	349.433354144652	7	0	1.71	2.14	2.71	7.71	4.29	2.29349866751365e-11	0.540903619643465	2.86681926437184e-11	5.82621463896862e-11
38	KAN2	191	2016	23.6200366099894	0	3.24650866151787	3	349.433354144652	7	0	1.71	2.14	2.71	7.71	4.29	2.29349866751365e-11	0.540903619643465	2.86681926437184e-11	5.82621463896862e-11
38	KAN2	192	2016	19.8495212667234	0	4.00366353929616	3	349.433354144652	7	0	1.71	2.14	2.71	7.71	4.29	2.29349866751365e-11	0.540903619643465	2.86681926437184e-11	5.82621463896862e-11
38	KAN2	193	2016	17.7089909779789	1.50781480902041	2.83852605784001	3	349.433354144652	7	0	1.71	2.14	2.71	7.71	4.29	2.29349866751365e-11	0.540903619643465	2.86681926437184e-11	5.82621463896862e-11
38	KAN2	194	2016	15.0172958968774	1.51076097550529	2.53166066818363	3	349.433354144652	7	0	1.71	2.14	2.71	7.71	4.29	2.29349866751365e-11	0.540903619643465	2.86681926437184e-11	5.82621463896862e-11
38	KAN2	195	2016	14.3094432953935	0.700267514469054	3.41109269939951	3	349.433354144652	7	0	1.71	2.14	2.71	7.71	4.29	2.29349866751365e-11	0.540903619643465	2.86681926437184e-11	5.82621463896862e-11
38	KAN2	196	2016	16.094568612638	0	3.10697385601686	3	349.433354144652	7	0	1.71	2.14	2.71	7.71	4.29	2.29349866751365e-11	0.540903619643465	2.86681926437184e-11	5.82621463896862e-11
38	KAN2	197	2016	18.2603381190452	0	2.20789859303334	3	349.433354144652	7	0	1.71	2.14	2.71	7.71	4.29	2.29349866751365e-11	0.540903619643465	2.86681926437184e-11	5.82621463896862e-11
39	KAN2	198	2016	19.8340905791195	0.407685326015907	2.74241592251373	3	349.433354144652	7	0	1.71	2.14	2.71	7.71	4.29	2.29349866751365e-11	0.540903619643465	2.86681926437184e-11	5.82621463896862e-11
39	KAN2	199	2016	20.8353082989592	0	1.89102593249969	3	349.433354144652	7	0	1.71	2.14	2.71	7.71	4.29	2.29349866751365e-11	0.540903619643465	2.86681926437184e-11	5.82621463896862e-11
39	KAN2	200	2016	23.6801274750613	0	1.58156676925793	3	349.433354144652	7	0	1.71	2.14	2.71	7.71	4.29	2.29349866751365e-11	0.540903619643465	2.86681926437184e-11	5.82621463896862e-11
39	KAN2	201	2016	26.4314828780265	1.12031201656034	2.99573680792946	3	349.433354144652	7	0	1.71	2.14	2.71	7.71	4.29	2.29349866751365e-11	0.540903619643465	2.86681926437184e-11	5.82621463896862e-11
39	KAN2	202	2016	23.8428001140919	0	2.34317867685614	3	349.433354144652	7	0	1.71	2.14	2.71	7.71	4.29	2.29349866751365e-11	0.540903619643465	2.86681926437184e-11	5.82621463896862e-11
39	KAN2	203	2016	22.3816147462186	5.88465562634965	2.14775464929295	3	349.433354144652	7	0	1.71	2.14	2.71	7.71	4.29	2.29349866751365e-11	0.540903619643465	2.86681926437184e-11	5.82621463896862e-11
39	KAN2	204	2016	21.4421700338193	0	1.74154504872494	3	349.433354144652	7	0	1.71	2.14	2.71	7.71	4.29	2.29349866751365e-11	0.540903619643465	2.86681926437184e-11	5.82621463896862e-11
39	KAN2	205	2016	21.527597288197	0	1.55430358609949	3	349.433354144652	7	0	1.71	2.14	2.71	7.71	4.29	2.29349866751365e-11	0.540903619643465	2.86681926437184e-11	5.82621463896862e-11
39	KAN2	206	2016	21.5680780602376	0.0454022730137067	2.22805050327824	3	349.433354144652	7	0	1.71	2.14	2.71	7.71	4.29	2.29349866751365e-11	0.540903619643465	2.86681926437184e-11	5.82621463896862e-11
39	KAN2	207	2016	20.2278605597337	0	1.55215840102581	3	349.433354144652	7	0	1.71	2.14	2.71	7.71	4.29	2.29349866751365e-11	0.540903619643465	2.86681926437184e-11	5.82621463896862e-11
39	KAN2	208	2016	19.687486104944	0.460443740185542	2.74184235969571	3	349.433354144652	7	0	1.71	2.14	2.71	7.71	4.29	2.29349866751365e-11	0.540903619643465	2.86681926437184e-11	5.82621463896862e-11
39	KAN2	209	2016	19.8709191669232	2.0595277097842	2.32967521503531	3	349.433354144652	7	0	1.71	2.14	2.71	7.71	4.29	2.29349866751365e-11	0.540903619643465	2.86681926437184e-11	5.82621463896862e-11
39	KAN2	210	2016	18.9762285920155	2.52904830707652	3.01693002206697	3	349.433354144652	7	0	1.71	2.14	2.71	7.71	4.29	2.29349866751365e-11	0.540903619643465	2.86681926437184e-11	5.82621463896862e-11
39	KAN2	211	2016	18.2794629285172	1.02190500639405	2.42941537136799	3	349.433354144652	7	0	1.71	2.14	2.71	7.71	4.29	2.29349866751365e-11	0.540903619643465	2.86681926437184e-11	5.82621463896862e-11
39	KAN2	212	2016	16.8848620486014	1.64685761948064	2.33562434491831	3	349.433354144652	7	0	1.71	2.14	2.71	7.71	4.29	2.29349866751365e-11	0.540903619643465	2.86681926437184e-11	5.82621463896862e-11
39	KAN2	213	2016	16.1708084365032	5.94820371600658	2.24283670239711	3	349.433354144652	7	0	1.71	2.14	2.71	7.71	4.29	2.29349866751365e-11	0.540903619643465	2.86681926437184e-11	5.82621463896862e-11
39	KAN2	214	2016	16.2276674915496	8.04466067462579	2.90662909981489	3	349.433354144652	7	0	1.71	2.14	2.71	7.71	4.29	2.29349866751365e-11	0.540903619643465	2.86681926437184e-11	5.82621463896862e-11
39	KAN2	215	2016	18.4602114292123	12.3724128961901	4.08858640781723	3	349.433354144652	7	0	1.71	2.14	2.71	7.71	4.29	2.29349866751365e-11	0.540903619643465	2.86681926437184e-11	5.82621463896862e-11
39	KAN2	216	2016	17.5905205419953	0.659499146263725	3.32541467572972	3	349.433354144652	7	0	1.71	2.14	2.71	7.71	4.29	2.29349866751365e-11	0.540903619643465	2.86681926437184e-11	5.82621463896862e-11
39	KAN2	217	2016	17.1580906486998	0.677461936399863	2.67305203759292	3	349.433354144652	7	0	1.71	2.14	2.71	7.71	4.29	2.29349866751365e-11	0.540903619643465	2.86681926437184e-11	5.82621463896862e-11
39	KAN2	218	2016	16.691985290214	1.13908215146664	2.6413949443382	3	349.433354144652	7	0	1.71	2.14	2.71	7.71	4.29	2.29349866751365e-11	0.540903619643465	2.86681926437184e-11	5.82621463896862e-11
39	KAN2	219	2016	19.2954197670122	0	2.98610971326717	3	349.433354144652	7	0	1.71	2.14	2.71	7.71	4.29	2.29349866751365e-11	0.540903619643465	2.86681926437184e-11	5.82621463896862e-11
39	KAN2	220	2016	17.834015812461	0.301073844649943	3.84884953419372	3	349.433354144652	7	0	1.71	2.14	2.71	7.71	4.29	2.29349866751365e-11	0.540903619643465	2.86681926437184e-11	5.82621463896862e-11
39	KAN2	221	2016	14.6290448300058	1.38909508929049	2.61756636000387	3	349.433354144652	7	0	1.71	2.14	2.71	7.71	4.29	2.29349866751365e-11	0.540903619643465	2.86681926437184e-11	5.82621463896862e-11
39	KAN2	222	2016	12.9473929467732	1.96212486463262	2.38708079423844	3	349.433354144652	7	0	1.71	2.14	2.71	7.71	4.29	2.29349866751365e-11	0.540903619643465	2.86681926437184e-11	5.82621463896862e-11
39	KAN2	223	2016	12.1529530840894	6.96212322188782	3.33172365366179	3	349.433354144652	7	0	1.71	2.14	2.71	7.71	4.29	2.29349866751365e-11	0.540903619643465	2.86681926437184e-11	5.82621463896862e-11
39	KAN2	224	2016	18.3912346540493	0.393161847979358	3.25062385067794	3	349.433354144652	7	0	1.71	2.14	2.71	7.71	4.29	2.29349866751365e-11	0.540903619643465	2.86681926437184e-11	5.82621463896862e-11
39	KAN2	225	2016	18.3891968544065	0	3.28392005791141	3	349.433354144652	7	0	1.71	2.14	2.71	7.71	4.29	2.29349866751365e-11	0.540903619643465	2.86681926437184e-11	5.82621463896862e-11
40	KAN2	226	2016	18.095818839092	0	1.86560990205201	3	349.433354144652	7	0	1.71	2.14	2.71	7.71	4.29	2.29349866751365e-11	0.540903619643465	2.86681926437184e-11	5.82621463896862e-11
40	KAN2	227	2016	17.6577413032607	0	2.18238973222537	3	349.433354144652	7	0	1.71	2.14	2.71	7.71	4.29	2.29349866751365e-11	0.540903619643465	2.86681926437184e-11	5.82621463896862e-11
40	KAN2	228	2016	17.5440102803263	0	2.23272308699059	3	349.433354144652	7	0	1.71	2.14	2.71	7.71	4.29	2.29349866751365e-11	0.540903619643465	2.86681926437184e-11	5.82621463896862e-11
40	KAN2	229	2016	18.4607623111256	0	2.29512410825152	3	349.433354144652	7	0	1.71	2.14	2.71	7.71	4.29	2.29349866751365e-11	0.540903619643465	2.86681926437184e-11	5.82621463896862e-11
40	KAN2	230	2016	18.7700819171151	0	1.8193989852027	3	349.433354144652	7	0	1.71	2.14	2.71	7.71	4.29	2.29349866751365e-11	0.540903619643465	2.86681926437184e-11	5.82621463896862e-11
40	KAN2	231	2016	19.7548005960805	0.831484576822085	1.97504578970001	3	349.433354144652	7	0	1.71	2.14	2.71	7.71	4.29	2.29349866751365e-11	0.540903619643465	2.86681926437184e-11	5.82621463896862e-11
40	KAN2	232	2016	19.5220039864666	0.49589497783313	3.30180737461723	3	349.433354144652	7	0	1.71	2.14	2.71	7.71	4.29	2.29349866751365e-11	0.540903619643465	2.86681926437184e-11	5.82621463896862e-11
40	KAN2	233	2016	16.7675872570226	4.38109112975371	4.06404990300431	3	349.433354144652	7	0	1.71	2.14	2.71	7.71	4.29	2.29349866751365e-11	0.540903619643465	2.86681926437184e-11	5.82621463896862e-11
40	KAN2	234	2016	17.105605342969	0.584267917050417	2.94551450805613	3	349.433354144652	7	0	1.71	2.14	2.71	7.71	4.29	2.29349866751365e-11	0.540903619643465	2.86681926437184e-11	5.82621463896862e-11
40	KAN2	235	2016	21.2234019942744	0	1.76511809791842	3	349.433354144652	7	0	1.71	2.14	2.71	7.71	4.29	2.29349866751365e-11	0.540903619643465	2.86681926437184e-11	5.82621463896862e-11
40	KAN2	236	2016	24.8126270116606	0	2.73426343186325	3	349.433354144652	7	0	1.71	2.14	2.71	7.71	4.29	2.29349866751365e-11	0.540903619643465	2.86681926437184e-11	5.82621463896862e-11
40	KAN2	237	2016	26.5173471543362	0	3.03636229114222	3	349.433354144652	7	0	1.71	2.14	2.71	7.71	4.29	2.29349866751365e-11	0.540903619643465	2.86681926437184e-11	5.82621463896862e-11
40	KAN2	238	2016	25.5947742731303	0	2.25632908406651	3	349.433354144652	7	0	1.71	2.14	2.71	7.71	4.29	2.29349866751365e-11	0.540903619643465	2.86681926437184e-11	5.82621463896862e-11
40	KAN2	239	2016	24.4442097469522	1.64440616146757	2.38712927473519	3	349.433354144652	7	0	1.71	2.14	2.71	7.71	4.29	2.29349866751365e-11	0.540903619643465	2.86681926437184e-11	5.82621463896862e-11
40	KAN2	240	2016	23.4080077753333	0.302253363205701	3.38824195178547	3	349.433354144652	7	0	1.71	2.14	2.71	7.71	4.29	2.29349866751365e-11	0.540903619643465	2.86681926437184e-11	5.82621463896862e-11
40	KAN2	241	2016	18.11950866205	0.647273439587655	2.56184638813202	3	349.433354144652	7	0	1.71	2.14	2.71	7.71	4.29	2.29349866751365e-11	0.540903619643465	2.86681926437184e-11	5.82621463896862e-11
40	KAN2	242	2016	17.6367864345377	0	1.55040349932416	3	349.433354144652	7	0	1.71	2.14	2.71	7.71	4.29	2.29349866751365e-11	0.540903619643465	2.86681926437184e-11	5.82621463896862e-11
40	KAN2	243	2016	19.1837732582254	0	1.94707726897864	3	349.433354144652	7	0	1.71	2.14	2.71	7.71	4.29	2.29349866751365e-11	0.540903619643465	2.86681926437184e-11	5.82621463896862e-11
40	KAN2	244	2016	18.3082425730568	0	2.02910684957068	3	349.433354144652	7	0	1.71	2.14	2.71	7.71	4.29	2.29349866751365e-11	0.540903619643465	2.86681926437184e-11	5.82621463896862e-11
40	KAN2	245	2016	18.3783564602477	0.0568974067288945	2.15810894652234	3	349.433354144652	7	0	1.71	2.14	2.71	7.71	4.29	2.29349866751365e-11	0.540903619643465	2.86681926437184e-11	5.82621463896862e-11
40	KAN2	246	2016	18.5991806066302	0.511311915523878	2.34582960136645	3	349.433354144652	7	0	1.71	2.14	2.71	7.71	4.29	2.29349866751365e-11	0.540903619643465	2.86681926437184e-11	5.82621463896862e-11
40	KAN2	247	2016	18.3759254262474	11.902478397131	4.45259460227416	3	349.433354144652	7	0	1.71	2.14	2.71	7.71	4.29	2.29349866751365e-11	0.540903619643465	2.86681926437184e-11	5.82621463896862e-11
40	KAN2	248	2016	17.4768197746569	0	2.97521582405333	3	349.433354144652	7	0	1.71	2.14	2.71	7.71	4.29	2.29349866751365e-11	0.540903619643465	2.86681926437184e-11	5.82621463896862e-11
40	KAN2	249	2016	18.7657813496074	0	1.51820889657762	3	349.433354144652	7	0	1.71	2.14	2.71	7.71	4.29	2.29349866751365e-11	0.540903619643465	2.86681926437184e-11	5.82621463896862e-11
41	KAN2	250	2016	20.1395884633941	0	2.09837520936776	3	349.433354144652	7	0	1.71	2.14	2.71	7.71	4.29	2.29349866751365e-11	0.540903619643465	2.86681926437184e-11	5.82621463896862e-11
41	KAN2	251	2016	21.6718726375738	0	2.81021694364396	3	349.433354144652	7	0	1.71	2.14	2.71	7.71	4.29	2.29349866751365e-11	0.540903619643465	2.86681926437184e-11	5.82621463896862e-11
41	KAN2	252	2016	18.2231684751982	0	1.79197365633972	3	349.433354144652	7	0	1.71	2.14	2.71	7.71	4.29	2.29349866751365e-11	0.540903619643465	2.86681926437184e-11	5.82621463896862e-11
41	KAN2	253	2016	18.6406242187855	0	1.50072620055102	3	349.433354144652	7	0	1.71	2.14	2.71	7.71	4.29	2.29349866751365e-11	0.540903619643465	2.86681926437184e-11	5.82621463896862e-11
41	KAN2	254	2016	19.7059389544693	0	1.3814380309227	3	349.433354144652	7	0	1.71	2.14	2.71	7.71	4.29	2.29349866751365e-11	0.540903619643465	2.86681926437184e-11	5.82621463896862e-11
41	KAN2	255	2016	22.5327903119106	0	1.63943409197976	3	349.433354144652	7	0	1.71	2.14	2.71	7.71	4.29	2.29349866751365e-11	0.540903619643465	2.86681926437184e-11	5.82621463896862e-11
41	KAN2	256	2016	24.794198645353	0	2.12481884033224	3	349.433354144652	7	0	1.71	2.14	2.71	7.71	4.29	2.29349866751365e-11	0.540903619643465	2.86681926437184e-11	5.82621463896862e-11
41	KAN2	257	2016	25.2896840912939	0	2.38429036045002	3	349.433354144652	7	0	1.71	2.14	2.71	7.71	4.29	2.29349866751365e-11	0.540903619643465	2.86681926437184e-11	5.82621463896862e-11
41	KAN2	258	2016	23.7097563223501	5.40128915385717	3.20696019911533	3	349.433354144652	7	0	1.71	2.14	2.71	7.71	4.29	2.29349866751365e-11	0.540903619643465	2.86681926437184e-11	5.82621463896862e-11
41	KAN2	259	2016	18.2938826151409	0	2.56131867164603	3	349.433354144652	7	0	1.71	2.14	2.71	7.71	4.29	2.29349866751365e-11	0.540903619643465	2.86681926437184e-11	5.82621463896862e-11
41	KAN2	260	2016	17.2849045895308	0.028370657581402	2.12149427099907	3	349.433354144652	7	0	1.71	2.14	2.71	7.71	4.29	2.29349866751365e-11	0.540903619643465	2.86681926437184e-11	5.82621463896862e-11
41	KAN2	261	2016	16.7244709309933	0	3.07678146433666	3	349.433354144652	7	0	1.71	2.14	2.71	7.71	4.29	2.29349866751365e-11	0.540903619643465	2.86681926437184e-11	5.82621463896862e-11
41	KAN2	262	2016	14.9200141578042	0	1.79505955501454	3	349.433354144652	7	0	1.71	2.14	2.71	7.71	4.29	2.29349866751365e-11	0.540903619643465	2.86681926437184e-11	5.82621463896862e-11
41	KAN2	263	2016	15.0043283738153	0	1.16901778830861	3	349.433354144652	7	0	1.71	2.14	2.71	7.71	4.29	2.29349866751365e-11	0.540903619643465	2.86681926437184e-11	5.82621463896862e-11
41	KAN2	264	2016	15.8476888216529	0	1.67323151460589	3	349.433354144652	7	0	1.71	2.14	2.71	7.71	4.29	2.29349866751365e-11	0.540903619643465	2.86681926437184e-11	5.82621463896862e-11
41	KAN2	265	2016	14.8879909798973	0	1.51407699351115	3	349.433354144652	7	0	1.71	2.14	2.71	7.71	4.29	2.29349866751365e-11	0.540903619643465	2.86681926437184e-11	5.82621463896862e-11
41	KAN2	266	2016	14.9680087509119	0.141982758191883	1.69526311188056	3	349.433354144652	7	0	1.71	2.14	2.71	7.71	4.29	2.29349866751365e-11	0.540903619643465	2.86681926437184e-11	5.82621463896862e-11
41	KAN2	267	2016	16.7005277515959	0	2.16878432735784	3	349.433354144652	7	0	1.71	2.14	2.71	7.71	4.29	2.29349866751365e-11	0.540903619643465	2.86681926437184e-11	5.82621463896862e-11
41	KAN2	268	2016	18.5291339814205	0	3.23637078691789	3	349.433354144652	7	0	1.71	2.14	2.71	7.71	4.29	2.29349866751365e-11	0.540903619643465	2.86681926437184e-11	5.82621463896862e-11
41	KAN2	269	2016	14.8450986034189	0	1.5939331356294	3	349.433354144652	7	0	1.71	2.14	2.71	7.71	4.29	2.29349866751365e-11	0.540903619643465	2.86681926437184e-11	5.82621463896862e-11
41	KAN2	270	2016	14.5151869419583	0	1.43346457911427	3	349.433354144652	7	0	1.71	2.14	2.71	7.71	4.29	2.29349866751365e-11	0.540903619643465	2.86681926437184e-11	5.82621463896862e-11
41	KAN2	271	2016	18.3274915696191	0	4.23054100616205	3	349.433354144652	7	0	1.71	2.14	2.71	7.71	4.29	2.29349866751365e-11	0.540903619643465	2.86681926437184e-11	5.82621463896862e-11
41	KAN2	272	2016	17.9969646668985	2.09024820620954	5.3603496339583	3	349.433354144652	7	0	1.71	2.14	2.71	7.71	4.29	2.29349866751365e-11	0.540903619643465	2.86681926437184e-11	5.82621463896862e-11
41	KAN2	273	2016	14.7071692987592	0.0561896230841006	2.83433253829994	3	349.433354144652	7	0	1.71	2.14	2.71	7.71	4.29	2.29349866751365e-11	0.540903619643465	2.86681926437184e-11	5.82621463896862e-11
41	KAN2	274	2016	14.1777491273236	4.52543039437553	2.13637134064106	3	349.433354144652	7	0	1.71	2.14	2.71	7.71	4.29	2.29349866751365e-11	0.540903619643465	2.86681926437184e-11	5.82621463896862e-11
42	KAN2	275	2016	12.2007720507915	1.73389428646662	4.19290508070942	3	349.433354144652	7	0	1.71	2.14	2.71	7.71	4.29	2.29349866751365e-11	0.540903619643465	2.86681926437184e-11	5.82621463896862e-11
42	KAN2	276	2016	13.7766741875346	4.796159890126	2.70812624265951	3	349.433354144652	7	0	1.71	2.14	2.71	7.71	4.29	2.29349866751365e-11	0.540903619643465	2.86681926437184e-11	5.82621463896862e-11
42	KAN2	277	2016	13.1940300018757	0	3.00862864760875	3	349.433354144652	7	0	1.71	2.14	2.71	7.71	4.29	2.29349866751365e-11	0.540903619643465	2.86681926437184e-11	5.82621463896862e-11
42	KAN2	278	2016	10.1063674857622	0	3.87378082232882	3	349.433354144652	7	0	1.71	2.14	2.71	7.71	4.29	2.29349866751365e-11	0.540903619643465	2.86681926437184e-11	5.82621463896862e-11
42	KAN2	279	2016	9.22566719404977	0	3.26461152677938	3	349.433354144652	7	0	1.71	2.14	2.71	7.71	4.29	2.29349866751365e-11	0.540903619643465	2.86681926437184e-11	5.82621463896862e-11
42	KAN2	280	2016	11.9395156613587	0.00234952000987398	2.73707371977039	3	349.433354144652	7	0	1.71	2.14	2.71	7.71	4.29	2.29349866751365e-11	0.540903619643465	2.86681926437184e-11	5.82621463896862e-11
42	KAN2	281	2016	10.4370795532211	0	2.26009934529203	3	349.433354144652	7	0	1.71	2.14	2.71	7.71	4.29	2.29349866751365e-11	0.540903619643465	2.86681926437184e-11	5.82621463896862e-11
42	KAN2	282	2016	9.027551027022	0.0358686268238051	1.39130321766471	3	349.433354144652	7	0	1.71	2.14	2.71	7.71	4.29	2.29349866751365e-11	0.540903619643465	2.86681926437184e-11	5.82621463896862e-11
42	KAN2	283	2016	8.22833417325971	0	1.16265352592072	3	349.433354144652	7	0	1.71	2.14	2.71	7.71	4.29	2.29349866751365e-11	0.540903619643465	2.86681926437184e-11	5.82621463896862e-11
42	KAN2	284	2016	7.81170183895763	0.87049503936743	1.56727170967564	3	349.433354144652	7	0	1.71	2.14	2.71	7.71	4.29	2.29349866751365e-11	0.540903619643465	2.86681926437184e-11	5.82621463896862e-11
42	KAN2	285	2016	8.78475745769673	0	2.76823693639919	3	349.433354144652	7	0	1.71	2.14	2.71	7.71	4.29	2.29349866751365e-11	0.540903619643465	2.86681926437184e-11	5.82621463896862e-11
42	KAN2	286	2016	9.1514684278001	0	4.44249728283644	3	349.433354144652	7	0	1.71	2.14	2.71	7.71	4.29	2.29349866751365e-11	0.540903619643465	2.86681926437184e-11	5.82621463896862e-11
42	KAN2	287	2016	10.4902052411094	1.08467832348625	3.7323370762994	3	349.433354144652	7	0	1.71	2.14	2.71	7.71	4.29	2.29349866751365e-11	0.540903619643465	2.86681926437184e-11	5.82621463896862e-11
42	KAN2	288	2016	11.1451689258118	0.338040634174832	2.98086227371722	3	349.433354144652	7	0	1.71	2.14	2.71	7.71	4.29	2.29349866751365e-11	0.540903619643465	2.86681926437184e-11	5.82621463896862e-11
42	KAN2	289	2016	13.0797572902362	0	2.58019495038862	3	349.433354144652	7	0	1.71	2.14	2.71	7.71	4.29	2.29349866751365e-11	0.540903619643465	2.86681926437184e-11	5.82621463896862e-11
42	KAN2	290	2016	12.593948032198	0	2.20367184713149	3	349.433354144652	7	0	1.71	2.14	2.71	7.71	4.29	2.29349866751365e-11	0.540903619643465	2.86681926437184e-11	5.82621463896862e-11
42	KAN2	291	2016	10.7591636211512	8.37736525667079	3.16315376694473	3	349.433354144652	7	0	1.71	2.14	2.71	7.71	4.29	2.29349866751365e-11	0.540903619643465	2.86681926437184e-11	5.82621463896862e-11
42	KAN2	292	2016	8.3604621269428	16.672133395303	4.31154437708523	3	349.433354144652	7	0	1.71	2.14	2.71	7.71	4.29	2.29349866751365e-11	0.540903619643465	2.86681926437184e-11	5.82621463896862e-11
42	KAN2	293	2016	7.79791679455996	3.12922063602005	1.83273272895474	3	349.433354144652	7	0	1.71	2.14	2.71	7.71	4.29	2.29349866751365e-11	0.540903619643465	2.86681926437184e-11	5.82621463896862e-11
42	KAN2	294	2016	7.92443348844161	4.09569043102804	2.29342292306522	3	349.433354144652	7	0	1.71	2.14	2.71	7.71	4.29	2.29349866751365e-11	0.540903619643465	2.86681926437184e-11	5.82621463896862e-11
42	KAN2	295	2016	7.63004275156796	0	1.73641573009308	3	349.433354144652	7	0	1.71	2.14	2.71	7.71	4.29	2.29349866751365e-11	0.540903619643465	2.86681926437184e-11	5.82621463896862e-11
42	KAN2	296	2016	5.30376531924066	0	1.73452955029347	3	349.433354144652	7	0	1.71	2.14	2.71	7.71	4.29	2.29349866751365e-11	0.540903619643465	2.86681926437184e-11	5.82621463896862e-11
42	KAN2	297	2016	8.00801143559822	4.43543588689627	1.80170473446559	3	349.433354144652	7	0	1.71	2.14	2.71	7.71	4.29	2.29349866751365e-11	0.540903619643465	2.86681926437184e-11	5.82621463896862e-11
42	KAN2	298	2016	9.0693812664831	0	1.62047568578376	3	349.433354144652	7	0	1.71	2.14	2.71	7.71	4.29	2.29349866751365e-11	0.540903619643465	2.86681926437184e-11	5.82621463896862e-11
42	KAN2	299	2016	9.6785782975651	0.146964450892428	1.13345246125584	3	349.433354144652	7	0	1.71	2.14	2.71	7.71	4.29	2.29349866751365e-11	0.540903619643465	2.86681926437184e-11	5.82621463896862e-11
43	PLI2	121	2016	8.98225024840225	0	4.06888853551335	3	350.501167446727	6	0	2.43	2.57	3.29	7.71	6	0.033384823609864	0.491874943691429	5.82621463896862e-11	5.82621463896862e-11
43	PLI2	122	2016	12.2607195690963	2.9367963949302	1.6526180941964	3	350.501167446727	6	0	2.43	2.57	3.29	7.71	6	0.033384823609864	0.491874943691429	5.82621463896862e-11	5.82621463896862e-11
43	PLI2	123	2016	10.986741041598	0	3.54401487801536	3	350.501167446727	6	0	2.43	2.57	3.29	7.71	6	0.033384823609864	0.491874943691429	5.82621463896862e-11	5.82621463896862e-11
43	PLI2	124	2016	9.64104662192605	0	1.84828017317655	3	350.501167446727	6	0	2.43	2.57	3.29	7.71	6	0.033384823609864	0.491874943691429	5.82621463896862e-11	5.82621463896862e-11
43	PLI2	125	2016	13.797606137376	0	3.34337490776678	3	350.501167446727	6	0	2.43	2.57	3.29	7.71	6	0.033384823609864	0.491874943691429	5.82621463896862e-11	5.82621463896862e-11
43	PLI2	126	2016	17.8904624318321	0	3.49412336572745	3	350.501167446727	6	0	2.43	2.57	3.29	7.71	6	0.033384823609864	0.491874943691429	5.82621463896862e-11	5.82621463896862e-11
43	PLI2	127	2016	20.0490404465555	0	3.22018592234839	3	350.501167446727	6	0	2.43	2.57	3.29	7.71	6	0.033384823609864	0.491874943691429	5.82621463896862e-11	5.82621463896862e-11
43	PLI2	128	2016	20.3800512538234	0	4.54010508515043	3	350.501167446727	6	0	2.43	2.57	3.29	7.71	6	0.033384823609864	0.491874943691429	5.82621463896862e-11	5.82621463896862e-11
43	PLI2	129	2016	20.1195011411271	0	4.26185629413869	3	350.501167446727	6	0	2.43	2.57	3.29	7.71	6	0.033384823609864	0.491874943691429	5.82621463896862e-11	5.82621463896862e-11
43	PLI2	130	2016	19.0312548925023	0	2.86909690435921	3	350.501167446727	6	0	2.43	2.57	3.29	7.71	6	0.033384823609864	0.491874943691429	5.82621463896862e-11	5.82621463896862e-11
43	PLI2	131	2016	20.4334483281239	0	3.26824858398721	3	350.501167446727	6	0	2.43	2.57	3.29	7.71	6	0.033384823609864	0.491874943691429	5.82621463896862e-11	5.82621463896862e-11
43	PLI2	132	2016	20.0661460927484	0	3.65061464771055	3	350.501167446727	6	0	2.43	2.57	3.29	7.71	6	0.033384823609864	0.491874943691429	5.82621463896862e-11	5.82621463896862e-11
43	PLI2	133	2016	17.3995757974513	0	3.34044267285012	3	350.501167446727	6	0	2.43	2.57	3.29	7.71	6	0.033384823609864	0.491874943691429	5.82621463896862e-11	5.82621463896862e-11
43	PLI2	134	2016	8.86770479613792	0.590352776866637	4.78840317007741	3	350.501167446727	6	0	2.43	2.57	3.29	7.71	6	0.033384823609864	0.491874943691429	5.82621463896862e-11	5.82621463896862e-11
43	PLI2	135	2016	8.38335895923746	0.235193228547741	4.18543106668145	3	350.501167446727	6	0	2.43	2.57	3.29	7.71	6	0.033384823609864	0.491874943691429	5.82621463896862e-11	5.82621463896862e-11
43	PLI2	136	2016	9.02414687736028	0.0412933386922987	2.90912589587835	3	350.501167446727	6	0	2.43	2.57	3.29	7.71	6	0.033384823609864	0.491874943691429	5.82621463896862e-11	5.82621463896862e-11
43	PLI2	137	2016	12.5485244870355	0	2.88204376034905	3	350.501167446727	6	0	2.43	2.57	3.29	7.71	6	0.033384823609864	0.491874943691429	5.82621463896862e-11	5.82621463896862e-11
43	PLI2	138	2016	14.0374758436705	1.6731431791796	2.80937046558795	3	350.501167446727	6	0	2.43	2.57	3.29	7.71	6	0.033384823609864	0.491874943691429	5.82621463896862e-11	5.82621463896862e-11
44	PLI2	139	2016	13.4158120124102	0.0941877362587322	2.13031579782208	3	350.501167446727	6	0	2.43	2.57	3.29	7.71	6	0.033384823609864	0.491874943691429	5.82621463896862e-11	5.82621463896862e-11
44	PLI2	140	2016	13.553500752196	2.00017424189931	3.40109645835291	3	350.501167446727	6	0	2.43	2.57	3.29	7.71	6	0.033384823609864	0.491874943691429	5.82621463896862e-11	5.82621463896862e-11
44	PLI2	141	2016	18.4358768948143	0	3.31750823551595	3	350.501167446727	6	0	2.43	2.57	3.29	7.71	6	0.033384823609864	0.491874943691429	5.82621463896862e-11	5.82621463896862e-11
44	PLI2	142	2016	17.7665183287475	4.683856976606	3.50607052974037	3	350.501167446727	6	0	2.43	2.57	3.29	7.71	6	0.033384823609864	0.491874943691429	5.82621463896862e-11	5.82621463896862e-11
44	PLI2	143	2016	12.98762944112	6.4993152632314	3.96963784952095	3	350.501167446727	6	0	2.43	2.57	3.29	7.71	6	0.033384823609864	0.491874943691429	5.82621463896862e-11	5.82621463896862e-11
44	PLI2	144	2016	10.8972809586511	0	3.46752429820911	3	350.501167446727	6	0	2.43	2.57	3.29	7.71	6	0.033384823609864	0.491874943691429	5.82621463896862e-11	5.82621463896862e-11
44	PLI2	145	2016	13.1261151696495	0	1.41003243499083	3	350.501167446727	6	0	2.43	2.57	3.29	7.71	6	0.033384823609864	0.491874943691429	5.82621463896862e-11	5.82621463896862e-11
44	PLI2	146	2016	15.6110215757154	0.739576788052936	1.57438683107676	3	350.501167446727	6	0	2.43	2.57	3.29	7.71	6	0.033384823609864	0.491874943691429	5.82621463896862e-11	5.82621463896862e-11
44	PLI2	147	2016	16.4408338711881	1.65746034628798	2.02716720418509	3	350.501167446727	6	0	2.43	2.57	3.29	7.71	6	0.033384823609864	0.491874943691429	5.82621463896862e-11	5.82621463896862e-11
44	PLI2	148	2016	18.7613171068645	0.215151797880912	1.6602646374148	3	350.501167446727	6	0	2.43	2.57	3.29	7.71	6	0.033384823609864	0.491874943691429	5.82621463896862e-11	5.82621463896862e-11
44	PLI2	149	2016	17.198352358532	4.14455810324345	2.55979167960473	3	350.501167446727	6	0	2.43	2.57	3.29	7.71	6	0.033384823609864	0.491874943691429	5.82621463896862e-11	5.82621463896862e-11
44	PLI2	150	2016	17.3616718088192	19.7979502239456	3.35428280199473	3	350.501167446727	6	0	2.43	2.57	3.29	7.71	6	0.033384823609864	0.491874943691429	5.82621463896862e-11	5.82621463896862e-11
44	PLI2	151	2016	18.0839350502141	1.91999992141695	2.69413335406307	3	350.501167446727	6	0	2.43	2.57	3.29	7.71	6	0.033384823609864	0.491874943691429	5.82621463896862e-11	5.82621463896862e-11
44	PLI2	152	2016	17.9041854274271	41.4513467809995	2.3594969419827	3	350.501167446727	6	0	2.43	2.57	3.29	7.71	6	0.033384823609864	0.491874943691429	5.82621463896862e-11	5.82621463896862e-11
44	PLI2	153	2016	18.9467099936097	7.45627088054936	2.18183423815135	3	350.501167446727	6	0	2.43	2.57	3.29	7.71	6	0.033384823609864	0.491874943691429	5.82621463896862e-11	5.82621463896862e-11
44	PLI2	154	2016	18.7738031056624	0	1.90388932798674	3	350.501167446727	6	0	2.43	2.57	3.29	7.71	6	0.033384823609864	0.491874943691429	5.82621463896862e-11	5.82621463896862e-11
44	PLI2	155	2016	20.1855162318756	2.11946644452172	2.13274479585722	3	350.501167446727	6	0	2.43	2.57	3.29	7.71	6	0.033384823609864	0.491874943691429	5.82621463896862e-11	5.82621463896862e-11
44	PLI2	156	2016	21.7273719936704	0.773183675884359	1.97325412932499	3	350.501167446727	6	0	2.43	2.57	3.29	7.71	6	0.033384823609864	0.491874943691429	5.82621463896862e-11	5.82621463896862e-11
44	PLI2	157	2016	20.3257379214136	0	1.95661631368634	3	350.501167446727	6	0	2.43	2.57	3.29	7.71	6	0.033384823609864	0.491874943691429	5.82621463896862e-11	5.82621463896862e-11
44	PLI2	158	2016	19.8242919760308	5.55303734383835	1.74569392172289	3	350.501167446727	6	0	2.43	2.57	3.29	7.71	6	0.033384823609864	0.491874943691429	5.82621463896862e-11	5.82621463896862e-11
44	PLI2	159	2016	17.3934539241008	0	2.67712767284375	3	350.501167446727	6	0	2.43	2.57	3.29	7.71	6	0.033384823609864	0.491874943691429	5.82621463896862e-11	5.82621463896862e-11
45	PLI2	160	2016	15.7173567196339	0	2.56063765979316	3	350.501167446727	6	0	2.43	2.57	3.29	7.71	6	0.033384823609864	0.491874943691429	5.82621463896862e-11	5.82621463896862e-11
45	PLI2	161	2016	16.211846271614	0	1.9286195048838	3	350.501167446727	6	0	2.43	2.57	3.29	7.71	6	0.033384823609864	0.491874943691429	5.82621463896862e-11	5.82621463896862e-11
45	PLI2	162	2016	17.522427140134	0	1.59990276211438	3	350.501167446727	6	0	2.43	2.57	3.29	7.71	6	0.033384823609864	0.491874943691429	5.82621463896862e-11	5.82621463896862e-11
45	PLI2	163	2016	16.726869355057	5.05003559086369	1.64515722089891	3	350.501167446727	6	0	2.43	2.57	3.29	7.71	6	0.033384823609864	0.491874943691429	5.82621463896862e-11	5.82621463896862e-11
45	PLI2	164	2016	16.0846703881355	13.4839441699976	2.55418290085459	3	350.501167446727	6	0	2.43	2.57	3.29	7.71	6	0.033384823609864	0.491874943691429	5.82621463896862e-11	5.82621463896862e-11
45	PLI2	165	2016	16.070172276923	1.18702276856351	2.75533661710826	3	350.501167446727	6	0	2.43	2.57	3.29	7.71	6	0.033384823609864	0.491874943691429	5.82621463896862e-11	5.82621463896862e-11
45	PLI2	166	2016	14.8542957827804	6.66373783701013	2.38976800266191	3	350.501167446727	6	0	2.43	2.57	3.29	7.71	6	0.033384823609864	0.491874943691429	5.82621463896862e-11	5.82621463896862e-11
45	PLI2	167	2016	15.3212489630845	5.08266537179529	1.78219519996686	3	350.501167446727	6	0	2.43	2.57	3.29	7.71	6	0.033384823609864	0.491874943691429	5.82621463896862e-11	5.82621463896862e-11
45	PLI2	168	2016	14.9339061756269	5.93562415979851	2.77443700081817	3	350.501167446727	6	0	2.43	2.57	3.29	7.71	6	0.033384823609864	0.491874943691429	5.82621463896862e-11	5.82621463896862e-11
45	PLI2	169	2016	14.9125315483274	10.2591163969809	3.06828675321007	3	350.501167446727	6	0	2.43	2.57	3.29	7.71	6	0.033384823609864	0.491874943691429	5.82621463896862e-11	5.82621463896862e-11
45	PLI2	170	2016	14.6797899595723	0	2.42733226111111	3	350.501167446727	6	0	2.43	2.57	3.29	7.71	6	0.033384823609864	0.491874943691429	5.82621463896862e-11	5.82621463896862e-11
45	PLI2	171	2016	15.4292384979598	12.5673027873559	3.68541517677684	3	350.501167446727	6	0	2.43	2.57	3.29	7.71	6	0.033384823609864	0.491874943691429	5.82621463896862e-11	5.82621463896862e-11
45	PLI2	172	2016	17.5185732772328	6.81886990543732	2.72659769375885	3	350.501167446727	6	0	2.43	2.57	3.29	7.71	6	0.033384823609864	0.491874943691429	5.82621463896862e-11	5.82621463896862e-11
45	PLI2	173	2016	20.6304101903604	0	2.01256144276876	3	350.501167446727	6	0	2.43	2.57	3.29	7.71	6	0.033384823609864	0.491874943691429	5.82621463896862e-11	5.82621463896862e-11
45	PLI2	174	2016	24.7344422123086	26.7825009665555	3.12326382692196	3	350.501167446727	6	0	2.43	2.57	3.29	7.71	6	0.033384823609864	0.491874943691429	5.82621463896862e-11	5.82621463896862e-11
45	PLI2	175	2016	21.4679644902205	0.289650581303222	2.40303521437316	3	350.501167446727	6	0	2.43	2.57	3.29	7.71	6	0.033384823609864	0.491874943691429	5.82621463896862e-11	5.82621463896862e-11
45	PLI2	176	2016	16.2377607970172	20.2982519052779	2.64825195604043	3	350.501167446727	6	0	2.43	2.57	3.29	7.71	6	0.033384823609864	0.491874943691429	5.82621463896862e-11	5.82621463896862e-11
45	PLI2	177	2016	14.5209306695538	5.7055146111445	2.97512567750749	3	350.501167446727	6	0	2.43	2.57	3.29	7.71	6	0.033384823609864	0.491874943691429	5.82621463896862e-11	5.82621463896862e-11
45	PLI2	178	2016	14.7717930858462	3.58690531230305	3.23300435006203	3	350.501167446727	6	0	2.43	2.57	3.29	7.71	6	0.033384823609864	0.491874943691429	5.82621463896862e-11	5.82621463896862e-11
46	PLI2	179	2016	17.4576513918781	7.9111104421079	2.11839247303388	3	350.501167446727	6	0	2.43	2.57	3.29	7.71	6	0.033384823609864	0.491874943691429	5.82621463896862e-11	5.82621463896862e-11
46	PLI2	180	2016	16.9835119378026	0.138395192268411	3.84362241660812	3	350.501167446727	6	0	2.43	2.57	3.29	7.71	6	0.033384823609864	0.491874943691429	5.82621463896862e-11	5.82621463896862e-11
46	PLI2	181	2016	17.2994146309039	4.20198201980103	3.35552403192681	3	350.501167446727	6	0	2.43	2.57	3.29	7.71	6	0.033384823609864	0.491874943691429	5.82621463896862e-11	5.82621463896862e-11
46	PLI2	182	2016	18.6762783783337	8.0772489397568	4.00328511868641	3	350.501167446727	6	0	2.43	2.57	3.29	7.71	6	0.033384823609864	0.491874943691429	5.82621463896862e-11	5.82621463896862e-11
46	PLI2	183	2016	14.7899907144771	4.17993636663044	3.95101318563474	3	350.501167446727	6	0	2.43	2.57	3.29	7.71	6	0.033384823609864	0.491874943691429	5.82621463896862e-11	5.82621463896862e-11
46	PLI2	184	2016	14.9382180294845	2.67846123162622	3.0175627174866	3	350.501167446727	6	0	2.43	2.57	3.29	7.71	6	0.033384823609864	0.491874943691429	5.82621463896862e-11	5.82621463896862e-11
46	PLI2	185	2016	17.2163867902519	0	1.84613093904213	3	350.501167446727	6	0	2.43	2.57	3.29	7.71	6	0.033384823609864	0.491874943691429	5.82621463896862e-11	5.82621463896862e-11
46	PLI2	186	2016	16.4971628077045	0.198193864379201	3.99466283537002	3	350.501167446727	6	0	2.43	2.57	3.29	7.71	6	0.033384823609864	0.491874943691429	5.82621463896862e-11	5.82621463896862e-11
46	PLI2	187	2016	15.4929707680872	0	3.31911658545165	3	350.501167446727	6	0	2.43	2.57	3.29	7.71	6	0.033384823609864	0.491874943691429	5.82621463896862e-11	5.82621463896862e-11
46	PLI2	188	2016	16.6323197461312	0	1.66367544270167	3	350.501167446727	6	0	2.43	2.57	3.29	7.71	6	0.033384823609864	0.491874943691429	5.82621463896862e-11	5.82621463896862e-11
46	PLI2	189	2016	19.0492976250021	0.674444715012161	3.33257866812744	3	350.501167446727	6	0	2.43	2.57	3.29	7.71	6	0.033384823609864	0.491874943691429	5.82621463896862e-11	5.82621463896862e-11
46	PLI2	190	2016	19.9096691901297	0	2.98755105682495	3	350.501167446727	6	0	2.43	2.57	3.29	7.71	6	0.033384823609864	0.491874943691429	5.82621463896862e-11	5.82621463896862e-11
46	PLI2	191	2016	23.5474354255132	0	3.24649959373604	3	350.501167446727	6	0	2.43	2.57	3.29	7.71	6	0.033384823609864	0.491874943691429	5.82621463896862e-11	5.82621463896862e-11
46	PLI2	192	2016	19.8315831183444	0	4.0056188226778	3	350.501167446727	6	0	2.43	2.57	3.29	7.71	6	0.033384823609864	0.491874943691429	5.82621463896862e-11	5.82621463896862e-11
46	PLI2	193	2016	17.6822248893656	1.40910109671879	2.83958190840511	3	350.501167446727	6	0	2.43	2.57	3.29	7.71	6	0.033384823609864	0.491874943691429	5.82621463896862e-11	5.82621463896862e-11
46	PLI2	194	2016	15.0116686885657	1.39238301813608	2.53156526100411	3	350.501167446727	6	0	2.43	2.57	3.29	7.71	6	0.033384823609864	0.491874943691429	5.82621463896862e-11	5.82621463896862e-11
46	PLI2	195	2016	14.2713668411905	0.739026506528725	3.41256228414582	3	350.501167446727	6	0	2.43	2.57	3.29	7.71	6	0.033384823609864	0.491874943691429	5.82621463896862e-11	5.82621463896862e-11
46	PLI2	196	2016	16.0755669584203	0	3.10926557266097	3	350.501167446727	6	0	2.43	2.57	3.29	7.71	6	0.033384823609864	0.491874943691429	5.82621463896862e-11	5.82621463896862e-11
46	PLI2	197	2016	18.2225495591937	0	2.20949726205415	3	350.501167446727	6	0	2.43	2.57	3.29	7.71	6	0.033384823609864	0.491874943691429	5.82621463896862e-11	5.82621463896862e-11
47	PLI2	198	2016	19.8263285017815	0.38765617943181	2.74421102773408	3	350.501167446727	6	0	2.43	2.57	3.29	7.71	6	0.033384823609864	0.491874943691429	5.82621463896862e-11	5.82621463896862e-11
47	PLI2	199	2016	20.7413828163873	0	1.89299424199531	3	350.501167446727	6	0	2.43	2.57	3.29	7.71	6	0.033384823609864	0.491874943691429	5.82621463896862e-11	5.82621463896862e-11
47	PLI2	200	2016	23.5563472065832	0	1.58084554890774	3	350.501167446727	6	0	2.43	2.57	3.29	7.71	6	0.033384823609864	0.491874943691429	5.82621463896862e-11	5.82621463896862e-11
47	PLI2	201	2016	26.2843509779954	1.27502858055399	2.99479601399145	3	350.501167446727	6	0	2.43	2.57	3.29	7.71	6	0.033384823609864	0.491874943691429	5.82621463896862e-11	5.82621463896862e-11
47	PLI2	202	2016	23.7587387170388	0	2.34177589107072	3	350.501167446727	6	0	2.43	2.57	3.29	7.71	6	0.033384823609864	0.491874943691429	5.82621463896862e-11	5.82621463896862e-11
47	PLI2	203	2016	22.2620551388586	6.92420534401679	2.14793075878439	3	350.501167446727	6	0	2.43	2.57	3.29	7.71	6	0.033384823609864	0.491874943691429	5.82621463896862e-11	5.82621463896862e-11
47	PLI2	204	2016	21.3970655660896	0	1.74207247908291	3	350.501167446727	6	0	2.43	2.57	3.29	7.71	6	0.033384823609864	0.491874943691429	5.82621463896862e-11	5.82621463896862e-11
47	PLI2	205	2016	21.4756784017783	0	1.55333275278266	3	350.501167446727	6	0	2.43	2.57	3.29	7.71	6	0.033384823609864	0.491874943691429	5.82621463896862e-11	5.82621463896862e-11
47	PLI2	206	2016	21.4878087953708	0.0485459349138875	2.22856571743735	3	350.501167446727	6	0	2.43	2.57	3.29	7.71	6	0.033384823609864	0.491874943691429	5.82621463896862e-11	5.82621463896862e-11
47	PLI2	207	2016	20.1789398414597	0	1.55194780374574	3	350.501167446727	6	0	2.43	2.57	3.29	7.71	6	0.033384823609864	0.491874943691429	5.82621463896862e-11	5.82621463896862e-11
47	PLI2	208	2016	19.6179673720283	0.471675645030726	2.7422341533903	3	350.501167446727	6	0	2.43	2.57	3.29	7.71	6	0.033384823609864	0.491874943691429	5.82621463896862e-11	5.82621463896862e-11
47	PLI2	209	2016	19.827870310499	2.12391296960814	2.32869618101512	3	350.501167446727	6	0	2.43	2.57	3.29	7.71	6	0.033384823609864	0.491874943691429	5.82621463896862e-11	5.82621463896862e-11
47	PLI2	210	2016	18.935059919454	2.99415220545531	3.0178723872829	3	350.501167446727	6	0	2.43	2.57	3.29	7.71	6	0.033384823609864	0.491874943691429	5.82621463896862e-11	5.82621463896862e-11
47	PLI2	211	2016	18.1759625218323	1.18747079666017	2.42961471415264	3	350.501167446727	6	0	2.43	2.57	3.29	7.71	6	0.033384823609864	0.491874943691429	5.82621463896862e-11	5.82621463896862e-11
47	PLI2	212	2016	16.8522362039029	1.66030577524093	2.33618854090947	3	350.501167446727	6	0	2.43	2.57	3.29	7.71	6	0.033384823609864	0.491874943691429	5.82621463896862e-11	5.82621463896862e-11
47	PLI2	213	2016	16.1141942221731	6.27343427698299	2.24301297752194	3	350.501167446727	6	0	2.43	2.57	3.29	7.71	6	0.033384823609864	0.491874943691429	5.82621463896862e-11	5.82621463896862e-11
47	PLI2	214	2016	16.2133048656357	8.10184686888744	2.90453473375314	3	350.501167446727	6	0	2.43	2.57	3.29	7.71	6	0.033384823609864	0.491874943691429	5.82621463896862e-11	5.82621463896862e-11
47	PLI2	215	2016	18.4338628478592	12.6731103100869	4.08842108877628	3	350.501167446727	6	0	2.43	2.57	3.29	7.71	6	0.033384823609864	0.491874943691429	5.82621463896862e-11	5.82621463896862e-11
47	PLI2	216	2016	17.5343687177731	0.784472156140234	3.32705168152155	3	350.501167446727	6	0	2.43	2.57	3.29	7.71	6	0.033384823609864	0.491874943691429	5.82621463896862e-11	5.82621463896862e-11
47	PLI2	217	2016	17.1239067366597	0.708091480477225	2.67367723224476	3	350.501167446727	6	0	2.43	2.57	3.29	7.71	6	0.033384823609864	0.491874943691429	5.82621463896862e-11	5.82621463896862e-11
47	PLI2	218	2016	16.6297262056106	1.28634422368647	2.64187517730393	3	350.501167446727	6	0	2.43	2.57	3.29	7.71	6	0.033384823609864	0.491874943691429	5.82621463896862e-11	5.82621463896862e-11
47	PLI2	219	2016	19.1955821626272	0	2.98750083587054	3	350.501167446727	6	0	2.43	2.57	3.29	7.71	6	0.033384823609864	0.491874943691429	5.82621463896862e-11	5.82621463896862e-11
47	PLI2	220	2016	17.8065203466111	0.334967242152533	3.85086875685199	3	350.501167446727	6	0	2.43	2.57	3.29	7.71	6	0.033384823609864	0.491874943691429	5.82621463896862e-11	5.82621463896862e-11
47	PLI2	221	2016	14.607738188387	1.4534813829148	2.6184856495943	3	350.501167446727	6	0	2.43	2.57	3.29	7.71	6	0.033384823609864	0.491874943691429	5.82621463896862e-11	5.82621463896862e-11
47	PLI2	222	2016	12.9242761007312	1.97174566085657	2.38819134647583	3	350.501167446727	6	0	2.43	2.57	3.29	7.71	6	0.033384823609864	0.491874943691429	5.82621463896862e-11	5.82621463896862e-11
47	PLI2	223	2016	12.1175747379058	6.99608470866702	3.33192965094985	3	350.501167446727	6	0	2.43	2.57	3.29	7.71	6	0.033384823609864	0.491874943691429	5.82621463896862e-11	5.82621463896862e-11
47	PLI2	224	2016	18.362898006448	0.410967170703638	3.25132984810555	3	350.501167446727	6	0	2.43	2.57	3.29	7.71	6	0.033384823609864	0.491874943691429	5.82621463896862e-11	5.82621463896862e-11
47	PLI2	225	2016	18.3539347120474	0	3.28516278409926	3	350.501167446727	6	0	2.43	2.57	3.29	7.71	6	0.033384823609864	0.491874943691429	5.82621463896862e-11	5.82621463896862e-11
48	PLI2	226	2016	18.043642560559	0	1.866067561191	3	350.501167446727	6	0	2.43	2.57	3.29	7.71	6	0.033384823609864	0.491874943691429	5.82621463896862e-11	5.82621463896862e-11
48	PLI2	227	2016	17.559245609096	0	2.18183601041271	3	350.501167446727	6	0	2.43	2.57	3.29	7.71	6	0.033384823609864	0.491874943691429	5.82621463896862e-11	5.82621463896862e-11
48	PLI2	228	2016	17.4502830762503	0	2.23327895943485	3	350.501167446727	6	0	2.43	2.57	3.29	7.71	6	0.033384823609864	0.491874943691429	5.82621463896862e-11	5.82621463896862e-11
48	PLI2	229	2016	18.3325178656943	0	2.29504047985797	3	350.501167446727	6	0	2.43	2.57	3.29	7.71	6	0.033384823609864	0.491874943691429	5.82621463896862e-11	5.82621463896862e-11
48	PLI2	230	2016	18.6481412408667	0	1.81948112774896	3	350.501167446727	6	0	2.43	2.57	3.29	7.71	6	0.033384823609864	0.491874943691429	5.82621463896862e-11	5.82621463896862e-11
48	PLI2	231	2016	19.6388581254174	0.896453594870606	1.97335155616972	3	350.501167446727	6	0	2.43	2.57	3.29	7.71	6	0.033384823609864	0.491874943691429	5.82621463896862e-11	5.82621463896862e-11
48	PLI2	232	2016	19.4490478185121	0.513745380230789	3.30091244894428	3	350.501167446727	6	0	2.43	2.57	3.29	7.71	6	0.033384823609864	0.491874943691429	5.82621463896862e-11	5.82621463896862e-11
48	PLI2	233	2016	16.7000668260452	4.61425111617038	4.06321688550234	3	350.501167446727	6	0	2.43	2.57	3.29	7.71	6	0.033384823609864	0.491874943691429	5.82621463896862e-11	5.82621463896862e-11
48	PLI2	234	2016	17.0578739772015	0.572766145874148	2.94564673222754	3	350.501167446727	6	0	2.43	2.57	3.29	7.71	6	0.033384823609864	0.491874943691429	5.82621463896862e-11	5.82621463896862e-11
48	PLI2	235	2016	21.1081903345895	0	1.76519577615207	3	350.501167446727	6	0	2.43	2.57	3.29	7.71	6	0.033384823609864	0.491874943691429	5.82621463896862e-11	5.82621463896862e-11
48	PLI2	236	2016	24.6508309992918	0	2.73202340113721	3	350.501167446727	6	0	2.43	2.57	3.29	7.71	6	0.033384823609864	0.491874943691429	5.82621463896862e-11	5.82621463896862e-11
48	PLI2	237	2016	26.2574233965349	0	3.03465511163971	3	350.501167446727	6	0	2.43	2.57	3.29	7.71	6	0.033384823609864	0.491874943691429	5.82621463896862e-11	5.82621463896862e-11
48	PLI2	238	2016	25.4413400135537	0	2.25725737722667	3	350.501167446727	6	0	2.43	2.57	3.29	7.71	6	0.033384823609864	0.491874943691429	5.82621463896862e-11	5.82621463896862e-11
48	PLI2	239	2016	24.316701270345	1.66049009502986	2.3884907667869	3	350.501167446727	6	0	2.43	2.57	3.29	7.71	6	0.033384823609864	0.491874943691429	5.82621463896862e-11	5.82621463896862e-11
48	PLI2	240	2016	23.3168544180388	0.366158351712	3.38844620645144	3	350.501167446727	6	0	2.43	2.57	3.29	7.71	6	0.033384823609864	0.491874943691429	5.82621463896862e-11	5.82621463896862e-11
48	PLI2	241	2016	18.064539052866	0.581140585021193	2.56414395707946	3	350.501167446727	6	0	2.43	2.57	3.29	7.71	6	0.033384823609864	0.491874943691429	5.82621463896862e-11	5.82621463896862e-11
48	PLI2	242	2016	17.508120108584	0	1.54916611618349	3	350.501167446727	6	0	2.43	2.57	3.29	7.71	6	0.033384823609864	0.491874943691429	5.82621463896862e-11	5.82621463896862e-11
48	PLI2	243	2016	19.0967092866313	0	1.94669596368696	3	350.501167446727	6	0	2.43	2.57	3.29	7.71	6	0.033384823609864	0.491874943691429	5.82621463896862e-11	5.82621463896862e-11
48	PLI2	244	2016	18.196792675429	0	2.02903454991609	3	350.501167446727	6	0	2.43	2.57	3.29	7.71	6	0.033384823609864	0.491874943691429	5.82621463896862e-11	5.82621463896862e-11
48	PLI2	245	2016	18.2712594098226	0.0662853706643267	2.15812666874658	3	350.501167446727	6	0	2.43	2.57	3.29	7.71	6	0.033384823609864	0.491874943691429	5.82621463896862e-11	5.82621463896862e-11
48	PLI2	246	2016	18.533611516426	0.528908374483631	2.34653046144922	3	350.501167446727	6	0	2.43	2.57	3.29	7.71	6	0.033384823609864	0.491874943691429	5.82621463896862e-11	5.82621463896862e-11
48	PLI2	247	2016	18.3411544714868	11.1159128982311	4.45248894350974	3	350.501167446727	6	0	2.43	2.57	3.29	7.71	6	0.033384823609864	0.491874943691429	5.82621463896862e-11	5.82621463896862e-11
48	PLI2	248	2016	17.4561144201795	0	2.97612195781676	3	350.501167446727	6	0	2.43	2.57	3.29	7.71	6	0.033384823609864	0.491874943691429	5.82621463896862e-11	5.82621463896862e-11
48	PLI2	249	2016	18.6622456959047	0	1.51708944756336	3	350.501167446727	6	0	2.43	2.57	3.29	7.71	6	0.033384823609864	0.491874943691429	5.82621463896862e-11	5.82621463896862e-11
49	PLI2	250	2016	20.010455736629	0	2.09728145792872	3	350.501167446727	6	0	2.43	2.57	3.29	7.71	6	0.033384823609864	0.491874943691429	5.82621463896862e-11	5.82621463896862e-11
49	PLI2	251	2016	21.5935390302265	0	2.80921349463391	3	350.501167446727	6	0	2.43	2.57	3.29	7.71	6	0.033384823609864	0.491874943691429	5.82621463896862e-11	5.82621463896862e-11
49	PLI2	252	2016	18.1718116033171	0	1.79209246437963	3	350.501167446727	6	0	2.43	2.57	3.29	7.71	6	0.033384823609864	0.491874943691429	5.82621463896862e-11	5.82621463896862e-11
49	PLI2	253	2016	18.5589490953204	0	1.50009993400254	3	350.501167446727	6	0	2.43	2.57	3.29	7.71	6	0.033384823609864	0.491874943691429	5.82621463896862e-11	5.82621463896862e-11
49	PLI2	254	2016	19.618340755171	0	1.38095508951608	3	350.501167446727	6	0	2.43	2.57	3.29	7.71	6	0.033384823609864	0.491874943691429	5.82621463896862e-11	5.82621463896862e-11
49	PLI2	255	2016	22.4220810705638	0	1.63807691738217	3	350.501167446727	6	0	2.43	2.57	3.29	7.71	6	0.033384823609864	0.491874943691429	5.82621463896862e-11	5.82621463896862e-11
49	PLI2	256	2016	24.6771611082113	0	2.12323820801912	3	350.501167446727	6	0	2.43	2.57	3.29	7.71	6	0.033384823609864	0.491874943691429	5.82621463896862e-11	5.82621463896862e-11
49	PLI2	257	2016	25.1622613741383	0	2.38351298352181	3	350.501167446727	6	0	2.43	2.57	3.29	7.71	6	0.033384823609864	0.491874943691429	5.82621463896862e-11	5.82621463896862e-11
49	PLI2	258	2016	23.6526232422559	5.16722022485167	3.20681239484266	3	350.501167446727	6	0	2.43	2.57	3.29	7.71	6	0.033384823609864	0.491874943691429	5.82621463896862e-11	5.82621463896862e-11
49	PLI2	259	2016	18.2458050022962	0	2.56069458417174	3	350.501167446727	6	0	2.43	2.57	3.29	7.71	6	0.033384823609864	0.491874943691429	5.82621463896862e-11	5.82621463896862e-11
49	PLI2	260	2016	17.2146132577259	0.0156955104800498	2.12089472126163	3	350.501167446727	6	0	2.43	2.57	3.29	7.71	6	0.033384823609864	0.491874943691429	5.82621463896862e-11	5.82621463896862e-11
49	PLI2	261	2016	16.6901837231944	0	3.07736085679172	3	350.501167446727	6	0	2.43	2.57	3.29	7.71	6	0.033384823609864	0.491874943691429	5.82621463896862e-11	5.82621463896862e-11
49	PLI2	262	2016	14.8789989707306	0	1.79595024200113	3	350.501167446727	6	0	2.43	2.57	3.29	7.71	6	0.033384823609864	0.491874943691429	5.82621463896862e-11	5.82621463896862e-11
49	PLI2	263	2016	14.9447422280089	0	1.1693650559919	3	350.501167446727	6	0	2.43	2.57	3.29	7.71	6	0.033384823609864	0.491874943691429	5.82621463896862e-11	5.82621463896862e-11
49	PLI2	264	2016	15.7602780561857	0	1.67215138452956	3	350.501167446727	6	0	2.43	2.57	3.29	7.71	6	0.033384823609864	0.491874943691429	5.82621463896862e-11	5.82621463896862e-11
49	PLI2	265	2016	14.7659844927558	0	1.51348229511997	3	350.501167446727	6	0	2.43	2.57	3.29	7.71	6	0.033384823609864	0.491874943691429	5.82621463896862e-11	5.82621463896862e-11
49	PLI2	266	2016	14.894216794141	0.125042310476888	1.69555007787918	3	350.501167446727	6	0	2.43	2.57	3.29	7.71	6	0.033384823609864	0.491874943691429	5.82621463896862e-11	5.82621463896862e-11
49	PLI2	267	2016	16.5570775080253	0	2.16783116416851	3	350.501167446727	6	0	2.43	2.57	3.29	7.71	6	0.033384823609864	0.491874943691429	5.82621463896862e-11	5.82621463896862e-11
49	PLI2	268	2016	18.4321423401762	0	3.23519725431918	3	350.501167446727	6	0	2.43	2.57	3.29	7.71	6	0.033384823609864	0.491874943691429	5.82621463896862e-11	5.82621463896862e-11
49	PLI2	269	2016	14.8262475554277	0	1.59341103693134	3	350.501167446727	6	0	2.43	2.57	3.29	7.71	6	0.033384823609864	0.491874943691429	5.82621463896862e-11	5.82621463896862e-11
49	PLI2	270	2016	14.4539830061634	0	1.43347714937885	3	350.501167446727	6	0	2.43	2.57	3.29	7.71	6	0.033384823609864	0.491874943691429	5.82621463896862e-11	5.82621463896862e-11
49	PLI2	271	2016	18.3265100252859	0	4.23188506369507	3	350.501167446727	6	0	2.43	2.57	3.29	7.71	6	0.033384823609864	0.491874943691429	5.82621463896862e-11	5.82621463896862e-11
49	PLI2	272	2016	17.9605251742409	2.0806986614281	5.36139534508473	3	350.501167446727	6	0	2.43	2.57	3.29	7.71	6	0.033384823609864	0.491874943691429	5.82621463896862e-11	5.82621463896862e-11
49	PLI2	273	2016	14.6908568971431	0.0477000476933429	2.83489252014279	3	350.501167446727	6	0	2.43	2.57	3.29	7.71	6	0.033384823609864	0.491874943691429	5.82621463896862e-11	5.82621463896862e-11
49	PLI2	274	2016	14.1369070009556	5.0034700664951	2.13581595117184	3	350.501167446727	6	0	2.43	2.57	3.29	7.71	6	0.033384823609864	0.491874943691429	5.82621463896862e-11	5.82621463896862e-11
50	PLI2	275	2016	12.1805667055164	1.76793185230705	4.19060112918978	3	350.501167446727	6	0	2.43	2.57	3.29	7.71	6	0.033384823609864	0.491874943691429	5.82621463896862e-11	5.82621463896862e-11
50	PLI2	276	2016	13.7375008952273	4.38971027939205	2.70603119256934	3	350.501167446727	6	0	2.43	2.57	3.29	7.71	6	0.033384823609864	0.491874943691429	5.82621463896862e-11	5.82621463896862e-11
50	PLI2	277	2016	13.1889729975955	0	3.01088592018013	3	350.501167446727	6	0	2.43	2.57	3.29	7.71	6	0.033384823609864	0.491874943691429	5.82621463896862e-11	5.82621463896862e-11
50	PLI2	278	2016	10.0810940246206	0	3.87312421382178	3	350.501167446727	6	0	2.43	2.57	3.29	7.71	6	0.033384823609864	0.491874943691429	5.82621463896862e-11	5.82621463896862e-11
50	PLI2	279	2016	9.22272893997112	0	3.2660969141433	3	350.501167446727	6	0	2.43	2.57	3.29	7.71	6	0.033384823609864	0.491874943691429	5.82621463896862e-11	5.82621463896862e-11
50	PLI2	280	2016	11.9261983116808	0.00579738171259225	2.73906608626997	3	350.501167446727	6	0	2.43	2.57	3.29	7.71	6	0.033384823609864	0.491874943691429	5.82621463896862e-11	5.82621463896862e-11
50	PLI2	281	2016	10.4381893134773	0	2.2605253211223	3	350.501167446727	6	0	2.43	2.57	3.29	7.71	6	0.033384823609864	0.491874943691429	5.82621463896862e-11	5.82621463896862e-11
50	PLI2	282	2016	8.99828831163924	0.0317402373531994	1.39138962988444	3	350.501167446727	6	0	2.43	2.57	3.29	7.71	6	0.033384823609864	0.491874943691429	5.82621463896862e-11	5.82621463896862e-11
50	PLI2	283	2016	8.10229982025496	0	1.16297745272953	3	350.501167446727	6	0	2.43	2.57	3.29	7.71	6	0.033384823609864	0.491874943691429	5.82621463896862e-11	5.82621463896862e-11
50	PLI2	284	2016	7.74579256990901	0.822223916177524	1.56718582294949	3	350.501167446727	6	0	2.43	2.57	3.29	7.71	6	0.033384823609864	0.491874943691429	5.82621463896862e-11	5.82621463896862e-11
50	PLI2	285	2016	8.7550310386796	0	2.77030585592757	3	350.501167446727	6	0	2.43	2.57	3.29	7.71	6	0.033384823609864	0.491874943691429	5.82621463896862e-11	5.82621463896862e-11
50	PLI2	286	2016	9.1146261502156	0	4.44154123082316	3	350.501167446727	6	0	2.43	2.57	3.29	7.71	6	0.033384823609864	0.491874943691429	5.82621463896862e-11	5.82621463896862e-11
50	PLI2	287	2016	10.4433699601372	1.08283373781354	3.73446483629266	3	350.501167446727	6	0	2.43	2.57	3.29	7.71	6	0.033384823609864	0.491874943691429	5.82621463896862e-11	5.82621463896862e-11
50	PLI2	288	2016	11.0517904112333	0.340199673773661	2.9788100610291	3	350.501167446727	6	0	2.43	2.57	3.29	7.71	6	0.033384823609864	0.491874943691429	5.82621463896862e-11	5.82621463896862e-11
50	PLI2	289	2016	12.9176588025847	0	2.57814582054234	3	350.501167446727	6	0	2.43	2.57	3.29	7.71	6	0.033384823609864	0.491874943691429	5.82621463896862e-11	5.82621463896862e-11
50	PLI2	290	2016	12.4793928843657	0	2.20374192092888	3	350.501167446727	6	0	2.43	2.57	3.29	7.71	6	0.033384823609864	0.491874943691429	5.82621463896862e-11	5.82621463896862e-11
50	PLI2	291	2016	10.6955497900276	8.35032252473364	3.16188796539093	3	350.501167446727	6	0	2.43	2.57	3.29	7.71	6	0.033384823609864	0.491874943691429	5.82621463896862e-11	5.82621463896862e-11
50	PLI2	292	2016	8.34918375213822	16.6528735013105	4.31023674167116	3	350.501167446727	6	0	2.43	2.57	3.29	7.71	6	0.033384823609864	0.491874943691429	5.82621463896862e-11	5.82621463896862e-11
50	PLI2	293	2016	7.78973540132054	3.11390698594735	1.83120171529413	3	350.501167446727	6	0	2.43	2.57	3.29	7.71	6	0.033384823609864	0.491874943691429	5.82621463896862e-11	5.82621463896862e-11
50	PLI2	294	2016	7.90034490763978	4.15975881649752	2.29397709103743	3	350.501167446727	6	0	2.43	2.57	3.29	7.71	6	0.033384823609864	0.491874943691429	5.82621463896862e-11	5.82621463896862e-11
50	PLI2	295	2016	7.58168155859717	0	1.73597017248568	3	350.501167446727	6	0	2.43	2.57	3.29	7.71	6	0.033384823609864	0.491874943691429	5.82621463896862e-11	5.82621463896862e-11
50	PLI2	296	2016	5.24822227855522	0	1.73354254997411	3	350.501167446727	6	0	2.43	2.57	3.29	7.71	6	0.033384823609864	0.491874943691429	5.82621463896862e-11	5.82621463896862e-11
50	PLI2	297	2016	7.95506308964728	4.49672569722294	1.80304191674033	3	350.501167446727	6	0	2.43	2.57	3.29	7.71	6	0.033384823609864	0.491874943691429	5.82621463896862e-11	5.82621463896862e-11
50	PLI2	298	2016	9.03812025987888	0	1.61997283607548	3	350.501167446727	6	0	2.43	2.57	3.29	7.71	6	0.033384823609864	0.491874943691429	5.82621463896862e-11	5.82621463896862e-11
50	PLI2	299	2016	9.64876340120586	0.178151653160336	1.13333273958778	3	350.501167446727	6	0	2.43	2.57	3.29	7.71	6	0.033384823609864	0.491874943691429	5.82621463896862e-11	5.82621463896862e-11
51	SOL1	125	2016	12.1783178371434	0	3.55063278471138	6	266.712898825518	20	0	3.63	4.54	3.92	7.21	4.38	0.575494270050872	0.464033389056906	0.0207778093612584	5.82621463896862e-11
51	SOL1	126	2016	16.7454438994436	0	3.65391047236506	6	266.712898825518	20	0	3.63	4.54	3.92	7.21	4.38	0.575494270050872	0.464033389056906	0.0207778093612584	5.82621463896862e-11
51	SOL1	127	2016	18.3458712189204	0	3.33442394104347	6	266.712898825518	20	0	3.63	4.54	3.92	7.21	4.38	0.575494270050872	0.464033389056906	0.0207778093612584	5.82621463896862e-11
51	SOL1	128	2016	18.9874378764373	0	4.67706769956403	6	266.712898825518	20	0	3.63	4.54	3.92	7.21	4.38	0.575494270050872	0.464033389056906	0.0207778093612584	5.82621463896862e-11
51	SOL1	129	2016	18.8901560630569	0	4.38978916642893	6	266.712898825518	20	0	3.63	4.54	3.92	7.21	4.38	0.575494270050872	0.464033389056906	0.0207778093612584	5.82621463896862e-11
51	SOL1	130	2016	17.1558949562509	0.268076762460259	2.96925135024609	6	266.712898825518	20	0	3.63	4.54	3.92	7.21	4.38	0.575494270050872	0.464033389056906	0.0207778093612584	5.82621463896862e-11
51	SOL1	131	2016	18.7152531909182	0	3.40851327314877	6	266.712898825518	20	0	3.63	4.54	3.92	7.21	4.38	0.575494270050872	0.464033389056906	0.0207778093612584	5.82621463896862e-11
51	SOL1	132	2016	17.223493086883	0	3.63647090439089	6	266.712898825518	20	0	3.63	4.54	3.92	7.21	4.38	0.575494270050872	0.464033389056906	0.0207778093612584	5.82621463896862e-11
51	SOL1	133	2016	16.8018295971464	0	3.36827175658673	6	266.712898825518	20	0	3.63	4.54	3.92	7.21	4.38	0.575494270050872	0.464033389056906	0.0207778093612584	5.82621463896862e-11
51	SOL1	134	2016	8.83373418430513	0	4.90759549610682	6	266.712898825518	20	0	3.63	4.54	3.92	7.21	4.38	0.575494270050872	0.464033389056906	0.0207778093612584	5.82621463896862e-11
51	SOL1	135	2016	7.89223942488748	0.317937100545211	4.29158271606166	6	266.712898825518	20	0	3.63	4.54	3.92	7.21	4.38	0.575494270050872	0.464033389056906	0.0207778093612584	5.82621463896862e-11
51	SOL1	136	2016	8.9310395012087	0	3.01534692497302	6	266.712898825518	20	0	3.63	4.54	3.92	7.21	4.38	0.575494270050872	0.464033389056906	0.0207778093612584	5.82621463896862e-11
51	SOL1	137	2016	12.7271584072916	0	3.00598386346337	6	266.712898825518	20	0	3.63	4.54	3.92	7.21	4.38	0.575494270050872	0.464033389056906	0.0207778093612584	5.82621463896862e-11
51	SOL1	138	2016	14.0238936109012	1.07229713628452	3.00314489967582	6	266.712898825518	20	0	3.63	4.54	3.92	7.21	4.38	0.575494270050872	0.464033389056906	0.0207778093612584	5.82621463896862e-11
51	SOL1	139	2016	13.2794031961185	0	2.27031284950128	6	266.712898825518	20	0	3.63	4.54	3.92	7.21	4.38	0.575494270050872	0.464033389056906	0.0207778093612584	5.82621463896862e-11
52	SOL1	140	2016	14.0310840806469	0	3.56776859937158	6	266.712898825518	20	0	3.63	4.54	3.92	7.21	4.38	0.575494270050872	0.464033389056906	0.0207778093612584	5.82621463896862e-11
52	SOL1	141	2016	18.4529828642281	0	3.46840127406721	6	266.712898825518	20	0	3.63	4.54	3.92	7.21	4.38	0.575494270050872	0.464033389056906	0.0207778093612584	5.82621463896862e-11
52	SOL1	142	2016	17.0877098021755	4.19632013209827	3.68201613000166	6	266.712898825518	20	0	3.63	4.54	3.92	7.21	4.38	0.575494270050872	0.464033389056906	0.0207778093612584	5.82621463896862e-11
52	SOL1	143	2016	11.3640487759754	9.33439061467018	4.211758494847	6	266.712898825518	20	0	3.63	4.54	3.92	7.21	4.38	0.575494270050872	0.464033389056906	0.0207778093612584	5.82621463896862e-11
52	SOL1	144	2016	10.3172515202635	0	3.58273325761122	6	266.712898825518	20	0	3.63	4.54	3.92	7.21	4.38	0.575494270050872	0.464033389056906	0.0207778093612584	5.82621463896862e-11
52	SOL1	145	2016	11.8659269665929	0	1.52254086376898	6	266.712898825518	20	0	3.63	4.54	3.92	7.21	4.38	0.575494270050872	0.464033389056906	0.0207778093612584	5.82621463896862e-11
52	SOL1	146	2016	15.6766478059901	0.337534909202936	1.72440748763714	6	266.712898825518	20	0	3.63	4.54	3.92	7.21	4.38	0.575494270050872	0.464033389056906	0.0207778093612584	5.82621463896862e-11
52	SOL1	147	2016	16.8539100891586	9.15190703770001	2.14792001912745	6	266.712898825518	20	0	3.63	4.54	3.92	7.21	4.38	0.575494270050872	0.464033389056906	0.0207778093612584	5.82621463896862e-11
52	SOL1	148	2016	16.9743245869798	0.385554841909382	1.77519789739461	6	266.712898825518	20	0	3.63	4.54	3.92	7.21	4.38	0.575494270050872	0.464033389056906	0.0207778093612584	5.82621463896862e-11
52	SOL1	149	2016	16.4256340692577	15.8794890637464	2.60596736746716	6	266.712898825518	20	0	3.63	4.54	3.92	7.21	4.38	0.575494270050872	0.464033389056906	0.0207778093612584	5.82621463896862e-11
52	SOL1	150	2016	16.1403228210764	14.9044265105195	3.5239965541589	6	266.712898825518	20	0	3.63	4.54	3.92	7.21	4.38	0.575494270050872	0.464033389056906	0.0207778093612584	5.82621463896862e-11
52	SOL1	151	2016	16.3079036020599	0.10920381421408	2.89778820429705	6	266.712898825518	20	0	3.63	4.54	3.92	7.21	4.38	0.575494270050872	0.464033389056906	0.0207778093612584	5.82621463896862e-11
52	SOL1	152	2016	15.3921121774021	23.0666853584942	2.51590591988728	6	266.712898825518	20	0	3.63	4.54	3.92	7.21	4.38	0.575494270050872	0.464033389056906	0.0207778093612584	5.82621463896862e-11
53	SOL1	153	2016	17.8784125629038	14.4438965814383	2.34697432373531	6	266.712898825518	20	0	3.63	4.54	3.92	7.21	4.38	0.575494270050872	0.464033389056906	0.0207778093612584	5.82621463896862e-11
53	SOL1	154	2016	17.0145019134275	9.79307665622858	2.05326940937596	6	266.712898825518	20	0	3.63	4.54	3.92	7.21	4.38	0.575494270050872	0.464033389056906	0.0207778093612584	5.82621463896862e-11
53	SOL1	155	2016	16.7633786198365	0.292890215587837	2.2804553000584	6	266.712898825518	20	0	3.63	4.54	3.92	7.21	4.38	0.575494270050872	0.464033389056906	0.0207778093612584	5.82621463896862e-11
53	SOL1	156	2016	18.5414652887963	2.72298736660905	2.08222647880253	6	266.712898825518	20	0	3.63	4.54	3.92	7.21	4.38	0.575494270050872	0.464033389056906	0.0207778093612584	5.82621463896862e-11
53	SOL1	157	2016	19.5090799832502	0.0453718828010408	2.06130037102072	6	266.712898825518	20	0	3.63	4.54	3.92	7.21	4.38	0.575494270050872	0.464033389056906	0.0207778093612584	5.82621463896862e-11
53	SOL1	158	2016	19.2232605266039	3.78166330453952	1.89206845319776	6	266.712898825518	20	0	3.63	4.54	3.92	7.21	4.38	0.575494270050872	0.464033389056906	0.0207778093612584	5.82621463896862e-11
53	SOL1	159	2016	17.9019369222545	0.044597750410605	2.81022211293002	6	266.712898825518	20	0	3.63	4.54	3.92	7.21	4.38	0.575494270050872	0.464033389056906	0.0207778093612584	5.82621463896862e-11
53	SOL1	160	2016	15.1169558487548	0	2.7377866866558	6	266.712898825518	20	0	3.63	4.54	3.92	7.21	4.38	0.575494270050872	0.464033389056906	0.0207778093612584	5.82621463896862e-11
53	SOL1	161	2016	15.4361355379824	0	2.04168542900694	6	266.712898825518	20	0	3.63	4.54	3.92	7.21	4.38	0.575494270050872	0.464033389056906	0.0207778093612584	5.82621463896862e-11
53	SOL1	162	2016	17.0826246295247	0	1.74009833515316	6	266.712898825518	20	0	3.63	4.54	3.92	7.21	4.38	0.575494270050872	0.464033389056906	0.0207778093612584	5.82621463896862e-11
53	SOL1	163	2016	16.1413311552115	5.78488036850117	1.85206424544476	6	266.712898825518	20	0	3.63	4.54	3.92	7.21	4.38	0.575494270050872	0.464033389056906	0.0207778093612584	5.82621463896862e-11
53	SOL1	164	2016	15.7358054881177	6.0821845142431	2.74122793463564	6	266.712898825518	20	0	3.63	4.54	3.92	7.21	4.38	0.575494270050872	0.464033389056906	0.0207778093612584	5.82621463896862e-11
53	SOL1	165	2016	15.2200154927542	2.62729309412327	2.9123749949939	6	266.712898825518	20	0	3.63	4.54	3.92	7.21	4.38	0.575494270050872	0.464033389056906	0.0207778093612584	5.82621463896862e-11
54	SOL1	166	2016	14.5158698318449	1.6204939142677	2.61268594134206	6	266.712898825518	20	0	3.63	4.54	3.92	7.21	4.38	0.575494270050872	0.464033389056906	0.0207778093612584	5.82621463896862e-11
54	SOL1	167	2016	13.6526753064527	6.09243434917748	1.9532485902091	6	266.712898825518	20	0	3.63	4.54	3.92	7.21	4.38	0.575494270050872	0.464033389056906	0.0207778093612584	5.82621463896862e-11
54	SOL1	168	2016	14.1370461086526	5.69830976124559	2.95995720485793	6	266.712898825518	20	0	3.63	4.54	3.92	7.21	4.38	0.575494270050872	0.464033389056906	0.0207778093612584	5.82621463896862e-11
54	SOL1	169	2016	14.1732856069646	2.95991635170483	3.25497792817977	6	266.712898825518	20	0	3.63	4.54	3.92	7.21	4.38	0.575494270050872	0.464033389056906	0.0207778093612584	5.82621463896862e-11
54	SOL1	170	2016	13.3212972952517	0	2.56919789700552	6	266.712898825518	20	0	3.63	4.54	3.92	7.21	4.38	0.575494270050872	0.464033389056906	0.0207778093612584	5.82621463896862e-11
54	SOL1	171	2016	15.451695561209	6.84423539867946	3.83932679536963	6	266.712898825518	20	0	3.63	4.54	3.92	7.21	4.38	0.575494270050872	0.464033389056906	0.0207778093612584	5.82621463896862e-11
54	SOL1	172	2016	17.9677518538349	1.12708918992833	2.88787680028428	6	266.712898825518	20	0	3.63	4.54	3.92	7.21	4.38	0.575494270050872	0.464033389056906	0.0207778093612584	5.82621463896862e-11
54	SOL1	173	2016	20.615344889671	0	2.1296642353792	6	266.712898825518	20	0	3.63	4.54	3.92	7.21	4.38	0.575494270050872	0.464033389056906	0.0207778093612584	5.82621463896862e-11
54	SOL1	174	2016	25.3061930693942	0.678529123984901	3.31769994105819	6	266.712898825518	20	0	3.63	4.54	3.92	7.21	4.38	0.575494270050872	0.464033389056906	0.0207778093612584	5.82621463896862e-11
54	SOL1	175	2016	20.7786189842758	0.628012732118289	2.54153558118043	6	266.712898825518	20	0	3.63	4.54	3.92	7.21	4.38	0.575494270050872	0.464033389056906	0.0207778093612584	5.82621463896862e-11
54	SOL1	176	2016	15.4571767467473	14.7457041303474	2.82605832362763	6	266.712898825518	20	0	3.63	4.54	3.92	7.21	4.38	0.575494270050872	0.464033389056906	0.0207778093612584	5.82621463896862e-11
54	SOL1	177	2016	14.5925110758411	1.7987313053353	3.10032798056358	6	266.712898825518	20	0	3.63	4.54	3.92	7.21	4.38	0.575494270050872	0.464033389056906	0.0207778093612584	5.82621463896862e-11
54	SOL1	178	2016	15.4284398954369	0.0338445290616427	3.36943809455922	6	266.712898825518	20	0	3.63	4.54	3.92	7.21	4.38	0.575494270050872	0.464033389056906	0.0207778093612584	5.82621463896862e-11
55	SOL1	179	2016	17.9199266682939	0.911559040086898	2.30278058824399	6	266.712898825518	20	0	3.63	4.54	3.92	7.21	4.38	0.575494270050872	0.464033389056906	0.0207778093612584	5.82621463896862e-11
55	SOL1	180	2016	17.7766055301017	0.640677674765196	3.98643140286284	6	266.712898825518	20	0	3.63	4.54	3.92	7.21	4.38	0.575494270050872	0.464033389056906	0.0207778093612584	5.82621463896862e-11
55	SOL1	181	2016	17.7231928767259	3.42402957908151	3.51228012546835	6	266.712898825518	20	0	3.63	4.54	3.92	7.21	4.38	0.575494270050872	0.464033389056906	0.0207778093612584	5.82621463896862e-11
55	SOL1	182	2016	18.6834556921437	1.17990463437063	4.17319660040505	6	266.712898825518	20	0	3.63	4.54	3.92	7.21	4.38	0.575494270050872	0.464033389056906	0.0207778093612584	5.82621463896862e-11
55	SOL1	183	2016	14.5272255064435	0.593569358195448	4.07915931508494	6	266.712898825518	20	0	3.63	4.54	3.92	7.21	4.38	0.575494270050872	0.464033389056906	0.0207778093612584	5.82621463896862e-11
55	SOL1	184	2016	15.131265977112	0	3.14918328833369	6	266.712898825518	20	0	3.63	4.54	3.92	7.21	4.38	0.575494270050872	0.464033389056906	0.0207778093612584	5.82621463896862e-11
55	SOL1	185	2016	16.9505759288565	0	2.02560504293835	6	266.712898825518	20	0	3.63	4.54	3.92	7.21	4.38	0.575494270050872	0.464033389056906	0.0207778093612584	5.82621463896862e-11
55	SOL1	186	2016	17.2631307562647	0.252301400902216	4.07330727065938	6	266.712898825518	20	0	3.63	4.54	3.92	7.21	4.38	0.575494270050872	0.464033389056906	0.0207778093612584	5.82621463896862e-11
55	SOL1	187	2016	15.5176157641514	0	3.35341480911098	6	266.712898825518	20	0	3.63	4.54	3.92	7.21	4.38	0.575494270050872	0.464033389056906	0.0207778093612584	5.82621463896862e-11
55	SOL1	188	2016	17.1300731984824	0	1.77410726516836	6	266.712898825518	20	0	3.63	4.54	3.92	7.21	4.38	0.575494270050872	0.464033389056906	0.0207778093612584	5.82621463896862e-11
55	SOL1	189	2016	20.1948337574855	0	3.4640760079069	6	266.712898825518	20	0	3.63	4.54	3.92	7.21	4.38	0.575494270050872	0.464033389056906	0.0207778093612584	5.82621463896862e-11
55	SOL1	190	2016	20.445451178684	0	3.10086218039224	6	266.712898825518	20	0	3.63	4.54	3.92	7.21	4.38	0.575494270050872	0.464033389056906	0.0207778093612584	5.82621463896862e-11
55	SOL1	191	2016	24.1059085819872	0	3.39449523865107	6	266.712898825518	20	0	3.63	4.54	3.92	7.21	4.38	0.575494270050872	0.464033389056906	0.0207778093612584	5.82621463896862e-11
55	SOL1	192	2016	19.8515677506667	0	4.081231270422	6	266.712898825518	20	0	3.63	4.54	3.92	7.21	4.38	0.575494270050872	0.464033389056906	0.0207778093612584	5.82621463896862e-11
55	SOL1	193	2016	17.1558545566687	2.97791952868917	2.93266731172001	6	266.712898825518	20	0	3.63	4.54	3.92	7.21	4.38	0.575494270050872	0.464033389056906	0.0207778093612584	5.82621463896862e-11
55	SOL1	194	2016	13.9457119872266	2.59027893215065	2.68139275094587	6	266.712898825518	20	0	3.63	4.54	3.92	7.21	4.38	0.575494270050872	0.464033389056906	0.0207778093612584	5.82621463896862e-11
55	SOL1	195	2016	13.7809837719207	1.0023024557434	3.51998435202851	6	266.712898825518	20	0	3.63	4.54	3.92	7.21	4.38	0.575494270050872	0.464033389056906	0.0207778093612584	5.82621463896862e-11
55	SOL1	196	2016	15.4222237619652	0	3.2076515744949	6	266.712898825518	20	0	3.63	4.54	3.92	7.21	4.38	0.575494270050872	0.464033389056906	0.0207778093612584	5.82621463896862e-11
55	SOL1	197	2016	18.3876832582402	0	2.3030857012118	6	266.712898825518	20	0	3.63	4.54	3.92	7.21	4.38	0.575494270050872	0.464033389056906	0.0207778093612584	5.82621463896862e-11
55	SOL1	198	2016	21.3396677275268	0	2.83051102307859	6	266.712898825518	20	0	3.63	4.54	3.92	7.21	4.38	0.575494270050872	0.464033389056906	0.0207778093612584	5.82621463896862e-11
55	SOL1	199	2016	21.941666447229	0	1.98003111909986	6	266.712898825518	20	0	3.63	4.54	3.92	7.21	4.38	0.575494270050872	0.464033389056906	0.0207778093612584	5.82621463896862e-11
55	SOL1	200	2016	23.8004267868356	0	1.77577586887266	6	266.712898825518	20	0	3.63	4.54	3.92	7.21	4.38	0.575494270050872	0.464033389056906	0.0207778093612584	5.82621463896862e-11
55	SOL1	201	2016	26.5745575024029	0	3.17018730963732	6	266.712898825518	20	0	3.63	4.54	3.92	7.21	4.38	0.575494270050872	0.464033389056906	0.0207778093612584	5.82621463896862e-11
55	SOL1	202	2016	23.431096481879	1.37022660042692	2.56481518908179	6	266.712898825518	20	0	3.63	4.54	3.92	7.21	4.38	0.575494270050872	0.464033389056906	0.0207778093612584	5.82621463896862e-11
55	SOL1	203	2016	21.9971629287345	2.1033973090298	2.29069398191986	6	266.712898825518	20	0	3.63	4.54	3.92	7.21	4.38	0.575494270050872	0.464033389056906	0.0207778093612584	5.82621463896862e-11
55	SOL1	204	2016	20.2925970598611	5.48454543366275	1.88416938309983	6	266.712898825518	20	0	3.63	4.54	3.92	7.21	4.38	0.575494270050872	0.464033389056906	0.0207778093612584	5.82621463896862e-11
55	SOL1	205	2016	21.5272394612306	0	1.76258076997521	6	266.712898825518	20	0	3.63	4.54	3.92	7.21	4.38	0.575494270050872	0.464033389056906	0.0207778093612584	5.82621463896862e-11
55	SOL1	206	2016	21.6298631372605	0	2.36308403958193	6	266.712898825518	20	0	3.63	4.54	3.92	7.21	4.38	0.575494270050872	0.464033389056906	0.0207778093612584	5.82621463896862e-11
55	SOL1	207	2016	18.6043636991177	0.646988815712154	1.73234538068355	6	266.712898825518	20	0	3.63	4.54	3.92	7.21	4.38	0.575494270050872	0.464033389056906	0.0207778093612584	5.82621463896862e-11
55	SOL1	208	2016	19.0366695742339	0.39689690193715	2.86175630402309	6	266.712898825518	20	0	3.63	4.54	3.92	7.21	4.38	0.575494270050872	0.464033389056906	0.0207778093612584	5.82621463896862e-11
55	SOL1	209	2016	19.0279873970467	8.59061216128866	2.51625954845206	6	266.712898825518	20	0	3.63	4.54	3.92	7.21	4.38	0.575494270050872	0.464033389056906	0.0207778093612584	5.82621463896862e-11
55	SOL1	210	2016	18.7138247715343	3.10077484113559	3.13959856106692	6	266.712898825518	20	0	3.63	4.54	3.92	7.21	4.38	0.575494270050872	0.464033389056906	0.0207778093612584	5.82621463896862e-11
55	SOL1	211	2016	19.1673570645699	0	2.57616596572951	6	266.712898825518	20	0	3.63	4.54	3.92	7.21	4.38	0.575494270050872	0.464033389056906	0.0207778093612584	5.82621463896862e-11
55	SOL1	212	2016	16.950351450007	1.11998284211656	2.49753041571553	6	266.712898825518	20	0	3.63	4.54	3.92	7.21	4.38	0.575494270050872	0.464033389056906	0.0207778093612584	5.82621463896862e-11
56	SOL1	213	2016	17.0601039251251	2.24545421704145	2.4115068675042	6	266.712898825518	20	0	3.63	4.54	3.92	7.21	4.38	0.575494270050872	0.464033389056906	0.0207778093612584	5.82621463896862e-11
56	SOL1	214	2016	16.4830328429818	6.9646608779341	3.13905427102915	6	266.712898825518	20	0	3.63	4.54	3.92	7.21	4.38	0.575494270050872	0.464033389056906	0.0207778093612584	5.82621463896862e-11
56	SOL1	215	2016	18.7746088246206	5.00616525704744	4.2196030935182	6	266.712898825518	20	0	3.63	4.54	3.92	7.21	4.38	0.575494270050872	0.464033389056906	0.0207778093612584	5.82621463896862e-11
56	SOL1	216	2016	17.3111592817616	0	3.37759352956654	6	266.712898825518	20	0	3.63	4.54	3.92	7.21	4.38	0.575494270050872	0.464033389056906	0.0207778093612584	5.82621463896862e-11
56	SOL1	217	2016	16.5305061175471	0.761334720781494	2.80181580606442	6	266.712898825518	20	0	3.63	4.54	3.92	7.21	4.38	0.575494270050872	0.464033389056906	0.0207778093612584	5.82621463896862e-11
56	SOL1	218	2016	17.9513691238844	0	2.77959974978212	6	266.712898825518	20	0	3.63	4.54	3.92	7.21	4.38	0.575494270050872	0.464033389056906	0.0207778093612584	5.82621463896862e-11
56	SOL1	219	2016	20.2515292123313	0	3.074518479142	6	266.712898825518	20	0	3.63	4.54	3.92	7.21	4.38	0.575494270050872	0.464033389056906	0.0207778093612584	5.82621463896862e-11
56	SOL1	220	2016	17.8658180543875	0.032821527573816	3.9234940869035	6	266.712898825518	20	0	3.63	4.54	3.92	7.21	4.38	0.575494270050872	0.464033389056906	0.0207778093612584	5.82621463896862e-11
56	SOL1	221	2016	14.52184045052	0.921349321359865	2.75562900006887	6	266.712898825518	20	0	3.63	4.54	3.92	7.21	4.38	0.575494270050872	0.464033389056906	0.0207778093612584	5.82621463896862e-11
56	SOL1	222	2016	12.0551611470704	5.53262962285707	2.51630636610726	6	266.712898825518	20	0	3.63	4.54	3.92	7.21	4.38	0.575494270050872	0.464033389056906	0.0207778093612584	5.82621463896862e-11
56	SOL1	223	2016	12.6192877458586	6.07517226626326	3.47077841617811	6	266.712898825518	20	0	3.63	4.54	3.92	7.21	4.38	0.575494270050872	0.464033389056906	0.0207778093612584	5.82621463896862e-11
56	SOL1	224	2016	18.3965942012595	0	3.37338992349479	6	266.712898825518	20	0	3.63	4.54	3.92	7.21	4.38	0.575494270050872	0.464033389056906	0.0207778093612584	5.82621463896862e-11
56	SOL1	225	2016	20.3315889450413	0	3.39768420824134	6	266.712898825518	20	0	3.63	4.54	3.92	7.21	4.38	0.575494270050872	0.464033389056906	0.0207778093612584	5.82621463896862e-11
56	SOL1	226	2016	18.4817438560159	0	2.02387404369585	6	266.712898825518	20	0	3.63	4.54	3.92	7.21	4.38	0.575494270050872	0.464033389056906	0.0207778093612584	5.82621463896862e-11
56	SOL1	227	2016	17.405953152388	0	2.35550505572062	6	266.712898825518	20	0	3.63	4.54	3.92	7.21	4.38	0.575494270050872	0.464033389056906	0.0207778093612584	5.82621463896862e-11
56	SOL1	228	2016	17.3617546726554	0	2.349314950294	6	266.712898825518	20	0	3.63	4.54	3.92	7.21	4.38	0.575494270050872	0.464033389056906	0.0207778093612584	5.82621463896862e-11
56	SOL1	229	2016	18.3437828809837	0	2.44603277204248	6	266.712898825518	20	0	3.63	4.54	3.92	7.21	4.38	0.575494270050872	0.464033389056906	0.0207778093612584	5.82621463896862e-11
56	SOL1	230	2016	18.4642258892018	0	1.98484086392057	6	266.712898825518	20	0	3.63	4.54	3.92	7.21	4.38	0.575494270050872	0.464033389056906	0.0207778093612584	5.82621463896862e-11
56	SOL1	231	2016	19.6051060183231	0.431555029909307	2.20009838926704	6	266.712898825518	20	0	3.63	4.54	3.92	7.21	4.38	0.575494270050872	0.464033389056906	0.0207778093612584	5.82621463896862e-11
56	SOL1	232	2016	19.1077316283102	0	3.4728307173757	6	266.712898825518	20	0	3.63	4.54	3.92	7.21	4.38	0.575494270050872	0.464033389056906	0.0207778093612584	5.82621463896862e-11
56	SOL1	233	2016	16.5330487048405	3.79510172266169	4.2329169970767	6	266.712898825518	20	0	3.63	4.54	3.92	7.21	4.38	0.575494270050872	0.464033389056906	0.0207778093612584	5.82621463896862e-11
56	SOL1	234	2016	18.053243447545	0.112815824962878	3.0946138850119	6	266.712898825518	20	0	3.63	4.54	3.92	7.21	4.38	0.575494270050872	0.464033389056906	0.0207778093612584	5.82621463896862e-11
56	SOL1	235	2016	22.3699930826273	0	1.92719126382676	6	266.712898825518	20	0	3.63	4.54	3.92	7.21	4.38	0.575494270050872	0.464033389056906	0.0207778093612584	5.82621463896862e-11
56	SOL1	236	2016	24.874495880427	0	2.96753670804033	6	266.712898825518	20	0	3.63	4.54	3.92	7.21	4.38	0.575494270050872	0.464033389056906	0.0207778093612584	5.82621463896862e-11
57	SOL1	237	2016	26.0406380127583	0	3.22403065303671	6	266.712898825518	20	0	3.63	4.54	3.92	7.21	4.38	0.575494270050872	0.464033389056906	0.0207778093612584	5.82621463896862e-11
57	SOL1	238	2016	26.7309788357107	0	2.36076914854375	6	266.712898825518	20	0	3.63	4.54	3.92	7.21	4.38	0.575494270050872	0.464033389056906	0.0207778093612584	5.82621463896862e-11
57	SOL1	239	2016	25.6660906030465	0.590609158740627	2.46796819280409	6	266.712898825518	20	0	3.63	4.54	3.92	7.21	4.38	0.575494270050872	0.464033389056906	0.0207778093612584	5.82621463896862e-11
57	SOL1	240	2016	25.2028510657578	0	3.53380536145161	6	266.712898825518	20	0	3.63	4.54	3.92	7.21	4.38	0.575494270050872	0.464033389056906	0.0207778093612584	5.82621463896862e-11
57	SOL1	241	2016	18.0241110096191	1.23168283481713	2.64808276261704	6	266.712898825518	20	0	3.63	4.54	3.92	7.21	4.38	0.575494270050872	0.464033389056906	0.0207778093612584	5.82621463896862e-11
57	SOL1	242	2016	17.3456250011342	0	1.76112255824634	6	266.712898825518	20	0	3.63	4.54	3.92	7.21	4.38	0.575494270050872	0.464033389056906	0.0207778093612584	5.82621463896862e-11
57	SOL1	243	2016	18.8370692844035	0	2.11689314172495	6	266.712898825518	20	0	3.63	4.54	3.92	7.21	4.38	0.575494270050872	0.464033389056906	0.0207778093612584	5.82621463896862e-11
57	SOL1	244	2016	19.0244838734403	0	2.18593288105381	6	266.712898825518	20	0	3.63	4.54	3.92	7.21	4.38	0.575494270050872	0.464033389056906	0.0207778093612584	5.82621463896862e-11
57	SOL1	245	2016	19.7859679474743	0	2.28894641936665	6	266.712898825518	20	0	3.63	4.54	3.92	7.21	4.38	0.575494270050872	0.464033389056906	0.0207778093612584	5.82621463896862e-11
57	SOL1	246	2016	20.358114605662	1.57883653385193	2.48228527827067	6	266.712898825518	20	0	3.63	4.54	3.92	7.21	4.38	0.575494270050872	0.464033389056906	0.0207778093612584	5.82621463896862e-11
57	SOL1	247	2016	18.6358721814658	4.73559603575553	4.60209691984535	6	266.712898825518	20	0	3.63	4.54	3.92	7.21	4.38	0.575494270050872	0.464033389056906	0.0207778093612584	5.82621463896862e-11
57	SOL1	248	2016	17.6972017753894	0	3.11531626845632	6	266.712898825518	20	0	3.63	4.54	3.92	7.21	4.38	0.575494270050872	0.464033389056906	0.0207778093612584	5.82621463896862e-11
57	SOL1	249	2016	18.901760515065	0	1.71765196490987	6	266.712898825518	20	0	3.63	4.54	3.92	7.21	4.38	0.575494270050872	0.464033389056906	0.0207778093612584	5.82621463896862e-11
57	SOL1	250	2016	19.3325882478971	0	2.30918320963303	6	266.712898825518	20	0	3.63	4.54	3.92	7.21	4.38	0.575494270050872	0.464033389056906	0.0207778093612584	5.82621463896862e-11
57	SOL1	251	2016	21.6074032797504	0	2.99235991323495	6	266.712898825518	20	0	3.63	4.54	3.92	7.21	4.38	0.575494270050872	0.464033389056906	0.0207778093612584	5.82621463896862e-11
57	SOL1	252	2016	17.9675408682218	0	1.94617649778123	6	266.712898825518	20	0	3.63	4.54	3.92	7.21	4.38	0.575494270050872	0.464033389056906	0.0207778093612584	5.82621463896862e-11
57	SOL1	253	2016	19.2025343577586	0	1.70113291841373	6	266.712898825518	20	0	3.63	4.54	3.92	7.21	4.38	0.575494270050872	0.464033389056906	0.0207778093612584	5.82621463896862e-11
57	SOL1	254	2016	19.982792927536	0	1.56004783309776	6	266.712898825518	20	0	3.63	4.54	3.92	7.21	4.38	0.575494270050872	0.464033389056906	0.0207778093612584	5.82621463896862e-11
57	SOL1	255	2016	22.1881130140556	0	1.86580966755868	6	266.712898825518	20	0	3.63	4.54	3.92	7.21	4.38	0.575494270050872	0.464033389056906	0.0207778093612584	5.82621463896862e-11
57	SOL1	256	2016	25.2400682422375	0	2.34592150656182	6	266.712898825518	20	0	3.63	4.54	3.92	7.21	4.38	0.575494270050872	0.464033389056906	0.0207778093612584	5.82621463896862e-11
57	SOL1	257	2016	24.2933090053208	0	2.58480935754066	6	266.712898825518	20	0	3.63	4.54	3.92	7.21	4.38	0.575494270050872	0.464033389056906	0.0207778093612584	5.82621463896862e-11
57	SOL1	258	2016	21.2373268942454	2.76793674261458	3.38049047479612	6	266.712898825518	20	0	3.63	4.54	3.92	7.21	4.38	0.575494270050872	0.464033389056906	0.0207778093612584	5.82621463896862e-11
57	SOL1	259	2016	17.5878945178631	0	2.73422032766917	6	266.712898825518	20	0	3.63	4.54	3.92	7.21	4.38	0.575494270050872	0.464033389056906	0.0207778093612584	5.82621463896862e-11
57	SOL1	260	2016	16.4114914985954	2.64182549392716	2.31976085515704	6	266.712898825518	20	0	3.63	4.54	3.92	7.21	4.38	0.575494270050872	0.464033389056906	0.0207778093612584	5.82621463896862e-11
57	SOL1	261	2016	15.9763886213863	0	3.23726058528296	6	266.712898825518	20	0	3.63	4.54	3.92	7.21	4.38	0.575494270050872	0.464033389056906	0.0207778093612584	5.82621463896862e-11
57	SOL1	262	2016	14.9131254201035	0	1.93408832145515	6	266.712898825518	20	0	3.63	4.54	3.92	7.21	4.38	0.575494270050872	0.464033389056906	0.0207778093612584	5.82621463896862e-11
57	SOL1	263	2016	14.4871299841425	0	1.33166090479176	6	266.712898825518	20	0	3.63	4.54	3.92	7.21	4.38	0.575494270050872	0.464033389056906	0.0207778093612584	5.82621463896862e-11
57	SOL1	264	2016	15.2445751484639	0	1.88738412067961	6	266.712898825518	20	0	3.63	4.54	3.92	7.21	4.38	0.575494270050872	0.464033389056906	0.0207778093612584	5.82621463896862e-11
58	SOL1	265	2016	14.8689953772737	0	1.69484684334122	6	266.712898825518	20	0	3.63	4.54	3.92	7.21	4.38	0.575494270050872	0.464033389056906	0.0207778093612584	5.82621463896862e-11
58	SOL1	266	2016	15.675108020174	0	1.83189895976191	6	266.712898825518	20	0	3.63	4.54	3.92	7.21	4.38	0.575494270050872	0.464033389056906	0.0207778093612584	5.82621463896862e-11
58	SOL1	267	2016	16.9787038845927	0	2.34445091305077	6	266.712898825518	20	0	3.63	4.54	3.92	7.21	4.38	0.575494270050872	0.464033389056906	0.0207778093612584	5.82621463896862e-11
58	SOL1	268	2016	18.13233695387	0.977730318350312	3.40703609957083	6	266.712898825518	20	0	3.63	4.54	3.92	7.21	4.38	0.575494270050872	0.464033389056906	0.0207778093612584	5.82621463896862e-11
58	SOL1	269	2016	14.8039741471991	0	1.78438222806424	6	266.712898825518	20	0	3.63	4.54	3.92	7.21	4.38	0.575494270050872	0.464033389056906	0.0207778093612584	5.82621463896862e-11
58	SOL1	270	2016	15.6196271157143	0	1.6110006240694	6	266.712898825518	20	0	3.63	4.54	3.92	7.21	4.38	0.575494270050872	0.464033389056906	0.0207778093612584	5.82621463896862e-11
58	SOL1	271	2016	17.8473830380689	0	4.32927430931094	6	266.712898825518	20	0	3.63	4.54	3.92	7.21	4.38	0.575494270050872	0.464033389056906	0.0207778093612584	5.82621463896862e-11
58	SOL1	272	2016	18.5915621201173	0.299526180401827	5.46868366022782	6	266.712898825518	20	0	3.63	4.54	3.92	7.21	4.38	0.575494270050872	0.464033389056906	0.0207778093612584	5.82621463896862e-11
58	SOL1	273	2016	15.054757801419	2.01623426580717	2.95096399909465	6	266.712898825518	20	0	3.63	4.54	3.92	7.21	4.38	0.575494270050872	0.464033389056906	0.0207778093612584	5.82621463896862e-11
58	SOL1	274	2016	13.967878127445	0.213913181373791	2.32107345775896	6	266.712898825518	20	0	3.63	4.54	3.92	7.21	4.38	0.575494270050872	0.464033389056906	0.0207778093612584	5.82621463896862e-11
58	SOL1	275	2016	12.3864160347149	1.3164309949699	4.41246550761173	6	266.712898825518	20	0	3.63	4.54	3.92	7.21	4.38	0.575494270050872	0.464033389056906	0.0207778093612584	5.82621463896862e-11
58	SOL1	276	2016	12.8889421946674	1.41685437104247	2.95248734396024	6	266.712898825518	20	0	3.63	4.54	3.92	7.21	4.38	0.575494270050872	0.464033389056906	0.0207778093612584	5.82621463896862e-11
58	SOL1	277	2016	11.3068997441384	0	3.08244390022619	6	266.712898825518	20	0	3.63	4.54	3.92	7.21	4.38	0.575494270050872	0.464033389056906	0.0207778093612584	5.82621463896862e-11
58	SOL1	278	2016	8.55242890214445	0	4.06281163132532	6	266.712898825518	20	0	3.63	4.54	3.92	7.21	4.38	0.575494270050872	0.464033389056906	0.0207778093612584	5.82621463896862e-11
58	SOL1	279	2016	7.35859762042915	0	3.37236853618602	6	266.712898825518	20	0	3.63	4.54	3.92	7.21	4.38	0.575494270050872	0.464033389056906	0.0207778093612584	5.82621463896862e-11
58	SOL1	280	2016	10.7292770769176	1.86633434512702	2.8153837176325	6	266.712898825518	20	0	3.63	4.54	3.92	7.21	4.38	0.575494270050872	0.464033389056906	0.0207778093612584	5.82621463896862e-11
58	SOL1	281	2016	9.82576408668115	0.14282218061424	2.3957623501174	6	266.712898825518	20	0	3.63	4.54	3.92	7.21	4.38	0.575494270050872	0.464033389056906	0.0207778093612584	5.82621463896862e-11
58	SOL1	282	2016	7.67040190970703	0	1.5659681554917	6	266.712898825518	20	0	3.63	4.54	3.92	7.21	4.38	0.575494270050872	0.464033389056906	0.0207778093612584	5.82621463896862e-11
58	SOL1	283	2016	8.56383247347	0	1.30879196831478	6	266.712898825518	20	0	3.63	4.54	3.92	7.21	4.38	0.575494270050872	0.464033389056906	0.0207778093612584	5.82621463896862e-11
58	SOL1	284	2016	7.49097628006237	0.382386465506201	1.74771092654326	6	266.712898825518	20	0	3.63	4.54	3.92	7.21	4.38	0.575494270050872	0.464033389056906	0.0207778093612584	5.82621463896862e-11
58	SOL1	285	2016	8.30438245886272	0.963614110305907	2.8421136098403	6	266.712898825518	20	0	3.63	4.54	3.92	7.21	4.38	0.575494270050872	0.464033389056906	0.0207778093612584	5.82621463896862e-11
58	SOL1	286	2016	7.91710665362329	0	4.66275475812732	6	266.712898825518	20	0	3.63	4.54	3.92	7.21	4.38	0.575494270050872	0.464033389056906	0.0207778093612584	5.82621463896862e-11
58	SOL1	287	2016	9.43153618561924	1.92160434531629	3.84803886423887	6	266.712898825518	20	0	3.63	4.54	3.92	7.21	4.38	0.575494270050872	0.464033389056906	0.0207778093612584	5.82621463896862e-11
58	SOL1	288	2016	11.7089090018811	0.322509049199154	3.21028177876664	6	266.712898825518	20	0	3.63	4.54	3.92	7.21	4.38	0.575494270050872	0.464033389056906	0.0207778093612584	5.82621463896862e-11
58	SOL1	289	2016	13.0006927910395	0	2.77496374314123	6	266.712898825518	20	0	3.63	4.54	3.92	7.21	4.38	0.575494270050872	0.464033389056906	0.0207778093612584	5.82621463896862e-11
58	SOL1	290	2016	13.0632232129229	0	2.35515745016752	6	266.712898825518	20	0	3.63	4.54	3.92	7.21	4.38	0.575494270050872	0.464033389056906	0.0207778093612584	5.82621463896862e-11
58	SOL1	291	2016	11.3214663801552	4.50431938745199	3.34514420040898	6	266.712898825518	20	0	3.63	4.54	3.92	7.21	4.38	0.575494270050872	0.464033389056906	0.0207778093612584	5.82621463896862e-11
58	SOL1	292	2016	8.62134972570848	12.8150305628924	4.49045678582163	6	266.712898825518	20	0	3.63	4.54	3.92	7.21	4.38	0.575494270050872	0.464033389056906	0.0207778093612584	5.82621463896862e-11
58	SOL1	293	2016	7.87030511497702	18.9506731488476	2.08398791145743	6	266.712898825518	20	0	3.63	4.54	3.92	7.21	4.38	0.575494270050872	0.464033389056906	0.0207778093612584	5.82621463896862e-11
58	SOL1	294	2016	6.96277588232997	3.09936769122417	2.42582001192693	6	266.712898825518	20	0	3.63	4.54	3.92	7.21	4.38	0.575494270050872	0.464033389056906	0.0207778093612584	5.82621463896862e-11
58	SOL1	295	2016	7.5728931708579	1.09469824239578	1.91716295661328	6	266.712898825518	20	0	3.63	4.54	3.92	7.21	4.38	0.575494270050872	0.464033389056906	0.0207778093612584	5.82621463896862e-11
58	SOL1	296	2016	5.69191297575457	0.0759335391450215	1.95516366502102	6	266.712898825518	20	0	3.63	4.54	3.92	7.21	4.38	0.575494270050872	0.464033389056906	0.0207778093612584	5.82621463896862e-11
58	SOL1	297	2016	9.65538160345172	10.3665408234766	1.93997407791298	6	266.712898825518	20	0	3.63	4.54	3.92	7.21	4.38	0.575494270050872	0.464033389056906	0.0207778093612584	5.82621463896862e-11
58	SOL1	298	2016	9.9772956016114	0	1.81387487064923	6	266.712898825518	20	0	3.63	4.54	3.92	7.21	4.38	0.575494270050872	0.464033389056906	0.0207778093612584	5.82621463896862e-11
58	SOL1	299	2016	8.47338356033948	0	1.30393933613529	6	266.712898825518	20	0	3.63	4.54	3.92	7.21	4.38	0.575494270050872	0.464033389056906	0.0207778093612584	5.82621463896862e-11
58	SOL1	300	2016	10.9692570175394	0	2.544807498294	6	266.712898825518	20	0	3.63	4.54	3.92	7.21	4.38	0.575494270050872	0.464033389056906	0.0207778093612584	5.82621463896862e-11
58	SOL1	301	2016	12.052582155321	0	3.41944064681272	6	266.712898825518	20	0	3.63	4.54	3.92	7.21	4.38	0.575494270050872	0.464033389056906	0.0207778093612584	5.82621463896862e-11
58	SOL1	302	2016	11.0523853710929	0	2.27638405205601	6	266.712898825518	20	0	3.63	4.54	3.92	7.21	4.38	0.575494270050872	0.464033389056906	0.0207778093612584	5.82621463896862e-11
58	SOL1	303	2016	8.87515872936797	0	1.54590917115642	6	266.712898825518	20	0	3.63	4.54	3.92	7.21	4.38	0.575494270050872	0.464033389056906	0.0207778093612584	5.82621463896862e-11
58	SOL1	304	2016	9.47682713079019	0	1.78488716596308	6	266.712898825518	20	0	3.63	4.54	3.92	7.21	4.38	0.575494270050872	0.464033389056906	0.0207778093612584	5.82621463896862e-11
58	SOL1	305	2016	9.71738944931454	0.315928321498825	2.14915925660638	6	266.712898825518	20	0	3.63	4.54	3.92	7.21	4.38	0.575494270050872	0.464033389056906	0.0207778093612584	5.82621463896862e-11
58	SOL1	306	2016	7.25330712978808	2.40254939610642	3.69267998976601	6	266.712898825518	20	0	3.63	4.54	3.92	7.21	4.38	0.575494270050872	0.464033389056906	0.0207778093612584	5.82621463896862e-11
58	SOL1	307	2016	6.43971341773058	0	2.37114270467463	6	266.712898825518	20	0	3.63	4.54	3.92	7.21	4.38	0.575494270050872	0.464033389056906	0.0207778093612584	5.82621463896862e-11
59	SOL2	125	2016	12.2199622180907	0	3.56778536679497	6	283.266018954301	8	1	3.45	4.91	4.09	7.09	4.64	0.312563240471736	0.663626787791397	0.10647699103046	0.00826558981788564
59	SOL2	126	2016	16.8385772292901	0	3.67169482097355	6	283.266018954301	8	1	3.45	4.91	4.09	7.09	4.64	0.312563240471736	0.663626787791397	0.10647699103046	0.00826558981788564
59	SOL2	127	2016	18.5589260349294	0	3.35437359042004	6	283.266018954301	8	1	3.45	4.91	4.09	7.09	4.64	0.312563240471736	0.663626787791397	0.10647699103046	0.00826558981788564
59	SOL2	128	2016	18.9599767958282	0	4.69638028898913	6	283.266018954301	8	1	3.45	4.91	4.09	7.09	4.64	0.312563240471736	0.663626787791397	0.10647699103046	0.00826558981788564
59	SOL2	129	2016	18.840290504632	0	4.40939491563055	6	283.266018954301	8	1	3.45	4.91	4.09	7.09	4.64	0.312563240471736	0.663626787791397	0.10647699103046	0.00826558981788564
59	SOL2	130	2016	17.0657690220432	0.34346695522957	2.98865308643144	6	283.266018954301	8	1	3.45	4.91	4.09	7.09	4.64	0.312563240471736	0.663626787791397	0.10647699103046	0.00826558981788564
59	SOL2	131	2016	18.6779942845653	0	3.42727710181803	6	283.266018954301	8	1	3.45	4.91	4.09	7.09	4.64	0.312563240471736	0.663626787791397	0.10647699103046	0.00826558981788564
59	SOL2	132	2016	17.3186426587139	0	3.65838892741587	6	283.266018954301	8	1	3.45	4.91	4.09	7.09	4.64	0.312563240471736	0.663626787791397	0.10647699103046	0.00826558981788564
59	SOL2	133	2016	16.8505333591527	0	3.39142187269102	6	283.266018954301	8	1	3.45	4.91	4.09	7.09	4.64	0.312563240471736	0.663626787791397	0.10647699103046	0.00826558981788564
59	SOL2	134	2016	8.71440072318381	0	4.92735306056221	6	283.266018954301	8	1	3.45	4.91	4.09	7.09	4.64	0.312563240471736	0.663626787791397	0.10647699103046	0.00826558981788564
59	SOL2	135	2016	7.80084322432859	0.3422729539537	4.31288918276889	6	283.266018954301	8	1	3.45	4.91	4.09	7.09	4.64	0.312563240471736	0.663626787791397	0.10647699103046	0.00826558981788564
59	SOL2	136	2016	8.8510398359394	0	3.03585800800517	6	283.266018954301	8	1	3.45	4.91	4.09	7.09	4.64	0.312563240471736	0.663626787791397	0.10647699103046	0.00826558981788564
59	SOL2	137	2016	12.7741085667652	0	3.0275591125034	6	283.266018954301	8	1	3.45	4.91	4.09	7.09	4.64	0.312563240471736	0.663626787791397	0.10647699103046	0.00826558981788564
59	SOL2	138	2016	13.9274949763849	1.01285478217077	3.02340132566681	6	283.266018954301	8	1	3.45	4.91	4.09	7.09	4.64	0.312563240471736	0.663626787791397	0.10647699103046	0.00826558981788564
59	SOL2	139	2016	13.2107098011029	0	2.29060332538438	6	283.266018954301	8	1	3.45	4.91	4.09	7.09	4.64	0.312563240471736	0.663626787791397	0.10647699103046	0.00826558981788564
60	SOL2	140	2016	14.0055750169975	0	3.58942578217061	6	283.266018954301	8	1	3.45	4.91	4.09	7.09	4.64	0.312563240471736	0.663626787791397	0.10647699103046	0.00826558981788564
60	SOL2	141	2016	18.4363371541789	0	3.49011863667096	6	283.266018954301	8	1	3.45	4.91	4.09	7.09	4.64	0.312563240471736	0.663626787791397	0.10647699103046	0.00826558981788564
60	SOL2	142	2016	17.0514107428526	4.58375075579171	3.70202806474804	6	283.266018954301	8	1	3.45	4.91	4.09	7.09	4.64	0.312563240471736	0.663626787791397	0.10647699103046	0.00826558981788564
60	SOL2	143	2016	11.1975802854285	10.1647416308771	4.23245410093052	6	283.266018954301	8	1	3.45	4.91	4.09	7.09	4.64	0.312563240471736	0.663626787791397	0.10647699103046	0.00826558981788564
60	SOL2	144	2016	10.2633299698051	0	3.60214452078792	6	283.266018954301	8	1	3.45	4.91	4.09	7.09	4.64	0.312563240471736	0.663626787791397	0.10647699103046	0.00826558981788564
60	SOL2	145	2016	11.7431345587028	0	1.54288323665366	6	283.266018954301	8	1	3.45	4.91	4.09	7.09	4.64	0.312563240471736	0.663626787791397	0.10647699103046	0.00826558981788564
60	SOL2	146	2016	15.611856892427	0.071575639994846	1.74410005061864	6	283.266018954301	8	1	3.45	4.91	4.09	7.09	4.64	0.312563240471736	0.663626787791397	0.10647699103046	0.00826558981788564
60	SOL2	147	2016	16.7543735100717	10.1657302441969	2.16815594759835	6	283.266018954301	8	1	3.45	4.91	4.09	7.09	4.64	0.312563240471736	0.663626787791397	0.10647699103046	0.00826558981788564
60	SOL2	148	2016	16.8915371245123	0.269167078171733	1.79515147272222	6	283.266018954301	8	1	3.45	4.91	4.09	7.09	4.64	0.312563240471736	0.663626787791397	0.10647699103046	0.00826558981788564
60	SOL2	149	2016	16.2525873427483	15.7421973857902	2.62794185025621	6	283.266018954301	8	1	3.45	4.91	4.09	7.09	4.64	0.312563240471736	0.663626787791397	0.10647699103046	0.00826558981788564
60	SOL2	150	2016	15.9699289074113	14.0821675790463	3.54195339634091	6	283.266018954301	8	1	3.45	4.91	4.09	7.09	4.64	0.312563240471736	0.663626787791397	0.10647699103046	0.00826558981788564
60	SOL2	151	2016	16.2059897542342	0.141651336500256	2.91482236104963	6	283.266018954301	8	1	3.45	4.91	4.09	7.09	4.64	0.312563240471736	0.663626787791397	0.10647699103046	0.00826558981788564
60	SOL2	152	2016	15.3499847734088	23.2941788817076	2.53754401403544	6	283.266018954301	8	1	3.45	4.91	4.09	7.09	4.64	0.312563240471736	0.663626787791397	0.10647699103046	0.00826558981788564
61	SOL2	153	2016	17.8145112908471	14.2553927258973	2.36825625859421	6	283.266018954301	8	1	3.45	4.91	4.09	7.09	4.64	0.312563240471736	0.663626787791397	0.10647699103046	0.00826558981788564
61	SOL2	154	2016	16.8876441469267	10.9457470645037	2.07370007053894	6	283.266018954301	8	1	3.45	4.91	4.09	7.09	4.64	0.312563240471736	0.663626787791397	0.10647699103046	0.00826558981788564
61	SOL2	155	2016	16.7021614228432	0.199235041051889	2.29922078436782	6	283.266018954301	8	1	3.45	4.91	4.09	7.09	4.64	0.312563240471736	0.663626787791397	0.10647699103046	0.00826558981788564
61	SOL2	156	2016	18.7410565610698	1.5100408404474	2.10146426778284	6	283.266018954301	8	1	3.45	4.91	4.09	7.09	4.64	0.312563240471736	0.663626787791397	0.10647699103046	0.00826558981788564
61	SOL2	157	2016	19.5647587765094	0.0652005116393322	2.0812026742216	6	283.266018954301	8	1	3.45	4.91	4.09	7.09	4.64	0.312563240471736	0.663626787791397	0.10647699103046	0.00826558981788564
61	SOL2	158	2016	19.1750561452117	5.09919842255393	1.91039596787129	6	283.266018954301	8	1	3.45	4.91	4.09	7.09	4.64	0.312563240471736	0.663626787791397	0.10647699103046	0.00826558981788564
61	SOL2	159	2016	17.8391324295635	0.0294417002088088	2.82944313797221	6	283.266018954301	8	1	3.45	4.91	4.09	7.09	4.64	0.312563240471736	0.663626787791397	0.10647699103046	0.00826558981788564
61	SOL2	160	2016	15.106578257145	0	2.75556288294009	6	283.266018954301	8	1	3.45	4.91	4.09	7.09	4.64	0.312563240471736	0.663626787791397	0.10647699103046	0.00826558981788564
61	SOL2	161	2016	15.4609921629263	0	2.06143435945868	6	283.266018954301	8	1	3.45	4.91	4.09	7.09	4.64	0.312563240471736	0.663626787791397	0.10647699103046	0.00826558981788564
61	SOL2	162	2016	16.9740157871878	0	1.76020589367221	6	283.266018954301	8	1	3.45	4.91	4.09	7.09	4.64	0.312563240471736	0.663626787791397	0.10647699103046	0.00826558981788564
61	SOL2	163	2016	16.0828437021693	5.74747490074353	1.87169018836351	6	283.266018954301	8	1	3.45	4.91	4.09	7.09	4.64	0.312563240471736	0.663626787791397	0.10647699103046	0.00826558981788564
61	SOL2	164	2016	15.5824241332031	7.28360205086103	2.76224670593296	6	283.266018954301	8	1	3.45	4.91	4.09	7.09	4.64	0.312563240471736	0.663626787791397	0.10647699103046	0.00826558981788564
61	SOL2	165	2016	15.1132490739834	2.37541789774896	2.93391876290744	6	283.266018954301	8	1	3.45	4.91	4.09	7.09	4.64	0.312563240471736	0.663626787791397	0.10647699103046	0.00826558981788564
62	SOL2	166	2016	14.4770688562504	1.50591030056323	2.63133433854601	6	283.266018954301	8	1	3.45	4.91	4.09	7.09	4.64	0.312563240471736	0.663626787791397	0.10647699103046	0.00826558981788564
62	SOL2	167	2016	13.5244865753767	6.6545504776175	1.97218273062283	6	283.266018954301	8	1	3.45	4.91	4.09	7.09	4.64	0.312563240471736	0.663626787791397	0.10647699103046	0.00826558981788564
62	SOL2	168	2016	14.1024412164579	5.79217072651529	2.97912270731406	6	283.266018954301	8	1	3.45	4.91	4.09	7.09	4.64	0.312563240471736	0.663626787791397	0.10647699103046	0.00826558981788564
62	SOL2	169	2016	14.0710557783335	3.32163687071511	3.27545870128105	6	283.266018954301	8	1	3.45	4.91	4.09	7.09	4.64	0.312563240471736	0.663626787791397	0.10647699103046	0.00826558981788564
62	SOL2	170	2016	13.2393736868134	0	2.58907156088171	6	283.266018954301	8	1	3.45	4.91	4.09	7.09	4.64	0.312563240471736	0.663626787791397	0.10647699103046	0.00826558981788564
62	SOL2	171	2016	15.3557785664099	6.77801424435523	3.86216669377144	6	283.266018954301	8	1	3.45	4.91	4.09	7.09	4.64	0.312563240471736	0.663626787791397	0.10647699103046	0.00826558981788564
62	SOL2	172	2016	17.9813099893295	0.731212764739868	2.90823285742182	6	283.266018954301	8	1	3.45	4.91	4.09	7.09	4.64	0.312563240471736	0.663626787791397	0.10647699103046	0.00826558981788564
62	SOL2	173	2016	20.5308226375861	0	2.15032607715652	6	283.266018954301	8	1	3.45	4.91	4.09	7.09	4.64	0.312563240471736	0.663626787791397	0.10647699103046	0.00826558981788564
62	SOL2	174	2016	25.3340686750556	1.20255266970594	3.33455677005574	6	283.266018954301	8	1	3.45	4.91	4.09	7.09	4.64	0.312563240471736	0.663626787791397	0.10647699103046	0.00826558981788564
62	SOL2	175	2016	20.6648676608661	0.278779502791526	2.56160345696568	6	283.266018954301	8	1	3.45	4.91	4.09	7.09	4.64	0.312563240471736	0.663626787791397	0.10647699103046	0.00826558981788564
62	SOL2	176	2016	15.3785734229384	15.3825024092577	2.84390731368595	6	283.266018954301	8	1	3.45	4.91	4.09	7.09	4.64	0.312563240471736	0.663626787791397	0.10647699103046	0.00826558981788564
62	SOL2	177	2016	14.533263669424	1.29171626580302	3.12242008606968	6	283.266018954301	8	1	3.45	4.91	4.09	7.09	4.64	0.312563240471736	0.663626787791397	0.10647699103046	0.00826558981788564
62	SOL2	178	2016	15.3622357088598	0.124023837935882	3.39018814083495	6	283.266018954301	8	1	3.45	4.91	4.09	7.09	4.64	0.312563240471736	0.663626787791397	0.10647699103046	0.00826558981788564
63	SOL2	179	2016	17.8240820460537	1.06838024581023	2.32220986249317	6	283.266018954301	8	1	3.45	4.91	4.09	7.09	4.64	0.312563240471736	0.663626787791397	0.10647699103046	0.00826558981788564
63	SOL2	180	2016	17.582253355947	0.705861941400734	4.00796877228485	6	283.266018954301	8	1	3.45	4.91	4.09	7.09	4.64	0.312563240471736	0.663626787791397	0.10647699103046	0.00826558981788564
63	SOL2	181	2016	17.5779277646725	3.88970323391779	3.53392053141263	6	283.266018954301	8	1	3.45	4.91	4.09	7.09	4.64	0.312563240471736	0.663626787791397	0.10647699103046	0.00826558981788564
63	SOL2	182	2016	18.514967879555	1.1980387856736	4.19433553582329	6	283.266018954301	8	1	3.45	4.91	4.09	7.09	4.64	0.312563240471736	0.663626787791397	0.10647699103046	0.00826558981788564
63	SOL2	183	2016	14.3749345965181	0.761137320594597	4.10092439909888	6	283.266018954301	8	1	3.45	4.91	4.09	7.09	4.64	0.312563240471736	0.663626787791397	0.10647699103046	0.00826558981788564
63	SOL2	184	2016	15.1163617252396	0	3.17102109781447	6	283.266018954301	8	1	3.45	4.91	4.09	7.09	4.64	0.312563240471736	0.663626787791397	0.10647699103046	0.00826558981788564
63	SOL2	185	2016	16.8462128508236	0	2.04408957899335	6	283.266018954301	8	1	3.45	4.91	4.09	7.09	4.64	0.312563240471736	0.663626787791397	0.10647699103046	0.00826558981788564
63	SOL2	186	2016	17.1338390382908	0.444842481858771	4.09557982346135	6	283.266018954301	8	1	3.45	4.91	4.09	7.09	4.64	0.312563240471736	0.663626787791397	0.10647699103046	0.00826558981788564
63	SOL2	187	2016	15.4920593812234	0	3.37554438743431	6	283.266018954301	8	1	3.45	4.91	4.09	7.09	4.64	0.312563240471736	0.663626787791397	0.10647699103046	0.00826558981788564
63	SOL2	188	2016	17.1015660201942	0	1.79480598273945	6	283.266018954301	8	1	3.45	4.91	4.09	7.09	4.64	0.312563240471736	0.663626787791397	0.10647699103046	0.00826558981788564
63	SOL2	189	2016	20.1588339918596	0	3.48682121499683	6	283.266018954301	8	1	3.45	4.91	4.09	7.09	4.64	0.312563240471736	0.663626787791397	0.10647699103046	0.00826558981788564
63	SOL2	190	2016	20.3796951870697	0	3.12369597993039	6	283.266018954301	8	1	3.45	4.91	4.09	7.09	4.64	0.312563240471736	0.663626787791397	0.10647699103046	0.00826558981788564
63	SOL2	191	2016	24.1210272560691	0	3.41638239449051	6	283.266018954301	8	1	3.45	4.91	4.09	7.09	4.64	0.312563240471736	0.663626787791397	0.10647699103046	0.00826558981788564
63	SOL2	192	2016	19.7648823092189	0	4.10433515880758	6	283.266018954301	8	1	3.45	4.91	4.09	7.09	4.64	0.312563240471736	0.663626787791397	0.10647699103046	0.00826558981788564
63	SOL2	193	2016	17.0685168900655	3.60832830033562	2.95447228035144	6	283.266018954301	8	1	3.45	4.91	4.09	7.09	4.64	0.312563240471736	0.663626787791397	0.10647699103046	0.00826558981788564
63	SOL2	194	2016	13.8486272470674	3.04230680084557	2.70208685700544	6	283.266018954301	8	1	3.45	4.91	4.09	7.09	4.64	0.312563240471736	0.663626787791397	0.10647699103046	0.00826558981788564
63	SOL2	195	2016	13.685708766331	1.15931230862297	3.54008786598466	6	283.266018954301	8	1	3.45	4.91	4.09	7.09	4.64	0.312563240471736	0.663626787791397	0.10647699103046	0.00826558981788564
63	SOL2	196	2016	15.369168135153	0	3.22814053126645	6	283.266018954301	8	1	3.45	4.91	4.09	7.09	4.64	0.312563240471736	0.663626787791397	0.10647699103046	0.00826558981788564
63	SOL2	197	2016	18.393323800514	0	2.32601320063387	6	283.266018954301	8	1	3.45	4.91	4.09	7.09	4.64	0.312563240471736	0.663626787791397	0.10647699103046	0.00826558981788564
63	SOL2	198	2016	21.241626147403	0	2.85289021982604	6	283.266018954301	8	1	3.45	4.91	4.09	7.09	4.64	0.312563240471736	0.663626787791397	0.10647699103046	0.00826558981788564
63	SOL2	199	2016	21.9351718418755	0	1.99984071330496	6	283.266018954301	8	1	3.45	4.91	4.09	7.09	4.64	0.312563240471736	0.663626787791397	0.10647699103046	0.00826558981788564
63	SOL2	200	2016	23.7100848796101	0	1.79591303060478	6	283.266018954301	8	1	3.45	4.91	4.09	7.09	4.64	0.312563240471736	0.663626787791397	0.10647699103046	0.00826558981788564
63	SOL2	201	2016	26.5918231660111	0	3.18977451874074	6	283.266018954301	8	1	3.45	4.91	4.09	7.09	4.64	0.312563240471736	0.663626787791397	0.10647699103046	0.00826558981788564
63	SOL2	202	2016	23.5534487190067	0.739021674564349	2.58390175483459	6	283.266018954301	8	1	3.45	4.91	4.09	7.09	4.64	0.312563240471736	0.663626787791397	0.10647699103046	0.00826558981788564
63	SOL2	203	2016	21.9268788776296	2.74918463469654	2.31084277193483	6	283.266018954301	8	1	3.45	4.91	4.09	7.09	4.64	0.312563240471736	0.663626787791397	0.10647699103046	0.00826558981788564
63	SOL2	204	2016	20.2798175902195	5.81548989747518	1.90510370964314	6	283.266018954301	8	1	3.45	4.91	4.09	7.09	4.64	0.312563240471736	0.663626787791397	0.10647699103046	0.00826558981788564
63	SOL2	205	2016	21.4388860366205	0	1.7817100146107	6	283.266018954301	8	1	3.45	4.91	4.09	7.09	4.64	0.312563240471736	0.663626787791397	0.10647699103046	0.00826558981788564
63	SOL2	206	2016	21.5322820920213	0.0436011382348835	2.38408092570125	6	283.266018954301	8	1	3.45	4.91	4.09	7.09	4.64	0.312563240471736	0.663626787791397	0.10647699103046	0.00826558981788564
63	SOL2	207	2016	18.5580536271343	0.543927220068953	1.7503002826941	6	283.266018954301	8	1	3.45	4.91	4.09	7.09	4.64	0.312563240471736	0.663626787791397	0.10647699103046	0.00826558981788564
63	SOL2	208	2016	18.892351767295	0.622689993967665	2.8848299793048	6	283.266018954301	8	1	3.45	4.91	4.09	7.09	4.64	0.312563240471736	0.663626787791397	0.10647699103046	0.00826558981788564
63	SOL2	209	2016	18.9612102514624	8.0020350157191	2.5367625041077	6	283.266018954301	8	1	3.45	4.91	4.09	7.09	4.64	0.312563240471736	0.663626787791397	0.10647699103046	0.00826558981788564
63	SOL2	210	2016	18.6203511914719	2.79634758473774	3.16182470183539	6	283.266018954301	8	1	3.45	4.91	4.09	7.09	4.64	0.312563240471736	0.663626787791397	0.10647699103046	0.00826558981788564
63	SOL2	211	2016	19.0012067714121	0	2.59781182507902	6	283.266018954301	8	1	3.45	4.91	4.09	7.09	4.64	0.312563240471736	0.663626787791397	0.10647699103046	0.00826558981788564
63	SOL2	212	2016	16.8451394856489	1.48580343628096	2.51801027097527	6	283.266018954301	8	1	3.45	4.91	4.09	7.09	4.64	0.312563240471736	0.663626787791397	0.10647699103046	0.00826558981788564
64	SOL2	213	2016	16.9467452198206	2.24424269460266	2.43256869798098	6	283.266018954301	8	1	3.45	4.91	4.09	7.09	4.64	0.312563240471736	0.663626787791397	0.10647699103046	0.00826558981788564
64	SOL2	214	2016	16.3601821820089	7.11357311868714	3.15980984774547	6	283.266018954301	8	1	3.45	4.91	4.09	7.09	4.64	0.312563240471736	0.663626787791397	0.10647699103046	0.00826558981788564
64	SOL2	215	2016	18.6544734772884	4.94300513425885	4.24306953155323	6	283.266018954301	8	1	3.45	4.91	4.09	7.09	4.64	0.312563240471736	0.663626787791397	0.10647699103046	0.00826558981788564
64	SOL2	216	2016	17.1687512583546	0	3.40213980933231	6	283.266018954301	8	1	3.45	4.91	4.09	7.09	4.64	0.312563240471736	0.663626787791397	0.10647699103046	0.00826558981788564
64	SOL2	217	2016	16.4943332127262	1.02581281913973	2.82361321337908	6	283.266018954301	8	1	3.45	4.91	4.09	7.09	4.64	0.312563240471736	0.663626787791397	0.10647699103046	0.00826558981788564
64	SOL2	218	2016	17.8608853609174	0	2.80202335482461	6	283.266018954301	8	1	3.45	4.91	4.09	7.09	4.64	0.312563240471736	0.663626787791397	0.10647699103046	0.00826558981788564
64	SOL2	219	2016	20.142678803694	0	3.09798468921864	6	283.266018954301	8	1	3.45	4.91	4.09	7.09	4.64	0.312563240471736	0.663626787791397	0.10647699103046	0.00826558981788564
64	SOL2	220	2016	17.693697314643	0.148087783207257	3.94675736321503	6	283.266018954301	8	1	3.45	4.91	4.09	7.09	4.64	0.312563240471736	0.663626787791397	0.10647699103046	0.00826558981788564
64	SOL2	221	2016	14.3848243009697	1.14371275642748	2.77593017773086	6	283.266018954301	8	1	3.45	4.91	4.09	7.09	4.64	0.312563240471736	0.663626787791397	0.10647699103046	0.00826558981788564
64	SOL2	222	2016	12.0522930534164	4.71181220933171	2.53595740535973	6	283.266018954301	8	1	3.45	4.91	4.09	7.09	4.64	0.312563240471736	0.663626787791397	0.10647699103046	0.00826558981788564
64	SOL2	223	2016	12.5084104897355	5.80410015365547	3.49369665829248	6	283.266018954301	8	1	3.45	4.91	4.09	7.09	4.64	0.312563240471736	0.663626787791397	0.10647699103046	0.00826558981788564
64	SOL2	224	2016	18.2700124403419	0	3.39670566810963	6	283.266018954301	8	1	3.45	4.91	4.09	7.09	4.64	0.312563240471736	0.663626787791397	0.10647699103046	0.00826558981788564
64	SOL2	225	2016	20.2044013312841	0	3.41908486667848	6	283.266018954301	8	1	3.45	4.91	4.09	7.09	4.64	0.312563240471736	0.663626787791397	0.10647699103046	0.00826558981788564
64	SOL2	226	2016	18.3705127615129	0	2.04315100197481	6	283.266018954301	8	1	3.45	4.91	4.09	7.09	4.64	0.312563240471736	0.663626787791397	0.10647699103046	0.00826558981788564
64	SOL2	227	2016	17.3559225727478	0	2.37515579066621	6	283.266018954301	8	1	3.45	4.91	4.09	7.09	4.64	0.312563240471736	0.663626787791397	0.10647699103046	0.00826558981788564
64	SOL2	228	2016	17.3330709305025	0	2.3706031947783	6	283.266018954301	8	1	3.45	4.91	4.09	7.09	4.64	0.312563240471736	0.663626787791397	0.10647699103046	0.00826558981788564
64	SOL2	229	2016	18.299052623847	0	2.46567988261452	6	283.266018954301	8	1	3.45	4.91	4.09	7.09	4.64	0.312563240471736	0.663626787791397	0.10647699103046	0.00826558981788564
64	SOL2	230	2016	18.4693919029763	0	2.00403969041153	6	283.266018954301	8	1	3.45	4.91	4.09	7.09	4.64	0.312563240471736	0.663626787791397	0.10647699103046	0.00826558981788564
64	SOL2	231	2016	19.4736625939015	0.335353940194539	2.22000876505656	6	283.266018954301	8	1	3.45	4.91	4.09	7.09	4.64	0.312563240471736	0.663626787791397	0.10647699103046	0.00826558981788564
64	SOL2	232	2016	19.0184063161196	0	3.49454256566153	6	283.266018954301	8	1	3.45	4.91	4.09	7.09	4.64	0.312563240471736	0.663626787791397	0.10647699103046	0.00826558981788564
64	SOL2	233	2016	16.3828541955665	3.81058015953993	4.25571343872491	6	283.266018954301	8	1	3.45	4.91	4.09	7.09	4.64	0.312563240471736	0.663626787791397	0.10647699103046	0.00826558981788564
64	SOL2	234	2016	17.9956477354244	0.171814534963929	3.11651402559039	6	283.266018954301	8	1	3.45	4.91	4.09	7.09	4.64	0.312563240471736	0.663626787791397	0.10647699103046	0.00826558981788564
64	SOL2	235	2016	22.3072344159187	0	1.94792855565172	6	283.266018954301	8	1	3.45	4.91	4.09	7.09	4.64	0.312563240471736	0.663626787791397	0.10647699103046	0.00826558981788564
64	SOL2	236	2016	25.0419356195796	0	2.98388133095064	6	283.266018954301	8	1	3.45	4.91	4.09	7.09	4.64	0.312563240471736	0.663626787791397	0.10647699103046	0.00826558981788564
65	SOL2	237	2016	26.1947088187545	0	3.24111721620044	6	283.266018954301	8	1	3.45	4.91	4.09	7.09	4.64	0.312563240471736	0.663626787791397	0.10647699103046	0.00826558981788564
65	SOL2	238	2016	26.7800646368811	0	2.38428412368904	6	283.266018954301	8	1	3.45	4.91	4.09	7.09	4.64	0.312563240471736	0.663626787791397	0.10647699103046	0.00826558981788564
65	SOL2	239	2016	25.5217522784297	0.742662866031247	2.49095905890452	6	283.266018954301	8	1	3.45	4.91	4.09	7.09	4.64	0.312563240471736	0.663626787791397	0.10647699103046	0.00826558981788564
65	SOL2	240	2016	25.0344206567592	0	3.55668307904854	6	283.266018954301	8	1	3.45	4.91	4.09	7.09	4.64	0.312563240471736	0.663626787791397	0.10647699103046	0.00826558981788564
65	SOL2	241	2016	17.9917200533452	1.1861528189519	2.67002875297334	6	283.266018954301	8	1	3.45	4.91	4.09	7.09	4.64	0.312563240471736	0.663626787791397	0.10647699103046	0.00826558981788564
65	SOL2	242	2016	17.293868426942	0	1.77960130234682	6	283.266018954301	8	1	3.45	4.91	4.09	7.09	4.64	0.312563240471736	0.663626787791397	0.10647699103046	0.00826558981788564
65	SOL2	243	2016	18.7891781055825	0	2.1360331824794	6	283.266018954301	8	1	3.45	4.91	4.09	7.09	4.64	0.312563240471736	0.663626787791397	0.10647699103046	0.00826558981788564
65	SOL2	244	2016	18.927444558102	0	2.20640066915199	6	283.266018954301	8	1	3.45	4.91	4.09	7.09	4.64	0.312563240471736	0.663626787791397	0.10647699103046	0.00826558981788564
65	SOL2	245	2016	19.6726063873163	0	2.31094695931608	6	283.266018954301	8	1	3.45	4.91	4.09	7.09	4.64	0.312563240471736	0.663626787791397	0.10647699103046	0.00826558981788564
65	SOL2	246	2016	20.2503591531715	1.35049926618613	2.50350621544761	6	283.266018954301	8	1	3.45	4.91	4.09	7.09	4.64	0.312563240471736	0.663626787791397	0.10647699103046	0.00826558981788564
65	SOL2	247	2016	18.578337012622	5.2661189113071	4.62543847087163	6	283.266018954301	8	1	3.45	4.91	4.09	7.09	4.64	0.312563240471736	0.663626787791397	0.10647699103046	0.00826558981788564
65	SOL2	248	2016	17.5917661064977	0	3.13544677934799	6	283.266018954301	8	1	3.45	4.91	4.09	7.09	4.64	0.312563240471736	0.663626787791397	0.10647699103046	0.00826558981788564
65	SOL2	249	2016	18.8627136074039	0	1.73695061477688	6	283.266018954301	8	1	3.45	4.91	4.09	7.09	4.64	0.312563240471736	0.663626787791397	0.10647699103046	0.00826558981788564
65	SOL2	250	2016	19.3749201131605	0	2.32771819873526	6	283.266018954301	8	1	3.45	4.91	4.09	7.09	4.64	0.312563240471736	0.663626787791397	0.10647699103046	0.00826558981788564
65	SOL2	251	2016	21.5255862346138	0	3.0134644023477	6	283.266018954301	8	1	3.45	4.91	4.09	7.09	4.64	0.312563240471736	0.663626787791397	0.10647699103046	0.00826558981788564
65	SOL2	252	2016	17.7711552679694	0	1.96644785927642	6	283.266018954301	8	1	3.45	4.91	4.09	7.09	4.64	0.312563240471736	0.663626787791397	0.10647699103046	0.00826558981788564
65	SOL2	253	2016	19.1062351886205	0	1.72033027309602	6	283.266018954301	8	1	3.45	4.91	4.09	7.09	4.64	0.312563240471736	0.663626787791397	0.10647699103046	0.00826558981788564
65	SOL2	254	2016	19.854537456919	0	1.58003264478452	6	283.266018954301	8	1	3.45	4.91	4.09	7.09	4.64	0.312563240471736	0.663626787791397	0.10647699103046	0.00826558981788564
65	SOL2	255	2016	22.1037750586782	0	1.88314449732155	6	283.266018954301	8	1	3.45	4.91	4.09	7.09	4.64	0.312563240471736	0.663626787791397	0.10647699103046	0.00826558981788564
65	SOL2	256	2016	25.4295648006904	0	2.36548761170982	6	283.266018954301	8	1	3.45	4.91	4.09	7.09	4.64	0.312563240471736	0.663626787791397	0.10647699103046	0.00826558981788564
65	SOL2	257	2016	24.4440736334752	0	2.60375405841979	6	283.266018954301	8	1	3.45	4.91	4.09	7.09	4.64	0.312563240471736	0.663626787791397	0.10647699103046	0.00826558981788564
65	SOL2	258	2016	21.2744430224887	3.01956300964112	3.39940352955757	6	283.266018954301	8	1	3.45	4.91	4.09	7.09	4.64	0.312563240471736	0.663626787791397	0.10647699103046	0.00826558981788564
65	SOL2	259	2016	17.4648945457292	0	2.75654003037569	6	283.266018954301	8	1	3.45	4.91	4.09	7.09	4.64	0.312563240471736	0.663626787791397	0.10647699103046	0.00826558981788564
65	SOL2	260	2016	16.3369408595758	2.53573436958362	2.33846568358092	6	283.266018954301	8	1	3.45	4.91	4.09	7.09	4.64	0.312563240471736	0.663626787791397	0.10647699103046	0.00826558981788564
65	SOL2	261	2016	15.8297707362204	0	3.25596455326206	6	283.266018954301	8	1	3.45	4.91	4.09	7.09	4.64	0.312563240471736	0.663626787791397	0.10647699103046	0.00826558981788564
65	SOL2	262	2016	14.8334692580713	0	1.95365719708962	6	283.266018954301	8	1	3.45	4.91	4.09	7.09	4.64	0.312563240471736	0.663626787791397	0.10647699103046	0.00826558981788564
65	SOL2	263	2016	14.3929361022581	0	1.35107456576501	6	283.266018954301	8	1	3.45	4.91	4.09	7.09	4.64	0.312563240471736	0.663626787791397	0.10647699103046	0.00826558981788564
65	SOL2	264	2016	15.2455104232575	0	1.90621596213482	6	283.266018954301	8	1	3.45	4.91	4.09	7.09	4.64	0.312563240471736	0.663626787791397	0.10647699103046	0.00826558981788564
66	SOL2	265	2016	14.9665373214785	0	1.71414004426733	6	283.266018954301	8	1	3.45	4.91	4.09	7.09	4.64	0.312563240471736	0.663626787791397	0.10647699103046	0.00826558981788564
66	SOL2	266	2016	15.4979797499406	0	1.85347258801911	6	283.266018954301	8	1	3.45	4.91	4.09	7.09	4.64	0.312563240471736	0.663626787791397	0.10647699103046	0.00826558981788564
66	SOL2	267	2016	16.9576288607502	0	2.36549820343676	6	283.266018954301	8	1	3.45	4.91	4.09	7.09	4.64	0.312563240471736	0.663626787791397	0.10647699103046	0.00826558981788564
66	SOL2	268	2016	18.2874943811809	0.634278255430792	3.42859517539792	6	283.266018954301	8	1	3.45	4.91	4.09	7.09	4.64	0.312563240471736	0.663626787791397	0.10647699103046	0.00826558981788564
66	SOL2	269	2016	14.7669648776527	0	1.80338982447932	6	283.266018954301	8	1	3.45	4.91	4.09	7.09	4.64	0.312563240471736	0.663626787791397	0.10647699103046	0.00826558981788564
66	SOL2	270	2016	15.640859352738	0	1.63027093914113	6	283.266018954301	8	1	3.45	4.91	4.09	7.09	4.64	0.312563240471736	0.663626787791397	0.10647699103046	0.00826558981788564
66	SOL2	271	2016	17.8527378916977	0	4.35367023523802	6	283.266018954301	8	1	3.45	4.91	4.09	7.09	4.64	0.312563240471736	0.663626787791397	0.10647699103046	0.00826558981788564
66	SOL2	272	2016	18.4555532734826	0.46901991818225	5.49270850091318	6	283.266018954301	8	1	3.45	4.91	4.09	7.09	4.64	0.312563240471736	0.663626787791397	0.10647699103046	0.00826558981788564
66	SOL2	273	2016	14.8857986272571	1.56989226039463	2.97324237997473	6	283.266018954301	8	1	3.45	4.91	4.09	7.09	4.64	0.312563240471736	0.663626787791397	0.10647699103046	0.00826558981788564
66	SOL2	274	2016	13.9001810261242	0.153938744717193	2.34087042148464	6	283.266018954301	8	1	3.45	4.91	4.09	7.09	4.64	0.312563240471736	0.663626787791397	0.10647699103046	0.00826558981788564
66	SOL2	275	2016	12.2434596006826	1.45684771118925	4.4340110907467	6	283.266018954301	8	1	3.45	4.91	4.09	7.09	4.64	0.312563240471736	0.663626787791397	0.10647699103046	0.00826558981788564
66	SOL2	276	2016	12.7993583157317	0.897542848528119	2.97202661049865	6	283.266018954301	8	1	3.45	4.91	4.09	7.09	4.64	0.312563240471736	0.663626787791397	0.10647699103046	0.00826558981788564
66	SOL2	277	2016	11.372229642466	0	3.10529654483147	6	283.266018954301	8	1	3.45	4.91	4.09	7.09	4.64	0.312563240471736	0.663626787791397	0.10647699103046	0.00826558981788564
66	SOL2	278	2016	8.53588583807235	0	4.0832108363186	6	283.266018954301	8	1	3.45	4.91	4.09	7.09	4.64	0.312563240471736	0.663626787791397	0.10647699103046	0.00826558981788564
66	SOL2	279	2016	7.3879628762324	0	3.39357648238973	6	283.266018954301	8	1	3.45	4.91	4.09	7.09	4.64	0.312563240471736	0.663626787791397	0.10647699103046	0.00826558981788564
66	SOL2	280	2016	10.697811950389	1.54613827645717	2.83692089826589	6	283.266018954301	8	1	3.45	4.91	4.09	7.09	4.64	0.312563240471736	0.663626787791397	0.10647699103046	0.00826558981788564
66	SOL2	281	2016	9.84533171781674	0.0787613435430774	2.41685132074078	6	283.266018954301	8	1	3.45	4.91	4.09	7.09	4.64	0.312563240471736	0.663626787791397	0.10647699103046	0.00826558981788564
66	SOL2	282	2016	7.74064103472138	0	1.58546665064254	6	283.266018954301	8	1	3.45	4.91	4.09	7.09	4.64	0.312563240471736	0.663626787791397	0.10647699103046	0.00826558981788564
66	SOL2	283	2016	8.40926585355158	0.049925265090111	1.32964800982074	6	283.266018954301	8	1	3.45	4.91	4.09	7.09	4.64	0.312563240471736	0.663626787791397	0.10647699103046	0.00826558981788564
66	SOL2	284	2016	7.33997415761857	0.448228576490913	1.76624708944397	6	283.266018954301	8	1	3.45	4.91	4.09	7.09	4.64	0.312563240471736	0.663626787791397	0.10647699103046	0.00826558981788564
66	SOL2	285	2016	8.12558329173009	1.14574177341198	2.8638179258765	6	283.266018954301	8	1	3.45	4.91	4.09	7.09	4.64	0.312563240471736	0.663626787791397	0.10647699103046	0.00826558981788564
66	SOL2	286	2016	7.87229783064829	0	4.68283686057231	6	283.266018954301	8	1	3.45	4.91	4.09	7.09	4.64	0.312563240471736	0.663626787791397	0.10647699103046	0.00826558981788564
66	SOL2	287	2016	9.31787085827237	2.10793263793681	3.86715846879007	6	283.266018954301	8	1	3.45	4.91	4.09	7.09	4.64	0.312563240471736	0.663626787791397	0.10647699103046	0.00826558981788564
66	SOL2	288	2016	11.7079052948853	0.235677796223716	3.23029333579178	6	283.266018954301	8	1	3.45	4.91	4.09	7.09	4.64	0.312563240471736	0.663626787791397	0.10647699103046	0.00826558981788564
66	SOL2	289	2016	13.1531065154085	0	2.79627465426045	6	283.266018954301	8	1	3.45	4.91	4.09	7.09	4.64	0.312563240471736	0.663626787791397	0.10647699103046	0.00826558981788564
66	SOL2	290	2016	13.0468045962958	0	2.37748707423654	6	283.266018954301	8	1	3.45	4.91	4.09	7.09	4.64	0.312563240471736	0.663626787791397	0.10647699103046	0.00826558981788564
66	SOL2	291	2016	11.2690695940493	5.03592087557709	3.36705364619883	6	283.266018954301	8	1	3.45	4.91	4.09	7.09	4.64	0.312563240471736	0.663626787791397	0.10647699103046	0.00826558981788564
66	SOL2	292	2016	8.51556630149556	13.1962696466174	4.51139368996211	6	283.266018954301	8	1	3.45	4.91	4.09	7.09	4.64	0.312563240471736	0.663626787791397	0.10647699103046	0.00826558981788564
66	SOL2	293	2016	7.84265410048066	18.5530047549207	2.10563035678122	6	283.266018954301	8	1	3.45	4.91	4.09	7.09	4.64	0.312563240471736	0.663626787791397	0.10647699103046	0.00826558981788564
66	SOL2	294	2016	6.86555694221083	2.91032153723793	2.44707948887568	6	283.266018954301	8	1	3.45	4.91	4.09	7.09	4.64	0.312563240471736	0.663626787791397	0.10647699103046	0.00826558981788564
66	SOL2	295	2016	7.43104816121463	1.25714399768453	1.93787433535584	6	283.266018954301	8	1	3.45	4.91	4.09	7.09	4.64	0.312563240471736	0.663626787791397	0.10647699103046	0.00826558981788564
66	SOL2	296	2016	5.6572671608079	0.0942102653303731	1.97334924587376	6	283.266018954301	8	1	3.45	4.91	4.09	7.09	4.64	0.312563240471736	0.663626787791397	0.10647699103046	0.00826558981788564
66	SOL2	297	2016	9.54894935715261	10.4941459413035	1.95900089614753	6	283.266018954301	8	1	3.45	4.91	4.09	7.09	4.64	0.312563240471736	0.663626787791397	0.10647699103046	0.00826558981788564
66	SOL2	298	2016	9.79951172762012	0	1.83304067445328	6	283.266018954301	8	1	3.45	4.91	4.09	7.09	4.64	0.312563240471736	0.663626787791397	0.10647699103046	0.00826558981788564
66	SOL2	299	2016	8.38511236087026	0	1.32414806787177	6	283.266018954301	8	1	3.45	4.91	4.09	7.09	4.64	0.312563240471736	0.663626787791397	0.10647699103046	0.00826558981788564
66	SOL2	300	2016	10.8671721140689	0	2.56840812975389	6	283.266018954301	8	1	3.45	4.91	4.09	7.09	4.64	0.312563240471736	0.663626787791397	0.10647699103046	0.00826558981788564
66	SOL2	301	2016	12.0412623155818	0	3.44404044405565	6	283.266018954301	8	1	3.45	4.91	4.09	7.09	4.64	0.312563240471736	0.663626787791397	0.10647699103046	0.00826558981788564
66	SOL2	302	2016	11.0386323869149	0	2.29507769971353	6	283.266018954301	8	1	3.45	4.91	4.09	7.09	4.64	0.312563240471736	0.663626787791397	0.10647699103046	0.00826558981788564
66	SOL2	303	2016	8.9370245998096	0	1.56639165990633	6	283.266018954301	8	1	3.45	4.91	4.09	7.09	4.64	0.312563240471736	0.663626787791397	0.10647699103046	0.00826558981788564
66	SOL2	304	2016	9.55167218847534	0	1.80334451395583	6	283.266018954301	8	1	3.45	4.91	4.09	7.09	4.64	0.312563240471736	0.663626787791397	0.10647699103046	0.00826558981788564
66	SOL2	305	2016	9.79388485103835	0.371224561390099	2.17061956854382	6	283.266018954301	8	1	3.45	4.91	4.09	7.09	4.64	0.312563240471736	0.663626787791397	0.10647699103046	0.00826558981788564
66	SOL2	306	2016	7.19953487970029	2.32127487032207	3.71472794289178	6	283.266018954301	8	1	3.45	4.91	4.09	7.09	4.64	0.312563240471736	0.663626787791397	0.10647699103046	0.00826558981788564
66	SOL2	307	2016	6.56524226472172	0	2.39309926061218	6	283.266018954301	8	1	3.45	4.91	4.09	7.09	4.64	0.312563240471736	0.663626787791397	0.10647699103046	0.00826558981788564
67	SPE1	104	2016	10.8474150677515	4.03794188387848	1.87262703088813	4	320.809248034592	11	0	7	5.45	5.09	6.55	5	0.0592285099939809	0.613364479084216	5.82621463896862e-11	2.29941460826379e-11
67	SPE1	105	2016	12.2952300371633	0	4.32094355790744	4	320.809248034592	11	0	7	5.45	5.09	6.55	5	0.0592285099939809	0.613364479084216	5.82621463896862e-11	2.29941460826379e-11
67	SPE1	106	2016	10.3163004976993	2.37116250442111	4.22836862208989	4	320.809248034592	11	0	7	5.45	5.09	6.55	5	0.0592285099939809	0.613364479084216	5.82621463896862e-11	2.29941460826379e-11
67	SPE1	107	2016	7.11388809079722	0.113671285873192	2.65791251055432	4	320.809248034592	11	0	7	5.45	5.09	6.55	5	0.0592285099939809	0.613364479084216	5.82621463896862e-11	2.29941460826379e-11
67	SPE1	108	2016	7.88225869967298	0	2.8525609556302	4	320.809248034592	11	0	7	5.45	5.09	6.55	5	0.0592285099939809	0.613364479084216	5.82621463896862e-11	2.29941460826379e-11
67	SPE1	109	2016	9.95391038106615	0	3.35360987637467	4	320.809248034592	11	0	7	5.45	5.09	6.55	5	0.0592285099939809	0.613364479084216	5.82621463896862e-11	2.29941460826379e-11
67	SPE1	110	2016	8.53251225830238	0	2.33962888021309	4	320.809248034592	11	0	7	5.45	5.09	6.55	5	0.0592285099939809	0.613364479084216	5.82621463896862e-11	2.29941460826379e-11
67	SPE1	111	2016	12.1596760880721	0	2.39018038292879	4	320.809248034592	11	0	7	5.45	5.09	6.55	5	0.0592285099939809	0.613364479084216	5.82621463896862e-11	2.29941460826379e-11
67	SPE1	112	2016	10.7264389694806	0.00102777019068556	2.82929628389881	4	320.809248034592	11	0	7	5.45	5.09	6.55	5	0.0592285099939809	0.613364479084216	5.82621463896862e-11	2.29941460826379e-11
67	SPE1	113	2016	6.85642050681079	0	3.50236997302747	4	320.809248034592	11	0	7	5.45	5.09	6.55	5	0.0592285099939809	0.613364479084216	5.82621463896862e-11	2.29941460826379e-11
67	SPE1	114	2016	4.25836050712438	1.32422649434407	3.61569497399096	4	320.809248034592	11	0	7	5.45	5.09	6.55	5	0.0592285099939809	0.613364479084216	5.82621463896862e-11	2.29941460826379e-11
67	SPE1	115	2016	4.33137889773046	7.81251517542207	4.20976685109348	4	320.809248034592	11	0	7	5.45	5.09	6.55	5	0.0592285099939809	0.613364479084216	5.82621463896862e-11	2.29941460826379e-11
67	SPE1	116	2016	3.90447310266018	4.71871255670808	5.2761431428838	4	320.809248034592	11	0	7	5.45	5.09	6.55	5	0.0592285099939809	0.613364479084216	5.82621463896862e-11	2.29941460826379e-11
67	SPE1	117	2016	5.15797855943829	4.86806214736701	5.37658964662069	4	320.809248034592	11	0	7	5.45	5.09	6.55	5	0.0592285099939809	0.613364479084216	5.82621463896862e-11	2.29941460826379e-11
67	SPE1	118	2016	5.35784603650767	2.09443183740252	2.91503496715524	4	320.809248034592	11	0	7	5.45	5.09	6.55	5	0.0592285099939809	0.613364479084216	5.82621463896862e-11	2.29941460826379e-11
67	SPE1	119	2016	7.35674239148254	6.74821106275238	4.1500852579581	4	320.809248034592	11	0	7	5.45	5.09	6.55	5	0.0592285099939809	0.613364479084216	5.82621463896862e-11	2.29941460826379e-11
68	SPE1	120	2016	7.49291070735419	1.54545952012048	2.5381187672952	4	320.809248034592	11	0	7	5.45	5.09	6.55	5	0.0592285099939809	0.613364479084216	5.82621463896862e-11	2.29941460826379e-11
68	SPE1	121	2016	9.0279174836399	0	4.08802343814258	4	320.809248034592	11	0	7	5.45	5.09	6.55	5	0.0592285099939809	0.613364479084216	5.82621463896862e-11	2.29941460826379e-11
68	SPE1	122	2016	11.9807872146963	2.66962884283658	1.65003667007844	4	320.809248034592	11	0	7	5.45	5.09	6.55	5	0.0592285099939809	0.613364479084216	5.82621463896862e-11	2.29941460826379e-11
68	SPE1	123	2016	11.2092359410025	0	3.53312741426312	4	320.809248034592	11	0	7	5.45	5.09	6.55	5	0.0592285099939809	0.613364479084216	5.82621463896862e-11	2.29941460826379e-11
68	SPE1	124	2016	9.67881528146103	0	1.83951060267763	4	320.809248034592	11	0	7	5.45	5.09	6.55	5	0.0592285099939809	0.613364479084216	5.82621463896862e-11	2.29941460826379e-11
68	SPE1	125	2016	13.2135113963065	0	3.35854253311582	4	320.809248034592	11	0	7	5.45	5.09	6.55	5	0.0592285099939809	0.613364479084216	5.82621463896862e-11	2.29941460826379e-11
68	SPE1	126	2016	17.2634704095232	0	3.49819660577324	4	320.809248034592	11	0	7	5.45	5.09	6.55	5	0.0592285099939809	0.613364479084216	5.82621463896862e-11	2.29941460826379e-11
68	SPE1	127	2016	19.3867540879467	0	3.20485512239374	4	320.809248034592	11	0	7	5.45	5.09	6.55	5	0.0592285099939809	0.613364479084216	5.82621463896862e-11	2.29941460826379e-11
68	SPE1	128	2016	20.4862251578225	0	4.53337167820526	4	320.809248034592	11	0	7	5.45	5.09	6.55	5	0.0592285099939809	0.613364479084216	5.82621463896862e-11	2.29941460826379e-11
68	SPE1	129	2016	19.6773562467318	0	4.24933533937154	4	320.809248034592	11	0	7	5.45	5.09	6.55	5	0.0592285099939809	0.613364479084216	5.82621463896862e-11	2.29941460826379e-11
68	SPE1	130	2016	18.5726830005881	0	2.84281047298419	4	320.809248034592	11	0	7	5.45	5.09	6.55	5	0.0592285099939809	0.613364479084216	5.82621463896862e-11	2.29941460826379e-11
68	SPE1	131	2016	19.970938182955	0.00887533892255288	3.25701701986272	4	320.809248034592	11	0	7	5.45	5.09	6.55	5	0.0592285099939809	0.613364479084216	5.82621463896862e-11	2.29941460826379e-11
68	SPE1	132	2016	19.7465290201139	0	3.60238286836628	4	320.809248034592	11	0	7	5.45	5.09	6.55	5	0.0592285099939809	0.613364479084216	5.82621463896862e-11	2.29941460826379e-11
68	SPE1	133	2016	17.6874892077783	0	3.30576986063541	4	320.809248034592	11	0	7	5.45	5.09	6.55	5	0.0592285099939809	0.613364479084216	5.82621463896862e-11	2.29941460826379e-11
69	SPE1	134	2016	9.24300009499336	0.15619893855588	4.77506515509731	4	320.809248034592	11	0	7	5.45	5.09	6.55	5	0.0592285099939809	0.613364479084216	5.82621463896862e-11	2.29941460826379e-11
69	SPE1	135	2016	8.67011506257911	0.307467796760948	4.1626196124685	4	320.809248034592	11	0	7	5.45	5.09	6.55	5	0.0592285099939809	0.613364479084216	5.82621463896862e-11	2.29941460826379e-11
69	SPE1	136	2016	9.47422944682671	0	2.88039091736562	4	320.809248034592	11	0	7	5.45	5.09	6.55	5	0.0592285099939809	0.613364479084216	5.82621463896862e-11	2.29941460826379e-11
69	SPE1	137	2016	12.9541401498537	0	2.86802723414874	4	320.809248034592	11	0	7	5.45	5.09	6.55	5	0.0592285099939809	0.613364479084216	5.82621463896862e-11	2.29941460826379e-11
69	SPE1	138	2016	14.6024421613076	1.80195420138639	2.8251047006367	4	320.809248034592	11	0	7	5.45	5.09	6.55	5	0.0592285099939809	0.613364479084216	5.82621463896862e-11	2.29941460826379e-11
69	SPE1	139	2016	13.578360172736	0.0262540529883746	2.12097474905689	4	320.809248034592	11	0	7	5.45	5.09	6.55	5	0.0592285099939809	0.613364479084216	5.82621463896862e-11	2.29941460826379e-11
69	SPE1	140	2016	14.0353503267642	0.119972013284569	3.40552454189249	4	320.809248034592	11	0	7	5.45	5.09	6.55	5	0.0592285099939809	0.613364479084216	5.82621463896862e-11	2.29941460826379e-11
69	SPE1	141	2016	18.698194243527	0	3.32370700564236	4	320.809248034592	11	0	7	5.45	5.09	6.55	5	0.0592285099939809	0.613364479084216	5.82621463896862e-11	2.29941460826379e-11
69	SPE1	142	2016	17.8965514373136	5.39567123630303	3.5071220661698	4	320.809248034592	11	0	7	5.45	5.09	6.55	5	0.0592285099939809	0.613364479084216	5.82621463896862e-11	2.29941460826379e-11
69	SPE1	143	2016	12.49686562419	7.48396674438554	3.99973590319601	4	320.809248034592	11	0	7	5.45	5.09	6.55	5	0.0592285099939809	0.613364479084216	5.82621463896862e-11	2.29941460826379e-11
69	SPE1	144	2016	11.183839165455	0	3.45155234321218	4	320.809248034592	11	0	7	5.45	5.09	6.55	5	0.0592285099939809	0.613364479084216	5.82621463896862e-11	2.29941460826379e-11
69	SPE1	145	2016	13.027719901502	0	1.38767301012931	4	320.809248034592	11	0	7	5.45	5.09	6.55	5	0.0592285099939809	0.613364479084216	5.82621463896862e-11	2.29941460826379e-11
69	SPE1	146	2016	16.2196664656487	0.295691016295429	1.56628136706955	4	320.809248034592	11	0	7	5.45	5.09	6.55	5	0.0592285099939809	0.613364479084216	5.82621463896862e-11	2.29941460826379e-11
69	SPE1	147	2016	17.7632446138512	0.19093278703317	2.01148904144067	4	320.809248034592	11	0	7	5.45	5.09	6.55	5	0.0592285099939809	0.613364479084216	5.82621463896862e-11	2.29941460826379e-11
70	SPE1	148	2016	18.8693566917063	0.00469098743101726	1.63686254039614	4	320.809248034592	11	0	7	5.45	5.09	6.55	5	0.0592285099939809	0.613364479084216	5.82621463896862e-11	2.29941460826379e-11
70	SPE1	149	2016	17.6498433828935	10.1579298734962	2.53042550217964	4	320.809248034592	11	0	7	5.45	5.09	6.55	5	0.0592285099939809	0.613364479084216	5.82621463896862e-11	2.29941460826379e-11
70	SPE1	150	2016	17.1541527742724	23.2746604473286	3.35291806767405	4	320.809248034592	11	0	7	5.45	5.09	6.55	5	0.0592285099939809	0.613364479084216	5.82621463896862e-11	2.29941460826379e-11
70	SPE1	151	2016	17.6924754429703	5.60837601263122	2.71728200885935	4	320.809248034592	11	0	7	5.45	5.09	6.55	5	0.0592285099939809	0.613364479084216	5.82621463896862e-11	2.29941460826379e-11
70	SPE1	152	2016	17.1818638800609	20.9060245479845	2.35162450340972	4	320.809248034592	11	0	7	5.45	5.09	6.55	5	0.0592285099939809	0.613364479084216	5.82621463896862e-11	2.29941460826379e-11
70	SPE1	153	2016	18.9535743323898	7.76905178328616	2.18082113478306	4	320.809248034592	11	0	7	5.45	5.09	6.55	5	0.0592285099939809	0.613364479084216	5.82621463896862e-11	2.29941460826379e-11
70	SPE1	154	2016	18.8198113818105	2.0802608146285	1.89498003447382	4	320.809248034592	11	0	7	5.45	5.09	6.55	5	0.0592285099939809	0.613364479084216	5.82621463896862e-11	2.29941460826379e-11
70	SPE1	155	2016	19.0324476045896	0.836195306671636	2.12586865959911	4	320.809248034592	11	0	7	5.45	5.09	6.55	5	0.0592285099939809	0.613364479084216	5.82621463896862e-11	2.29941460826379e-11
70	SPE1	156	2016	20.62574130019	3.66007679762012	1.95134786242461	4	320.809248034592	11	0	7	5.45	5.09	6.55	5	0.0592285099939809	0.613364479084216	5.82621463896862e-11	2.29941460826379e-11
70	SPE1	157	2016	20.8859692271131	0.272424515106488	1.93474098973637	4	320.809248034592	11	0	7	5.45	5.09	6.55	5	0.0592285099939809	0.613364479084216	5.82621463896862e-11	2.29941460826379e-11
70	SPE1	158	2016	19.3916089430532	10.1689468441341	1.74072528996655	4	320.809248034592	11	0	7	5.45	5.09	6.55	5	0.0592285099939809	0.613364479084216	5.82621463896862e-11	2.29941460826379e-11
70	SPE1	159	2016	18.0496205377074	0	2.66341766938905	4	320.809248034592	11	0	7	5.45	5.09	6.55	5	0.0592285099939809	0.613364479084216	5.82621463896862e-11	2.29941460826379e-11
70	SPE1	160	2016	15.868361340896	0	2.55809386560255	4	320.809248034592	11	0	7	5.45	5.09	6.55	5	0.0592285099939809	0.613364479084216	5.82621463896862e-11	2.29941460826379e-11
71	SPE1	161	2016	16.2130810025071	0	1.901762365257	4	320.809248034592	11	0	7	5.45	5.09	6.55	5	0.0592285099939809	0.613364479084216	5.82621463896862e-11	2.29941460826379e-11
71	SPE1	162	2016	17.9369898038699	0	1.59620474927411	4	320.809248034592	11	0	7	5.45	5.09	6.55	5	0.0592285099939809	0.613364479084216	5.82621463896862e-11	2.29941460826379e-11
71	SPE1	163	2016	16.4825426839533	4.08087724836629	1.65516055425841	4	320.809248034592	11	0	7	5.45	5.09	6.55	5	0.0592285099939809	0.613364479084216	5.82621463896862e-11	2.29941460826379e-11
71	SPE1	164	2016	15.9758673676604	9.27208710976744	2.562778059409	4	320.809248034592	11	0	7	5.45	5.09	6.55	5	0.0592285099939809	0.613364479084216	5.82621463896862e-11	2.29941460826379e-11
71	SPE1	165	2016	16.343732775939	0.132882880516374	2.76140925751249	4	320.809248034592	11	0	7	5.45	5.09	6.55	5	0.0592285099939809	0.613364479084216	5.82621463896862e-11	2.29941460826379e-11
71	SPE1	166	2016	14.7791962907793	7.73535491262521	2.40931359786954	4	320.809248034592	11	0	7	5.45	5.09	6.55	5	0.0592285099939809	0.613364479084216	5.82621463896862e-11	2.29941460826379e-11
71	SPE1	167	2016	14.9126022147808	8.47483960343367	1.78357958037888	4	320.809248034592	11	0	7	5.45	5.09	6.55	5	0.0592285099939809	0.613364479084216	5.82621463896862e-11	2.29941460826379e-11
71	SPE1	168	2016	14.7575118287163	4.72779341424063	2.77755122448802	4	320.809248034592	11	0	7	5.45	5.09	6.55	5	0.0592285099939809	0.613364479084216	5.82621463896862e-11	2.29941460826379e-11
71	SPE1	169	2016	14.6622051342916	9.55669293098229	3.07783387597196	4	320.809248034592	11	0	7	5.45	5.09	6.55	5	0.0592285099939809	0.613364479084216	5.82621463896862e-11	2.29941460826379e-11
71	SPE1	170	2016	14.5969961321108	0	2.41870531919981	4	320.809248034592	11	0	7	5.45	5.09	6.55	5	0.0592285099939809	0.613364479084216	5.82621463896862e-11	2.29941460826379e-11
71	SPE1	171	2016	15.6890538138397	11.0017048663514	3.68991798546861	4	320.809248034592	11	0	7	5.45	5.09	6.55	5	0.0592285099939809	0.613364479084216	5.82621463896862e-11	2.29941460826379e-11
71	SPE1	172	2016	17.8716416567753	5.17789350769858	2.72280898412543	4	320.809248034592	11	0	7	5.45	5.09	6.55	5	0.0592285099939809	0.613364479084216	5.82621463896862e-11	2.29941460826379e-11
71	SPE1	173	2016	20.7567250718344	0	1.99813789264895	4	320.809248034592	11	0	7	5.45	5.09	6.55	5	0.0592285099939809	0.613364479084216	5.82621463896862e-11	2.29941460826379e-11
71	SPE1	174	2016	24.9616307794048	14.4003395364519	3.13581478656413	4	320.809248034592	11	0	7	5.45	5.09	6.55	5	0.0592285099939809	0.613364479084216	5.82621463896862e-11	2.29941460826379e-11
71	SPE1	175	2016	21.5202009488915	0.421898101848535	2.39531447401703	4	320.809248034592	11	0	7	5.45	5.09	6.55	5	0.0592285099939809	0.613364479084216	5.82621463896862e-11	2.29941460826379e-11
71	SPE1	176	2016	15.9354809442456	21.2895141335808	2.64910645003682	4	320.809248034592	11	0	7	5.45	5.09	6.55	5	0.0592285099939809	0.613364479084216	5.82621463896862e-11	2.29941460826379e-11
71	SPE1	177	2016	14.6182751966343	6.68559783557474	2.96211422800825	4	320.809248034592	11	0	7	5.45	5.09	6.55	5	0.0592285099939809	0.613364479084216	5.82621463896862e-11	2.29941460826379e-11
72	SPE1	178	2016	15.1006295746536	3.72721081752019	3.22400910906442	4	320.809248034592	11	0	7	5.45	5.09	6.55	5	0.0592285099939809	0.613364479084216	5.82621463896862e-11	2.29941460826379e-11
72	SPE1	179	2016	17.9944677303561	7.49934939948572	2.12215225508986	4	320.809248034592	11	0	7	5.45	5.09	6.55	5	0.0592285099939809	0.613364479084216	5.82621463896862e-11	2.29941460826379e-11
72	SPE1	180	2016	17.3308210756704	0.332688812197057	3.84370751919629	4	320.809248034592	11	0	7	5.45	5.09	6.55	5	0.0592285099939809	0.613364479084216	5.82621463896862e-11	2.29941460826379e-11
72	SPE1	181	2016	17.9853015771635	1.9318835468956	3.35972272431622	4	320.809248034592	11	0	7	5.45	5.09	6.55	5	0.0592285099939809	0.613364479084216	5.82621463896862e-11	2.29941460826379e-11
72	SPE1	182	2016	19.266663334966	5.98803317965225	4.01499021025645	4	320.809248034592	11	0	7	5.45	5.09	6.55	5	0.0592285099939809	0.613364479084216	5.82621463896862e-11	2.29941460826379e-11
72	SPE1	183	2016	15.0451129825441	0.568857979057388	3.9481213633607	4	320.809248034592	11	0	7	5.45	5.09	6.55	5	0.0592285099939809	0.613364479084216	5.82621463896862e-11	2.29941460826379e-11
72	SPE1	184	2016	15.2088695868141	2.92922659375969	3.01242113628622	4	320.809248034592	11	0	7	5.45	5.09	6.55	5	0.0592285099939809	0.613364479084216	5.82621463896862e-11	2.29941460826379e-11
72	SPE1	185	2016	17.4057122117482	0.0333399903455938	1.8522523262202	4	320.809248034592	11	0	7	5.45	5.09	6.55	5	0.0592285099939809	0.613364479084216	5.82621463896862e-11	2.29941460826379e-11
72	SPE1	186	2016	17.0159425419605	1.64051526783397	3.96803561999744	4	320.809248034592	11	0	7	5.45	5.09	6.55	5	0.0592285099939809	0.613364479084216	5.82621463896862e-11	2.29941460826379e-11
72	SPE1	187	2016	15.6434913929783	0	3.26008208678508	4	320.809248034592	11	0	7	5.45	5.09	6.55	5	0.0592285099939809	0.613364479084216	5.82621463896862e-11	2.29941460826379e-11
72	SPE1	188	2016	17.0286336950172	0	1.63964490929762	4	320.809248034592	11	0	7	5.45	5.09	6.55	5	0.0592285099939809	0.613364479084216	5.82621463896862e-11	2.29941460826379e-11
72	SPE1	189	2016	19.8269398687406	0	3.32738641185663	4	320.809248034592	11	0	7	5.45	5.09	6.55	5	0.0592285099939809	0.613364479084216	5.82621463896862e-11	2.29941460826379e-11
72	SPE1	190	2016	20.4004846100681	0	2.97308045938148	4	320.809248034592	11	0	7	5.45	5.09	6.55	5	0.0592285099939809	0.613364479084216	5.82621463896862e-11	2.29941460826379e-11
72	SPE1	191	2016	24.1980428694564	0	3.24619920992569	4	320.809248034592	11	0	7	5.45	5.09	6.55	5	0.0592285099939809	0.613364479084216	5.82621463896862e-11	2.29941460826379e-11
72	SPE1	192	2016	20.0427394928311	0	3.97879959010943	4	320.809248034592	11	0	7	5.45	5.09	6.55	5	0.0592285099939809	0.613364479084216	5.82621463896862e-11	2.29941460826379e-11
72	SPE1	193	2016	17.8785185209475	1.12775309923672	2.82414422032606	4	320.809248034592	11	0	7	5.45	5.09	6.55	5	0.0592285099939809	0.613364479084216	5.82621463896862e-11	2.29941460826379e-11
72	SPE1	194	2016	14.8663337752843	2.59328762918953	2.53145114886154	4	320.809248034592	11	0	7	5.45	5.09	6.55	5	0.0592285099939809	0.613364479084216	5.82621463896862e-11	2.29941460826379e-11
72	SPE1	195	2016	14.7314237969209	0.0684937067489828	3.39374629951786	4	320.809248034592	11	0	7	5.45	5.09	6.55	5	0.0592285099939809	0.613364479084216	5.82621463896862e-11	2.29941460826379e-11
72	SPE1	196	2016	16.4596607049872	0	3.07995951904252	4	320.809248034592	11	0	7	5.45	5.09	6.55	5	0.0592285099939809	0.613364479084216	5.82621463896862e-11	2.29941460826379e-11
73	SPE1	197	2016	18.7048948181878	0	2.18687177423996	4	320.809248034592	11	0	7	5.45	5.09	6.55	5	0.0592285099939809	0.613364479084216	5.82621463896862e-11	2.29941460826379e-11
73	SPE1	198	2016	20.6001202835582	0.128160918659273	2.71951157683133	4	320.809248034592	11	0	7	5.45	5.09	6.55	5	0.0592285099939809	0.613364479084216	5.82621463896862e-11	2.29941460826379e-11
73	SPE1	199	2016	21.6460106682295	0	1.86605622379997	4	320.809248034592	11	0	7	5.45	5.09	6.55	5	0.0592285099939809	0.613364479084216	5.82621463896862e-11	2.29941460826379e-11
73	SPE1	200	2016	23.9684169303146	0	1.59006192193708	4	320.809248034592	11	0	7	5.45	5.09	6.55	5	0.0592285099939809	0.613364479084216	5.82621463896862e-11	2.29941460826379e-11
73	SPE1	201	2016	26.4514848628341	0.161127341848097	3.00606708818583	4	320.809248034592	11	0	7	5.45	5.09	6.55	5	0.0592285099939809	0.613364479084216	5.82621463896862e-11	2.29941460826379e-11
73	SPE1	202	2016	24.5285815601106	0	2.36045756922614	4	320.809248034592	11	0	7	5.45	5.09	6.55	5	0.0592285099939809	0.613364479084216	5.82621463896862e-11	2.29941460826379e-11
73	SPE1	203	2016	23.052756264159	0	2.14472932540311	4	320.809248034592	11	0	7	5.45	5.09	6.55	5	0.0592285099939809	0.613364479084216	5.82621463896862e-11	2.29941460826379e-11
73	SPE1	204	2016	21.7196446294914	0.346025790537126	1.73416164343696	4	320.809248034592	11	0	7	5.45	5.09	6.55	5	0.0592285099939809	0.613364479084216	5.82621463896862e-11	2.29941460826379e-11
73	SPE1	205	2016	21.7535525667721	0	1.56688189612546	4	320.809248034592	11	0	7	5.45	5.09	6.55	5	0.0592285099939809	0.613364479084216	5.82621463896862e-11	2.29941460826379e-11
73	SPE1	206	2016	21.9204402527737	0	2.22131532789796	4	320.809248034592	11	0	7	5.45	5.09	6.55	5	0.0592285099939809	0.613364479084216	5.82621463896862e-11	2.29941460826379e-11
73	SPE1	207	2016	20.1088233842546	0	1.5552990340734	4	320.809248034592	11	0	7	5.45	5.09	6.55	5	0.0592285099939809	0.613364479084216	5.82621463896862e-11	2.29941460826379e-11
73	SPE1	208	2016	19.8947567794908	0.77595041035966	2.7353103654994	4	320.809248034592	11	0	7	5.45	5.09	6.55	5	0.0592285099939809	0.613364479084216	5.82621463896862e-11	2.29941460826379e-11
73	SPE1	209	2016	19.865414690338	1.86472705567275	2.34070084421878	4	320.809248034592	11	0	7	5.45	5.09	6.55	5	0.0592285099939809	0.613364479084216	5.82621463896862e-11	2.29941460826379e-11
73	SPE1	210	2016	19.2729395025676	0.163009906433877	3.00464622355301	4	320.809248034592	11	0	7	5.45	5.09	6.55	5	0.0592285099939809	0.613364479084216	5.82621463896862e-11	2.29941460826379e-11
73	SPE1	211	2016	19.2089819457944	0	2.42597964854729	4	320.809248034592	11	0	7	5.45	5.09	6.55	5	0.0592285099939809	0.613364479084216	5.82621463896862e-11	2.29941460826379e-11
73	SPE1	212	2016	17.3150113360119	3.94971430714081	2.33005711518081	4	320.809248034592	11	0	7	5.45	5.09	6.55	5	0.0592285099939809	0.613364479084216	5.82621463896862e-11	2.29941460826379e-11
73	SPE1	213	2016	16.9204046673364	4.38376422732504	2.24075873176529	4	320.809248034592	11	0	7	5.45	5.09	6.55	5	0.0592285099939809	0.613364479084216	5.82621463896862e-11	2.29941460826379e-11
73	SPE1	214	2016	16.169215831117	7.97625710541986	2.93177191493546	4	320.809248034592	11	0	7	5.45	5.09	6.55	5	0.0592285099939809	0.613364479084216	5.82621463896862e-11	2.29941460826379e-11
73	SPE1	215	2016	18.7120810841627	9.99653916715363	4.08707471833224	4	320.809248034592	11	0	7	5.45	5.09	6.55	5	0.0592285099939809	0.613364479084216	5.82621463896862e-11	2.29941460826379e-11
73	SPE1	216	2016	17.778029371025	0	3.30192288357195	4	320.809248034592	11	0	7	5.45	5.09	6.55	5	0.0592285099939809	0.613364479084216	5.82621463896862e-11	2.29941460826379e-11
73	SPE1	217	2016	17.0512053615873	1.02602526307269	2.66451223498329	4	320.809248034592	11	0	7	5.45	5.09	6.55	5	0.0592285099939809	0.613364479084216	5.82621463896862e-11	2.29941460826379e-11
73	SPE1	218	2016	17.5115109913058	0	2.63515461020077	4	320.809248034592	11	0	7	5.45	5.09	6.55	5	0.0592285099939809	0.613364479084216	5.82621463896862e-11	2.29941460826379e-11
73	SPE1	219	2016	19.7155035009489	0	2.96710320877617	4	320.809248034592	11	0	7	5.45	5.09	6.55	5	0.0592285099939809	0.613364479084216	5.82621463896862e-11	2.29941460826379e-11
73	SPE1	220	2016	18.1346403596039	0.231856299080022	3.82309381848047	4	320.809248034592	11	0	7	5.45	5.09	6.55	5	0.0592285099939809	0.613364479084216	5.82621463896862e-11	2.29941460826379e-11
74	SPE1	221	2016	14.8759208251387	0.992996259444143	2.6072624761688	4	320.809248034592	11	0	7	5.45	5.09	6.55	5	0.0592285099939809	0.613364479084216	5.82621463896862e-11	2.29941460826379e-11
74	SPE1	222	2016	13.006511358115	1.74587796421196	2.37376359919581	4	320.809248034592	11	0	7	5.45	5.09	6.55	5	0.0592285099939809	0.613364479084216	5.82621463896862e-11	2.29941460826379e-11
74	SPE1	223	2016	12.4674376849459	7.16706631573298	3.32766104609707	4	320.809248034592	11	0	7	5.45	5.09	6.55	5	0.0592285099939809	0.613364479084216	5.82621463896862e-11	2.29941460826379e-11
74	SPE1	224	2016	18.375259211642	0.112643201551672	3.24052921934182	4	320.809248034592	11	0	7	5.45	5.09	6.55	5	0.0592285099939809	0.613364479084216	5.82621463896862e-11	2.29941460826379e-11
74	SPE1	225	2016	18.5870456575312	0	3.26758728366858	4	320.809248034592	11	0	7	5.45	5.09	6.55	5	0.0592285099939809	0.613364479084216	5.82621463896862e-11	2.29941460826379e-11
74	SPE1	226	2016	18.3545658173252	0	1.86032357508274	4	320.809248034592	11	0	7	5.45	5.09	6.55	5	0.0592285099939809	0.613364479084216	5.82621463896862e-11	2.29941460826379e-11
74	SPE1	227	2016	17.9122490427147	0	2.18768471251012	4	320.809248034592	11	0	7	5.45	5.09	6.55	5	0.0592285099939809	0.613364479084216	5.82621463896862e-11	2.29941460826379e-11
74	SPE1	228	2016	17.929994458217	0	2.22314159613578	4	320.809248034592	11	0	7	5.45	5.09	6.55	5	0.0592285099939809	0.613364479084216	5.82621463896862e-11	2.29941460826379e-11
74	SPE1	229	2016	19.0067848256132	0	2.29425565972927	4	320.809248034592	11	0	7	5.45	5.09	6.55	5	0.0592285099939809	0.613364479084216	5.82621463896862e-11	2.29941460826379e-11
74	SPE1	230	2016	19.1017455311918	0	1.81825404910631	4	320.809248034592	11	0	7	5.45	5.09	6.55	5	0.0592285099939809	0.613364479084216	5.82621463896862e-11	2.29941460826379e-11
74	SPE1	231	2016	19.836905603762	0.458249769017222	1.99622592577386	4	320.809248034592	11	0	7	5.45	5.09	6.55	5	0.0592285099939809	0.613364479084216	5.82621463896862e-11	2.29941460826379e-11
74	SPE1	232	2016	19.4601798592853	2.6520914041527	3.31209261884437	4	320.809248034592	11	0	7	5.45	5.09	6.55	5	0.0592285099939809	0.613364479084216	5.82621463896862e-11	2.29941460826379e-11
74	SPE1	233	2016	16.7683913927252	1.70888497283892	4.07365125086091	4	320.809248034592	11	0	7	5.45	5.09	6.55	5	0.0592285099939809	0.613364479084216	5.82621463896862e-11	2.29941460826379e-11
74	SPE1	234	2016	17.4537001770171	1.04621911354527	2.9428744791726	4	320.809248034592	11	0	7	5.45	5.09	6.55	5	0.0592285099939809	0.613364479084216	5.82621463896862e-11	2.29941460826379e-11
74	SPE1	235	2016	21.201707071484	0	1.76377069017526	4	320.809248034592	11	0	7	5.45	5.09	6.55	5	0.0592285099939809	0.613364479084216	5.82621463896862e-11	2.29941460826379e-11
74	SPE1	236	2016	24.6846239844246	0	2.76244332616433	4	320.809248034592	11	0	7	5.45	5.09	6.55	5	0.0592285099939809	0.613364479084216	5.82621463896862e-11	2.29941460826379e-11
74	SPE1	237	2016	27.2795132035653	0	3.05692793781663	4	320.809248034592	11	0	7	5.45	5.09	6.55	5	0.0592285099939809	0.613364479084216	5.82621463896862e-11	2.29941460826379e-11
74	SPE1	238	2016	26.5444677727933	0	2.24312602980863	4	320.809248034592	11	0	7	5.45	5.09	6.55	5	0.0592285099939809	0.613364479084216	5.82621463896862e-11	2.29941460826379e-11
74	SPE1	239	2016	25.3448146725038	3.82729745838228	2.3673702062737	4	320.809248034592	11	0	7	5.45	5.09	6.55	5	0.0592285099939809	0.613364479084216	5.82621463896862e-11	2.29941460826379e-11
74	SPE1	240	2016	23.8860523574039	0	3.38606314527072	4	320.809248034592	11	0	7	5.45	5.09	6.55	5	0.0592285099939809	0.613364479084216	5.82621463896862e-11	2.29941460826379e-11
74	SPE1	241	2016	18.060197342383	1.78936387055594	2.53312714126029	4	320.809248034592	11	0	7	5.45	5.09	6.55	5	0.0592285099939809	0.613364479084216	5.82621463896862e-11	2.29941460826379e-11
74	SPE1	242	2016	17.8506108199716	0	1.56479861823993	4	320.809248034592	11	0	7	5.45	5.09	6.55	5	0.0592285099939809	0.613364479084216	5.82621463896862e-11	2.29941460826379e-11
74	SPE1	243	2016	19.1323007504732	0	1.95131123910716	4	320.809248034592	11	0	7	5.45	5.09	6.55	5	0.0592285099939809	0.613364479084216	5.82621463896862e-11	2.29941460826379e-11
74	SPE1	244	2016	18.7768915233027	0	2.02930629773562	4	320.809248034592	11	0	7	5.45	5.09	6.55	5	0.0592285099939809	0.613364479084216	5.82621463896862e-11	2.29941460826379e-11
74	SPE1	245	2016	18.9119374292846	0	2.15575968141618	4	320.809248034592	11	0	7	5.45	5.09	6.55	5	0.0592285099939809	0.613364479084216	5.82621463896862e-11	2.29941460826379e-11
75	SPE1	246	2016	19.2299085020564	0.594745511806076	2.33614418190936	4	320.809248034592	11	0	7	5.45	5.09	6.55	5	0.0592285099939809	0.613364479084216	5.82621463896862e-11	2.29941460826379e-11
75	SPE1	247	2016	18.8563016086554	10.9656058700985	4.45290132312928	4	320.809248034592	11	0	7	5.45	5.09	6.55	5	0.0592285099939809	0.613364479084216	5.82621463896862e-11	2.29941460826379e-11
75	SPE1	248	2016	17.8536280506529	0	2.96509385296423	4	320.809248034592	11	0	7	5.45	5.09	6.55	5	0.0592285099939809	0.613364479084216	5.82621463896862e-11	2.29941460826379e-11
75	SPE1	249	2016	19.2069716988943	0	1.53219271843716	4	320.809248034592	11	0	7	5.45	5.09	6.55	5	0.0592285099939809	0.613364479084216	5.82621463896862e-11	2.29941460826379e-11
75	SPE1	250	2016	20.4460937138511	0	2.11233677053518	4	320.809248034592	11	0	7	5.45	5.09	6.55	5	0.0592285099939809	0.613364479084216	5.82621463896862e-11	2.29941460826379e-11
75	SPE1	251	2016	22.0495344859094	0	2.82169036778466	4	320.809248034592	11	0	7	5.45	5.09	6.55	5	0.0592285099939809	0.613364479084216	5.82621463896862e-11	2.29941460826379e-11
75	SPE1	252	2016	18.292554934222	0	1.79013302216112	4	320.809248034592	11	0	7	5.45	5.09	6.55	5	0.0592285099939809	0.613364479084216	5.82621463896862e-11	2.29941460826379e-11
75	SPE1	253	2016	19.0138983447691	0	1.50936999513723	4	320.809248034592	11	0	7	5.45	5.09	6.55	5	0.0592285099939809	0.613364479084216	5.82621463896862e-11	2.29941460826379e-11
75	SPE1	254	2016	20.1450817075101	0	1.38709158660233	4	320.809248034592	11	0	7	5.45	5.09	6.55	5	0.0592285099939809	0.613364479084216	5.82621463896862e-11	2.29941460826379e-11
75	SPE1	255	2016	22.6507087754638	0	1.65723359649283	4	320.809248034592	11	0	7	5.45	5.09	6.55	5	0.0592285099939809	0.613364479084216	5.82621463896862e-11	2.29941460826379e-11
75	SPE1	256	2016	24.7530201955991	0	2.14459456060388	4	320.809248034592	11	0	7	5.45	5.09	6.55	5	0.0592285099939809	0.613364479084216	5.82621463896862e-11	2.29941460826379e-11
75	SPE1	257	2016	24.7226880211264	0	2.39349648832523	4	320.809248034592	11	0	7	5.45	5.09	6.55	5	0.0592285099939809	0.613364479084216	5.82621463896862e-11	2.29941460826379e-11
75	SPE1	258	2016	23.2188393704077	4.6065583830248	3.20840570541216	4	320.809248034592	11	0	7	5.45	5.09	6.55	5	0.0592285099939809	0.613364479084216	5.82621463896862e-11	2.29941460826379e-11
75	SPE1	259	2016	18.7295128924027	0	2.56864309367743	4	320.809248034592	11	0	7	5.45	5.09	6.55	5	0.0592285099939809	0.613364479084216	5.82621463896862e-11	2.29941460826379e-11
75	SPE1	260	2016	17.765398803931	0.561316648405045	2.12987065380105	4	320.809248034592	11	0	7	5.45	5.09	6.55	5	0.0592285099939809	0.613364479084216	5.82621463896862e-11	2.29941460826379e-11
75	SPE1	261	2016	16.7998384567225	0	3.07041688671559	4	320.809248034592	11	0	7	5.45	5.09	6.55	5	0.0592285099939809	0.613364479084216	5.82621463896862e-11	2.29941460826379e-11
75	SPE1	262	2016	15.1074212095217	0	1.78427214513242	4	320.809248034592	11	0	7	5.45	5.09	6.55	5	0.0592285099939809	0.613364479084216	5.82621463896862e-11	2.29941460826379e-11
75	SPE1	263	2016	14.9915095360583	0	1.16481610605135	4	320.809248034592	11	0	7	5.45	5.09	6.55	5	0.0592285099939809	0.613364479084216	5.82621463896862e-11	2.29941460826379e-11
75	SPE1	264	2016	15.880525805586	0	1.68712448838303	4	320.809248034592	11	0	7	5.45	5.09	6.55	5	0.0592285099939809	0.613364479084216	5.82621463896862e-11	2.29941460826379e-11
75	SPE1	265	2016	15.288783757371	0	1.52139900125251	4	320.809248034592	11	0	7	5.45	5.09	6.55	5	0.0592285099939809	0.613364479084216	5.82621463896862e-11	2.29941460826379e-11
75	SPE1	266	2016	15.6435457786532	0.0305080258571233	1.6904829988529	4	320.809248034592	11	0	7	5.45	5.09	6.55	5	0.0592285099939809	0.613364479084216	5.82621463896862e-11	2.29941460826379e-11
75	SPE1	267	2016	17.4925029632586	0	2.17930241256582	4	320.809248034592	11	0	7	5.45	5.09	6.55	5	0.0592285099939809	0.613364479084216	5.82621463896862e-11	2.29941460826379e-11
75	SPE1	268	2016	18.9922246464671	0	3.24996782908191	4	320.809248034592	11	0	7	5.45	5.09	6.55	5	0.0592285099939809	0.613364479084216	5.82621463896862e-11	2.29941460826379e-11
75	SPE1	269	2016	15.177422920394	0	1.6007270265199	4	320.809248034592	11	0	7	5.45	5.09	6.55	5	0.0592285099939809	0.613364479084216	5.82621463896862e-11	2.29941460826379e-11
75	SPE1	270	2016	14.9839413703838	0	1.43401427652492	4	320.809248034592	11	0	7	5.45	5.09	6.55	5	0.0592285099939809	0.613364479084216	5.82621463896862e-11	2.29941460826379e-11
75	SPE1	271	2016	18.1988205405707	0	4.21174764393925	4	320.809248034592	11	0	7	5.45	5.09	6.55	5	0.0592285099939809	0.613364479084216	5.82621463896862e-11	2.29941460826379e-11
76	SPE1	272	2016	18.4483356874289	1.90870375051812	5.3458420272277	4	320.809248034592	11	0	7	5.45	5.09	6.55	5	0.0592285099939809	0.613364479084216	5.82621463896862e-11	2.29941460826379e-11
76	SPE1	273	2016	15.1768376218576	0.12074966232023	2.82609643529505	4	320.809248034592	11	0	7	5.45	5.09	6.55	5	0.0592285099939809	0.613364479084216	5.82621463896862e-11	2.29941460826379e-11
76	SPE1	274	2016	14.4441478661191	2.68220136625829	2.14375136611355	4	320.809248034592	11	0	7	5.45	5.09	6.55	5	0.0592285099939809	0.613364479084216	5.82621463896862e-11	2.29941460826379e-11
76	SPE1	275	2016	12.4521124403449	1.20935771596363	4.22112088011006	4	320.809248034592	11	0	7	5.45	5.09	6.55	5	0.0592285099939809	0.613364479084216	5.82621463896862e-11	2.29941460826379e-11
76	SPE1	276	2016	13.9362233559239	3.42029279590801	2.73494949875665	4	320.809248034592	11	0	7	5.45	5.09	6.55	5	0.0592285099939809	0.613364479084216	5.82621463896862e-11	2.29941460826379e-11
76	SPE1	277	2016	13.0008921991392	0	2.97911822665457	4	320.809248034592	11	0	7	5.45	5.09	6.55	5	0.0592285099939809	0.613364479084216	5.82621463896862e-11	2.29941460826379e-11
76	SPE1	278	2016	10.1276992060363	0	3.88204852771807	4	320.809248034592	11	0	7	5.45	5.09	6.55	5	0.0592285099939809	0.613364479084216	5.82621463896862e-11	2.29941460826379e-11
76	SPE1	279	2016	8.95462703805287	0	3.24548768186217	4	320.809248034592	11	0	7	5.45	5.09	6.55	5	0.0592285099939809	0.613364479084216	5.82621463896862e-11	2.29941460826379e-11
76	SPE1	280	2016	12.0040326549731	0.0763302730326585	2.71002898942847	4	320.809248034592	11	0	7	5.45	5.09	6.55	5	0.0592285099939809	0.613364479084216	5.82621463896862e-11	2.29941460826379e-11
76	SPE1	281	2016	9.94425759152581	0	2.25302495942963	4	320.809248034592	11	0	7	5.45	5.09	6.55	5	0.0592285099939809	0.613364479084216	5.82621463896862e-11	2.29941460826379e-11
76	SPE1	282	2016	8.72226047757957	0.104296404351776	1.39023495523144	4	320.809248034592	11	0	7	5.45	5.09	6.55	5	0.0592285099939809	0.613364479084216	5.82621463896862e-11	2.29941460826379e-11
76	SPE1	283	2016	8.79191341894084	0.0266497976796722	1.157488540168	4	320.809248034592	11	0	7	5.45	5.09	6.55	5	0.0592285099939809	0.613364479084216	5.82621463896862e-11	2.29941460826379e-11
76	SPE1	284	2016	7.68540741995731	1.65234505060188	1.56875320728165	4	320.809248034592	11	0	7	5.45	5.09	6.55	5	0.0592285099939809	0.613364479084216	5.82621463896862e-11	2.29941460826379e-11
76	SPE1	285	2016	8.9269546644824	0	2.74166133608625	4	320.809248034592	11	0	7	5.45	5.09	6.55	5	0.0592285099939809	0.613364479084216	5.82621463896862e-11	2.29941460826379e-11
76	SPE1	286	2016	9.18623325881498	0	4.45542869922745	4	320.809248034592	11	0	7	5.45	5.09	6.55	5	0.0592285099939809	0.613364479084216	5.82621463896862e-11	2.29941460826379e-11
76	SPE1	287	2016	10.3800323898019	1.17453672039339	3.70711002724255	4	320.809248034592	11	0	7	5.45	5.09	6.55	5	0.0592285099939809	0.613364479084216	5.82621463896862e-11	2.29941460826379e-11
76	SPE1	288	2016	11.8818506605308	0.428716715454895	3.00609727687211	4	320.809248034592	11	0	7	5.45	5.09	6.55	5	0.0592285099939809	0.613364479084216	5.82621463896862e-11	2.29941460826379e-11
76	SPE1	289	2016	13.7091713987265	0	2.60338647391461	4	320.809248034592	11	0	7	5.45	5.09	6.55	5	0.0592285099939809	0.613364479084216	5.82621463896862e-11	2.29941460826379e-11
76	SPE1	290	2016	13.0259039267013	0	2.20141579694782	4	320.809248034592	11	0	7	5.45	5.09	6.55	5	0.0592285099939809	0.613364479084216	5.82621463896862e-11	2.29941460826379e-11
76	SPE1	291	2016	11.3386467621058	5.07385562477177	3.17760850135312	4	320.809248034592	11	0	7	5.45	5.09	6.55	5	0.0592285099939809	0.613364479084216	5.82621463896862e-11	2.29941460826379e-11
76	SPE1	292	2016	8.62406534400615	13.9903993588633	4.32693377429979	4	320.809248034592	11	0	7	5.45	5.09	6.55	5	0.0592285099939809	0.613364479084216	5.82621463896862e-11	2.29941460826379e-11
76	SPE1	293	2016	7.78073850445279	3.37919244561517	1.85191320046307	4	320.809248034592	11	0	7	5.45	5.09	6.55	5	0.0592285099939809	0.613364479084216	5.82621463896862e-11	2.29941460826379e-11
76	SPE1	294	2016	7.83772058194641	4.09195133109682	2.28605393779579	4	320.809248034592	11	0	7	5.45	5.09	6.55	5	0.0592285099939809	0.613364479084216	5.82621463896862e-11	2.29941460826379e-11
76	SPE1	295	2016	7.91794123946227	0	1.74154209322141	4	320.809248034592	11	0	7	5.45	5.09	6.55	5	0.0592285099939809	0.613364479084216	5.82621463896862e-11	2.29941460826379e-11
76	SPE1	296	2016	4.54030363511493	0	1.74732302153312	4	320.809248034592	11	0	7	5.45	5.09	6.55	5	0.0592285099939809	0.613364479084216	5.82621463896862e-11	2.29941460826379e-11
76	SPE1	297	2016	8.72502232911041	4.21960538247005	1.78631612108942	4	320.809248034592	11	0	7	5.45	5.09	6.55	5	0.0592285099939809	0.613364479084216	5.82621463896862e-11	2.29941460826379e-11
76	SPE1	298	2016	9.45789050985008	0	1.62733415800568	4	320.809248034592	11	0	7	5.45	5.09	6.55	5	0.0592285099939809	0.613364479084216	5.82621463896862e-11	2.29941460826379e-11
76	SPE1	299	2016	9.8547632679711	0	1.13475240349434	4	320.809248034592	11	0	7	5.45	5.09	6.55	5	0.0592285099939809	0.613364479084216	5.82621463896862e-11	2.29941460826379e-11
76	SPE1	300	2016	11.1405657941485	0	2.44778789167383	4	320.809248034592	11	0	7	5.45	5.09	6.55	5	0.0592285099939809	0.613364479084216	5.82621463896862e-11	2.29941460826379e-11
76	SPE1	301	2016	12.4147324765259	0.109930758608458	3.34779756461723	4	320.809248034592	11	0	7	5.45	5.09	6.55	5	0.0592285099939809	0.613364479084216	5.82621463896862e-11	2.29941460826379e-11
76	SPE1	302	2016	11.0717072396828	0	2.10572717856543	4	320.809248034592	11	0	7	5.45	5.09	6.55	5	0.0592285099939809	0.613364479084216	5.82621463896862e-11	2.29941460826379e-11
76	SPE1	303	2016	9.63393127111288	0	1.36096141102812	4	320.809248034592	11	0	7	5.45	5.09	6.55	5	0.0592285099939809	0.613364479084216	5.82621463896862e-11	2.29941460826379e-11
77	NIE1	142	1994	14.3720337125326	0.516725948699277	3.72849942184615	23	339.467022742444	157	0	5.66	4.93	5.42	6.14	3.98	0.287496572200248	0.42007799442575	0.00305523940227145	0.00995835592575507
77	NIE1	143	1994	15.1119995591664	0	1.94213426425847	23	339.467022742444	157	0	5.66	4.93	5.42	6.14	3.98	0.287496572200248	0.42007799442575	0.00305523940227145	0.00995835592575507
77	NIE1	144	1994	15.6545615970069	0.923959319243325	1.24200589156557	23	339.467022742444	157	0	5.66	4.93	5.42	6.14	3.98	0.287496572200248	0.42007799442575	0.00305523940227145	0.00995835592575507
77	NIE1	145	1994	13.3112191949738	2.21025187452216	2.41780629622157	23	339.467022742444	157	0	5.66	4.93	5.42	6.14	3.98	0.287496572200248	0.42007799442575	0.00305523940227145	0.00995835592575507
77	NIE1	146	1994	12.2204644615212	6.58205190108067	1.4037066792614	23	339.467022742444	157	0	5.66	4.93	5.42	6.14	3.98	0.287496572200248	0.42007799442575	0.00305523940227145	0.00995835592575507
77	NIE1	147	1994	10.8799703859743	0	2.35815428176631	23	339.467022742444	157	0	5.66	4.93	5.42	6.14	3.98	0.287496572200248	0.42007799442575	0.00305523940227145	0.00995835592575507
78	NIE1	148	1994	12.2415404771755	0	1.05187960057163	23	339.467022742444	157	0	5.66	4.93	5.42	6.14	3.98	0.287496572200248	0.42007799442575	0.00305523940227145	0.00995835592575507
78	NIE1	149	1994	10.655599157513	0	1.95696638106519	23	339.467022742444	157	0	5.66	4.93	5.42	6.14	3.98	0.287496572200248	0.42007799442575	0.00305523940227145	0.00995835592575507
78	NIE1	150	1994	10.2356188911713	0	1.74477754641234	23	339.467022742444	157	0	5.66	4.93	5.42	6.14	3.98	0.287496572200248	0.42007799442575	0.00305523940227145	0.00995835592575507
78	NIE1	151	1994	14.3147181598023	0	1.80106603694662	23	339.467022742444	157	0	5.66	4.93	5.42	6.14	3.98	0.287496572200248	0.42007799442575	0.00305523940227145	0.00995835592575507
78	NIE1	152	1994	20.3499592407543	1.87389559109072	2.25990081495049	23	339.467022742444	157	0	5.66	4.93	5.42	6.14	3.98	0.287496572200248	0.42007799442575	0.00305523940227145	0.00995835592575507
78	NIE1	153	1994	15.4603327289732	12.2392635609543	3.21561436127517	23	339.467022742444	157	0	5.66	4.93	5.42	6.14	3.98	0.287496572200248	0.42007799442575	0.00305523940227145	0.00995835592575507
78	NIE1	154	1994	14.2640992076882	5.36085104346426	5.01665741679588	23	339.467022742444	157	0	5.66	4.93	5.42	6.14	3.98	0.287496572200248	0.42007799442575	0.00305523940227145	0.00995835592575507
79	NIE1	155	1994	11.6246819855392	19.8654336543901	5.01149178473307	23	339.467022742444	157	0	5.66	4.93	5.42	6.14	3.98	0.287496572200248	0.42007799442575	0.00305523940227145	0.00995835592575507
79	NIE1	156	1994	11.4280448608519	0.625497516746326	4.38886296455842	23	339.467022742444	157	0	5.66	4.93	5.42	6.14	3.98	0.287496572200248	0.42007799442575	0.00305523940227145	0.00995835592575507
79	NIE1	157	1994	13.0155141269073	2.21581137445597	3.04239882818736	23	339.467022742444	157	0	5.66	4.93	5.42	6.14	3.98	0.287496572200248	0.42007799442575	0.00305523940227145	0.00995835592575507
79	NIE1	158	1994	13.6114740839909	0	2.63310463476691	23	339.467022742444	157	0	5.66	4.93	5.42	6.14	3.98	0.287496572200248	0.42007799442575	0.00305523940227145	0.00995835592575507
79	NIE1	159	1994	13.1908536019251	1.66537244063897	2.12998532069833	23	339.467022742444	157	0	5.66	4.93	5.42	6.14	3.98	0.287496572200248	0.42007799442575	0.00305523940227145	0.00995835592575507
79	NIE1	160	1994	11.7109257666961	5.14527573632702	3.63086742925972	23	339.467022742444	157	0	5.66	4.93	5.42	6.14	3.98	0.287496572200248	0.42007799442575	0.00305523940227145	0.00995835592575507
79	NIE1	161	1994	11.3973626846223	4.68920174477141	2.82112921397708	23	339.467022742444	157	0	5.66	4.93	5.42	6.14	3.98	0.287496572200248	0.42007799442575	0.00305523940227145	0.00995835592575507
80	NIE1	162	1994	12.0391504180685	0	2.03454022452787	23	339.467022742444	157	0	5.66	4.93	5.42	6.14	3.98	0.287496572200248	0.42007799442575	0.00305523940227145	0.00995835592575507
80	NIE1	163	1994	14.9849525616184	0	2.25382158678164	23	339.467022742444	157	0	5.66	4.93	5.42	6.14	3.98	0.287496572200248	0.42007799442575	0.00305523940227145	0.00995835592575507
80	NIE1	164	1994	15.5089126733723	0	2.10240858803076	23	339.467022742444	157	0	5.66	4.93	5.42	6.14	3.98	0.287496572200248	0.42007799442575	0.00305523940227145	0.00995835592575507
80	NIE1	165	1994	17.6043735621289	0	2.00007697188481	23	339.467022742444	157	0	5.66	4.93	5.42	6.14	3.98	0.287496572200248	0.42007799442575	0.00305523940227145	0.00995835592575507
80	NIE1	166	1994	14.0964032934287	0	2.80962735991363	23	339.467022742444	157	0	5.66	4.93	5.42	6.14	3.98	0.287496572200248	0.42007799442575	0.00305523940227145	0.00995835592575507
80	NIE1	167	1994	12.9518903806926	2.68876813965049	3.3871257785643	23	339.467022742444	157	0	5.66	4.93	5.42	6.14	3.98	0.287496572200248	0.42007799442575	0.00305523940227145	0.00995835592575507
80	NIE1	168	1994	13.4733022572066	0.126672925587755	1.86703024905002	23	339.467022742444	157	0	5.66	4.93	5.42	6.14	3.98	0.287496572200248	0.42007799442575	0.00305523940227145	0.00995835592575507
81	NIE1	169	1994	18.798000837575	0	3.77575828728999	23	339.467022742444	157	0	5.66	4.93	5.42	6.14	3.98	0.287496572200248	0.42007799442575	0.00305523940227145	0.00995835592575507
81	NIE1	170	1994	18.3439126865367	0	3.80008411246829	23	339.467022742444	157	0	5.66	4.93	5.42	6.14	3.98	0.287496572200248	0.42007799442575	0.00305523940227145	0.00995835592575507
81	NIE1	171	1994	16.473312555171	0	1.74876803833173	23	339.467022742444	157	0	5.66	4.93	5.42	6.14	3.98	0.287496572200248	0.42007799442575	0.00305523940227145	0.00995835592575507
81	NIE1	172	1994	18.9286425153676	0.00151987382809882	3.24237812526018	23	339.467022742444	157	0	5.66	4.93	5.42	6.14	3.98	0.287496572200248	0.42007799442575	0.00305523940227145	0.00995835592575507
81	NIE1	173	1994	18.2608258499733	0.2753040144838	5.0803518146907	23	339.467022742444	157	0	5.66	4.93	5.42	6.14	3.98	0.287496572200248	0.42007799442575	0.00305523940227145	0.00995835592575507
81	NIE1	174	1994	16.6145938816917	0	2.07381025601653	23	339.467022742444	157	0	5.66	4.93	5.42	6.14	3.98	0.287496572200248	0.42007799442575	0.00305523940227145	0.00995835592575507
81	NIE1	175	1994	22.5167324002277	0	2.80261546094459	23	339.467022742444	157	0	5.66	4.93	5.42	6.14	3.98	0.287496572200248	0.42007799442575	0.00305523940227145	0.00995835592575507
82	NIE1	176	1994	22.3699100492124	0	3.4827136232244	23	339.467022742444	157	0	5.66	4.93	5.42	6.14	3.98	0.287496572200248	0.42007799442575	0.00305523940227145	0.00995835592575507
82	NIE1	177	1994	21.9619347439151	0	1.55376335369144	23	339.467022742444	157	0	5.66	4.93	5.42	6.14	3.98	0.287496572200248	0.42007799442575	0.00305523940227145	0.00995835592575507
82	NIE1	178	1994	20.8710209776504	0	1.89560103840842	23	339.467022742444	157	0	5.66	4.93	5.42	6.14	3.98	0.287496572200248	0.42007799442575	0.00305523940227145	0.00995835592575507
82	NIE1	179	1994	26.1160488065886	0.376349841356341	1.63583831376662	23	339.467022742444	157	0	5.66	4.93	5.42	6.14	3.98	0.287496572200248	0.42007799442575	0.00305523940227145	0.00995835592575507
82	NIE1	180	1994	21.334064235652	0	3.08912955165661	23	339.467022742444	157	0	5.66	4.93	5.42	6.14	3.98	0.287496572200248	0.42007799442575	0.00305523940227145	0.00995835592575507
82	NIE1	181	1994	19.7986302773835	0	1.99227342874642	23	339.467022742444	157	0	5.66	4.93	5.42	6.14	3.98	0.287496572200248	0.42007799442575	0.00305523940227145	0.00995835592575507
82	NIE1	182	1994	22.471868704808	0	2.12458222714381	23	339.467022742444	157	0	5.66	4.93	5.42	6.14	3.98	0.287496572200248	0.42007799442575	0.00305523940227145	0.00995835592575507
83	NIE1	183	1994	25.9795064525591	0	2.19524096319521	23	339.467022742444	157	0	5.66	4.93	5.42	6.14	3.98	0.287496572200248	0.42007799442575	0.00305523940227145	0.00995835592575507
83	NIE1	184	1994	26.353492049083	0	1.5319756006486	23	339.467022742444	157	0	5.66	4.93	5.42	6.14	3.98	0.287496572200248	0.42007799442575	0.00305523940227145	0.00995835592575507
83	NIE1	185	1994	22.5329803888259	26.8682862596803	1.96395916039632	23	339.467022742444	157	0	5.66	4.93	5.42	6.14	3.98	0.287496572200248	0.42007799442575	0.00305523940227145	0.00995835592575507
83	NIE1	186	1994	17.981629665059	0	2.17721389861891	23	339.467022742444	157	0	5.66	4.93	5.42	6.14	3.98	0.287496572200248	0.42007799442575	0.00305523940227145	0.00995835592575507
83	NIE1	187	1994	19.3092330057603	0.49387848359397	1.49630243540022	23	339.467022742444	157	0	5.66	4.93	5.42	6.14	3.98	0.287496572200248	0.42007799442575	0.00305523940227145	0.00995835592575507
83	NIE1	188	1994	15.4082645144569	1.83906120604055	2.97833963710842	23	339.467022742444	157	0	5.66	4.93	5.42	6.14	3.98	0.287496572200248	0.42007799442575	0.00305523940227145	0.00995835592575507
83	NIE1	189	1994	18.3157157164266	0	2.37043451290284	23	339.467022742444	157	0	5.66	4.93	5.42	6.14	3.98	0.287496572200248	0.42007799442575	0.00305523940227145	0.00995835592575507
84	NIE1	190	1994	17.709461624738	0	1.84493029445451	23	339.467022742444	157	0	5.66	4.93	5.42	6.14	3.98	0.287496572200248	0.42007799442575	0.00305523940227145	0.00995835592575507
84	NIE1	191	1994	20.354612954086	0	1.23975094770702	23	339.467022742444	157	0	5.66	4.93	5.42	6.14	3.98	0.287496572200248	0.42007799442575	0.00305523940227145	0.00995835592575507
84	NIE1	192	1994	23.5606766891809	0	2.26158173966944	23	339.467022742444	157	0	5.66	4.93	5.42	6.14	3.98	0.287496572200248	0.42007799442575	0.00305523940227145	0.00995835592575507
84	NIE1	193	1994	25.7368375667412	0	2.91997240549707	23	339.467022742444	157	0	5.66	4.93	5.42	6.14	3.98	0.287496572200248	0.42007799442575	0.00305523940227145	0.00995835592575507
84	NIE1	194	1994	26.3637229385649	12.7111270145432	1.88882568893771	23	339.467022742444	157	0	5.66	4.93	5.42	6.14	3.98	0.287496572200248	0.42007799442575	0.00305523940227145	0.00995835592575507
84	NIE1	195	1994	22.1249577169707	0.214415031671953	1.66698702289573	23	339.467022742444	157	0	5.66	4.93	5.42	6.14	3.98	0.287496572200248	0.42007799442575	0.00305523940227145	0.00995835592575507
84	NIE1	196	1994	21.6939074817929	0	1.49507574750236	23	339.467022742444	157	0	5.66	4.93	5.42	6.14	3.98	0.287496572200248	0.42007799442575	0.00305523940227145	0.00995835592575507
85	NIE1	197	1994	22.3996658805783	0	1.50220028911406	23	339.467022742444	157	0	5.66	4.93	5.42	6.14	3.98	0.287496572200248	0.42007799442575	0.00305523940227145	0.00995835592575507
85	NIE1	198	1994	21.4232785688826	0	2.13607573401002	23	339.467022742444	157	0	5.66	4.93	5.42	6.14	3.98	0.287496572200248	0.42007799442575	0.00305523940227145	0.00995835592575507
85	NIE1	199	1994	21.026432295736	0	2.18256444690828	23	339.467022742444	157	0	5.66	4.93	5.42	6.14	3.98	0.287496572200248	0.42007799442575	0.00305523940227145	0.00995835592575507
85	NIE1	200	1994	22.0446277736762	0	2.58086060696685	23	339.467022742444	157	0	5.66	4.93	5.42	6.14	3.98	0.287496572200248	0.42007799442575	0.00305523940227145	0.00995835592575507
85	NIE1	201	1994	20.5966313359937	0	2.041046840027	23	339.467022742444	157	0	5.66	4.93	5.42	6.14	3.98	0.287496572200248	0.42007799442575	0.00305523940227145	0.00995835592575507
85	NIE1	202	1994	23.8340151153023	0	1.35665026650065	23	339.467022742444	157	0	5.66	4.93	5.42	6.14	3.98	0.287496572200248	0.42007799442575	0.00305523940227145	0.00995835592575507
85	NIE1	203	1994	24.5889606286594	0.104931554074017	1.37477045194375	23	339.467022742444	157	0	5.66	4.93	5.42	6.14	3.98	0.287496572200248	0.42007799442575	0.00305523940227145	0.00995835592575507
86	NIE1	204	1994	25.639771898169	0	1.94466723079717	23	339.467022742444	157	0	5.66	4.93	5.42	6.14	3.98	0.287496572200248	0.42007799442575	0.00305523940227145	0.00995835592575507
86	NIE1	205	1994	27.6017948324057	0.903094703454608	2.28830508226031	23	339.467022742444	157	0	5.66	4.93	5.42	6.14	3.98	0.287496572200248	0.42007799442575	0.00305523940227145	0.00995835592575507
86	NIE1	206	1994	23.2578447734723	9.14912369334988	1.94009918625042	23	339.467022742444	157	0	5.66	4.93	5.42	6.14	3.98	0.287496572200248	0.42007799442575	0.00305523940227145	0.00995835592575507
86	NIE1	207	1994	24.7625886986303	1.66198309851688	1.21700216556535	23	339.467022742444	157	0	5.66	4.93	5.42	6.14	3.98	0.287496572200248	0.42007799442575	0.00305523940227145	0.00995835592575507
86	NIE1	208	1994	26.8105060311073	0.0700918574893938	1.50584136037257	23	339.467022742444	157	0	5.66	4.93	5.42	6.14	3.98	0.287496572200248	0.42007799442575	0.00305523940227145	0.00995835592575507
86	NIE1	209	1994	24.0774354257817	0	2.60146871939656	23	339.467022742444	157	0	5.66	4.93	5.42	6.14	3.98	0.287496572200248	0.42007799442575	0.00305523940227145	0.00995835592575507
86	NIE1	210	1994	21.2405777171868	0	1.72276637182131	23	339.467022742444	157	0	5.66	4.93	5.42	6.14	3.98	0.287496572200248	0.42007799442575	0.00305523940227145	0.00995835592575507
87	NIE1	211	1994	25.670850686848	0	1.64305492844612	23	339.467022742444	157	0	5.66	4.93	5.42	6.14	3.98	0.287496572200248	0.42007799442575	0.00305523940227145	0.00995835592575507
87	NIE1	212	1994	26.1223666874984	0.734019383050818	2.68433764301413	23	339.467022742444	157	0	5.66	4.93	5.42	6.14	3.98	0.287496572200248	0.42007799442575	0.00305523940227145	0.00995835592575507
87	NIE1	213	1994	21.5100523541274	0.104406178893321	2.25096147099146	23	339.467022742444	157	0	5.66	4.93	5.42	6.14	3.98	0.287496572200248	0.42007799442575	0.00305523940227145	0.00995835592575507
87	NIE1	214	1994	21.1464687418672	0	1.54709499731128	23	339.467022742444	157	0	5.66	4.93	5.42	6.14	3.98	0.287496572200248	0.42007799442575	0.00305523940227145	0.00995835592575507
87	NIE1	215	1994	25.4764894563966	0	1.36509269260458	23	339.467022742444	157	0	5.66	4.93	5.42	6.14	3.98	0.287496572200248	0.42007799442575	0.00305523940227145	0.00995835592575507
87	NIE1	216	1994	29.091675556483	0.122563801997798	2.42874841178549	23	339.467022742444	157	0	5.66	4.93	5.42	6.14	3.98	0.287496572200248	0.42007799442575	0.00305523940227145	0.00995835592575507
87	NIE1	217	1994	23.2840608032622	0.914526630258988	2.13501135533461	23	339.467022742444	157	0	5.66	4.93	5.42	6.14	3.98	0.287496572200248	0.42007799442575	0.00305523940227145	0.00995835592575507
88	NIE1	218	1994	22.1585622383063	0	1.80575204347787	23	339.467022742444	157	0	5.66	4.93	5.42	6.14	3.98	0.287496572200248	0.42007799442575	0.00305523940227145	0.00995835592575507
88	NIE1	219	1994	19.9365654361701	0	2.18964138731036	23	339.467022742444	157	0	5.66	4.93	5.42	6.14	3.98	0.287496572200248	0.42007799442575	0.00305523940227145	0.00995835592575507
88	NIE1	220	1994	19.6061405478166	0	1.95284424579541	23	339.467022742444	157	0	5.66	4.93	5.42	6.14	3.98	0.287496572200248	0.42007799442575	0.00305523940227145	0.00995835592575507
88	NIE1	221	1994	20.8255223489062	6.58190783188742	2.09275686068754	23	339.467022742444	157	0	5.66	4.93	5.42	6.14	3.98	0.287496572200248	0.42007799442575	0.00305523940227145	0.00995835592575507
88	NIE1	222	1994	19.6673988007778	6.2351141453688	2.30572646918939	23	339.467022742444	157	0	5.66	4.93	5.42	6.14	3.98	0.287496572200248	0.42007799442575	0.00305523940227145	0.00995835592575507
88	NIE1	223	1994	18.8107547708247	0.130423622090024	3.1850587971592	23	339.467022742444	157	0	5.66	4.93	5.42	6.14	3.98	0.287496572200248	0.42007799442575	0.00305523940227145	0.00995835592575507
88	NIE1	224	1994	17.1004710353372	0.819508077482333	3.47047751083957	23	339.467022742444	157	0	5.66	4.93	5.42	6.14	3.98	0.287496572200248	0.42007799442575	0.00305523940227145	0.00995835592575507
89	NIE1	225	1994	14.8547490456735	0.123352677779187	4.05200976090348	23	339.467022742444	157	0	5.66	4.93	5.42	6.14	3.98	0.287496572200248	0.42007799442575	0.00305523940227145	0.00995835592575507
89	NIE1	226	1994	12.9884144106471	1.54494503100402	3.14356666298676	23	339.467022742444	157	0	5.66	4.93	5.42	6.14	3.98	0.287496572200248	0.42007799442575	0.00305523940227145	0.00995835592575507
89	NIE1	227	1994	13.6360393346076	0	2.18845653926629	23	339.467022742444	157	0	5.66	4.93	5.42	6.14	3.98	0.287496572200248	0.42007799442575	0.00305523940227145	0.00995835592575507
89	NIE1	228	1994	17.3271288769475	0.415345470697878	1.71118152687316	23	339.467022742444	157	0	5.66	4.93	5.42	6.14	3.98	0.287496572200248	0.42007799442575	0.00305523940227145	0.00995835592575507
89	NIE1	229	1994	14.1963641102441	10.1641082408061	3.83421296637224	23	339.467022742444	157	0	5.66	4.93	5.42	6.14	3.98	0.287496572200248	0.42007799442575	0.00305523940227145	0.00995835592575507
89	NIE1	230	1994	14.852826056107	0.616923401190021	5.34194000812578	23	339.467022742444	157	0	5.66	4.93	5.42	6.14	3.98	0.287496572200248	0.42007799442575	0.00305523940227145	0.00995835592575507
89	NIE1	231	1994	16.4116159716848	7.65191466053239	3.76701294532531	23	339.467022742444	157	0	5.66	4.93	5.42	6.14	3.98	0.287496572200248	0.42007799442575	0.00305523940227145	0.00995835592575507
90	NIE1	232	1994	16.4913937718871	0	2.68512066476956	23	339.467022742444	157	0	5.66	4.93	5.42	6.14	3.98	0.287496572200248	0.42007799442575	0.00305523940227145	0.00995835592575507
90	NIE1	233	1994	17.5803761889798	0	1.13991958724372	23	339.467022742444	157	0	5.66	4.93	5.42	6.14	3.98	0.287496572200248	0.42007799442575	0.00305523940227145	0.00995835592575507
90	NIE1	234	1994	20.5459388935801	1.78926077067088	1.87802210639876	23	339.467022742444	157	0	5.66	4.93	5.42	6.14	3.98	0.287496572200248	0.42007799442575	0.00305523940227145	0.00995835592575507
90	NIE1	235	1994	21.085491999908	15.7652120969856	2.00290821910949	23	339.467022742444	157	0	5.66	4.93	5.42	6.14	3.98	0.287496572200248	0.42007799442575	0.00305523940227145	0.00995835592575507
90	NIE1	236	1994	17.2190598675616	0.105897011191942	2.21198406975445	23	339.467022742444	157	0	5.66	4.93	5.42	6.14	3.98	0.287496572200248	0.42007799442575	0.00305523940227145	0.00995835592575507
90	NIE1	237	1994	17.0597612624569	0.423692546972888	1.35071484732771	23	339.467022742444	157	0	5.66	4.93	5.42	6.14	3.98	0.287496572200248	0.42007799442575	0.00305523940227145	0.00995835592575507
90	NIE1	238	1994	18.6413004235336	0.00569290263689171	2.74926616592806	23	339.467022742444	157	0	5.66	4.93	5.42	6.14	3.98	0.287496572200248	0.42007799442575	0.00305523940227145	0.00995835592575507
91	NIE1	239	1994	17.388834410702	6.36326486237724	3.52235644334201	23	339.467022742444	157	0	5.66	4.93	5.42	6.14	3.98	0.287496572200248	0.42007799442575	0.00305523940227145	0.00995835592575507
91	NIE1	240	1994	14.8588949740356	0	3.8666061937196	23	339.467022742444	157	0	5.66	4.93	5.42	6.14	3.98	0.287496572200248	0.42007799442575	0.00305523940227145	0.00995835592575507
91	NIE1	241	1994	15.4828857128478	0	3.72392929133641	23	339.467022742444	157	0	5.66	4.93	5.42	6.14	3.98	0.287496572200248	0.42007799442575	0.00305523940227145	0.00995835592575507
91	NIE1	242	1994	14.032812548239	0	1.25761301298116	23	339.467022742444	157	0	5.66	4.93	5.42	6.14	3.98	0.287496572200248	0.42007799442575	0.00305523940227145	0.00995835592575507
91	NIE1	243	1994	19.221906916436	1.09310677076866	2.36828349541394	23	339.467022742444	157	0	5.66	4.93	5.42	6.14	3.98	0.287496572200248	0.42007799442575	0.00305523940227145	0.00995835592575507
91	NIE1	244	1994	17.9732197163796	0.0274016027048511	3.78324112322099	23	339.467022742444	157	0	5.66	4.93	5.42	6.14	3.98	0.287496572200248	0.42007799442575	0.00305523940227145	0.00995835592575507
91	NIE1	245	1994	13.8680216545784	2.72559277433686	2.58725845781793	23	339.467022742444	157	0	5.66	4.93	5.42	6.14	3.98	0.287496572200248	0.42007799442575	0.00305523940227145	0.00995835592575507
92	NIE1	246	1994	15.1246444017258	0.549325954065347	3.31550634712121	23	339.467022742444	157	0	5.66	4.93	5.42	6.14	3.98	0.287496572200248	0.42007799442575	0.00305523940227145	0.00995835592575507
92	NIE1	247	1994	17.0976851515388	2.21471125225201	3.02683068721854	23	339.467022742444	157	0	5.66	4.93	5.42	6.14	3.98	0.287496572200248	0.42007799442575	0.00305523940227145	0.00995835592575507
92	NIE1	248	1994	14.6674250288662	1.24249413042746	3.37818669829145	23	339.467022742444	157	0	5.66	4.93	5.42	6.14	3.98	0.287496572200248	0.42007799442575	0.00305523940227145	0.00995835592575507
92	NIE1	249	1994	13.5909493345486	6.10336613030474	2.05731820293647	23	339.467022742444	157	0	5.66	4.93	5.42	6.14	3.98	0.287496572200248	0.42007799442575	0.00305523940227145	0.00995835592575507
92	NIE1	250	1994	13.4122300091677	3.37451415469987	2.32959053037213	23	339.467022742444	157	0	5.66	4.93	5.42	6.14	3.98	0.287496572200248	0.42007799442575	0.00305523940227145	0.00995835592575507
92	NIE1	251	1994	14.0478470491794	11.4589740281553	3.0205880890152	23	339.467022742444	157	0	5.66	4.93	5.42	6.14	3.98	0.287496572200248	0.42007799442575	0.00305523940227145	0.00995835592575507
92	NIE1	252	1994	13.498439665607	0	5.45027083719198	23	339.467022742444	157	0	5.66	4.93	5.42	6.14	3.98	0.287496572200248	0.42007799442575	0.00305523940227145	0.00995835592575507
93	NIE1	253	1994	13.3050902011877	6.79827272871009	4.87333686032501	23	339.467022742444	157	0	5.66	4.93	5.42	6.14	3.98	0.287496572200248	0.42007799442575	0.00305523940227145	0.00995835592575507
93	NIE1	254	1994	13.8027058532179	2.29192414717949	3.75943997670165	23	339.467022742444	157	0	5.66	4.93	5.42	6.14	3.98	0.287496572200248	0.42007799442575	0.00305523940227145	0.00995835592575507
93	NIE1	255	1994	15.7341350524716	6.91676216472166	3.95376383920003	23	339.467022742444	157	0	5.66	4.93	5.42	6.14	3.98	0.287496572200248	0.42007799442575	0.00305523940227145	0.00995835592575507
93	NIE1	256	1994	13.9090308796731	0	2.79312514180323	23	339.467022742444	157	0	5.66	4.93	5.42	6.14	3.98	0.287496572200248	0.42007799442575	0.00305523940227145	0.00995835592575507
93	NIE1	257	1994	13.5746917196891	10.5591638216657	2.53482467538924	23	339.467022742444	157	0	5.66	4.93	5.42	6.14	3.98	0.287496572200248	0.42007799442575	0.00305523940227145	0.00995835592575507
93	NIE1	258	1994	12.355693768438	6.5459180089733	5.90805918901867	23	339.467022742444	157	0	5.66	4.93	5.42	6.14	3.98	0.287496572200248	0.42007799442575	0.00305523940227145	0.00995835592575507
93	NIE1	259	1994	10.8537122877888	5.29586947494951	6.14153919629214	23	339.467022742444	157	0	5.66	4.93	5.42	6.14	3.98	0.287496572200248	0.42007799442575	0.00305523940227145	0.00995835592575507
94	NIE1	260	1994	10.8846412348009	7.94991102783946	5.094982551176	23	339.467022742444	157	0	5.66	4.93	5.42	6.14	3.98	0.287496572200248	0.42007799442575	0.00305523940227145	0.00995835592575507
94	NIE1	261	1994	11.8754286196364	6.12678521624908	2.17136464338537	23	339.467022742444	157	0	5.66	4.93	5.42	6.14	3.98	0.287496572200248	0.42007799442575	0.00305523940227145	0.00995835592575507
94	NIE1	262	1994	12.7597018490519	2.18755620457302	1.22196236540941	23	339.467022742444	157	0	5.66	4.93	5.42	6.14	3.98	0.287496572200248	0.42007799442575	0.00305523940227145	0.00995835592575507
94	NIE1	263	1994	12.7924770906409	1.26565672725169	2.97197247709368	23	339.467022742444	157	0	5.66	4.93	5.42	6.14	3.98	0.287496572200248	0.42007799442575	0.00305523940227145	0.00995835592575507
94	NIE1	264	1994	13.9362132622894	0	2.65780697921859	23	339.467022742444	157	0	5.66	4.93	5.42	6.14	3.98	0.287496572200248	0.42007799442575	0.00305523940227145	0.00995835592575507
94	NIE1	265	1994	13.3332540323957	0	2.45070425228778	23	339.467022742444	157	0	5.66	4.93	5.42	6.14	3.98	0.287496572200248	0.42007799442575	0.00305523940227145	0.00995835592575507
94	NIE1	266	1994	15.3279262122576	0	2.68700270921099	23	339.467022742444	157	0	5.66	4.93	5.42	6.14	3.98	0.287496572200248	0.42007799442575	0.00305523940227145	0.00995835592575507
95	NIE1	267	1994	15.8916490001093	1.14958631651928	2.45156229544537	23	339.467022742444	157	0	5.66	4.93	5.42	6.14	3.98	0.287496572200248	0.42007799442575	0.00305523940227145	0.00995835592575507
95	NIE1	268	1994	15.8512000380651	0.904312498046357	1.55214301372157	23	339.467022742444	157	0	5.66	4.93	5.42	6.14	3.98	0.287496572200248	0.42007799442575	0.00305523940227145	0.00995835592575507
95	NIE1	269	1994	15.3218812092588	0	1.1628210996609	23	339.467022742444	157	0	5.66	4.93	5.42	6.14	3.98	0.287496572200248	0.42007799442575	0.00305523940227145	0.00995835592575507
95	NIE1	270	1994	14.2240366102438	0.617138909496537	2.19602447587121	23	339.467022742444	157	0	5.66	4.93	5.42	6.14	3.98	0.287496572200248	0.42007799442575	0.00305523940227145	0.00995835592575507
95	NIE1	271	1994	13.696827032578	0	1.83339883025991	23	339.467022742444	157	0	5.66	4.93	5.42	6.14	3.98	0.287496572200248	0.42007799442575	0.00305523940227145	0.00995835592575507
95	NIE1	272	1994	13.6447773773599	0	2.05369788839923	23	339.467022742444	157	0	5.66	4.93	5.42	6.14	3.98	0.287496572200248	0.42007799442575	0.00305523940227145	0.00995835592575507
95	NIE1	273	1994	13.0260329895922	0	1.04904933178203	23	339.467022742444	157	0	5.66	4.93	5.42	6.14	3.98	0.287496572200248	0.42007799442575	0.00305523940227145	0.00995835592575507
95	NIE1	274	1994	13.3917950863289	0.793982421551779	1.46797831223507	23	339.467022742444	157	0	5.66	4.93	5.42	6.14	3.98	0.287496572200248	0.42007799442575	0.00305523940227145	0.00995835592575507
95	NIE1	275	1994	13.8880051350233	4.7388080525141	1.52981995374097	23	339.467022742444	157	0	5.66	4.93	5.42	6.14	3.98	0.287496572200248	0.42007799442575	0.00305523940227145	0.00995835592575507
95	NIE1	276	1994	10.2053488268903	19.8851859837518	4.01688173998186	23	339.467022742444	157	0	5.66	4.93	5.42	6.14	3.98	0.287496572200248	0.42007799442575	0.00305523940227145	0.00995835592575507
95	NIE1	277	1994	5.0188049412827	1.26839013072986	2.81447721729561	23	339.467022742444	157	0	5.66	4.93	5.42	6.14	3.98	0.287496572200248	0.42007799442575	0.00305523940227145	0.00995835592575507
95	NIE1	278	1994	6.21871413772197	1.37241306129321	2.69084624093564	23	339.467022742444	157	0	5.66	4.93	5.42	6.14	3.98	0.287496572200248	0.42007799442575	0.00305523940227145	0.00995835592575507
95	NIE1	279	1994	7.79864943745478	0	1.48254528668459	23	339.467022742444	157	0	5.66	4.93	5.42	6.14	3.98	0.287496572200248	0.42007799442575	0.00305523940227145	0.00995835592575507
95	NIE1	280	1994	6.39400227830816	0	1.99824534898108	23	339.467022742444	157	0	5.66	4.93	5.42	6.14	3.98	0.287496572200248	0.42007799442575	0.00305523940227145	0.00995835592575507
95	NIE1	281	1994	7.54335578645552	0.0165604218544912	1.31555085026446	23	339.467022742444	157	0	5.66	4.93	5.42	6.14	3.98	0.287496572200248	0.42007799442575	0.00305523940227145	0.00995835592575507
95	NIE1	282	1994	8.02034314959828	0	1.28013793362185	23	339.467022742444	157	0	5.66	4.93	5.42	6.14	3.98	0.287496572200248	0.42007799442575	0.00305523940227145	0.00995835592575507
95	NIE1	283	1994	8.66168450396199	0	1.58521117463786	23	339.467022742444	157	0	5.66	4.93	5.42	6.14	3.98	0.287496572200248	0.42007799442575	0.00305523940227145	0.00995835592575507
95	NIE1	284	1994	9.27121040055801	0	1.80765620632048	23	339.467022742444	157	0	5.66	4.93	5.42	6.14	3.98	0.287496572200248	0.42007799442575	0.00305523940227145	0.00995835592575507
95	NIE1	285	1994	8.69116786997978	0	1.46173892938433	23	339.467022742444	157	0	5.66	4.93	5.42	6.14	3.98	0.287496572200248	0.42007799442575	0.00305523940227145	0.00995835592575507
95	NIE1	286	1994	9.539707509002	0	1.94999949108498	23	339.467022742444	157	0	5.66	4.93	5.42	6.14	3.98	0.287496572200248	0.42007799442575	0.00305523940227145	0.00995835592575507
95	NIE1	287	1994	11.2853739045919	0	2.01234329666432	23	339.467022742444	157	0	5.66	4.93	5.42	6.14	3.98	0.287496572200248	0.42007799442575	0.00305523940227145	0.00995835592575507
96	NIE1	288	1994	11.2740495307104	0	1.48514366533751	23	339.467022742444	157	0	5.66	4.93	5.42	6.14	3.98	0.287496572200248	0.42007799442575	0.00305523940227145	0.00995835592575507
96	NIE1	289	1994	8.73340841223739	0	2.58598172572988	23	339.467022742444	157	0	5.66	4.93	5.42	6.14	3.98	0.287496572200248	0.42007799442575	0.00305523940227145	0.00995835592575507
96	NIE1	290	1994	4.93499897116197	0	2.6958948760429	23	339.467022742444	157	0	5.66	4.93	5.42	6.14	3.98	0.287496572200248	0.42007799442575	0.00305523940227145	0.00995835592575507
96	NIE1	291	1994	6.07326671692112	0	3.38337663893536	23	339.467022742444	157	0	5.66	4.93	5.42	6.14	3.98	0.287496572200248	0.42007799442575	0.00305523940227145	0.00995835592575507
96	NIE1	292	1994	8.26198415686646	0	4.24003941810937	23	339.467022742444	157	0	5.66	4.93	5.42	6.14	3.98	0.287496572200248	0.42007799442575	0.00305523940227145	0.00995835592575507
96	NIE1	293	1994	8.93721744625768	0	3.64917862712882	23	339.467022742444	157	0	5.66	4.93	5.42	6.14	3.98	0.287496572200248	0.42007799442575	0.00305523940227145	0.00995835592575507
96	NIE1	294	1994	10.3330132753564	0	2.89812981638973	23	339.467022742444	157	0	5.66	4.93	5.42	6.14	3.98	0.287496572200248	0.42007799442575	0.00305523940227145	0.00995835592575507
96	NIE1	295	1994	13.0693352276868	3.12163165412342	5.37056039643101	23	339.467022742444	157	0	5.66	4.93	5.42	6.14	3.98	0.287496572200248	0.42007799442575	0.00305523940227145	0.00995835592575507
96	NIE1	296	1994	13.3496820984445	0.732426655000342	5.45185680667617	23	339.467022742444	157	0	5.66	4.93	5.42	6.14	3.98	0.287496572200248	0.42007799442575	0.00305523940227145	0.00995835592575507
96	NIE1	297	1994	11.0041398454642	0.933312079215895	3.35432926203924	23	339.467022742444	157	0	5.66	4.93	5.42	6.14	3.98	0.287496572200248	0.42007799442575	0.00305523940227145	0.00995835592575507
96	NIE1	298	1994	10.1843874732344	4.46830872146571	4.13465253715595	23	339.467022742444	157	0	5.66	4.93	5.42	6.14	3.98	0.287496572200248	0.42007799442575	0.00305523940227145	0.00995835592575507
96	NIE1	299	1994	9.29382623810029	0.0640914754226729	4.43412480364699	23	339.467022742444	157	0	5.66	4.93	5.42	6.14	3.98	0.287496572200248	0.42007799442575	0.00305523940227145	0.00995835592575507
96	NIE1	300	1994	7.91306258209253	3.44276505494584	4.74010656596711	23	339.467022742444	157	0	5.66	4.93	5.42	6.14	3.98	0.287496572200248	0.42007799442575	0.00305523940227145	0.00995835592575507
96	NIE1	301	1994	8.44435574555366	0.242393561739341	2.92776487587665	23	339.467022742444	157	0	5.66	4.93	5.42	6.14	3.98	0.287496572200248	0.42007799442575	0.00305523940227145	0.00995835592575507
96	NIE1	302	1994	8.61725837540271	16.3095914874892	4.62234037119557	23	339.467022742444	157	0	5.66	4.93	5.42	6.14	3.98	0.287496572200248	0.42007799442575	0.00305523940227145	0.00995835592575507
96	NIE1	303	1994	14.0654315932882	7.9020250196885	6.21167522173707	23	339.467022742444	157	0	5.66	4.93	5.42	6.14	3.98	0.287496572200248	0.42007799442575	0.00305523940227145	0.00995835592575507
97	BIR1	120	2000	13.5070080937799	0	1.50378294714847	3	346.60902929533	79	9	4.82	4.82	4.84	6.82	4.27	0.13247090087431	0.601445289770059	2.4416022238937e-07	5.82621463896864e-11
97	BIR1	121	2000	14.4381463693687	0.0978585751812691	2.39632358215319	3	346.60902929533	79	9	4.82	4.82	4.84	6.82	4.27	0.13247090087431	0.601445289770059	2.4416022238937e-07	5.82621463896864e-11
97	BIR1	122	2000	11.7649016938219	9.52836801763834	3.13424847040446	3	346.60902929533	79	9	4.82	4.82	4.84	6.82	4.27	0.13247090087431	0.601445289770059	2.4416022238937e-07	5.82621463896864e-11
97	BIR1	123	2000	12.566091402869	0.779283575982804	2.28603272195754	3	346.60902929533	79	9	4.82	4.82	4.84	6.82	4.27	0.13247090087431	0.601445289770059	2.4416022238937e-07	5.82621463896864e-11
97	BIR1	124	2000	15.9571755317958	0	2.02946313025849	3	346.60902929533	79	9	4.82	4.82	4.84	6.82	4.27	0.13247090087431	0.601445289770059	2.4416022238937e-07	5.82621463896864e-11
97	BIR1	125	2000	19.2253034636594	0	2.51495074829643	3	346.60902929533	79	9	4.82	4.82	4.84	6.82	4.27	0.13247090087431	0.601445289770059	2.4416022238937e-07	5.82621463896864e-11
98	BIR1	126	2000	20.5840457101339	0	2.78329302360254	3	346.60902929533	79	9	4.82	4.82	4.84	6.82	4.27	0.13247090087431	0.601445289770059	2.4416022238937e-07	5.82621463896864e-11
98	BIR1	127	2000	18.7688029282505	0	2.15649334271259	3	346.60902929533	79	9	4.82	4.82	4.84	6.82	4.27	0.13247090087431	0.601445289770059	2.4416022238937e-07	5.82621463896864e-11
98	BIR1	128	2000	19.1707895233583	1.60500956199716	1.84776295055257	3	346.60902929533	79	9	4.82	4.82	4.84	6.82	4.27	0.13247090087431	0.601445289770059	2.4416022238937e-07	5.82621463896864e-11
98	BIR1	129	2000	20.2317152676134	0	1.32976458888368	3	346.60902929533	79	9	4.82	4.82	4.84	6.82	4.27	0.13247090087431	0.601445289770059	2.4416022238937e-07	5.82621463896864e-11
98	BIR1	130	2000	20.6048407203525	0.766221373051922	1.6514470487465	3	346.60902929533	79	9	4.82	4.82	4.84	6.82	4.27	0.13247090087431	0.601445289770059	2.4416022238937e-07	5.82621463896864e-11
98	BIR1	131	2000	20.5780264362938	0	2.95308949513289	3	346.60902929533	79	9	4.82	4.82	4.84	6.82	4.27	0.13247090087431	0.601445289770059	2.4416022238937e-07	5.82621463896864e-11
98	BIR1	132	2000	19.3987104508051	0	3.1649627016231	3	346.60902929533	79	9	4.82	4.82	4.84	6.82	4.27	0.13247090087431	0.601445289770059	2.4416022238937e-07	5.82621463896864e-11
99	BIR1	133	2000	18.6419887124015	0	2.14172191950747	3	346.60902929533	79	9	4.82	4.82	4.84	6.82	4.27	0.13247090087431	0.601445289770059	2.4416022238937e-07	5.82621463896864e-11
99	BIR1	134	2000	20.9026801080032	0	1.51760647548288	3	346.60902929533	79	9	4.82	4.82	4.84	6.82	4.27	0.13247090087431	0.601445289770059	2.4416022238937e-07	5.82621463896864e-11
99	BIR1	135	2000	21.9625985687577	0	1.86391996723539	3	346.60902929533	79	9	4.82	4.82	4.84	6.82	4.27	0.13247090087431	0.601445289770059	2.4416022238937e-07	5.82621463896864e-11
99	BIR1	136	2000	20.5810522619301	16.7054630328563	2.28348038639787	3	346.60902929533	79	9	4.82	4.82	4.84	6.82	4.27	0.13247090087431	0.601445289770059	2.4416022238937e-07	5.82621463896864e-11
99	BIR1	137	2000	13.9547220164396	0.648217222925068	3.65350149223465	3	346.60902929533	79	9	4.82	4.82	4.84	6.82	4.27	0.13247090087431	0.601445289770059	2.4416022238937e-07	5.82621463896864e-11
99	BIR1	138	2000	11.0335404345556	6.95435843564255	3.54156145319941	3	346.60902929533	79	9	4.82	4.82	4.84	6.82	4.27	0.13247090087431	0.601445289770059	2.4416022238937e-07	5.82621463896864e-11
99	BIR1	139	2000	9.01035240765462	14.4975594941899	3.64807990161751	3	346.60902929533	79	9	4.82	4.82	4.84	6.82	4.27	0.13247090087431	0.601445289770059	2.4416022238937e-07	5.82621463896864e-11
100	BIR1	140	2000	10.8391405013872	1.0223826461432	2.65264928659475	3	346.60902929533	79	9	4.82	4.82	4.84	6.82	4.27	0.13247090087431	0.601445289770059	2.4416022238937e-07	5.82621463896864e-11
100	BIR1	141	2000	10.8480142510526	6.04387923932027	2.52950682529503	3	346.60902929533	79	9	4.82	4.82	4.84	6.82	4.27	0.13247090087431	0.601445289770059	2.4416022238937e-07	5.82621463896864e-11
100	BIR1	142	2000	11.7482544254793	1.48670073837995	2.67517208448041	3	346.60902929533	79	9	4.82	4.82	4.84	6.82	4.27	0.13247090087431	0.601445289770059	2.4416022238937e-07	5.82621463896864e-11
100	BIR1	143	2000	15.5389809100264	5.27437491831158	2.93224799165296	3	346.60902929533	79	9	4.82	4.82	4.84	6.82	4.27	0.13247090087431	0.601445289770059	2.4416022238937e-07	5.82621463896864e-11
100	BIR1	144	2000	14.7012080944226	13.2559873140979	2.99437451993331	3	346.60902929533	79	9	4.82	4.82	4.84	6.82	4.27	0.13247090087431	0.601445289770059	2.4416022238937e-07	5.82621463896864e-11
100	BIR1	145	2000	13.3731504918702	3.75858407340882	4.78857893999777	3	346.60902929533	79	9	4.82	4.82	4.84	6.82	4.27	0.13247090087431	0.601445289770059	2.4416022238937e-07	5.82621463896864e-11
100	BIR1	146	2000	15.633282075248	0.745665971341844	3.37240290387575	3	346.60902929533	79	9	4.82	4.82	4.84	6.82	4.27	0.13247090087431	0.601445289770059	2.4416022238937e-07	5.82621463896864e-11
101	BIR1	147	2000	12.1491856212014	5.24204389335134	5.59368540739313	3	346.60902929533	79	9	4.82	4.82	4.84	6.82	4.27	0.13247090087431	0.601445289770059	2.4416022238937e-07	5.82621463896864e-11
101	BIR1	148	2000	9.97732875919853	6.21803760153149	6.5047989174059	3	346.60902929533	79	9	4.82	4.82	4.84	6.82	4.27	0.13247090087431	0.601445289770059	2.4416022238937e-07	5.82621463896864e-11
101	BIR1	149	2000	10.3036588983078	5.41088946919514	4.45522011014896	3	346.60902929533	79	9	4.82	4.82	4.84	6.82	4.27	0.13247090087431	0.601445289770059	2.4416022238937e-07	5.82621463896864e-11
101	BIR1	150	2000	11.5844519065133	0.724988462882383	2.18595039631943	3	346.60902929533	79	9	4.82	4.82	4.84	6.82	4.27	0.13247090087431	0.601445289770059	2.4416022238937e-07	5.82621463896864e-11
101	BIR1	151	2000	14.1405787594043	0	1.42944563471684	3	346.60902929533	79	9	4.82	4.82	4.84	6.82	4.27	0.13247090087431	0.601445289770059	2.4416022238937e-07	5.82621463896864e-11
101	BIR1	152	2000	17.4421950060341	0	3.36598812402701	3	346.60902929533	79	9	4.82	4.82	4.84	6.82	4.27	0.13247090087431	0.601445289770059	2.4416022238937e-07	5.82621463896864e-11
101	BIR1	153	2000	18.6408787092319	0	2.62907630674675	3	346.60902929533	79	9	4.82	4.82	4.84	6.82	4.27	0.13247090087431	0.601445289770059	2.4416022238937e-07	5.82621463896864e-11
101	BIR1	154	2000	20.3174801657018	16.8232754287543	1.99041140745556	3	346.60902929533	79	9	4.82	4.82	4.84	6.82	4.27	0.13247090087431	0.601445289770059	2.4416022238937e-07	5.82621463896864e-11
102	BIR1	155	2000	18.1721502163594	0.0326307064391997	2.51641516610439	3	346.60902929533	79	9	4.82	4.82	4.84	6.82	4.27	0.13247090087431	0.601445289770059	2.4416022238937e-07	5.82621463896864e-11
102	BIR1	156	2000	13.1448166336688	10.4541194996066	2.53786541810417	3	346.60902929533	79	9	4.82	4.82	4.84	6.82	4.27	0.13247090087431	0.601445289770059	2.4416022238937e-07	5.82621463896864e-11
102	BIR1	157	2000	12.8161931280401	4.90234741889987	3.73879980765756	3	346.60902929533	79	9	4.82	4.82	4.84	6.82	4.27	0.13247090087431	0.601445289770059	2.4416022238937e-07	5.82621463896864e-11
102	BIR1	158	2000	13.1271358201052	0.911279743250253	3.92586820079861	3	346.60902929533	79	9	4.82	4.82	4.84	6.82	4.27	0.13247090087431	0.601445289770059	2.4416022238937e-07	5.82621463896864e-11
102	BIR1	159	2000	17.6050055660646	0	2.58133112610253	3	346.60902929533	79	9	4.82	4.82	4.84	6.82	4.27	0.13247090087431	0.601445289770059	2.4416022238937e-07	5.82621463896864e-11
102	BIR1	160	2000	24.2910190150819	2.05009554460165	3.94159250419502	3	346.60902929533	79	9	4.82	4.82	4.84	6.82	4.27	0.13247090087431	0.601445289770059	2.4416022238937e-07	5.82621463896864e-11
103	BIR1	161	2000	18.5866348594393	0	2.47226122452577	3	346.60902929533	79	9	4.82	4.82	4.84	6.82	4.27	0.13247090087431	0.601445289770059	2.4416022238937e-07	5.82621463896864e-11
103	BIR1	162	2000	17.4224337018996	0	2.63991927012831	3	346.60902929533	79	9	4.82	4.82	4.84	6.82	4.27	0.13247090087431	0.601445289770059	2.4416022238937e-07	5.82621463896864e-11
103	BIR1	163	2000	18.2973743821333	0.00278797070525716	2.83283806969514	3	346.60902929533	79	9	4.82	4.82	4.84	6.82	4.27	0.13247090087431	0.601445289770059	2.4416022238937e-07	5.82621463896864e-11
103	BIR1	164	2000	19.2856818425115	0	2.64938725833036	3	346.60902929533	79	9	4.82	4.82	4.84	6.82	4.27	0.13247090087431	0.601445289770059	2.4416022238937e-07	5.82621463896864e-11
103	BIR1	165	2000	18.9856895445066	1.60443084468224	2.85877760794747	3	346.60902929533	79	9	4.82	4.82	4.84	6.82	4.27	0.13247090087431	0.601445289770059	2.4416022238937e-07	5.82621463896864e-11
103	BIR1	166	2000	15.0467408511311	0.668205619887317	3.53395640117393	3	346.60902929533	79	9	4.82	4.82	4.84	6.82	4.27	0.13247090087431	0.601445289770059	2.4416022238937e-07	5.82621463896864e-11
103	BIR1	167	2000	13.5466384550806	0.00593114387704485	2.83752196802108	3	346.60902929533	79	9	4.82	4.82	4.84	6.82	4.27	0.13247090087431	0.601445289770059	2.4416022238937e-07	5.82621463896864e-11
104	BIR1	168	2000	15.7975080319972	0.00768935589046249	1.58371588712781	3	346.60902929533	79	9	4.82	4.82	4.84	6.82	4.27	0.13247090087431	0.601445289770059	2.4416022238937e-07	5.82621463896864e-11
104	BIR1	169	2000	22.2712007893581	0.00853601803339687	1.80723121261925	3	346.60902929533	79	9	4.82	4.82	4.84	6.82	4.27	0.13247090087431	0.601445289770059	2.4416022238937e-07	5.82621463896864e-11
104	BIR1	170	2000	26.4780198440405	0.00939691700815315	2.77130243586562	3	346.60902929533	79	9	4.82	4.82	4.84	6.82	4.27	0.13247090087431	0.601445289770059	2.4416022238937e-07	5.82621463896864e-11
104	BIR1	171	2000	27.5468601887445	0.0101964706672493	2.89872521223938	3	346.60902929533	79	9	4.82	4.82	4.84	6.82	4.27	0.13247090087431	0.601445289770059	2.4416022238937e-07	5.82621463896864e-11
104	BIR1	172	2000	22.005359386391	4.5885572826323	2.92312965784406	3	346.60902929533	79	9	4.82	4.82	4.84	6.82	4.27	0.13247090087431	0.601445289770059	2.4416022238937e-07	5.82621463896864e-11
104	BIR1	173	2000	17.7581442630889	0.185789613969667	3.81917479627557	3	346.60902929533	79	9	4.82	4.82	4.84	6.82	4.27	0.13247090087431	0.601445289770059	2.4416022238937e-07	5.82621463896864e-11
104	BIR1	174	2000	15.935743861599	9.51827245179981	4.16674441254583	3	346.60902929533	79	9	4.82	4.82	4.84	6.82	4.27	0.13247090087431	0.601445289770059	2.4416022238937e-07	5.82621463896864e-11
105	BIR1	175	2000	12.6241838408991	5.45018284479599	3.68902344028824	3	346.60902929533	79	9	4.82	4.82	4.84	6.82	4.27	0.13247090087431	0.601445289770059	2.4416022238937e-07	5.82621463896864e-11
105	BIR1	176	2000	12.838069488163	4.75622187525586	3.44704704373916	3	346.60902929533	79	9	4.82	4.82	4.84	6.82	4.27	0.13247090087431	0.601445289770059	2.4416022238937e-07	5.82621463896864e-11
105	BIR1	177	2000	12.2802515327259	0.0125167474008614	3.84192058766834	3	346.60902929533	79	9	4.82	4.82	4.84	6.82	4.27	0.13247090087431	0.601445289770059	2.4416022238937e-07	5.82621463896864e-11
105	BIR1	178	2000	13.1923388005172	0.0137300443079527	3.05711385289574	3	346.60902929533	79	9	4.82	4.82	4.84	6.82	4.27	0.13247090087431	0.601445289770059	2.4416022238937e-07	5.82621463896864e-11
105	BIR1	179	2000	12.4236434474565	0.0146112150058313	2.58411195186744	3	346.60902929533	79	9	4.82	4.82	4.84	6.82	4.27	0.13247090087431	0.601445289770059	2.4416022238937e-07	5.82621463896864e-11
105	BIR1	180	2000	14.0329280258998	0.0139187048193525	2.90648284818217	3	346.60902929533	79	9	4.82	4.82	4.84	6.82	4.27	0.13247090087431	0.601445289770059	2.4416022238937e-07	5.82621463896864e-11
105	BIR1	181	2000	15.2360917736855	0.0133621127654626	2.10289238898166	3	346.60902929533	79	9	4.82	4.82	4.84	6.82	4.27	0.13247090087431	0.601445289770059	2.4416022238937e-07	5.82621463896864e-11
105	BIR1	182	2000	15.5641794128381	5.64289828391837	2.04338411963913	3	346.60902929533	79	9	4.82	4.82	4.84	6.82	4.27	0.13247090087431	0.601445289770059	2.4416022238937e-07	5.82621463896864e-11
105	BIR1	183	2000	20.1894944061633	13.2058275334181	1.70453881183029	3	346.60902929533	79	9	4.82	4.82	4.84	6.82	4.27	0.13247090087431	0.601445289770059	2.4416022238937e-07	5.82621463896864e-11
106	BIR1	184	2000	18.7428128033157	1.11608704169488	2.08566808929542	3	346.60902929533	79	9	4.82	4.82	4.84	6.82	4.27	0.13247090087431	0.601445289770059	2.4416022238937e-07	5.82621463896864e-11
106	BIR1	185	2000	18.3652761344795	2.07400114591584	2.19057515189595	3	346.60902929533	79	9	4.82	4.82	4.84	6.82	4.27	0.13247090087431	0.601445289770059	2.4416022238937e-07	5.82621463896864e-11
106	BIR1	186	2000	16.8339094281695	4.57344635233258	4.19842590568081	3	346.60902929533	79	9	4.82	4.82	4.84	6.82	4.27	0.13247090087431	0.601445289770059	2.4416022238937e-07	5.82621463896864e-11
106	BIR1	187	2000	17.2393197059909	0.0265286317784166	2.38960778854288	3	346.60902929533	79	9	4.82	4.82	4.84	6.82	4.27	0.13247090087431	0.601445289770059	2.4416022238937e-07	5.82621463896864e-11
106	BIR1	188	2000	14.1944490490423	0	2.92607110154216	3	346.60902929533	79	9	4.82	4.82	4.84	6.82	4.27	0.13247090087431	0.601445289770059	2.4416022238937e-07	5.82621463896864e-11
106	BIR1	189	2000	13.2154532667668	1.06367553555783	3.19682764975379	3	346.60902929533	79	9	4.82	4.82	4.84	6.82	4.27	0.13247090087431	0.601445289770059	2.4416022238937e-07	5.82621463896864e-11
107	BIR1	190	2000	13.558673970804	4.22320581761377	4.21371027056326	3	346.60902929533	79	9	4.82	4.82	4.84	6.82	4.27	0.13247090087431	0.601445289770059	2.4416022238937e-07	5.82621463896864e-11
107	BIR1	191	2000	14.5811291132592	9.39248080826599	5.257626915792	3	346.60902929533	79	9	4.82	4.82	4.84	6.82	4.27	0.13247090087431	0.601445289770059	2.4416022238937e-07	5.82621463896864e-11
107	BIR1	192	2000	13.6606288434203	1.47930070365167	4.385712289941	3	346.60902929533	79	9	4.82	4.82	4.84	6.82	4.27	0.13247090087431	0.601445289770059	2.4416022238937e-07	5.82621463896864e-11
107	BIR1	193	2000	12.8828457456665	2.50998046589441	4.24660216912045	3	346.60902929533	79	9	4.82	4.82	4.84	6.82	4.27	0.13247090087431	0.601445289770059	2.4416022238937e-07	5.82621463896864e-11
107	BIR1	194	2000	14.403561408164	4.47869662761431	3.61020938956611	3	346.60902929533	79	9	4.82	4.82	4.84	6.82	4.27	0.13247090087431	0.601445289770059	2.4416022238937e-07	5.82621463896864e-11
107	BIR1	195	2000	13.1674060568176	5.92750579625534	3.28430912801247	3	346.60902929533	79	9	4.82	4.82	4.84	6.82	4.27	0.13247090087431	0.601445289770059	2.4416022238937e-07	5.82621463896864e-11
107	BIR1	196	2000	12.0110709849257	6.06519086257443	2.99477288443878	3	346.60902929533	79	9	4.82	4.82	4.84	6.82	4.27	0.13247090087431	0.601445289770059	2.4416022238937e-07	5.82621463896864e-11
107	BIR1	197	2000	14.2080803770132	0.627925377194269	2.2063558426116	3	346.60902929533	79	9	4.82	4.82	4.84	6.82	4.27	0.13247090087431	0.601445289770059	2.4416022238937e-07	5.82621463896864e-11
108	BIR1	198	2000	13.655293220503	0.469766777333161	2.56179418091949	3	346.60902929533	79	9	4.82	4.82	4.84	6.82	4.27	0.13247090087431	0.601445289770059	2.4416022238937e-07	5.82621463896864e-11
108	BIR1	199	2000	14.335887401926	1.14731135261243	3.21009979514771	3	346.60902929533	79	9	4.82	4.82	4.84	6.82	4.27	0.13247090087431	0.601445289770059	2.4416022238937e-07	5.82621463896864e-11
108	BIR1	200	2000	15.5610320602317	0.242641980679354	3.32726793615189	3	346.60902929533	79	9	4.82	4.82	4.84	6.82	4.27	0.13247090087431	0.601445289770059	2.4416022238937e-07	5.82621463896864e-11
108	BIR1	201	2000	17.0928407314201	0.0164746067643429	2.64740538960639	3	346.60902929533	79	9	4.82	4.82	4.84	6.82	4.27	0.13247090087431	0.601445289770059	2.4416022238937e-07	5.82621463896864e-11
108	BIR1	202	2000	15.7421508939131	0.0127346314717607	3.28103877368653	3	346.60902929533	79	9	4.82	4.82	4.84	6.82	4.27	0.13247090087431	0.601445289770059	2.4416022238937e-07	5.82621463896864e-11
108	BIR1	203	2000	15.9982447339169	0.0271735032450486	1.93023636000019	3	346.60902929533	79	9	4.82	4.82	4.84	6.82	4.27	0.13247090087431	0.601445289770059	2.4416022238937e-07	5.82621463896864e-11
109	BIR1	204	2000	17.5589244635961	0	1.91430855585276	3	346.60902929533	79	9	4.82	4.82	4.84	6.82	4.27	0.13247090087431	0.601445289770059	2.4416022238937e-07	5.82621463896864e-11
109	BIR1	205	2000	17.6370421995302	13.6745005254805	2.74392365164677	3	346.60902929533	79	9	4.82	4.82	4.84	6.82	4.27	0.13247090087431	0.601445289770059	2.4416022238937e-07	5.82621463896864e-11
109	BIR1	206	2000	16.5809229287468	4.51916631255647	3.63514569507416	3	346.60902929533	79	9	4.82	4.82	4.84	6.82	4.27	0.13247090087431	0.601445289770059	2.4416022238937e-07	5.82621463896864e-11
109	BIR1	207	2000	16.7859725664213	0	1.95449515744328	3	346.60902929533	79	9	4.82	4.82	4.84	6.82	4.27	0.13247090087431	0.601445289770059	2.4416022238937e-07	5.82621463896864e-11
109	BIR1	208	2000	17.4923041097415	10.9524861630048	2.10639517181123	3	346.60902929533	79	9	4.82	4.82	4.84	6.82	4.27	0.13247090087431	0.601445289770059	2.4416022238937e-07	5.82621463896864e-11
109	BIR1	209	2000	16.2706500693727	12.7615193485415	2.65517090274409	3	346.60902929533	79	9	4.82	4.82	4.84	6.82	4.27	0.13247090087431	0.601445289770059	2.4416022238937e-07	5.82621463896864e-11
109	BIR1	210	2000	16.7202091984195	3.26172948699365	2.59923417809364	3	346.60902929533	79	9	4.82	4.82	4.84	6.82	4.27	0.13247090087431	0.601445289770059	2.4416022238937e-07	5.82621463896864e-11
110	BIR1	211	2000	16.6751414901891	1.32871303272436	2.6349623893568	3	346.60902929533	79	9	4.82	4.82	4.84	6.82	4.27	0.13247090087431	0.601445289770059	2.4416022238937e-07	5.82621463896864e-11
110	BIR1	212	2000	18.1384047972504	0.0304869246365285	1.68878689290963	3	346.60902929533	79	9	4.82	4.82	4.84	6.82	4.27	0.13247090087431	0.601445289770059	2.4416022238937e-07	5.82621463896864e-11
110	BIR1	213	2000	22.8961254837318	6.13251167172966	2.33266676865696	3	346.60902929533	79	9	4.82	4.82	4.84	6.82	4.27	0.13247090087431	0.601445289770059	2.4416022238937e-07	5.82621463896864e-11
110	BIR1	214	2000	18.4186843613755	0.873308313504391	3.43417933733864	3	346.60902929533	79	9	4.82	4.82	4.84	6.82	4.27	0.13247090087431	0.601445289770059	2.4416022238937e-07	5.82621463896864e-11
110	BIR1	215	2000	16.9251283904369	4.51364966768047	2.64685135056302	3	346.60902929533	79	9	4.82	4.82	4.84	6.82	4.27	0.13247090087431	0.601445289770059	2.4416022238937e-07	5.82621463896864e-11
110	BIR1	216	2000	17.1097396548117	0.057345116664183	1.53411356101165	3	346.60902929533	79	9	4.82	4.82	4.84	6.82	4.27	0.13247090087431	0.601445289770059	2.4416022238937e-07	5.82621463896864e-11
110	BIR1	217	2000	17.4784309932193	0.01338100582521	1.69633321090553	3	346.60902929533	79	9	4.82	4.82	4.84	6.82	4.27	0.13247090087431	0.601445289770059	2.4416022238937e-07	5.82621463896864e-11
110	BIR1	218	2000	18.9727030540807	0.115288462094708	2.10557392182043	3	346.60902929533	79	9	4.82	4.82	4.84	6.82	4.27	0.13247090087431	0.601445289770059	2.4416022238937e-07	5.82621463896864e-11
110	BIR1	219	2000	18.4257390084379	1.05976752549546	2.25432339800758	3	346.60902929533	79	9	4.82	4.82	4.84	6.82	4.27	0.13247090087431	0.601445289770059	2.4416022238937e-07	5.82621463896864e-11
111	BIR1	220	2000	17.9611702780499	0.270054499946812	2.01621950164358	3	346.60902929533	79	9	4.82	4.82	4.84	6.82	4.27	0.13247090087431	0.601445289770059	2.4416022238937e-07	5.82621463896864e-11
111	BIR1	221	2000	19.23547837464	0.0132186826152938	1.46511113084615	3	346.60902929533	79	9	4.82	4.82	4.84	6.82	4.27	0.13247090087431	0.601445289770059	2.4416022238937e-07	5.82621463896864e-11
111	BIR1	222	2000	19.4746100289179	0.0167874319220762	3.00458121783624	3	346.60902929533	79	9	4.82	4.82	4.84	6.82	4.27	0.13247090087431	0.601445289770059	2.4416022238937e-07	5.82621463896864e-11
111	BIR1	223	2000	18.9967449390794	0.012545804751293	1.88781131461945	3	346.60902929533	79	9	4.82	4.82	4.84	6.82	4.27	0.13247090087431	0.601445289770059	2.4416022238937e-07	5.82621463896864e-11
111	BIR1	224	2000	19.3360903102504	0.0134179597398738	1.31644421562106	3	346.60902929533	79	9	4.82	4.82	4.84	6.82	4.27	0.13247090087431	0.601445289770059	2.4416022238937e-07	5.82621463896864e-11
111	BIR1	225	2000	22.6167954834106	0.0135037322379672	1.3813172330574	3	346.60902929533	79	9	4.82	4.82	4.84	6.82	4.27	0.13247090087431	0.601445289770059	2.4416022238937e-07	5.82621463896864e-11
111	BIR1	226	2000	23.1827220243091	0.0793751576076565	2.09331639176801	3	346.60902929533	79	9	4.82	4.82	4.84	6.82	4.27	0.13247090087431	0.601445289770059	2.4416022238937e-07	5.82621463896864e-11
111	BIR1	227	2000	19.2397907548567	0.118207188564286	2.4701229173397	3	346.60902929533	79	9	4.82	4.82	4.84	6.82	4.27	0.13247090087431	0.601445289770059	2.4416022238937e-07	5.82621463896864e-11
112	BIR1	228	2000	19.1397638757025	5.87595905487354	2.5913055615622	3	346.60902929533	79	9	4.82	4.82	4.84	6.82	4.27	0.13247090087431	0.601445289770059	2.4416022238937e-07	5.82621463896864e-11
112	BIR1	229	2000	17.9563496279154	0.160029897427483	2.74449144836207	3	346.60902929533	79	9	4.82	4.82	4.84	6.82	4.27	0.13247090087431	0.601445289770059	2.4416022238937e-07	5.82621463896864e-11
112	BIR1	230	2000	18.7814169418212	1.96704317317464	1.60366230058399	3	346.60902929533	79	9	4.82	4.82	4.84	6.82	4.27	0.13247090087431	0.601445289770059	2.4416022238937e-07	5.82621463896864e-11
112	BIR1	231	2000	19.3754001399814	7.86152970254594	2.28451857957813	3	346.60902929533	79	9	4.82	4.82	4.84	6.82	4.27	0.13247090087431	0.601445289770059	2.4416022238937e-07	5.82621463896864e-11
112	BIR1	232	2000	18.8568522477302	10.747734779341	1.80660140489104	3	346.60902929533	79	9	4.82	4.82	4.84	6.82	4.27	0.13247090087431	0.601445289770059	2.4416022238937e-07	5.82621463896864e-11
112	BIR1	233	2000	15.6657861867343	0	2.22085550845678	3	346.60902929533	79	9	4.82	4.82	4.84	6.82	4.27	0.13247090087431	0.601445289770059	2.4416022238937e-07	5.82621463896864e-11
112	BIR1	234	2000	15.878026996112	0.0141861326227568	1.50353575744035	3	346.60902929533	79	9	4.82	4.82	4.84	6.82	4.27	0.13247090087431	0.601445289770059	2.4416022238937e-07	5.82621463896864e-11
113	BIR1	235	2000	16.1636329009772	0.0151921174736418	2.08056160946086	3	346.60902929533	79	9	4.82	4.82	4.84	6.82	4.27	0.13247090087431	0.601445289770059	2.4416022238937e-07	5.82621463896864e-11
113	BIR1	236	2000	16.8339469078251	0.0158876209949961	1.94415130147497	3	346.60902929533	79	9	4.82	4.82	4.84	6.82	4.27	0.13247090087431	0.601445289770059	2.4416022238937e-07	5.82621463896864e-11
113	BIR1	237	2000	16.5888504420092	0.0162398181989265	2.08391182430123	3	346.60902929533	79	9	4.82	4.82	4.84	6.82	4.27	0.13247090087431	0.601445289770059	2.4416022238937e-07	5.82621463896864e-11
113	BIR1	238	2000	21.0814545393974	7.65085531759378	3.78609019576809	3	346.60902929533	79	9	4.82	4.82	4.84	6.82	4.27	0.13247090087431	0.601445289770059	2.4416022238937e-07	5.82621463896864e-11
113	BIR1	239	2000	16.2276475647572	12.3754602600722	2.40911609781712	3	346.60902929533	79	9	4.82	4.82	4.84	6.82	4.27	0.13247090087431	0.601445289770059	2.4416022238937e-07	5.82621463896864e-11
113	BIR1	240	2000	15.951214133464	0.879776649565835	2.68407128573456	3	346.60902929533	79	9	4.82	4.82	4.84	6.82	4.27	0.13247090087431	0.601445289770059	2.4416022238937e-07	5.82621463896864e-11
113	BIR1	241	2000	15.6518534994113	0.00812833137946667	1.77003252426004	3	346.60902929533	79	9	4.82	4.82	4.84	6.82	4.27	0.13247090087431	0.601445289770059	2.4416022238937e-07	5.82621463896864e-11
114	BIR1	242	2000	15.095688284719	0.0161387100100061	1.35210925627323	3	346.60902929533	79	9	4.82	4.82	4.84	6.82	4.27	0.13247090087431	0.601445289770059	2.4416022238937e-07	5.82621463896864e-11
114	BIR1	243	2000	14.9509251541592	0.0177333424863835	1.58363577690332	3	346.60902929533	79	9	4.82	4.82	4.84	6.82	4.27	0.13247090087431	0.601445289770059	2.4416022238937e-07	5.82621463896864e-11
114	BIR1	244	2000	14.5618401969543	7.53511665367808	2.72112340952045	3	346.60902929533	79	9	4.82	4.82	4.84	6.82	4.27	0.13247090087431	0.601445289770059	2.4416022238937e-07	5.82621463896864e-11
114	BIR1	245	2000	13.8361029954375	13.460029479195	3.8626018393706	3	346.60902929533	79	9	4.82	4.82	4.84	6.82	4.27	0.13247090087431	0.601445289770059	2.4416022238937e-07	5.82621463896864e-11
114	BIR1	246	2000	13.7567996945663	2.17102983810142	3.85713306275812	3	346.60902929533	79	9	4.82	4.82	4.84	6.82	4.27	0.13247090087431	0.601445289770059	2.4416022238937e-07	5.82621463896864e-11
114	BIR1	247	2000	13.0546955734054	0.208902013664205	2.3560228613752	3	346.60902929533	79	9	4.82	4.82	4.84	6.82	4.27	0.13247090087431	0.601445289770059	2.4416022238937e-07	5.82621463896864e-11
114	BIR1	248	2000	15.1734867313666	1.38854604778848	2.11390318331259	3	346.60902929533	79	9	4.82	4.82	4.84	6.82	4.27	0.13247090087431	0.601445289770059	2.4416022238937e-07	5.82621463896864e-11
115	BIR1	249	2000	13.7370336388436	8.21390603125604	3.56103756664063	3	346.60902929533	79	9	4.82	4.82	4.84	6.82	4.27	0.13247090087431	0.601445289770059	2.4416022238937e-07	5.82621463896864e-11
115	BIR1	250	2000	15.5895414064665	0.188449095378101	3.4613134197746	3	346.60902929533	79	9	4.82	4.82	4.84	6.82	4.27	0.13247090087431	0.601445289770059	2.4416022238937e-07	5.82621463896864e-11
115	BIR1	251	2000	18.4037447917263	0.87146393846749	3.07160230755565	3	346.60902929533	79	9	4.82	4.82	4.84	6.82	4.27	0.13247090087431	0.601445289770059	2.4416022238937e-07	5.82621463896864e-11
115	BIR1	252	2000	18.5920609839845	0.198308228609888	1.92419743303971	3	346.60902929533	79	9	4.82	4.82	4.84	6.82	4.27	0.13247090087431	0.601445289770059	2.4416022238937e-07	5.82621463896864e-11
115	BIR1	253	2000	19.0516992550271	0.0208028438173944	1.05248192140122	3	346.60902929533	79	9	4.82	4.82	4.84	6.82	4.27	0.13247090087431	0.601445289770059	2.4416022238937e-07	5.82621463896864e-11
115	BIR1	254	2000	19.4598786855623	0.0227581165873838	1.6371038980499	3	346.60902929533	79	9	4.82	4.82	4.84	6.82	4.27	0.13247090087431	0.601445289770059	2.4416022238937e-07	5.82621463896864e-11
115	BIR1	255	2000	19.653419532692	0.00161768524932127	2.59872378760331	3	346.60902929533	79	9	4.82	4.82	4.84	6.82	4.27	0.13247090087431	0.601445289770059	2.4416022238937e-07	5.82621463896864e-11
116	BIR1	256	2000	15.8476119484065	0.13991235613534	2.56858123355709	3	346.60902929533	79	9	4.82	4.82	4.84	6.82	4.27	0.13247090087431	0.601445289770059	2.4416022238937e-07	5.82621463896864e-11
116	BIR1	257	2000	16.6703332350687	0.0996736929438544	1.5670068618267	3	346.60902929533	79	9	4.82	4.82	4.84	6.82	4.27	0.13247090087431	0.601445289770059	2.4416022238937e-07	5.82621463896864e-11
116	BIR1	258	2000	18.3910888349666	11.7100508665513	2.86689398768655	3	346.60902929533	79	9	4.82	4.82	4.84	6.82	4.27	0.13247090087431	0.601445289770059	2.4416022238937e-07	5.82621463896864e-11
116	BIR1	259	2000	13.6541130492174	2.3052496109507	3.83070144172962	3	346.60902929533	79	9	4.82	4.82	4.84	6.82	4.27	0.13247090087431	0.601445289770059	2.4416022238937e-07	5.82621463896864e-11
116	BIR1	260	2000	14.158757347004	0.905387564140176	1.96138995012109	3	346.60902929533	79	9	4.82	4.82	4.84	6.82	4.27	0.13247090087431	0.601445289770059	2.4416022238937e-07	5.82621463896864e-11
116	BIR1	261	2000	15.6813646558344	0.0229847874773901	2.55297146984385	3	346.60902929533	79	9	4.82	4.82	4.84	6.82	4.27	0.13247090087431	0.601445289770059	2.4416022238937e-07	5.82621463896864e-11
116	BIR1	262	2000	17.1350415599898	0.325095676566683	3.8956625146542	3	346.60902929533	79	9	4.82	4.82	4.84	6.82	4.27	0.13247090087431	0.601445289770059	2.4416022238937e-07	5.82621463896864e-11
116	BIR1	263	2000	13.8879114111755	25.8859859764471	2.43770016817269	3	346.60902929533	79	9	4.82	4.82	4.84	6.82	4.27	0.13247090087431	0.601445289770059	2.4416022238937e-07	5.82621463896864e-11
116	BIR1	264	2000	11.5768007045178	0.803399455636996	2.48655630226894	3	346.60902929533	79	9	4.82	4.82	4.84	6.82	4.27	0.13247090087431	0.601445289770059	2.4416022238937e-07	5.82621463896864e-11
117	BIR1	265	2000	15.0151419762873	0.0230136128576786	1.91719404003074	3	346.60902929533	79	9	4.82	4.82	4.84	6.82	4.27	0.13247090087431	0.601445289770059	2.4416022238937e-07	5.82621463896864e-11
117	BIR1	266	2000	14.8718898760447	0.0232260442869956	2.86937967452408	3	346.60902929533	79	9	4.82	4.82	4.84	6.82	4.27	0.13247090087431	0.601445289770059	2.4416022238937e-07	5.82621463896864e-11
117	BIR1	267	2000	15.6140611725463	1.57918847438781	3.40489683933116	3	346.60902929533	79	9	4.82	4.82	4.84	6.82	4.27	0.13247090087431	0.601445289770059	2.4416022238937e-07	5.82621463896864e-11
117	BIR1	268	2000	15.5565200873808	1.02183461070658	1.79155702398746	3	346.60902929533	79	9	4.82	4.82	4.84	6.82	4.27	0.13247090087431	0.601445289770059	2.4416022238937e-07	5.82621463896864e-11
117	BIR1	269	2000	17.800833401246	0.324102748881217	2.4541636069633	3	346.60902929533	79	9	4.82	4.82	4.84	6.82	4.27	0.13247090087431	0.601445289770059	2.4416022238937e-07	5.82621463896864e-11
117	BIR1	270	2000	16.137772889165	0.825715306392397	2.61289362952274	3	346.60902929533	79	9	4.82	4.82	4.84	6.82	4.27	0.13247090087431	0.601445289770059	2.4416022238937e-07	5.82621463896864e-11
117	BIR1	271	2000	17.1203802298845	1.87033774534465	3.46445523053482	3	346.60902929533	79	9	4.82	4.82	4.84	6.82	4.27	0.13247090087431	0.601445289770059	2.4416022238937e-07	5.82621463896864e-11
117	BIR1	272	2000	18.230241341219	0.0216479919030375	2.71941439452933	3	346.60902929533	79	9	4.82	4.82	4.84	6.82	4.27	0.13247090087431	0.601445289770059	2.4416022238937e-07	5.82621463896864e-11
117	BIR1	273	2000	15.5602699654981	4.27647178488762	2.1965176122595	3	346.60902929533	79	9	4.82	4.82	4.84	6.82	4.27	0.13247090087431	0.601445289770059	2.4416022238937e-07	5.82621463896864e-11
117	BIR1	274	2000	13.1085810515348	22.6124829346869	2.4075989204678	3	346.60902929533	79	9	4.82	4.82	4.84	6.82	4.27	0.13247090087431	0.601445289770059	2.4416022238937e-07	5.82621463896864e-11
117	BIR1	275	2000	12.4396043382267	0.0509062021958977	2.68063594299112	3	346.60902929533	79	9	4.82	4.82	4.84	6.82	4.27	0.13247090087431	0.601445289770059	2.4416022238937e-07	5.82621463896864e-11
117	BIR1	276	2000	12.5015836603487	0.0195891611818373	1.9066889618581	3	346.60902929533	79	9	4.82	4.82	4.84	6.82	4.27	0.13247090087431	0.601445289770059	2.4416022238937e-07	5.82621463896864e-11
117	BIR1	277	2000	13.0998490140913	0.88033415815616	1.83713244206988	3	346.60902929533	79	9	4.82	4.82	4.84	6.82	4.27	0.13247090087431	0.601445289770059	2.4416022238937e-07	5.82621463896864e-11
117	BIR1	278	2000	12.1358196473085	1.05354805268151	1.78874386878338	3	346.60902929533	79	9	4.82	4.82	4.84	6.82	4.27	0.13247090087431	0.601445289770059	2.4416022238937e-07	5.82621463896864e-11
117	BIR1	279	2000	8.90253190859511	2.77397702367244	2.59519349621181	3	346.60902929533	79	9	4.82	4.82	4.84	6.82	4.27	0.13247090087431	0.601445289770059	2.4416022238937e-07	5.82621463896864e-11
117	BIR1	280	2000	7.9959106755384	0.0170764297905024	1.68348683177087	3	346.60902929533	79	9	4.82	4.82	4.84	6.82	4.27	0.13247090087431	0.601445289770059	2.4416022238937e-07	5.82621463896864e-11
117	BIR1	281	2000	9.85259969303076	4.69340126161708	3.30573873524151	3	346.60902929533	79	9	4.82	4.82	4.84	6.82	4.27	0.13247090087431	0.601445289770059	2.4416022238937e-07	5.82621463896864e-11
117	BIR1	282	2000	10.124146660402	4.98817194661333	2.65688285299192	3	346.60902929533	79	9	4.82	4.82	4.84	6.82	4.27	0.13247090087431	0.601445289770059	2.4416022238937e-07	5.82621463896864e-11
117	BIR1	283	2000	9.23579482049714	10.5737312556039	6.1300064175297	3	346.60902929533	79	9	4.82	4.82	4.84	6.82	4.27	0.13247090087431	0.601445289770059	2.4416022238937e-07	5.82621463896864e-11
117	BIR1	284	2000	10.3315298970693	1.9526144827154	5.79646481393576	3	346.60902929533	79	9	4.82	4.82	4.84	6.82	4.27	0.13247090087431	0.601445289770059	2.4416022238937e-07	5.82621463896864e-11
117	BIR1	285	2000	12.3699453299517	0.351015343841066	3.82557072298132	3	346.60902929533	79	9	4.82	4.82	4.84	6.82	4.27	0.13247090087431	0.601445289770059	2.4416022238937e-07	5.82621463896864e-11
118	PIM1	174	1994	16.9472414385834	0.00617494921957862	2.13359848578621	22	368.339844824803	43	4	4.25	4.7	4.25	7.35	3.95	0.527675618826347	0.269320075166964	0.000596806986644283	5.82621463896864e-11
118	PIM1	175	1994	21.8551737174403	0.0061787222911529	2.87583341201415	22	368.339844824803	43	4	4.25	4.7	4.25	7.35	3.95	0.527675618826347	0.269320075166964	0.000596806986644283	5.82621463896864e-11
118	PIM1	176	1994	23.2128327326959	0.0484300132367865	3.55651483172791	22	368.339844824803	43	4	4.25	4.7	4.25	7.35	3.95	0.527675618826347	0.269320075166964	0.000596806986644283	5.82621463896864e-11
118	PIM1	177	1994	22.9015996032776	0.00493592864494552	1.6275176290962	22	368.339844824803	43	4	4.25	4.7	4.25	7.35	3.95	0.527675618826347	0.269320075166964	0.000596806986644283	5.82621463896864e-11
118	PIM1	178	1994	21.6188545778783	0	1.97660777411158	22	368.339844824803	43	4	4.25	4.7	4.25	7.35	3.95	0.527675618826347	0.269320075166964	0.000596806986644283	5.82621463896864e-11
118	PIM1	179	1994	26.2166424211038	0.183487039269126	1.70665323881107	22	368.339844824803	43	4	4.25	4.7	4.25	7.35	3.95	0.527675618826347	0.269320075166964	0.000596806986644283	5.82621463896864e-11
118	PIM1	180	1994	22.3101606710064	0.0382893607015315	3.15668029103301	22	368.339844824803	43	4	4.25	4.7	4.25	7.35	3.95	0.527675618826347	0.269320075166964	0.000596806986644283	5.82621463896864e-11
119	PIM1	181	1994	20.2343088896116	0.00619791755577825	2.06276306297769	22	368.339844824803	43	4	4.25	4.7	4.25	7.35	3.95	0.527675618826347	0.269320075166964	0.000596806986644283	5.82621463896864e-11
119	PIM1	182	1994	22.3485065706758	0.00620078301794891	2.18765680995605	22	368.339844824803	43	4	4.25	4.7	4.25	7.35	3.95	0.527675618826347	0.269320075166964	0.000596806986644283	5.82621463896864e-11
119	PIM1	183	1994	25.7392879749498	0.00620363354098874	2.27551732947336	22	368.339844824803	43	4	4.25	4.7	4.25	7.35	3.95	0.527675618826347	0.269320075166964	0.000596806986644283	5.82621463896864e-11
119	PIM1	184	1994	26.884234069094	0.00428456702319391	1.6045989223493	22	368.339844824803	43	4	4.25	4.7	4.25	7.35	3.95	0.527675618826347	0.269320075166964	0.000596806986644283	5.82621463896864e-11
119	PIM1	185	1994	21.3888250310481	14.3962871245225	2.03518569425159	22	368.339844824803	43	4	4.25	4.7	4.25	7.35	3.95	0.527675618826347	0.269320075166964	0.000596806986644283	5.82621463896864e-11
119	PIM1	186	1994	18.4652708347443	0.00601137374871286	2.24553564278542	22	368.339844824803	43	4	4.25	4.7	4.25	7.35	3.95	0.527675618826347	0.269320075166964	0.000596806986644283	5.82621463896864e-11
119	PIM1	187	1994	19.9250842323717	0.396095108973711	1.57073776123357	22	368.339844824803	43	4	4.25	4.7	4.25	7.35	3.95	0.527675618826347	0.269320075166964	0.000596806986644283	5.82621463896864e-11
119	PIM1	188	1994	15.6299228673093	1.12836064483868	3.05246064063072	22	368.339844824803	43	4	4.25	4.7	4.25	7.35	3.95	0.527675618826347	0.269320075166964	0.000596806986644283	5.82621463896864e-11
120	PIM1	189	1994	18.3847332446807	0	2.43088147509907	22	368.339844824803	43	4	4.25	4.7	4.25	7.35	3.95	0.527675618826347	0.269320075166964	0.000596806986644283	5.82621463896864e-11
120	PIM1	190	1994	17.6107248422236	0.00623261064550906	1.91646830677858	22	368.339844824803	43	4	4.25	4.7	4.25	7.35	3.95	0.527675618826347	0.269320075166964	0.000596806986644283	5.82621463896864e-11
120	PIM1	191	1994	20.4915739251297	0.00622317324963584	1.30954851076447	22	368.339844824803	43	4	4.25	4.7	4.25	7.35	3.95	0.527675618826347	0.269320075166964	0.000596806986644283	5.82621463896864e-11
120	PIM1	192	1994	23.5051707487476	0.00622525262921858	2.34195005702023	22	368.339844824803	43	4	4.25	4.7	4.25	7.35	3.95	0.527675618826347	0.269320075166964	0.000596806986644283	5.82621463896864e-11
120	PIM1	193	1994	26.0061977432142	0.00622726038157007	2.99431005522009	22	368.339844824803	43	4	4.25	4.7	4.25	7.35	3.95	0.527675618826347	0.269320075166964	0.000596806986644283	5.82621463896864e-11
120	PIM1	194	1994	26.6879535996571	7.35467722701394	1.95990904720445	22	368.339844824803	43	4	4.25	4.7	4.25	7.35	3.95	0.527675618826347	0.269320075166964	0.000596806986644283	5.82621463896864e-11
121	PIM1	195	1994	21.1863448491957	1.00279359366341	1.74100678685479	22	368.339844824803	43	4	4.25	4.7	4.25	7.35	3.95	0.527675618826347	0.269320075166964	0.000596806986644283	5.82621463896864e-11
121	PIM1	196	1994	21.9275504828482	0.00473954672183741	1.56555737997062	22	368.339844824803	43	4	4.25	4.7	4.25	7.35	3.95	0.527675618826347	0.269320075166964	0.000596806986644283	5.82621463896864e-11
121	PIM1	197	1994	23.1035955117607	0.0062346233271402	1.57403905224898	22	368.339844824803	43	4	4.25	4.7	4.25	7.35	3.95	0.527675618826347	0.269320075166964	0.000596806986644283	5.82621463896864e-11
121	PIM1	198	1994	22.6172568077019	0	2.19357669981358	22	368.339844824803	43	4	4.25	4.7	4.25	7.35	3.95	0.527675618826347	0.269320075166964	0.000596806986644283	5.82621463896864e-11
121	PIM1	199	1994	22.1489087423057	0	2.24009502138716	22	368.339844824803	43	4	4.25	4.7	4.25	7.35	3.95	0.527675618826347	0.269320075166964	0.000596806986644283	5.82621463896864e-11
121	PIM1	200	1994	22.4218979539541	0	2.64361783877158	22	368.339844824803	43	4	4.25	4.7	4.25	7.35	3.95	0.527675618826347	0.269320075166964	0.000596806986644283	5.82621463896864e-11
121	PIM1	201	1994	21.2462031813659	0	2.1080807478956	22	368.339844824803	43	4	4.25	4.7	4.25	7.35	3.95	0.527675618826347	0.269320075166964	0.000596806986644283	5.82621463896864e-11
122	PIM1	202	1994	24.530325869544	0.00624248773017166	1.43311537185968	22	368.339844824803	43	4	4.25	4.7	4.25	7.35	3.95	0.527675618826347	0.269320075166964	0.000596806986644283	5.82621463896864e-11
122	PIM1	203	1994	24.8048147809503	0.116602519865952	1.44940745151486	22	368.339844824803	43	4	4.25	4.7	4.25	7.35	3.95	0.527675618826347	0.269320075166964	0.000596806986644283	5.82621463896864e-11
122	PIM1	204	1994	25.8374765285704	0.00624526734431408	2.01122685885683	22	368.339844824803	43	4	4.25	4.7	4.25	7.35	3.95	0.527675618826347	0.269320075166964	0.000596806986644283	5.82621463896864e-11
122	PIM1	205	1994	26.7236528393278	2.74405122379365	2.37018588676065	22	368.339844824803	43	4	4.25	4.7	4.25	7.35	3.95	0.527675618826347	0.269320075166964	0.000596806986644283	5.82621463896864e-11
122	PIM1	206	1994	22.493081957208	8.58997855719376	2.01133854238142	22	368.339844824803	43	4	4.25	4.7	4.25	7.35	3.95	0.527675618826347	0.269320075166964	0.000596806986644283	5.82621463896864e-11
122	PIM1	207	1994	24.9315929001699	0	1.28811678718432	22	368.339844824803	43	4	4.25	4.7	4.25	7.35	3.95	0.527675618826347	0.269320075166964	0.000596806986644283	5.82621463896864e-11
122	PIM1	208	1994	26.9599309424211	0.213780624128484	1.58741981066914	22	368.339844824803	43	4	4.25	4.7	4.25	7.35	3.95	0.527675618826347	0.269320075166964	0.000596806986644283	5.82621463896864e-11
123	PIM1	209	1994	25.176392508918	0.677483277318101	2.66652344170087	22	368.339844824803	43	4	4.25	4.7	4.25	7.35	3.95	0.527675618826347	0.269320075166964	0.000596806986644283	5.82621463896864e-11
123	PIM1	210	1994	21.5309325811341	0.00497883630501761	1.79165970374455	22	368.339844824803	43	4	4.25	4.7	4.25	7.35	3.95	0.527675618826347	0.269320075166964	0.000596806986644283	5.82621463896864e-11
123	PIM1	211	1994	25.5257902929819	0.00447167425867923	1.71630766382038	22	368.339844824803	43	4	4.25	4.7	4.25	7.35	3.95	0.527675618826347	0.269320075166964	0.000596806986644283	5.82621463896864e-11
123	PIM1	212	1994	26.0781372740286	0.038492799550057	2.76176164404071	22	368.339844824803	43	4	4.25	4.7	4.25	7.35	3.95	0.527675618826347	0.269320075166964	0.000596806986644283	5.82621463896864e-11
123	PIM1	213	1994	21.2075048918411	0.777577654812599	2.31796127076437	22	368.339844824803	43	4	4.25	4.7	4.25	7.35	3.95	0.527675618826347	0.269320075166964	0.000596806986644283	5.82621463896864e-11
123	PIM1	214	1994	21.3669880621592	0.0062438897711381	1.61554601103565	22	368.339844824803	43	4	4.25	4.7	4.25	7.35	3.95	0.527675618826347	0.269320075166964	0.000596806986644283	5.82621463896864e-11
123	PIM1	215	1994	25.518255026918	0.00625751367259664	1.44380401661178	22	368.339844824803	43	4	4.25	4.7	4.25	7.35	3.95	0.527675618826347	0.269320075166964	0.000596806986644283	5.82621463896864e-11
124	PIM1	216	1994	28.7098926862536	0	2.50812899302009	22	368.339844824803	43	4	4.25	4.7	4.25	7.35	3.95	0.527675618826347	0.269320075166964	0.000596806986644283	5.82621463896864e-11
[truncated: 14,909 more rows]
